# Supplementary material
Source: publisher site journal article supplement (https://www.dovepress.com/article/449044)
Supplement: Supplementary file 1 [file get_supplementary_file.php]

# Supplemental material 1

|         | gender | age | ethnicity           |
|---------|--------|-----|---------------------|
| mild1   | male   | 42  | the Han nationality |
| mild2   | female | 40  | the Han nationality |
| mild3   | male   | 39  | the Han nationality |
| severe1 | female | 45  | the Han nationality |
| severe2 | female | 47  | the Han nationality |
| severe3 | male   | 42  | the Han nationality |

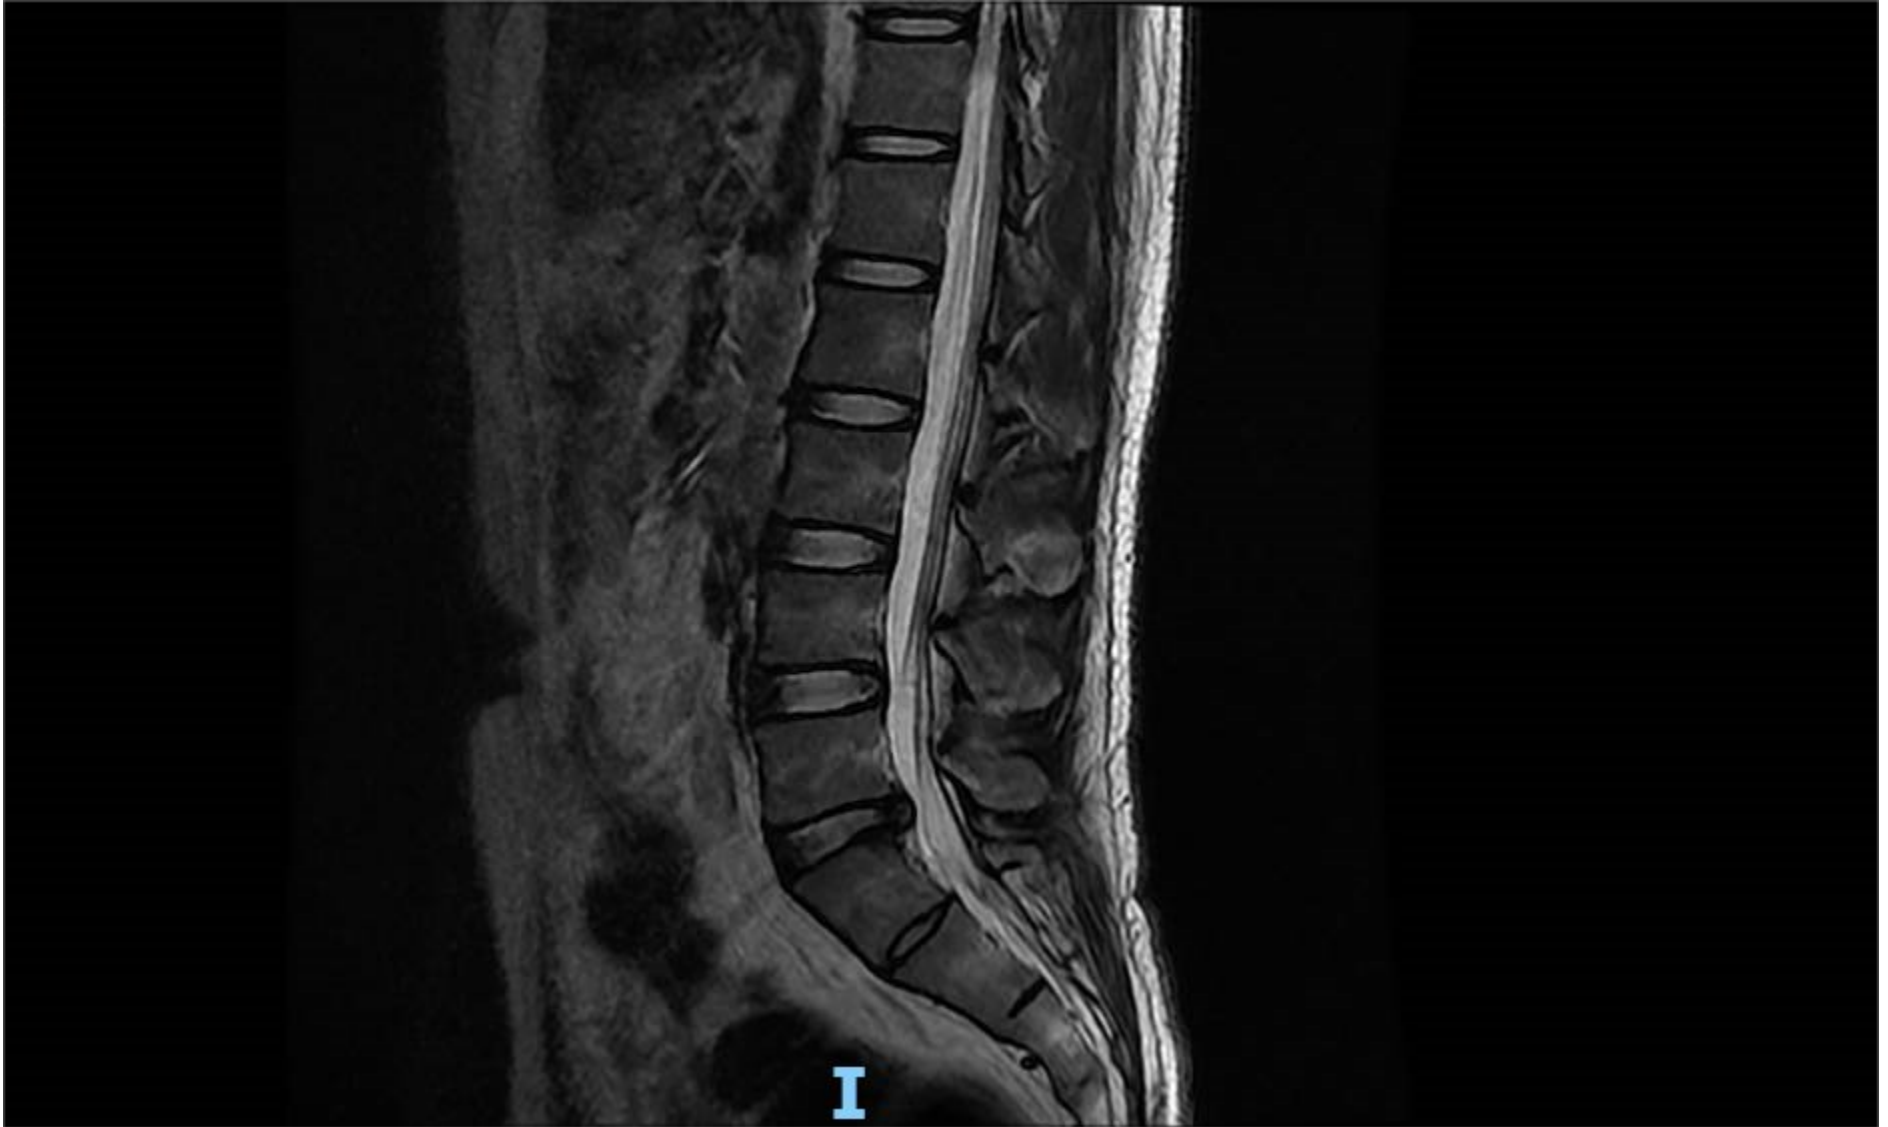

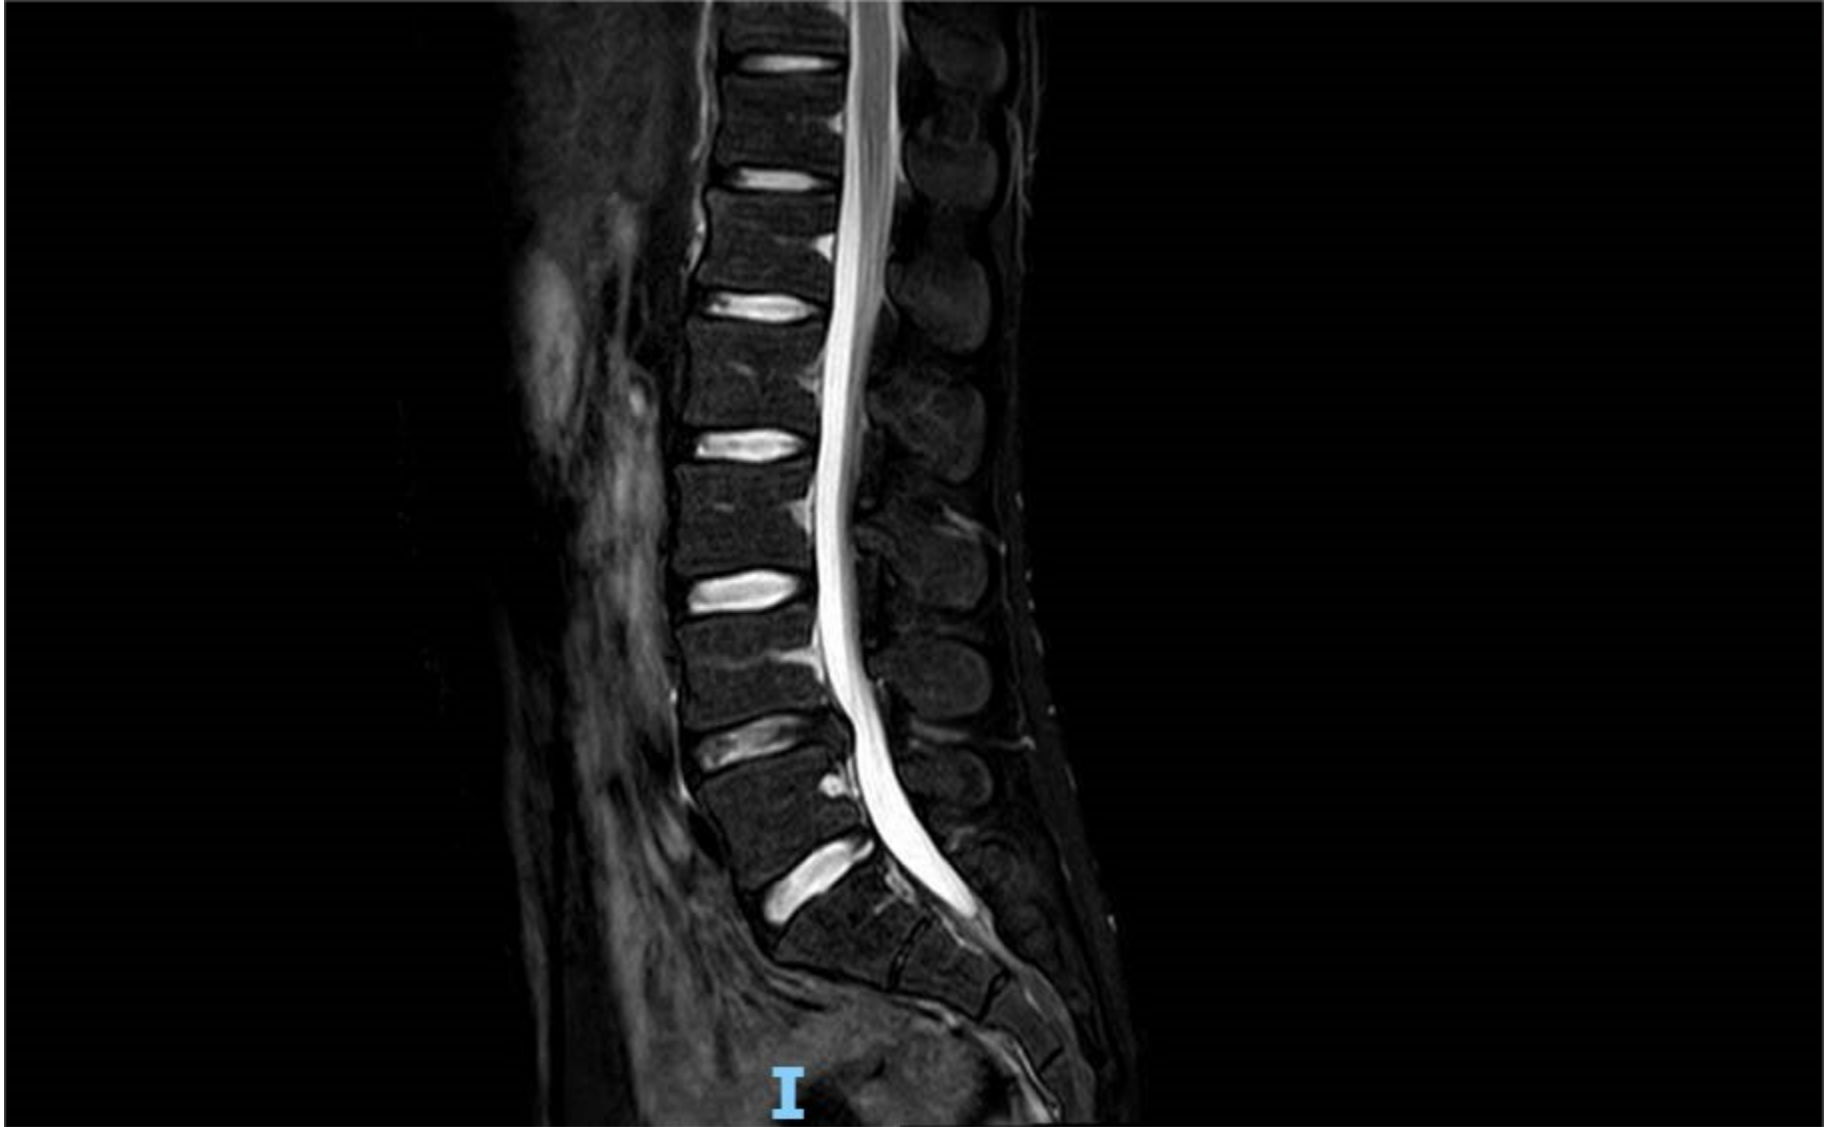

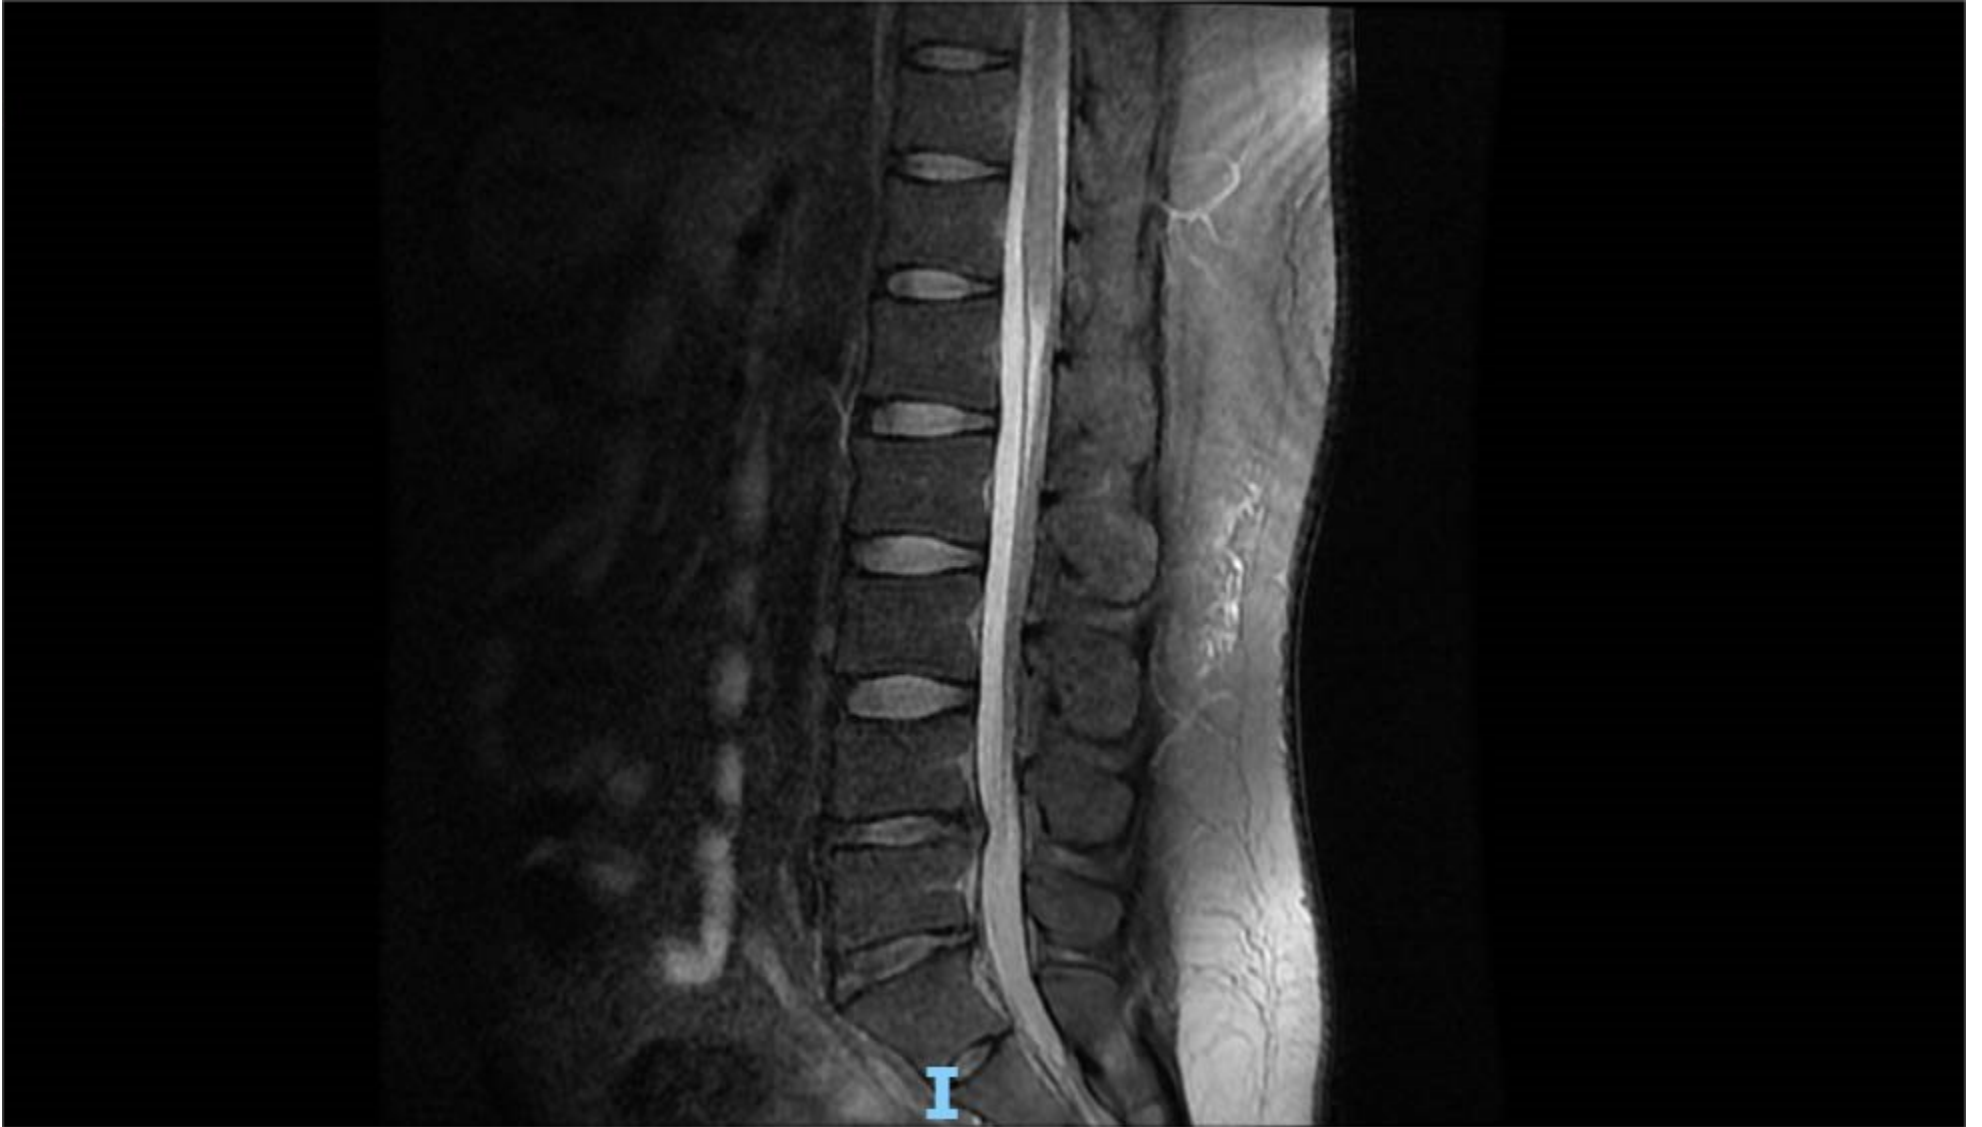

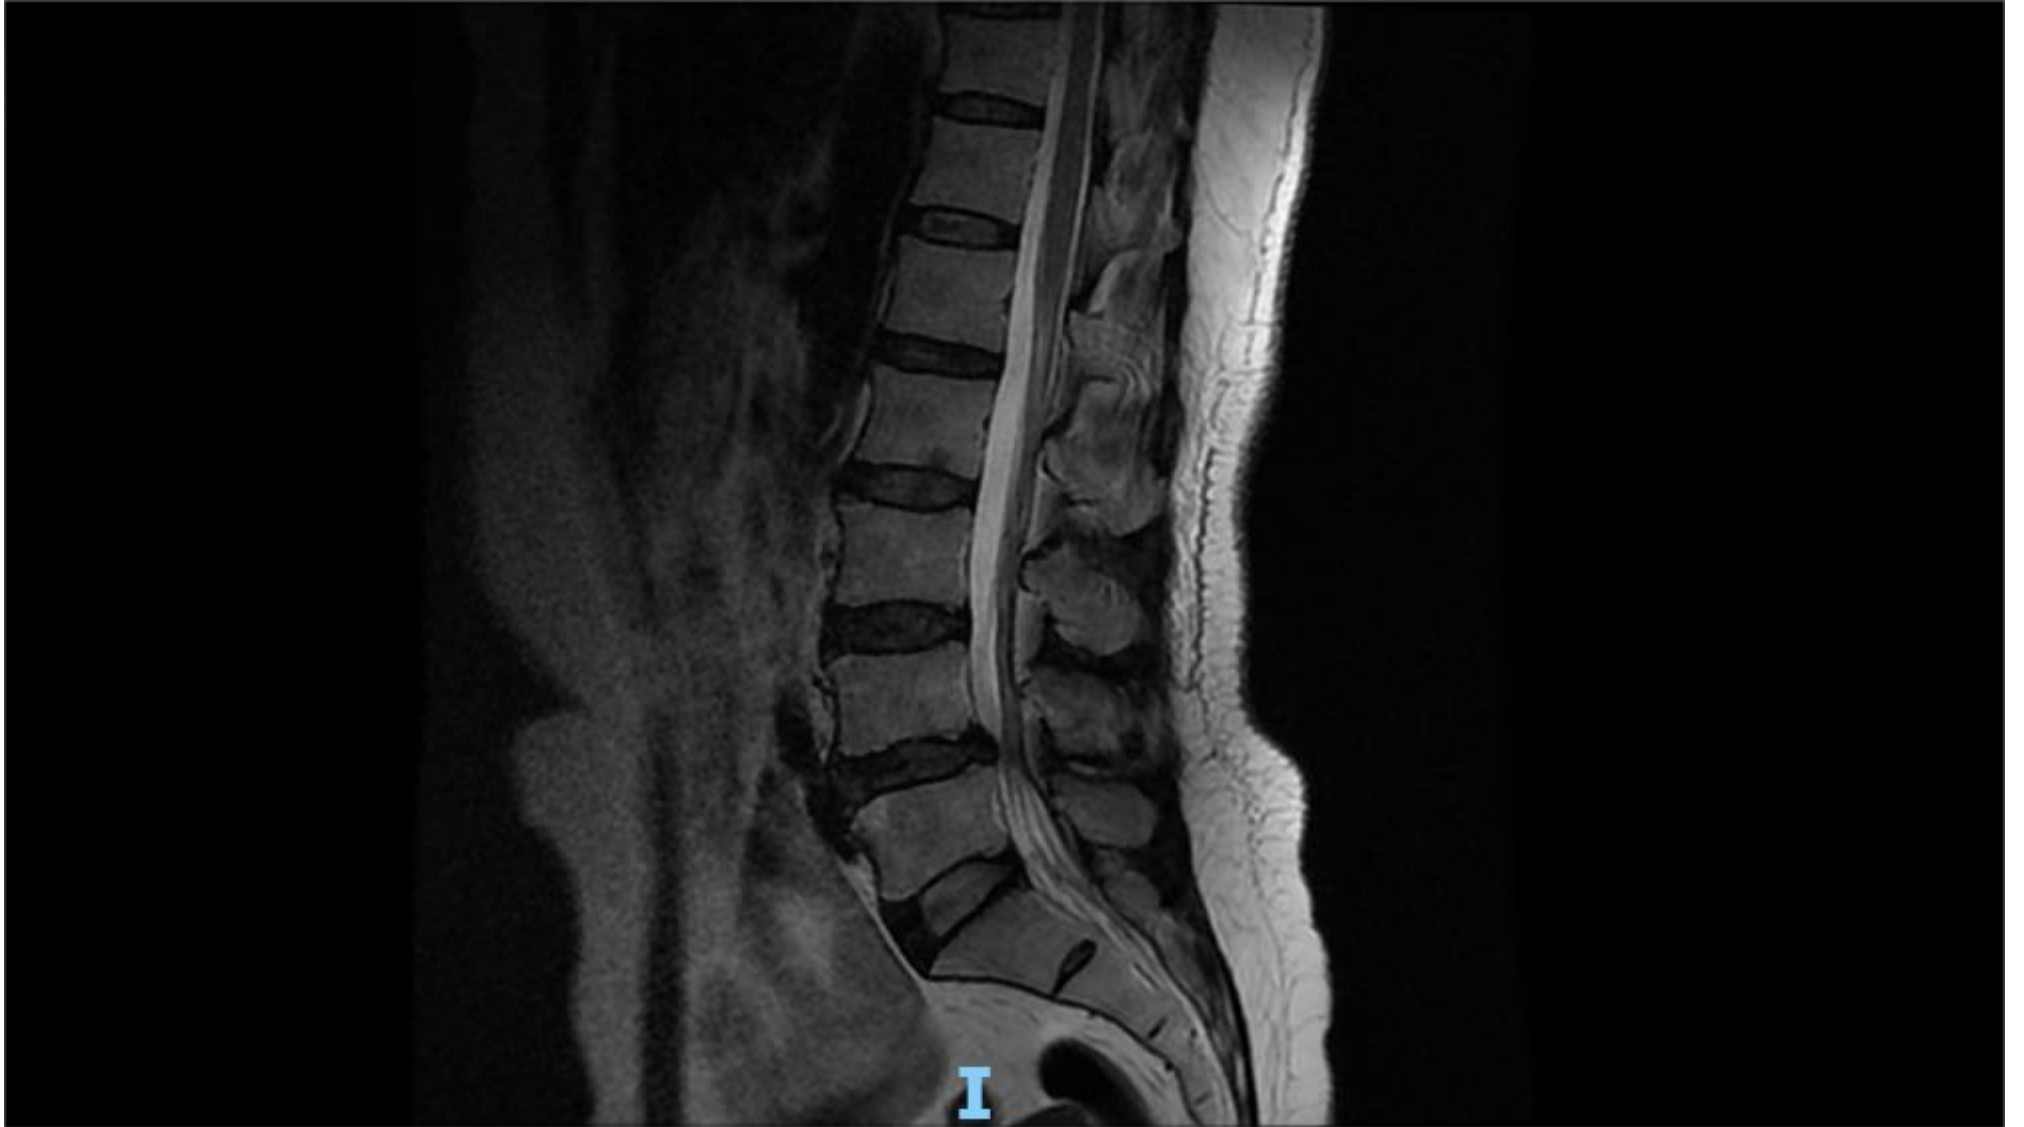

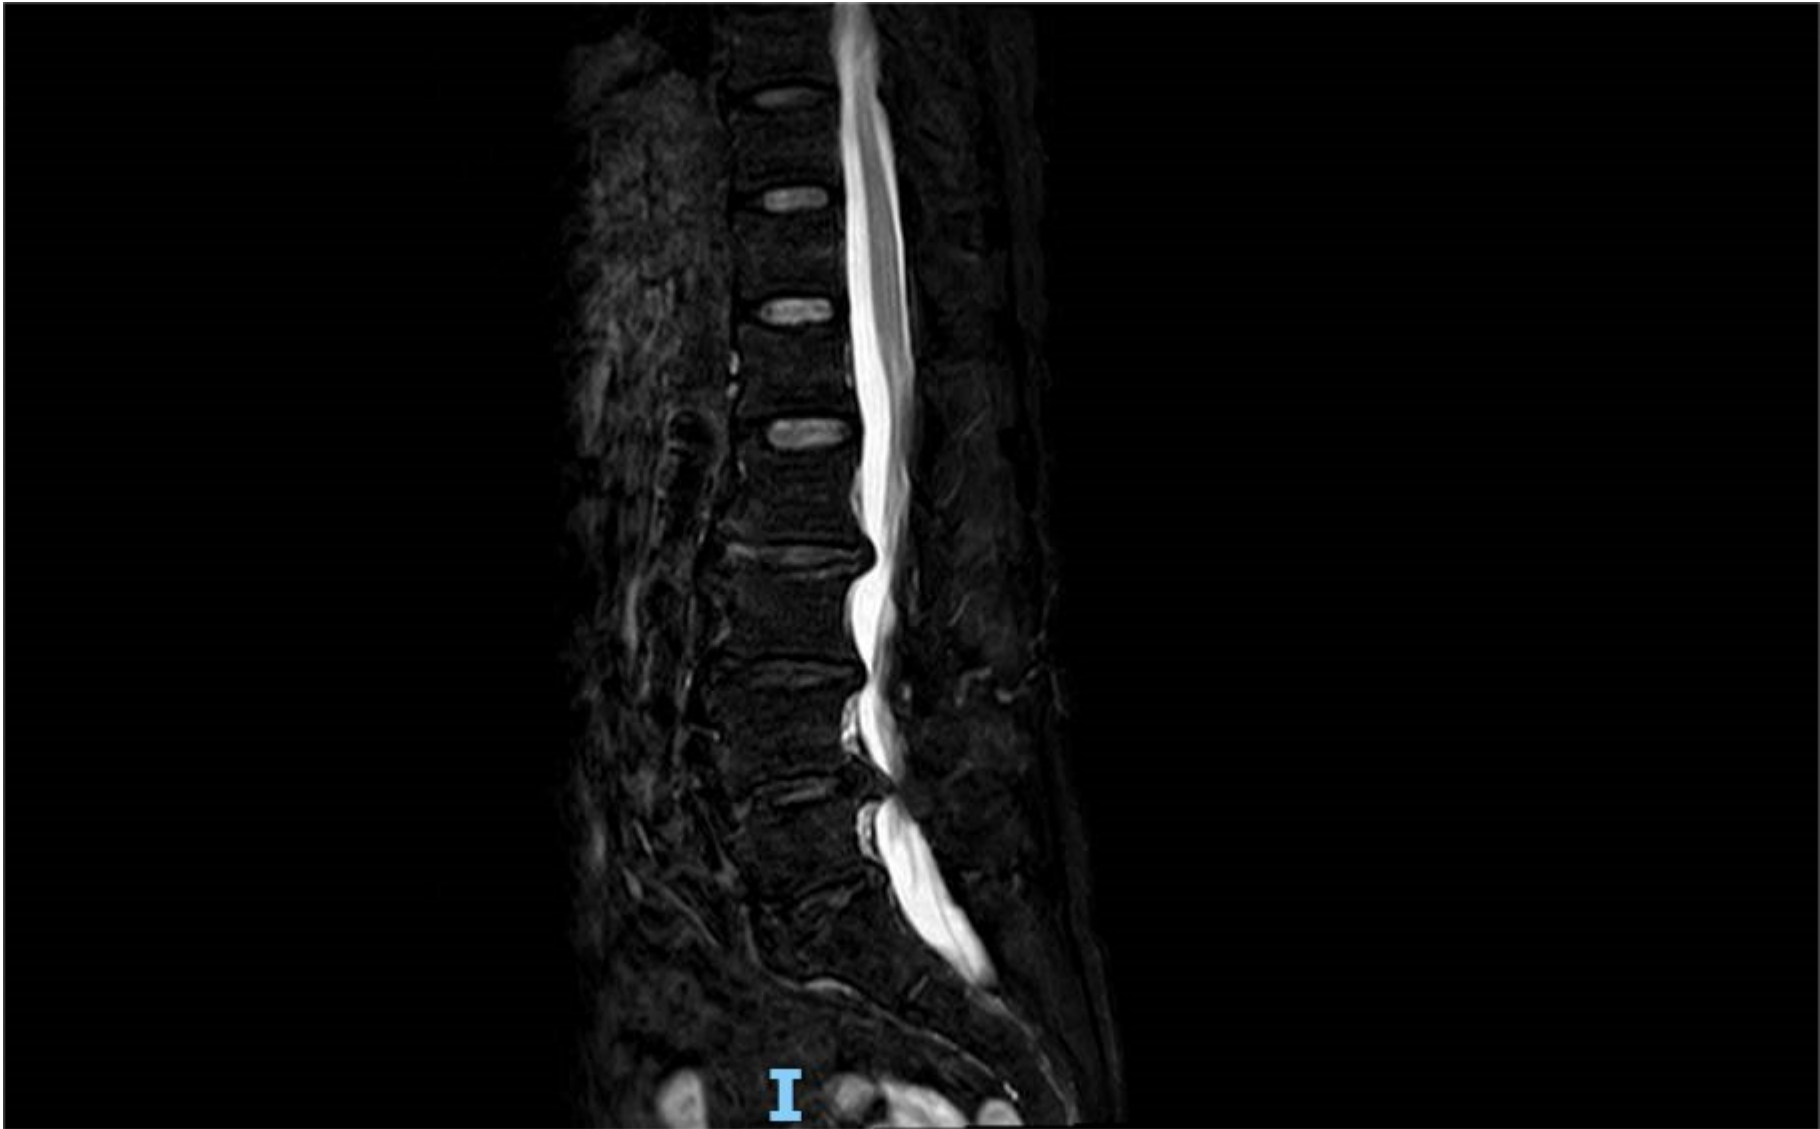

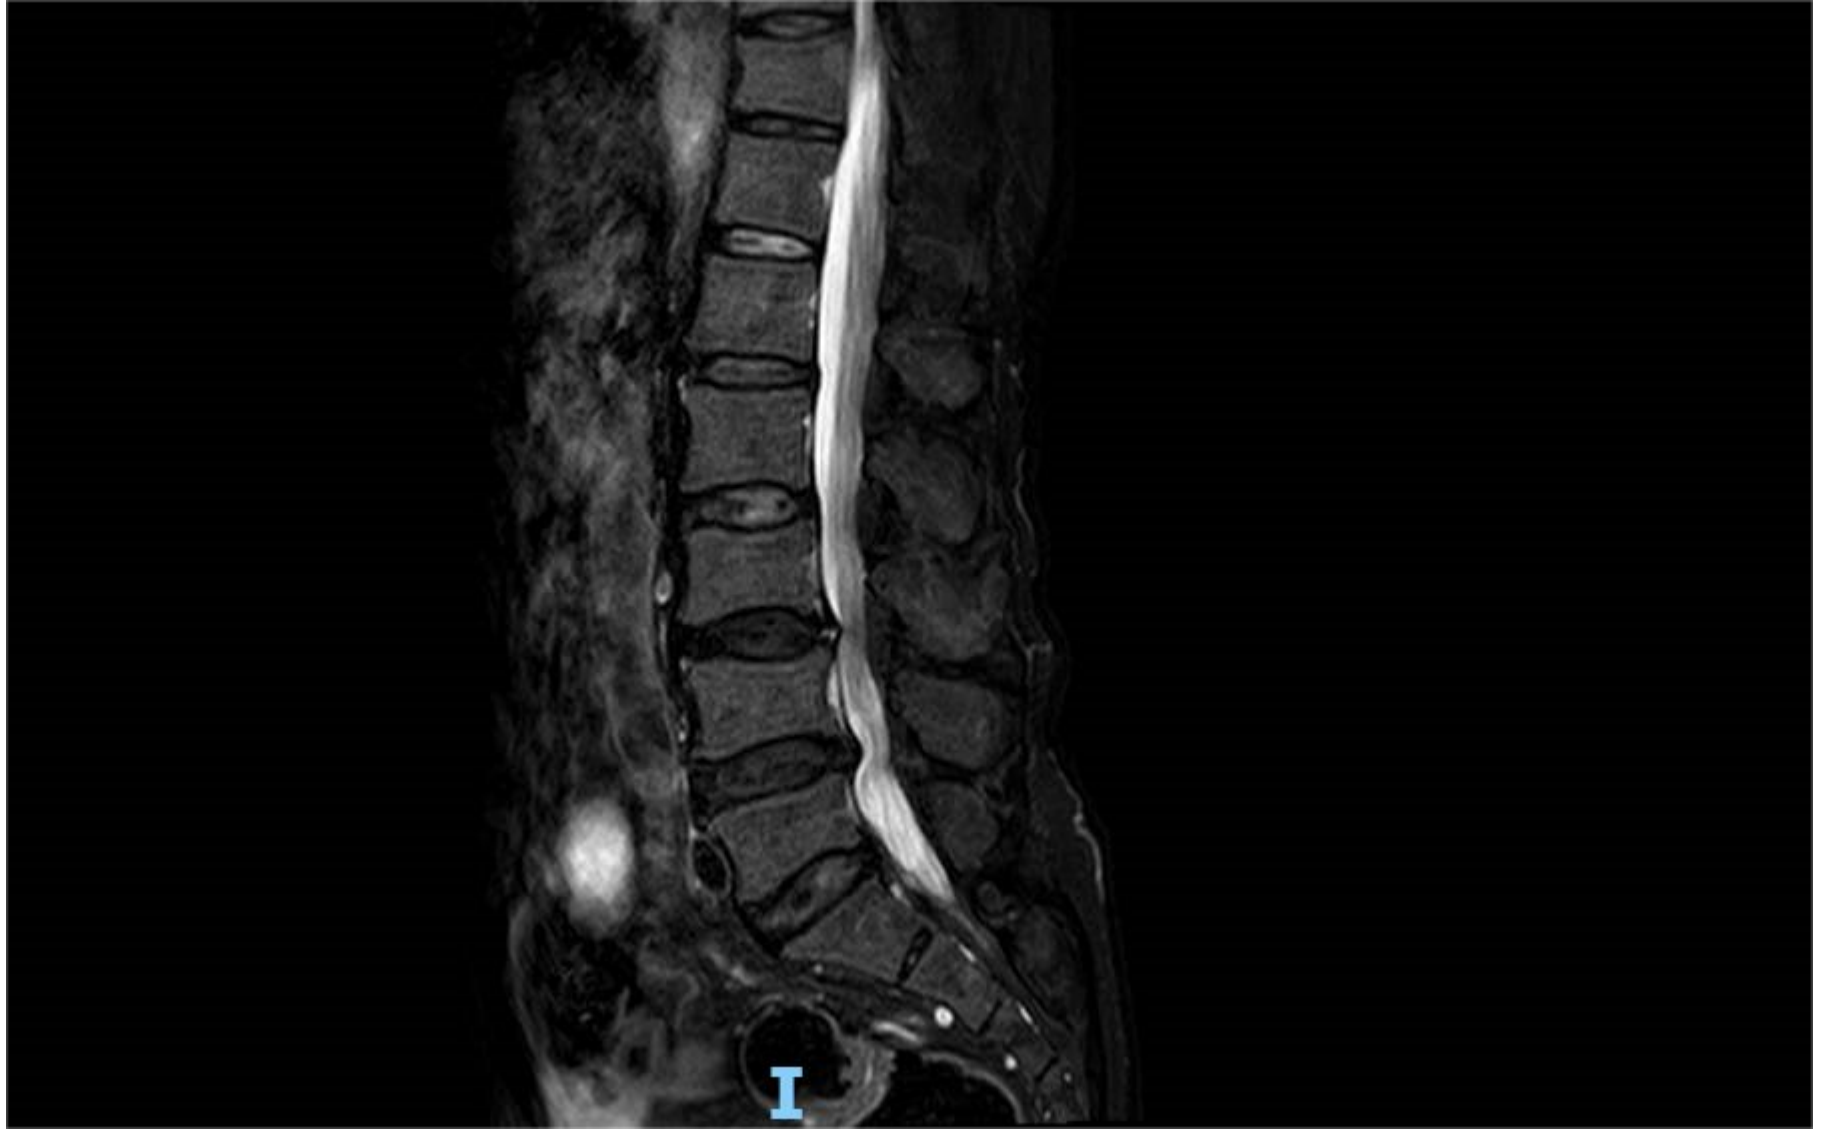

## Supplemental material 2

| Accession | Descripti   | Coverage # | Peptide# | PSMs | # Unique | # AAs | MW [kDa] | calc. pI |
|-----------|-------------|------------|----------|------|----------|-------|----------|----------|
| AOA024R46 | Fibronect   | 64         | 119      | 2847 | 0        | 2355  | 259      | 5.73     |
| P02751    | Fibronect   | 61         | 117      | 2720 | 2        | 2477  | 272.2    | 5.5      |
| Q6N084    | Uncharact   | 74         | 56       | 1378 | 1        | 1034  | 113.3    | 6.07     |
| AOA087X1T | Aggrecan    | 24         | 50       | 1393 | 2        | 2473  | 255.4    | 4.13     |
| P16112    | Aggrecan    | 23         | 49       | 1379 | 1        | 2530  | 261.2    | 4.13     |
| P02768    | Serum alb   | 78         | 61       | 1115 | 1        | 609   | 69.3     | 6.28     |
| F6KPG5    | Albumin (   | 81         | 62       | 1025 | 2        | 585   | 66.5     | 6.04     |
| Q53FR6    | Cartilage   | 60         | 45       | 624  | 7        | 757   | 82.7     | 4.61     |
| B4DN75    | cDNA FLJ6   | 65         | 41       | 562  | 3        | 684   | 75.1     | 4.63     |
| A6YID6    | Fibronect   | 56         | 27       | 639  | 1        | 644   | 70.2     | 5.86     |
| P68871    | Hemoglobi   | 79         | 13       | 651  | 1        | 147   | 16       | 7.28     |
| AOA384NK  | Clusterin   | 47         | 31       | 568  | 13       | 501   | 57.8     | 6.68     |
| AOA1B4W   | Beta glob   | 77         | 10       | 531  | 1        | 105   | 11.5     | 6.68     |
| D9ZGF2    | Collagen,   | 50         | 134      | 480  | 18       | 3177  | 343.5    | 6.68     |
| P01023    | Alpha-2-m   | 56         | 61       | 487  | 53       | 1474  | 163.2    | 6.46     |
| B7ZW00    | COL6A3 pr   | 54         | 119      | 457  | 3        | 2570  | 278      | 8.15     |
| O75339    | Cartilage   | 44         | 54       | 415  | 54       | 1184  | 132.5    | 8.41     |
| P01024    | Complemen   | 67         | 104      | 421  | 100      | 1663  | 187      | 6.4      |
| Q7Z351    | Uncharact   | 42         | 16       | 362  | 1        | 482   | 52.8     | 8.48     |
| Q6MZQ6    | Uncharact   | 43         | 16       | 361  | 1        | 475   | 52       | 8.06     |
| Q4TZM4    | Hemoglobi   | 89         | 9        | 428  | 1        | 101   | 11       | 6.52     |
| Q3LR79    | Hemoglobi   | 85         | 9        | 428  | 1        | 105   | 11.5     | 5.77     |
| HOYC35    | Clusterin   | 59         | 17       | 417  | 1        | 284   | 33.5     | 5.74     |
| Q8IUL9    | Hemoglobi   | 86         | 10       | 393  | 1        | 105   | 11.5     | 6.05     |
| AOA384N66 | Epididymi   | 47         | 15       | 393  | 15       | 338   | 38.4     | 6.61     |
| AOA1S5U   | Z3Hemoglobi | 75         | 10       | 362  | 2        | 187   | 20.1     | 8.9      |
| Q92954    | Proteogly   | 55         | 63       | 432  | 34       | 1404  | 151      | 9.51     |
| P02647    | Apolipoppr  | 80         | 33       | 339  | 33       | 267   | 30.8     | 5.76     |
| B4DDQ2    | Biglycan    | 59         | 18       | 301  | 10       | 334   | 37.6     | 7.97     |
| P02042    | Hemoglobi   | 79         | 12       | 312  | 1        | 147   | 16       | 8.05     |
| Q4ZGM8    | Hemoglobi   | 87         | 9        | 311  | 2        | 100   | 10.8     | 9.04     |
| Q96T46    | Hemoglobi   | 95         | 7        | 288  | 1        | 76    | 8.4      | 7.14     |
| P07585    | Decorin C   | 50         | 20       | 300  | 19       | 359   | 39.7     | 8.54     |
| B4E1B2    | cDNA FLJ5   | 72         | 50       | 267  | 5        | 678   | 74.8     | 7.12     |
| AOA0K0K1H | Epididymi   | 70         | 47       | 264  | 2        | 698   | 77       | 7.21     |
| P01009    | Alpha-1-a   | 58         | 29       | 259  | 29       | 418   | 46.7     | 5.59     |
| P51888    | Prolargin   | 53         | 18       | 285  | 18       | 382   | 43.8     | 9.38     |
| D3YTG3    | Target of   | 22         | 31       | 236  | 3        | 1777  | 195.2    | 9.73     |
| K7EPJ4    | Cartilage   | 53         | 55       | 250  | 55       | 1162  | 126.8    | 8.27     |
| Q7Z7G0    | Target of   | 34         | 29       | 232  | 1        | 1075  | 118.6    | 9.44     |
| Q4F786    | Hemoglobi   | 86         | 8        | 242  | 1        | 105   | 11.4     | 6.68     |
| B4DN21    | cDNA FLJ5   | 75         | 20       | 237  | 1        | 306   | 34.5     | 5.64     |
| COJYY2    | Apolipoppr  | 37         | 146      | 237  | 146      | 4563  | 515.2    | 7.05     |
| Q6PIL8    | IGK@ prot   | 40         | 8        | 182  | 1        | 236   | 25.8     | 6.55     |
| P02675    | Fibrinoge   | 75         | 33       | 213  | 33       | 491   | 55.9     | 8.27     |
| AOA024RAE | Heparan s   | 31         | 98       | 216  | 98       | 4346  | 463.7    | 6.51     |
| AOA024RAK | Hyalurona   | 55         | 19       | 196  | 17       | 354   | 40.1     | 7.42     |
| E9PEW8    | Hemoglobi   | 86         | 8        | 193  | 1        | 104   | 11.3     | 6.37     |
| C9JKG1    | Biglycan    | 39         | 8        | 171  | 1        | 238   | 26.7     | 6.79     |
| J3QSU6    | Tenascin    | 38         | 60       | 194  | 2        | 2019  | 220.7    | 4.93     |



|           |           |    |    |     |    |      |       |      |
|-----------|-----------|----|----|-----|----|------|-------|------|
| AOA024R88 | Tenascin  | 34 | 61 | 192 | 3  | 2201 | 240.8 | 4.92 |
| O15335    | Chondroad | 63 | 18 | 197 | 18 | 359  | 40.5  | 9.39 |
| B4DI63    | cDNA FLJ5 | 49 | 16 | 204 | 16 | 356  | 40.5  | 7.99 |
| Q06828    | Fibromodu | 49 | 14 | 164 | 14 | 376  | 43.2  | 6.04 |
| Q6N093    | Uncharact | 36 | 13 | 198 | 1  | 417  | 46    | 7.59 |
| B4DMR3    | cDNA FLJ5 | 65 | 26 | 203 | 26 | 334  | 37.1  | 9.52 |
| P02671    | Fibrinoge | 38 | 33 | 198 | 33 | 866  | 94.9  | 6.01 |
| Q8NF17    | FLJ00385  | 40 | 16 | 189 | 6  | 509  | 56.1  | 7.59 |
| AOA286YEY | Immunoglo | 33 | 12 | 185 | 1  | 395  | 43.8  | 6.52 |
| P12109    | Collagen  | 43 | 37 | 175 | 37 | 1028 | 108.5 | 5.43 |
| Q99715    | Collagen  | 41 | 95 | 172 | 95 | 3063 | 332.9 | 5.53 |
| PODOX7    | Immunoglo | 45 | 7  | 143 | 1  | 214  | 23.4  | 7.17 |
| AOA140TA2 | Complemen | 43 | 62 | 169 | 1  | 1698 | 187.5 | 7.33 |
| AOA140TA3 | Complemen | 42 | 61 | 168 | 0  | 1698 | 187.6 | 7.12 |
| POCOL4    | Complemen | 41 | 62 | 166 | 2  | 1744 | 192.7 | 7.08 |
| Q8IWM0    | Apolipopr | 61 | 6  | 164 | 1  | 76   | 9.1   | 8.15 |
| AOA140VJJ | Testicula | 74 | 28 | 153 | 3  | 437  | 49.5  | 6.09 |
| Q68CN4    | Uncharact | 24 | 11 | 154 | 1  | 470  | 51.5  | 7.56 |
| U3PXP0    | Alpha glo | 67 | 3  | 166 | 1  | 51   | 5.7   | 7.52 |
| P07996    | Thrombosp | 36 | 44 | 143 | 1  | 1170 | 129.3 | 4.94 |
| AOA024R9G | Thrombosp | 36 | 44 | 142 | 1  | 1170 | 129.3 | 4.94 |
| Q92743    | Serine pr | 51 | 26 | 140 | 26 | 480  | 51.3  | 7.83 |
| AOA2S1CVU | Beta-glob | 84 | 5  | 151 | 1  | 55   | 6     | 4.81 |
| E9M263    | Hemoglobi | 84 | 5  | 151 | 1  | 57   | 6.2   | 4.64 |
| AOA024RAQ | Chondroit | 12 | 36 | 134 | 5  | 3396 | 372.6 | 4.51 |
| AOA024RAL | Chondroit | 15 | 32 | 132 | 1  | 2409 | 264.9 | 4.54 |
| P02458    | Collagen  | 20 | 30 | 134 | 27 | 1487 | 141.7 | 6.92 |
| S6BGD6    | IgG L cha | 38 | 7  | 101 | 1  | 235  | 24.8  | 7.24 |
| D3DP16    | Fibrinoge | 84 | 26 | 125 | 1  | 334  | 37.7  | 6.29 |
| P19823    | Inter-alp | 31 | 28 | 128 | 28 | 946  | 106.4 | 6.86 |
| P02549    | Spectrin  | 43 | 86 | 123 | 86 | 2419 | 279.8 | 5.05 |
| A3KC71    | Nuclear e | 42 | 38 | 118 | 38 | 950  | 108.1 | 9.72 |
| AOA0A0MTC | Gelsolin  | 44 | 30 | 114 | 28 | 767  | 84.7  | 5.83 |
| AOA024R9G | HCG40889, | 48 | 52 | 112 | 2  | 1231 | 139   | 6.62 |
| P06733    | Alpha-enc | 67 | 27 | 119 | 17 | 434  | 47.1  | 7.39 |
| A8K5T0    | cDNA FLJ7 | 47 | 51 | 107 | 1  | 1231 | 138.9 | 6.71 |
| AOA384MDF | Epididymi | 29 | 29 | 108 | 29 | 1019 | 108.5 | 6.21 |
| Q9NR99    | Matrix-re | 21 | 55 | 120 | 55 | 2828 | 312   | 8.32 |
| Q15582    | Transform | 51 | 26 | 114 | 26 | 683  | 74.6  | 7.71 |
| V9HWB8    | Pyruvate  | 66 | 31 | 103 | 3  | 531  | 57.9  | 7.84 |
| Q6N092    | Uncharact | 34 | 15 | 83  | 9  | 519  | 56.4  | 6.93 |
| P00747    | Plasminog | 54 | 41 | 114 | 41 | 810  | 90.5  | 7.24 |
| S6BGE0    | IgG H cha | 30 | 6  | 78  | 1  | 300  | 32.2  | 7.85 |
| S6C4R7    | IgG L cha | 32 | 6  | 87  | 1  | 212  | 22.5  | 8.24 |
| S6BAR0    | IgG L cha | 31 | 6  | 86  | 1  | 216  | 23.1  | 7.69 |
| P06727    | Apolipopr | 77 | 34 | 101 | 34 | 396  | 45.4  | 5.38 |
| P04406    | Glycerald | 57 | 17 | 99  | 17 | 335  | 36    | 8.46 |
| P08670    | Vimentin  | 71 | 36 | 102 | 35 | 466  | 53.6  | 5.12 |
| Q6GMW4    | IGL@ prot | 36 | 7  | 88  | 3  | 233  | 24.8  | 6.74 |
| B4E1Z4    | cDNA FLJ5 | 37 | 49 | 107 | 32 | 1266 | 140.9 | 7.18 |
| P11277    | Spectrin  | 39 | 75 | 99  | 3  | 2137 | 246.3 | 5.27 |

|           |           |     |    |     |    |      |       |      |
|-----------|-----------|-----|----|-----|----|------|-------|------|
| AOA5H1ZRQ | Immunoglo | 58  | 5  | 79  | 2  | 106  | 11.3  | 8.29 |
| AOA286YFJ | Immunoglo | 40  | 11 | 90  | 5  | 396  | 43.8  | 6.24 |
| AOA024R5Z | Pyruvate  | 60  | 30 | 95  | 2  | 531  | 58    | 7.71 |
| AOA024R67 | Spectrin  | 35  | 73 | 97  | 1  | 2328 | 267.6 | 5.36 |
| P61626    | Lysozyme  | 62  | 9  | 100 | 9  | 148  | 16.5  | 9.16 |
| Q5FWF9    | IGL@ prot | 32  | 6  | 72  | 1  | 232  | 24.8  | 5.59 |
| P01008    | Antithrom | 48  | 25 | 91  | 25 | 464  | 52.6  | 6.71 |
| P00738    | Haptoglob | 58  | 25 | 90  | 14 | 406  | 45.2  | 6.58 |
| B4DW52    | cDNA FLJ5 | 59  | 15 | 87  | 2  | 347  | 38.6  | 5.35 |
| D9ZGG2    | Vitronect | 34  | 13 | 91  | 13 | 478  | 54.3  | 5.8  |
| P01031    | Complemen | 31  | 49 | 96  | 49 | 1676 | 188.2 | 6.52 |
| B7Z6P1    | cDNA FLJ5 | 52  | 16 | 98  | 6  | 343  | 38.6  | 5.38 |
| S6AWF4    | IgG L cha | 29  | 5  | 71  | 1  | 180  | 19.8  | 7.09 |
| AOA2R8Y79 | Actin, cy | 66  | 16 | 83  | 1  | 309  | 34.1  | 5.17 |
| P02790    | Hemopexin | 45  | 17 | 77  | 17 | 462  | 51.6  | 7.02 |
| D6RF35    | Vitamin D | 63  | 29 | 77  | 2  | 476  | 53    | 5.52 |
| V9HWI6    | Epididymi | 66  | 28 | 76  | 1  | 474  | 52.9  | 5.54 |
| B7Z539    | cDNA FLJ5 | 34  | 18 | 78  | 11 | 645  | 72.1  | 7.68 |
| A5PL27    | CP protei | 36  | 30 | 76  | 30 | 1065 | 122.1 | 5.72 |
| V9HWF4    | Phosphogl | 76  | 30 | 81  | 26 | 417  | 44.6  | 8.1  |
| B2R950    | cDNA, FLJ | 10  | 13 | 76  | 5  | 1482 | 163.8 | 6.38 |
| AOA024RC5 | Milk fat  | 73  | 21 | 71  | 1  | 387  | 43.1  | 8.15 |
| P00734    | Prothromb | 45  | 24 | 70  | 24 | 622  | 70    | 5.9  |
| B2RMS9    | Inter-alp | 35  | 27 | 73  | 11 | 930  | 103.3 | 6.98 |
| Q08431    | Lactadher | 73  | 21 | 70  | 1  | 387  | 43.1  | 8.15 |
| P08758    | Annexin A | 66  | 18 | 70  | 18 | 320  | 35.9  | 5.05 |
| Q8IUX7    | Adipocyte | 34  | 32 | 73  | 32 | 1158 | 130.8 | 5.11 |
| Q09666    | Neuroblas | 27  | 72 | 83  | 72 | 5890 | 628.7 | 6.15 |
| P07355    | Annexin A | 59  | 24 | 67  | 24 | 339  | 38.6  | 7.75 |
| O60687    | Sushi rep | 37  | 15 | 69  | 15 | 465  | 52.9  | 7.25 |
| Q15063    | Periostin | 52  | 33 | 65  | 5  | 836  | 93.3  | 7.53 |
| V9HWE3    | Carbonic  | 56  | 11 | 70  | 11 | 261  | 28.9  | 7.12 |
| AOA024R6F | Serpin pe | 36  | 14 | 62  | 14 | 423  | 47.6  | 5.52 |
| B2R6V9    | cDNA, FLJ | 30  | 18 | 62  | 3  | 732  | 83.2  | 6    |
| P05154    | Plasma se | 33  | 15 | 61  | 15 | 406  | 45.6  | 9.26 |
| AOA4P8J4E | IgL_IGLV3 | 24  | 3  | 46  | 1  | 151  | 16.2  | 5.9  |
| Q6YHK3    | CD109 ant | 19  | 24 | 63  | 24 | 1445 | 161.6 | 5.85 |
| B2R5M9    | cDNA, FLJ | 37  | 24 | 60  | 24 | 727  | 83.5  | 7.02 |
| Q15113    | Procollag | 44  | 15 | 58  | 15 | 449  | 47.9  | 7.43 |
| Q6VFAQ6   | Hemoglobi | 62  | 3  | 55  | 1  | 42   | 4.5   | 8.24 |
| AOA024RDT | Periostin | 50  | 29 | 59  | 1  | 779  | 87    | 7.81 |
| Q5XTR9    | Hemoglobi | 100 | 4  | 71  | 1  | 34   | 3.9   | 5.62 |
| O00300    | Tumor nec | 45  | 20 | 62  | 20 | 401  | 46    | 8.29 |
| B7Z4R8    | cDNA FLJ5 | 55  | 30 | 75  | 1  | 853  | 89.5  | 8.91 |
| E2RVJ0    | Anion exc | 25  | 19 | 53  | 19 | 912  | 101.9 | 5.22 |
| AOA024R1N | Myosin, h | 27  | 45 | 55  | 42 | 1960 | 226.4 | 5.6  |
| V9HWK1    | Triosepho | 87  | 17 | 46  | 17 | 249  | 26.7  | 6.9  |
| O00391    | Sulphydry | 38  | 27 | 59  | 27 | 747  | 82.5  | 8.92 |
| AOA1U9X7I | COL11A2 C | 17  | 21 | 52  | 21 | 1736 | 171.7 | 6.39 |
| B3KQT8    | cDNA PSEC | 44  | 15 | 53  | 15 | 415  | 45.7  | 8.47 |
| P04083    | Annexin A | 58  | 18 | 48  | 18 | 346  | 38.7  | 7.02 |

|           |            |    |    |    |    |      |       |      |
|-----------|------------|----|----|----|----|------|-------|------|
| Q6UVK1    | Chondroit  | 26 | 44 | 57 | 44 | 2322 | 250.4 | 5.47 |
| AOA024R86 | Angiopoie  | 37 | 21 | 52 | 21 | 493  | 57.1  | 7.53 |
| AOA384MQX | Epididymi  | 48 | 30 | 51 | 30 | 664  | 74.1  | 7.02 |
| P02766    | Transthyr  | 63 | 8  | 42 | 8  | 147  | 15.9  | 5.76 |
| P26038    | Moesin OS  | 52 | 35 | 59 | 24 | 577  | 67.8  | 6.4  |
| Q14563    | Semaphori  | 29 | 20 | 56 | 20 | 771  | 88.8  | 7.42 |
| P04040    | Catalase   | 53 | 25 | 50 | 25 | 527  | 59.7  | 7.39 |
| P02760    | Protein A  | 44 | 12 | 45 | 12 | 352  | 39    | 6.25 |
| P35443    | Thrombosp  | 22 | 14 | 49 | 10 | 961  | 105.8 | 4.68 |
| AOA024R03 | Complemen  | 33 | 20 | 52 | 20 | 559  | 63.2  | 5.52 |
| B2R815    | cDNA, FLJ  | 43 | 17 | 49 | 17 | 427  | 48.5  | 7.75 |
| D9IWP9    | Beta-2-gl  | 49 | 14 | 44 | 14 | 326  | 36.2  | 8    |
| AOA384MDU | Collagen,  | 19 | 21 | 51 | 21 | 1366 | 129.2 | 8.95 |
| P69892    | Hemoglobi  | 78 | 12 | 49 | 3  | 147  | 16.1  | 7.2  |
| P00338    | L-lactate  | 43 | 15 | 48 | 14 | 332  | 36.7  | 8.27 |
| P35527    | Keratin,   | 47 | 24 | 44 | 23 | 623  | 62    | 5.24 |
| D3DNU8    | Kininogen  | 56 | 25 | 51 | 2  | 427  | 47.8  | 6.65 |
| B4E2L8    | cDNA FLJ5  | 29 | 16 | 49 | 1  | 626  | 70.3  | 5.34 |
| P35625    | Metallopr  | 53 | 10 | 52 | 10 | 211  | 24.1  | 8.72 |
| Q07954    | Prolow-de  | 10 | 41 | 56 | 41 | 4544 | 504.3 | 5.39 |
| B4E1C2    | Kininogen  | 38 | 25 | 51 | 2  | 644  | 71.9  | 6.81 |
| P13645    | Keratin,   | 44 | 23 | 46 | 21 | 584  | 58.8  | 5.21 |
| B2R8I2    | cDNA, FLJ  | 31 | 16 | 52 | 16 | 525  | 59.5  | 7.44 |
| P09871    | Complemen  | 34 | 20 | 47 | 19 | 688  | 76.6  | 4.96 |
| P00739    | Haptoglob  | 37 | 14 | 45 | 3  | 348  | 39    | 7.09 |
| P36955    | Pigment e  | 39 | 16 | 51 | 16 | 418  | 46.3  | 6.38 |
| D9YZU8    | Globin B1  | 77 | 11 | 45 | 2  | 147  | 16.1  | 7.2  |
| S6B2A6    | IgG H cha  | 28 | 6  | 41 | 1  | 300  | 32.1  | 7.25 |
| Q9Y490    | Talin-1 C  | 23 | 42 | 45 | 42 | 2541 | 269.6 | 6.07 |
| P01871    | Immunoglo  | 40 | 16 | 46 | 3  | 453  | 49.4  | 6.77 |
| AOA140T9C | Tenascin-  | 17 | 42 | 51 | 42 | 4222 | 455.9 | 5.2  |
| C9JF17    | Apolipoppr | 31 | 7  | 46 | 7  | 215  | 24.1  | 5.6  |
| P05546    | Heparin c  | 37 | 17 | 45 | 17 | 499  | 57    | 6.9  |
| Q7LGC8    | Carbohydr  | 33 | 13 | 42 | 13 | 479  | 54.7  | 8.59 |
| P02765    | Alpha-2-H  | 39 | 9  | 41 | 9  | 367  | 39.3  | 5.72 |
| P08582    | Melanotra  | 46 | 22 | 38 | 22 | 738  | 80.2  | 5.94 |
| Q6P528    | ASPN prot  | 41 | 15 | 44 | 15 | 384  | 43.9  | 6.48 |
| Q9UNU2    | Complemen  | 44 | 12 | 40 | 2  | 354  | 38.1  | 8.53 |
| A4D1W7    | Inhibin,   | 40 | 19 | 37 | 19 | 426  | 47.4  | 8.03 |
| P21333    | Filamin-A  | 20 | 39 | 45 | 36 | 2647 | 280.6 | 6.06 |
| V9HWB4    | Epididymi  | 45 | 26 | 42 | 23 | 654  | 72.3  | 5.16 |
| Q6FHV6    | ENO2 prot  | 36 | 10 | 37 | 7  | 434  | 47.2  | 5.03 |
| P35442    | Thrombosp  | 26 | 24 | 39 | 21 | 1172 | 129.9 | 4.83 |
| P10643    | Complemen  | 34 | 24 | 39 | 3  | 843  | 93.5  | 6.48 |
| A4QPBO    | IQ motif   | 24 | 34 | 41 | 33 | 1657 | 189.2 | 6.48 |
| H6VRF8    | Keratin 1  | 34 | 24 | 42 | 19 | 644  | 66    | 8.12 |
| V9HWN7    | Fructose-  | 58 | 18 | 38 | 16 | 364  | 39.4  | 8.09 |
| H7COL5    | Inter-alp  | 29 | 17 | 43 | 1  | 719  | 80    | 5.45 |
| P08294    | Extracell  | 37 | 7  | 36 | 7  | 240  | 25.8  | 6.61 |
| D3DT72    | Collagen,  | 13 | 19 | 41 | 18 | 1818 | 182.3 | 6    |
| P32119    | Peroxired  | 54 | 10 | 37 | 9  | 198  | 21.9  | 5.97 |

|           |           |    |    |    |    |      |       |      |
|-----------|-----------|----|----|----|----|------|-------|------|
| B2R6W1    | cDNA, FLJ | 32 | 22 | 37 | 1  | 843  | 93.5  | 6.48 |
| B4DPQ0    | Complemen | 34 | 18 | 39 | 17 | 719  | 81.8  | 6.37 |
| Q9NQ79    | Cartilage | 33 | 19 | 34 | 19 | 661  | 71.4  | 5.12 |
| Q86TT1    | Full-leng | 41 | 14 | 41 | 1  | 375  | 41.2  | 6.79 |
| Q9BYJ0    | Fibroblas | 47 | 7  | 36 | 7  | 223  | 24.6  | 8.87 |
| P98066    | Tumor nec | 47 | 10 | 38 | 10 | 277  | 31.2  | 6.79 |
| P13671    | Complemen | 23 | 20 | 32 | 20 | 934  | 104.7 | 6.76 |
| P16157    | Ankyrin-1 | 17 | 26 | 37 | 26 | 1881 | 206.1 | 6.01 |
| W0UV28    | Ribonucle | 59 | 9  | 33 | 9  | 147  | 16.5  | 9.64 |
| Q6MZK8    | Uncharact | 8  | 18 | 39 | 1  | 2060 | 226.3 | 4.44 |
| AOA024R8S | Protein d | 48 | 22 | 38 | 22 | 508  | 57.1  | 4.87 |
| Q86Y38    | Xylosyltr | 22 | 20 | 39 | 20 | 959  | 107.5 | 9.22 |
| S6C4S0    | IgG H cha | 16 | 4  | 37 | 1  | 275  | 29.4  | 8.16 |
| P30043    | Flavin re | 61 | 9  | 38 | 9  | 206  | 22.1  | 7.65 |
| P02649    | Apolipopr | 66 | 21 | 40 | 21 | 317  | 36.1  | 5.73 |
| Q5UGI6    | Serine/cy | 37 | 12 | 35 | 12 | 333  | 37.3  | 8    |
| P08254    | Stromelys | 36 | 20 | 40 | 16 | 477  | 53.9  | 6.16 |
| O43854    | EGF-like  | 34 | 19 | 40 | 19 | 480  | 53.7  | 7.28 |
| P04003    | C4b-bindi | 36 | 19 | 36 | 19 | 597  | 67    | 7.3  |
| B7ZA94    | cDNA, FLJ | 32 | 18 | 33 | 18 | 539  | 61.3  | 7.74 |
| P18428    | Lipopolys | 27 | 11 | 36 | 11 | 481  | 53.4  | 6.7  |
| V9HWP2    | Epididymi | 33 | 25 | 38 | 24 | 803  | 92.4  | 4.84 |
| P02452    | Collagen  | 17 | 22 | 44 | 7  | 1464 | 138.9 | 5.8  |
| A5YM51    | MYH7 prot | 18 | 27 | 39 | 20 | 1934 | 222.9 | 5.8  |
| P35908    | Keratin,  | 32 | 19 | 31 | 11 | 639  | 65.4  | 8    |
| V9HW22    | Epididymi | 37 | 24 | 34 | 11 | 646  | 70.9  | 5.52 |
| P23142    | Fibulin-1 | 32 | 17 | 32 | 7  | 703  | 77.2  | 5.22 |
| AOA024R69 | Actinin,  | 42 | 29 | 32 | 20 | 892  | 103   | 5.41 |
| P02743    | Serum amy | 33 | 8  | 37 | 8  | 223  | 25.4  | 6.54 |
| Q13217    | DnaJ homc | 37 | 19 | 37 | 19 | 504  | 57.5  | 6.15 |
| AOA3B3ITK | Phosphogl | 29 | 17 | 33 | 17 | 584  | 63.9  | 6.76 |
| B3KQT9    | Protein d | 46 | 20 | 35 | 17 | 480  | 54.1  | 7.21 |
| P83110    | Serine pr | 27 | 12 | 33 | 12 | 453  | 48.6  | 7.09 |
| Q6IPT9    | Elongatio | 37 | 14 | 31 | 14 | 462  | 50.2  | 9.07 |
| V9HWF6    | Alpha-1-a | 40 | 7  | 28 | 5  | 201  | 23.5  | 5.02 |
| Q15149    | Plectin C | 8  | 38 | 39 | 38 | 4684 | 531.5 | 5.96 |
| Q86UD1    | Out at fi | 40 | 8  | 26 | 8  | 273  | 30.7  | 6.84 |
| Q562R1    | Beta-acti | 17 | 5  | 31 | 1  | 376  | 42    | 5.59 |
| AOA384MDR | Ferritin  | 58 | 10 | 27 | 10 | 175  | 20    | 5.78 |
| Q6NUR7    | Ezrin OS= | 31 | 20 | 32 | 9  | 586  | 69.2  | 6.27 |
| P13929    | Beta-enol | 16 | 5  | 27 | 1  | 434  | 47    | 7.71 |
| AOA0S2Z2Z | Annexin ( | 34 | 23 | 34 | 23 | 673  | 75.8  | 5.6  |
| B7Z8B6    | cDNA FLJ5 | 22 | 9  | 24 | 2  | 623  | 69.5  | 6.16 |
| P03952    | Plasma ka | 39 | 23 | 33 | 23 | 638  | 71.3  | 8.22 |
| P43652    | Afamin OS | 36 | 20 | 31 | 20 | 599  | 69    | 5.9  |
| Q3SX92    | C-type le | 55 | 12 | 31 | 12 | 197  | 22.2  | 8.84 |
| AOA0G2JIW | Heat shoc | 36 | 19 | 31 | 15 | 642  | 70.1  | 5.66 |
| Q92626    | Peroxidas | 18 | 21 | 28 | 21 | 1479 | 165.2 | 7.17 |
| P09525    | Annexin A | 54 | 17 | 28 | 17 | 319  | 35.9  | 6.13 |
| Q53GZ8    | Complemen | 35 | 22 | 31 | 5  | 752  | 83.3  | 7.52 |
| B7Z1K5    | Tubulin a | 40 | 15 | 25 | 4  | 519  | 57.7  | 5.07 |

|            |            |    |    |    |    |      |       |      |
|------------|------------|----|----|----|----|------|-------|------|
| P27169     | Serum par  | 37 | 9  | 28 | 9  | 355  | 39.7  | 5.22 |
| BOAZL7     | cDNA, FLJ  | 29 | 14 | 26 | 14 | 605  | 66    | 6.79 |
| V9GYM3     | Apolipopr  | 31 | 5  | 23 | 5  | 133  | 14.9  | 8.27 |
| P35555     | Fibrillin  | 11 | 29 | 32 | 28 | 2871 | 312.1 | 4.93 |
| Q53XB4     | Epididymi  | 54 | 9  | 26 | 9  | 147  | 16.8  | 9.03 |
| Q5VY30     | Retinol-b  | 67 | 9  | 27 | 9  | 199  | 23    | 6.09 |
| B2R582     | cDNA, FLJ  | 72 | 12 | 27 | 1  | 202  | 22.5  | 6.04 |
| B4DLV7     | Rab GDP d  | 51 | 18 | 25 | 13 | 449  | 51.1  | 8.18 |
| Q15198     | Platelet-  | 37 | 10 | 26 | 10 | 375  | 41.8  | 8.5  |
| P68366     | Tubulin a  | 47 | 16 | 26 | 5  | 448  | 49.9  | 5.06 |
| AOA024R9H  | Matrilin   | 19 | 14 | 26 | 14 | 941  | 104.9 | 6.35 |
| Q2TUW9     | Lactoferr  | 37 | 20 | 27 | 2  | 709  | 77.9  | 8.12 |
| Q9Y6C2     | EMILIN-1   | 24 | 19 | 25 | 19 | 1016 | 106.6 | 5.17 |
| AOA087WVQ  | Clathrin   | 17 | 22 | 25 | 22 | 1679 | 191.9 | 5.69 |
| AOA024R96  | Chitinase  | 40 | 12 | 22 | 12 | 383  | 42.6  | 8.46 |
| P02008     | Hemoglobi  | 30 | 4  | 36 | 3  | 142  | 15.6  | 8.21 |
| P05452     | Tetranect  | 72 | 12 | 25 | 1  | 202  | 22.5  | 5.67 |
| A2RRP8     | Matrilin   | 34 | 17 | 28 | 16 | 581  | 64    | 5.81 |
| AOA024QZNV | Vinculin,  | 23 | 23 | 29 | 23 | 1066 | 116.6 | 6.09 |
| AOA5C2GME  | IG c622_h  | 26 | 3  | 23 | 1  | 141  | 15.4  | 8.87 |
| Q5EK51     | Lactoferr  | 35 | 19 | 26 | 1  | 711  | 78.3  | 8.18 |
| AOA024RD8  | Heat shoc  | 22 | 16 | 27 | 8  | 724  | 83.2  | 5.03 |
| Q9H4F8     | SPARC-rel  | 32 | 15 | 30 | 15 | 434  | 48.1  | 8.22 |
| Q16674     | Melanoma-  | 35 | 4  | 26 | 4  | 131  | 14.5  | 8.79 |
| Q6FHU2     | Phosphogl  | 55 | 13 | 23 | 13 | 254  | 28.8  | 7.18 |
| Q9Y240     | C-type le  | 37 | 11 | 27 | 11 | 323  | 35.7  | 5.16 |
| AOA024R6R  | Matrix me  | 32 | 16 | 25 | 15 | 660  | 73.8  | 5.47 |
| MOR0Q9     | Complemen  | 68 | 5  | 26 | 1  | 101  | 11.1  | 4.77 |
| AOA024RAE  | Adiponect  | 30 | 7  | 24 | 1  | 253  | 26.7  | 8.63 |
| Q96PD5     | N-acetyl m | 26 | 9  | 23 | 9  | 576  | 62.2  | 7.55 |
| P22314     | Ubiquitin  | 20 | 17 | 24 | 17 | 1058 | 117.8 | 5.76 |
| AOA1W2PNW  | Vascular   | 25 | 20 | 31 | 20 | 665  | 74.9  | 9.22 |
| AOA140VJIT | Testicula  | 33 | 15 | 24 | 15 | 540  | 60.6  | 6.71 |
| AOA0A0MSV  | Complemen  | 24 | 7  | 24 | 1  | 228  | 24    | 9.16 |
| AOA0S2Z3V  | EGF conta  | 36 | 11 | 22 | 11 | 413  | 45.7  | 5.47 |
| P13647     | Keratin,   | 33 | 20 | 28 | 2  | 590  | 62.3  | 7.74 |
| V9HWE9     | Epididymi  | 64 | 11 | 21 | 11 | 210  | 23.3  | 5.64 |
| Q14767     | Latent-tr  | 11 | 18 | 25 | 18 | 1821 | 194.9 | 5.19 |
| P05156     | Complemen  | 28 | 14 | 22 | 6  | 583  | 65.7  | 7.5  |
| AOA2R8Y5S  | Radixin C  | 28 | 18 | 28 | 6  | 590  | 69.3  | 6.27 |
| Q13228     | Methaneth  | 37 | 14 | 23 | 14 | 472  | 52.4  | 6.37 |
| P07357     | Complemen  | 28 | 12 | 23 | 12 | 584  | 65.1  | 6.47 |
| P05023     | Sodium/po  | 23 | 20 | 25 | 18 | 1023 | 112.8 | 5.49 |
| P31415     | Calseques  | 18 | 3  | 16 | 3  | 396  | 45.1  | 4.16 |
| AOA1BOGVE  | Cathepsin  | 37 | 12 | 22 | 12 | 409  | 44.2  | 6.54 |
| P13639     | Elongatio  | 25 | 20 | 26 | 20 | 858  | 95.3  | 6.83 |
| P06737     | Glycogen   | 21 | 18 | 25 | 14 | 847  | 97.1  | 7.17 |
| P54652     | Heat shoc  | 27 | 17 | 25 | 4  | 639  | 70    | 5.74 |
| Q07507     | Dermatopo  | 42 | 6  | 22 | 6  | 201  | 24    | 4.82 |
| B2RBH2     | cDNA, FLJ  | 30 | 14 | 23 | 14 | 574  | 63.4  | 7.03 |
| AOA024QYT  | Serpin pe  | 38 | 12 | 21 | 12 | 402  | 45    | 7.2  |

|           |           |    |    |    |    |      |       |       |
|-----------|-----------|----|----|----|----|------|-------|-------|
| B4E1T1    | cDNA FLJ5 | 33 | 19 | 27 | 0  | 555  | 58.8  | 5.97  |
| AOA087XOK | Collagen  | 9  | 11 | 24 | 11 | 1374 | 140   | 4.98  |
| D3DTX7    | Collagen, | 22 | 16 | 24 | 2  | 885  | 84.7  | 6.24  |
| P01033    | Metallopr | 40 | 6  | 23 | 6  | 207  | 23.2  | 8.1   |
| AOA024R1T | ATP-citra | 20 | 21 | 26 | 21 | 1101 | 120.8 | 7.33  |
| B1AKG0    | Complemen | 30 | 9  | 23 | 1  | 271  | 30.8  | 7.81  |
| D0PNI1    | Epididymi | 51 | 13 | 22 | 10 | 245  | 27.7  | 4.79  |
| B4DJ30    | cDNA FLJ6 | 15 | 16 | 22 | 16 | 995  | 112.9 | 6.06  |
| P21980    | Protein-g | 25 | 15 | 22 | 15 | 687  | 77.3  | 5.22  |
| Q4ZHG4    | Fibronect | 11 | 17 | 22 | 17 | 1894 | 205.4 | 9.32  |
| AOA3B3IRX | Phospholi | 50 | 7  | 26 | 7  | 117  | 13    | 9.06  |
| B2ZZ86    | Collagen  | 7  | 11 | 21 | 10 | 1838 | 183.5 | 5.06  |
| P30041    | Peroxired | 46 | 11 | 23 | 11 | 224  | 25    | 6.38  |
| Q9NT22    | EMILIN-3  | 24 | 14 | 22 | 14 | 766  | 82.6  | 7.72  |
| V9HW21    | Epididymi | 58 | 11 | 22 | 11 | 260  | 29.2  | 7.4   |
| Q01813    | ATP-depen | 24 | 15 | 21 | 13 | 784  | 85.5  | 7.55  |
| A8K491    | cDNA FLJ7 | 30 | 12 | 21 | 12 | 486  | 52.8  | 6.7   |
| Q99985    | Semaphori | 17 | 12 | 23 | 12 | 751  | 85.2  | 8.69  |
| Q6LDQ3    | Sulfated  | 32 | 4  | 28 | 1  | 66   | 7.8   | 5.31  |
| E7EUC7    | UTP--gluc | 29 | 14 | 20 | 14 | 517  | 57.8  | 8.13  |
| AOA0S2Z3G | Actinin a | 24 | 17 | 19 | 10 | 911  | 104.8 | 5.44  |
| K9JA46    | Epididymi | 22 | 15 | 21 | 8  | 732  | 84.6  | 5.02  |
| F1TOG3    | HHIP-like | 22 | 14 | 19 | 3  | 782  | 86.7  | 7.58  |
| Q2HIZ0    | Thrombosp | 17 | 14 | 21 | 12 | 956  | 104.1 | 4.65  |
| AOA140G96 | Alpha-cry | 51 | 7  | 19 | 7  | 168  | 19.3  | 7.72  |
| P04259    | Keratin,  | 25 | 15 | 21 | 3  | 564  | 60    | 8     |
| Q59F12    | Protein 4 | 25 | 15 | 19 | 15 | 827  | 92.1  | 5.55  |
| P07360    | Complemen | 58 | 10 | 18 | 10 | 202  | 22.3  | 8.31  |
| Q05707    | Collagen  | 13 | 18 | 19 | 18 | 1796 | 193.4 | 5.3   |
| J3QTR3    | Ubiquitin | 50 | 6  | 22 | 6  | 106  | 12.2  | 10.14 |
| P11216    | Glycogen  | 24 | 18 | 21 | 14 | 843  | 96.6  | 6.86  |
| AOA140VKC | Testicula | 46 | 12 | 21 | 12 | 298  | 34.2  | 6.05  |
| Q86U78    | Angiotens | 17 | 7  | 18 | 7  | 485  | 53.1  | 6.32  |
| Q6FHW3    | DF protei | 57 | 10 | 16 | 10 | 228  | 24.4  | 7.24  |
| Q15782    | Chitinase | 31 | 10 | 16 | 10 | 390  | 43.5  | 7.53  |
| Q06830    | Peroxired | 51 | 9  | 21 | 6  | 199  | 22.1  | 8.13  |
| AOA024RAA | Adiponect | 25 | 5  | 15 | 5  | 245  | 25.8  | 8.41  |
| B4DUV1    | Fibulin-1 | 29 | 13 | 18 | 3  | 641  | 70.1  | 5.26  |
| PODOX2    | Immunoglo | 29 | 11 | 18 | 1  | 455  | 48.9  | 6.67  |
| Q06033    | Inter-alp | 18 | 14 | 21 | 14 | 890  | 99.8  | 5.74  |
| Q9UKX2    | Myosin-2  | 10 | 14 | 22 | 2  | 1941 | 222.9 | 5.82  |
| Q53GY0    | Plastin 3 | 27 | 15 | 20 | 9  | 630  | 70.7  | 5.68  |
| P04217    | Alpha-1B- | 29 | 10 | 16 | 10 | 495  | 54.2  | 5.86  |
| P29401    | Transketo | 30 | 14 | 17 | 14 | 623  | 67.8  | 7.66  |
| P00441    | Superoxid | 47 | 9  | 20 | 9  | 154  | 15.9  | 6.13  |
| B2R4R0    | Histone H | 51 | 6  | 19 | 6  | 103  | 11.4  | 11.36 |
| Q14112    | Nidogen-2 | 11 | 12 | 19 | 11 | 1375 | 151.2 | 5.29  |
| B2R9K6    | cDNA, FLJ | 31 | 9  | 19 | 9  | 345  | 39    | 6.14  |
| Q8NFL0    | UDP-GlcNA | 28 | 10 | 18 | 10 | 401  | 46    | 9.03  |
| P61204    | ADP-ribos | 47 | 7  | 19 | 4  | 181  | 20.6  | 7.43  |
| Q6N091    | Uncharact | 24 | 10 | 17 | 1  | 500  | 54.1  | 6.34  |

|                    |           |    |    |    |    |      |       |       |
|--------------------|-----------|----|----|----|----|------|-------|-------|
| 075462             | Cytokine  | 33 | 12 | 20 | 12 | 422  | 46.3  | 9.11  |
| Q6N041             | Uncharact | 23 | 10 | 21 | 0  | 498  | 54.1  | 7.18  |
| V9HWC6             | Peptidyl- | 45 | 11 | 19 | 11 | 208  | 22.7  | 9.32  |
| B4DK93             | cDNA FLJ5 | 26 | 15 | 19 | 15 | 677  | 77.4  | 5.5   |
| AOA5F9ZHML-lactate |           | 35 | 11 | 19 | 10 | 341  | 37.4  | 6.25  |
| Q5M8T4             | Connectiv | 36 | 12 | 22 | 12 | 349  | 38    | 7.94  |
| V9HWC1             | Epididymi | 9  | 13 | 21 | 1  | 1939 | 223   | 5.74  |
| P12259             | Coagulati | 9  | 19 | 20 | 19 | 2224 | 251.5 | 6.05  |
| AOA024R8VTIMP meta |           | 41 | 8  | 16 | 8  | 179  | 20.2  | 7.17  |
| P08697             | Alpha-2-a | 20 | 8  | 17 | 8  | 491  | 54.5  | 6.29  |
| P09972             | Fructose- | 26 | 7  | 14 | 5  | 364  | 39.4  | 6.87  |
| P67936             | Tropomyos | 48 | 16 | 20 | 1  | 248  | 28.5  | 4.69  |
| Q6IAW5             | CALU prot | 35 | 10 | 15 | 2  | 315  | 37.1  | 4.64  |
| Q9H3U7             | SPARC-rel | 28 | 12 | 19 | 12 | 446  | 49.6  | 8.46  |
| B2RA39             | cDNA, FLJ | 24 | 13 | 16 | 12 | 569  | 64.3  | 7.06  |
| AOA2R8Y5VTropomyos |           | 50 | 16 | 20 | 1  | 248  | 28.6  | 4.7   |
| AOA1U9X8YChloride  |           | 54 | 11 | 18 | 11 | 240  | 26.8  | 5.26  |
| P58215             | Lysyl oxi | 27 | 14 | 16 | 14 | 753  | 83.1  | 6.86  |
| AOA384NYITubulin b |           | 27 | 9  | 18 | 2  | 442  | 49.4  | 4.89  |
| B1AP13             | Complemen | 25 | 12 | 19 | 12 | 444  | 49.3  | 8.82  |
| P55072             | Transitio | 21 | 16 | 18 | 16 | 806  | 89.3  | 5.26  |
| Q59FR8             | Galectin  | 36 | 9  | 18 | 9  | 258  | 27.1  | 8.41  |
| P04275             | von Wille | 6  | 15 | 18 | 15 | 2813 | 309.1 | 5.48  |
| Q9NRR1             | Cytokine- | 49 | 7  | 18 | 7  | 136  | 15.6  | 8.48  |
| AOAOS2Z3XRab GDP d |           | 35 | 12 | 16 | 7  | 447  | 50.6  | 5.14  |
| P18085             | ADP-ribos | 57 | 9  | 16 | 6  | 180  | 20.5  | 7.14  |
| Q6UXX5             | Inter-alp | 10 | 12 | 18 | 12 | 1313 | 143.1 | 9.01  |
| AOA090N8YProtein d |           | 27 | 13 | 17 | 13 | 645  | 72.9  | 5.07  |
| Q16658             | Fascin OS | 34 | 13 | 17 | 13 | 493  | 54.5  | 7.24  |
| P13674             | Prolyl 4- | 32 | 14 | 17 | 14 | 534  | 61    | 6.01  |
| P36980             | Complemen | 32 | 8  | 14 | 5  | 270  | 30.6  | 6.38  |
| Q16778             | Histone H | 44 | 7  | 18 | 2  | 126  | 13.9  | 10.32 |
| Q9H2X0             | Chordin C | 16 | 12 | 17 | 12 | 955  | 102   | 7.75  |
| Q5QNW6             | Histone H | 44 | 7  | 18 | 2  | 126  | 13.9  | 10.32 |
| G9K389             | YWHAE/FAM | 30 | 10 | 17 | 8  | 384  | 41.3  | 4.97  |
| AOA024R75Calumenin |           | 34 | 10 | 14 | 2  | 315  | 37.1  | 4.59  |
| Q8N7G1             | Purine nu | 41 | 9  | 13 | 9  | 293  | 32.5  | 7.21  |
| Q96RW7             | Hemicenti | 4  | 17 | 17 | 17 | 5635 | 613   | 6.49  |
| P62937             | Peptidyl- | 63 | 10 | 20 | 10 | 165  | 18    | 7.81  |
| P03973             | Antileuko | 45 | 8  | 18 | 8  | 132  | 14.3  | 8.75  |
| B2R7N9             | cDNA, FLJ | 14 | 6  | 15 | 6  | 421  | 49.4  | 5.52  |
| X6RJP6             | Transgeli | 73 | 10 | 16 | 10 | 187  | 21.1  | 7.81  |
| Q6FGX9             | Adenylate | 48 | 9  | 17 | 9  | 194  | 21.6  | 8.63  |
| F1TOG2             | HHIP-like | 20 | 12 | 15 | 1  | 665  | 73.7  | 8.09  |
| H3BTH8             | Hyalurona | 19 | 7  | 16 | 5  | 422  | 47.7  | 6.68  |
| L7RXH0             | Integrin, | 12 | 13 | 16 | 13 | 1048 | 116   | 5.68  |
| B7Z4T2             | 2-phospho | 19 | 9  | 15 | 9  | 442  | 51    | 8.78  |
| Q86UX2             | Inter-alp | 16 | 14 | 17 | 14 | 942  | 104.5 | 8.28  |
| P06744             | Glucose-6 | 23 | 12 | 15 | 12 | 558  | 63.1  | 8.32  |
| Q02388             | Collagen  | 6  | 13 | 15 | 13 | 2944 | 295   | 6.27  |
| B4DX53             | cDNA FLJ5 | 12 | 4  | 16 | 4  | 387  | 42.4  | 7.47  |

|           |            |    |    |    |    |      |       |      |
|-----------|------------|----|----|----|----|------|-------|------|
| P06702    | Protein S  | 70 | 7  | 13 | 7  | 114  | 13.2  | 6.13 |
| Q9Y4K0    | Lysyl oxi  | 19 | 11 | 14 | 11 | 774  | 86.7  | 6.38 |
| Q9BY76    | Angiopoie  | 20 | 7  | 14 | 7  | 406  | 45.2  | 8.85 |
| P07737    | Profilin-  | 59 | 7  | 14 | 7  | 140  | 15    | 8.27 |
| AOA140VJR | Phosphogl  | 13 | 5  | 14 | 1  | 417  | 44.8  | 8.54 |
| AOA5C2G5T | IGL c3037  | 64 | 5  | 12 | 1  | 109  | 11.9  | 7.96 |
| P05109    | Protein S  | 57 | 8  | 15 | 8  | 93   | 10.8  | 7.03 |
| Q6LAM1    | Heavy cha  | 29 | 9  | 13 | 1  | 321  | 35.9  | 7.59 |
| E9PK25    | Cofilin-1  | 47 | 11 | 15 | 9  | 204  | 22.7  | 8.34 |
| P19021    | Peptidyl-  | 13 | 10 | 14 | 10 | 973  | 108.3 | 6.42 |
| AOA384MR2 | Galectin   | 59 | 8  | 15 | 8  | 135  | 14.7  | 5.5  |
| P25705    | ATP synth  | 24 | 12 | 13 | 12 | 553  | 59.7  | 9.13 |
| P21796    | Voltage-d  | 41 | 9  | 14 | 8  | 283  | 30.8  | 8.54 |
| AOA1I9LHJ | Sulfotran  | 19 | 7  | 15 | 7  | 395  | 44    | 9.98 |
| AOA146E5L | Mesenchym  | 19 | 7  | 14 | 7  | 428  | 46    | 5.15 |
| Q5TCU3    | Tropomyos  | 37 | 14 | 18 | 1  | 284  | 32.8  | 4.68 |
| P27348    | 14-3-3 pr  | 43 | 9  | 14 | 5  | 245  | 27.7  | 4.78 |
| Q4W5L2    | Alpha-syn  | 78 | 7  | 12 | 7  | 102  | 10.2  | 9.52 |
| E7ETU9    | Procollag  | 19 | 12 | 15 | 12 | 703  | 81.1  | 6.65 |
| B5MDF5    | GTP-bindi  | 23 | 5  | 12 | 5  | 233  | 26.2  | 7.01 |
| AOA5C2G6C | IGL c3345  | 56 | 4  | 11 | 1  | 108  | 11.7  | 8.48 |
| Q96IY4    | Carboxype  | 16 | 7  | 15 | 7  | 423  | 48.4  | 7.71 |
| Q53ET2    | Dihydropy  | 24 | 10 | 13 | 7  | 572  | 62.2  | 6.32 |
| E9PLD0    | Ras-relat  | 52 | 7  | 12 | 2  | 169  | 18.5  | 5.72 |
| P07951    | Tropomyos  | 37 | 14 | 18 | 1  | 284  | 32.8  | 4.7  |
| Q0QEN7    | ATP synth  | 28 | 9  | 12 | 9  | 445  | 48.1  | 5.07 |
| AOA5C2GRN | IG c1553_  | 59 | 6  | 14 | 2  | 116  | 12.9  | 8.5  |
| Q53FA4    | Cysteine-  | 23 | 9  | 14 | 4  | 381  | 42    | 8.31 |
| J3KPD9    | NME1-NME2  | 51 | 8  | 16 | 8  | 197  | 22.4  | 9.54 |
| LOR849    | Alternati  | 13 | 8  | 19 | 1  | 388  | 42.3  | 5.92 |
| AOA5C2FX9 | IGL c1234  | 47 | 4  | 11 | 2  | 108  | 11.7  | 7.97 |
| P30044    | Peroxired  | 48 | 7  | 11 | 7  | 214  | 22.1  | 8.7  |
| P06732    | Creatine   | 33 | 10 | 13 | 9  | 381  | 43.1  | 7.25 |
| P50454    | Serpin H1  | 29 | 9  | 13 | 9  | 418  | 46.4  | 8.69 |
| P43026    | Growth/di  | 19 | 8  | 13 | 8  | 501  | 55.4  | 9.79 |
| Q10471    | Polypepti  | 21 | 12 | 14 | 12 | 571  | 64.7  | 8.35 |
| P19652    | Alpha-1-a  | 33 | 6  | 12 | 4  | 201  | 23.6  | 5.11 |
| Q14766    | Latent-tr  | 8  | 12 | 14 | 4  | 1721 | 186.7 | 5.96 |
| Q96D15    | Reticuloc  | 23 | 6  | 12 | 6  | 328  | 37.5  | 4.89 |
| D9YZV5    | Tropomyos  | 31 | 12 | 16 | 5  | 284  | 32.9  | 4.78 |
| Q9Y6U3    | Adseverin  | 18 | 13 | 16 | 13 | 715  | 80.4  | 5.71 |
| P07225    | Vitamin K  | 14 | 9  | 14 | 9  | 676  | 75.1  | 5.67 |
| Q5U0I6    | H. sapiens | 39 | 6  | 11 | 1  | 205  | 22.7  | 6.21 |
| AOA0X9USM | GCT-A4 he  | 54 | 5  | 12 | 1  | 128  | 14.3  | 7.28 |
| MILAK4    | Olfactome  | 38 | 13 | 15 | 13 | 406  | 46    | 6.57 |
| AOA5C2GMV | IG c1068_  | 41 | 3  | 10 | 1  | 108  | 11.7  | 7.97 |
| A1L4H1    | Soluble s  | 13 | 13 | 13 | 13 | 1573 | 165.6 | 6.13 |
| AOA5C2GQW | IG c31_he  | 63 | 6  | 10 | 2  | 118  | 12.7  | 8.46 |
| Q6NS36    | Ferritin   | 39 | 7  | 11 | 7  | 232  | 26.2  | 6.52 |
| Q53G71    | Calreticu  | 37 | 10 | 16 | 10 | 406  | 46.9  | 4.45 |
| P16452    | Erythrocy  | 19 | 13 | 14 | 13 | 691  | 77    | 8.09 |



|           |           |    |    |    |    |      |       |      |
|-----------|-----------|----|----|----|----|------|-------|------|
| AOA1S5UZH | Semaphori | 17 | 9  | 12 | 9  | 783  | 86.5  | 8.73 |
| B7Z8A2    | cDNA FLJ5 | 21 | 9  | 12 | 9  | 487  | 54.5  | 5.73 |
| AOA384NPU | Epididymi | 26 | 8  | 11 | 8  | 440  | 48.1  | 5.08 |
| V9HWC2    | Epididymi | 50 | 9  | 11 | 9  | 189  | 19.9  | 6.79 |
| D9ZGF6    | Frizzled- | 19 | 6  | 11 | 6  | 325  | 36.2  | 8.46 |
| P00742    | Coagulati | 14 | 7  | 11 | 7  | 488  | 54.7  | 5.94 |
| AOA5C2GNE | IG c154_h | 32 | 4  | 11 | 2  | 120  | 13.3  | 8.41 |
| Q13885    | Tubulin b | 24 | 8  | 12 | 2  | 445  | 49.9  | 4.89 |
| AOA0S2Z47 | Creatine  | 22 | 7  | 11 | 6  | 405  | 44.9  | 6.11 |
| Q6UWX4    | HHIP-like | 9  | 7  | 13 | 7  | 724  | 80.7  | 9.01 |
| Q99584    | Protein S | 49 | 6  | 12 | 6  | 98   | 11.5  | 6.16 |
| AOA5C2GXV | IG c1447_ | 39 | 4  | 11 | 1  | 124  | 13.6  | 7.12 |
| Q6FGG5    | SCRGl pro | 65 | 4  | 14 | 4  | 98   | 11.1  | 6.71 |
| Q9UBG0    | C-type ma | 10 | 10 | 12 | 10 | 1479 | 166.6 | 5.83 |
| AOA5C2GC7 | IGL c3913 | 50 | 3  | 11 | 0  | 112  | 12.2  | 7.12 |
| P22352    | Glutathio | 38 | 8  | 13 | 8  | 226  | 25.5  | 8.13 |
| P03951    | Coagulati | 19 | 11 | 12 | 11 | 625  | 70.1  | 8.1  |
| P09486    | SPARC OS= | 25 | 8  | 13 | 8  | 303  | 34.6  | 4.84 |
| U5LIG7    | Apolipopr | 27 | 10 | 14 | 10 | 293  | 32.6  | 8.24 |
| B7Z705    | cDNA FLJ5 | 22 | 9  | 12 | 9  | 423  | 48.2  | 7.68 |
| P37837    | Transaldo | 30 | 10 | 12 | 10 | 337  | 37.5  | 6.81 |
| A3KPE2    | Apolipopr | 34 | 3  | 11 | 3  | 99   | 10.8  | 5.41 |
| Q5T7Y6    | Protein S | 15 | 2  | 10 | 2  | 147  | 15.9  | 4.48 |
| V9HWG9    | Epididymi | 39 | 10 | 13 | 10 | 241  | 27.5  | 6.6  |
| Q13162    | Peroxired | 26 | 6  | 12 | 4  | 271  | 30.5  | 6.29 |
| D3DSM4    | Collagen, | 7  | 8  | 12 | 8  | 1336 | 135.4 | 6.47 |
| F2RM35    | Serine pr | 17 | 7  | 11 | 7  | 461  | 51.7  | 5.39 |
| Q6UX71    | Plexin do | 14 | 7  | 13 | 7  | 529  | 59.5  | 6.46 |
| AOA024R32 | Epididymi | 41 | 6  | 10 | 2  | 193  | 21.8  | 6.1  |
| P05164    | Myelopero | 15 | 9  | 12 | 9  | 745  | 83.8  | 8.97 |
| Q86UX7    | Fermitin  | 19 | 10 | 12 | 10 | 667  | 75.9  | 6.98 |
| Q13938    | Calcyphos | 28 | 7  | 11 | 7  | 275  | 30.2  | 6.04 |
| AOA024R1G | Myoglobin | 36 | 6  | 11 | 6  | 166  | 18.5  | 7.55 |
| O15041    | Semaphori | 14 | 10 | 13 | 10 | 775  | 89.2  | 7.47 |
| Q5T619    | Zinc fing | 2  | 1  | 14 | 1  | 568  | 62.3  | 8.62 |
| P33908    | Mannosyl- | 13 | 8  | 11 | 8  | 653  | 72.9  | 6.47 |
| AOA0S2Z4I | Tropomyos | 39 | 11 | 15 | 4  | 248  | 28.9  | 4.75 |
| Q59E93    | Aminopept | 11 | 10 | 12 | 10 | 977  | 110.5 | 5.53 |
| P13489    | Ribonucle | 26 | 9  | 10 | 9  | 461  | 49.9  | 4.82 |
| Q86VP6    | Cullin-as | 9  | 11 | 12 | 11 | 1230 | 136.3 | 5.78 |
| P40925    | Malate de | 30 | 10 | 11 | 10 | 334  | 36.4  | 7.36 |
| P26447    | Protein S | 36 | 4  | 14 | 4  | 101  | 11.7  | 6.11 |
| AOA5C2G71 | IGH c427_ | 45 | 5  | 9  | 1  | 121  | 13.4  | 7.12 |
| O43866    | CD5 antig | 35 | 9  | 11 | 9  | 347  | 38.1  | 5.47 |
| V9HVX6    | Epididymi | 30 | 12 | 14 | 12 | 501  | 54.8  | 6.92 |
| P02461    | Collagen  | 6  | 8  | 11 | 8  | 1466 | 138.5 | 6.61 |
| P55058    | Phospholi | 16 | 7  | 11 | 7  | 493  | 54.7  | 7.01 |
| P13497    | Bone morp | 10 | 9  | 12 | 7  | 986  | 111.2 | 6.9  |
| Q99645    | Epiphycan | 29 | 7  | 10 | 7  | 322  | 36.6  | 4.81 |
| P04899    | Guanine n | 32 | 9  | 11 | 8  | 355  | 40.4  | 5.54 |
| Q6NUI6    | Chondroad | 13 | 9  | 11 | 9  | 762  | 82.3  | 8.84 |

|                     |    |    |    |    |      |       |       |
|---------------------|----|----|----|----|------|-------|-------|
| AOA5C2GE7IG c662_h  | 41 | 4  | 9  | 1  | 119  | 13    | 5.4   |
| AOA5C2G5LIGL c387C  | 43 | 3  | 7  | 2  | 107  | 11.7  | 5.34  |
| C9J8S2 Retinoic     | 37 | 5  | 8  | 5  | 159  | 17.8  | 10.21 |
| P02654 Apolipopr    | 40 | 7  | 11 | 7  | 83   | 9.3   | 8.47  |
| Q53GN4 WD repeat    | 20 | 10 | 12 | 10 | 606  | 66.1  | 6.65  |
| AOA096LPESAA2-SAA4  | 25 | 6  | 13 | 6  | 208  | 23.3  | 8.98  |
| AOA5C2GUJIG c1195_  | 56 | 4  | 11 | 1  | 112  | 12.1  | 7.12  |
| Q16270 Insulin-1    | 29 | 7  | 9  | 7  | 282  | 29.1  | 7.9   |
| AOA5C2GZTIIG c1909_ | 33 | 2  | 11 | 1  | 112  | 12.2  | 8.03  |
| O60701 UDP-glucc    | 23 | 9  | 11 | 9  | 494  | 55    | 7.12  |
| P31946 14-3-3 pr    | 34 | 8  | 11 | 3  | 246  | 28.1  | 4.83  |
| O43827 Angiopoie    | 28 | 9  | 12 | 9  | 346  | 40    | 7.85  |
| AOA5C2GD1IGL c483_  | 46 | 4  | 10 | 1  | 108  | 11.7  | 7.96  |
| V9HWA3 Epididymi    | 38 | 7  | 12 | 7  | 260  | 29.5  | 7.34  |
| AOA5C2GTXIG c1329_  | 34 | 3  | 10 | 1  | 122  | 13.3  | 8.46  |
| P61981 14-3-3 pr    | 30 | 8  | 11 | 4  | 247  | 28.3  | 4.89  |
| AOA5C2GNYIG c270_h  | 38 | 4  | 9  | 1  | 122  | 13.5  | 6.62  |
| Q05DH1 Proteasom    | 33 | 6  | 9  | 6  | 238  | 26.7  | 8.87  |
| Q8IZZ5 Coagulati    | 18 | 10 | 11 | 10 | 615  | 67.7  | 7.74  |
| P50990 T-complex    | 20 | 10 | 11 | 10 | 548  | 59.6  | 5.6   |
| B2RDW0 cDNA, FLJ    | 38 | 5  | 10 | 4  | 149  | 16.8  | 4.22  |
| AOA5C2GMEIG c324_1  | 43 | 3  | 10 | 1  | 112  | 12.4  | 7.96  |
| P02750 Leucine-r    | 18 | 5  | 9  | 5  | 347  | 38.2  | 6.95  |
| Q8NCHO Carbohydr    | 24 | 9  | 12 | 9  | 376  | 43    | 9.48  |
| A4D2P0 Ras-relat    | 28 | 6  | 10 | 5  | 211  | 23.5  | 8.63  |
| P05997 Collagen     | 6  | 7  | 9  | 5  | 1499 | 144.8 | 6.46  |
| G3V2W1 Protein Z    | 13 | 7  | 13 | 7  | 484  | 55.1  | 7.64  |
| AOA5C2G8YIGL c500_  | 26 | 4  | 11 | 1  | 113  | 12.5  | 7.99  |
| B4E320 cDNA FLJ5    | 15 | 8  | 9  | 8  | 686  | 77.5  | 5.08  |
| AOA5C2GS4IG c1300_  | 31 | 3  | 9  | 1  | 126  | 13.9  | 7.75  |
| AOA5C2GDEIGH + IGL  | 21 | 2  | 8  | 1  | 119  | 13    | 7.96  |
| AOA0K0K1JEpididymi  | 37 | 5  | 8  | 5  | 146  | 15.8  | 8.75  |
| Q9H173 Nucleotid    | 10 | 5  | 10 | 5  | 461  | 52.1  | 5.36  |
| P05388 60S acidi    | 28 | 7  | 9  | 7  | 317  | 34.3  | 5.97  |
| Q59EP1 Annexin (    | 22 | 9  | 9  | 9  | 510  | 54.9  | 7.27  |
| Q8IZ52 Chondroit    | 12 | 9  | 10 | 9  | 775  | 85.4  | 6.93  |
| B2R5U1 Staphyloc    | 11 | 9  | 10 | 9  | 885  | 99.6  | 6.96  |
| Q9UL88 Myosin-re    | 24 | 2  | 8  | 0  | 131  | 14.1  | 9.63  |
| B4DLA1 cDNA FLJ5    | 18 | 9  | 11 | 7  | 533  | 60    | 6.55  |
| C9JIZ6 Prosaposi    | 9  | 5  | 10 | 5  | 527  | 58.4  | 5.17  |
| B2R9K8 cDNA, FLJ    | 20 | 10 | 10 | 10 | 531  | 57.9  | 6.8   |
| Q9UBX1 Cathepsin    | 15 | 8  | 11 | 8  | 484  | 53.3  | 8.22  |
| Q8TB01 Similar t    | 18 | 10 | 11 | 10 | 560  | 62    | 5.68  |
| AOA024R1KTyrosine   | 31 | 8  | 10 | 5  | 246  | 28.2  | 4.84  |
| B4E3Q1 cDNA FLJ6    | 10 | 10 | 11 | 5  | 962  | 107.7 | 4.97  |
| AOA5C2GWEIG c1881_  | 32 | 3  | 7  | 1  | 127  | 13.6  | 5.86  |
| Q9P2E9 Ribosome-    | 18 | 8  | 10 | 8  | 1410 | 152.4 | 8.6   |
| P21926 CD9 antig    | 7  | 3  | 12 | 3  | 228  | 25.4  | 7.15  |
| C9JD84 Latent-tr    | 8  | 9  | 10 | 1  | 1340 | 146.9 | 4.91  |
| AOA5C2GPJIG c1305_  | 32 | 3  | 7  | 1  | 121  | 12.9  | 8.46  |
| B4DID6 cDNA FLJ5    | 29 | 7  | 8  | 7  | 364  | 39.8  | 4.67  |

|                    |           |    |   |    |   |      |       |      |
|--------------------|-----------|----|---|----|---|------|-------|------|
| 075829             | Leukocyte | 15 | 4 | 8  | 4 | 334  | 37.1  | 7.56 |
| Q9BUD6             | Spondin-2 | 18 | 5 | 10 | 5 | 331  | 35.8  | 5.52 |
| P24593             | Insulin-1 | 26 | 7 | 10 | 7 | 272  | 30.6  | 8.21 |
| AOA5C2G9WIGH       | c53_h     | 35 | 3 | 7  | 1 | 117  | 13    | 5.41 |
| AOA5C2GW7IG        | c857_h    | 31 | 3 | 7  | 1 | 127  | 13.9  | 8.41 |
| AOA024RAG          | Adiponect | 18 | 3 | 10 | 3 | 245  | 26    | 9.11 |
| Q8IWU5             | Extracell | 8  | 8 | 11 | 8 | 870  | 100.4 | 9.17 |
| P27824             | Calnexin  | 15 | 7 | 10 | 7 | 592  | 67.5  | 4.6  |
| Q8N6N5             | Tubulin b | 19 | 7 | 12 | 2 | 445  | 49.8  | 4.86 |
| AOA5C2GHQIG        | c46_he    | 20 | 2 | 7  | 1 | 123  | 13.5  | 8.43 |
| V9HWA6             | Epididymi | 48 | 9 | 11 | 8 | 165  | 18.5  | 7.85 |
| Q53FI7             | Four and  | 24 | 6 | 8  | 1 | 280  | 31.9  | 8.22 |
| P30050             | 60S ribos | 64 | 8 | 9  | 8 | 165  | 17.8  | 9.42 |
| Q5U0C3             | RAP1A, me | 26 | 4 | 8  | 1 | 184  | 20.9  | 6.67 |
| AOA5C2GCCIGH       | + IGL     | 25 | 3 | 10 | 1 | 114  | 12.7  | 9.36 |
| B4DWC4             | Chloride  | 25 | 4 | 8  | 4 | 245  | 27.8  | 6.38 |
| AOA5C2G12IGL       | c33_1     | 24 | 3 | 10 | 1 | 112  | 12.2  | 8.91 |
| AOA024RB8RAP1B,    | me        | 26 | 4 | 8  | 1 | 184  | 20.8  | 5.78 |
| AOA5C2GS3IG        | c1723_    | 35 | 3 | 7  | 1 | 116  | 12.5  | 8.5  |
| AOA2U8J97Ig        | heavy     | 23 | 2 | 7  | 1 | 107  | 11.8  | 9.32 |
| AOA024R87Delta-    | ami       | 27 | 7 | 8  | 7 | 339  | 37.2  | 6.84 |
| AOA5C2GXAIG        | c1583_    | 25 | 2 | 9  | 1 | 112  | 12.3  | 6.57 |
| AOA5C2GBWIGH       | + IGL     | 33 | 2 | 9  | 1 | 112  | 12.3  | 7.12 |
| E9PQH6             | Rho-relat | 33 | 5 | 8  | 1 | 169  | 19.2  | 5.1  |
| AOA5C2GLNIG        | c368_1    | 47 | 3 | 8  | 1 | 107  | 11.5  | 7.96 |
| A8K690             | cDNA FLJ7 | 16 | 9 | 9  | 9 | 543  | 62.6  | 6.8  |
| AOA5C2GFMIGH       | + IGL     | 31 | 2 | 6  | 1 | 109  | 12    | 5.06 |
| AOA5C2GCZIGL       | c453_     | 31 | 3 | 7  | 1 | 109  | 12    | 8.94 |
| AOA5C2G5VIGL       | c1753     | 40 | 3 | 8  | 0 | 107  | 11.5  | 8.51 |
| AOA5C2GR5IG        | c1383_    | 43 | 4 | 9  | 1 | 122  | 13.5  | 4.77 |
| Q53EP4             | Dolichyl- | 17 | 9 | 9  | 9 | 607  | 68.5  | 6.38 |
| Q7Z406             | Myosin-14 | 3  | 4 | 7  | 1 | 1995 | 227.7 | 5.6  |
| V9HWH9             | Protein S | 34 | 3 | 7  | 3 | 105  | 11.7  | 7.12 |
| AOA5C2GRNIG        | c291_h    | 24 | 2 | 8  | 1 | 124  | 13.6  | 4.93 |
| AOA140VKCTesticula |           | 14 | 8 | 10 | 5 | 684  | 73.9  | 6.35 |
| AOA5C2GKFIGH       | + IGL     | 39 | 3 | 7  | 2 | 109  | 12    | 6.57 |
| AOA1W6IYJN90-VRC38 |           | 24 | 2 | 7  | 0 | 124  | 13.9  | 8.44 |
| Q15758             | Neutral a | 17 | 7 | 8  | 7 | 541  | 56.6  | 5.48 |
| Q9NS15             | Latent-tr | 6  | 7 | 9  | 7 | 1303 | 139.3 | 6.07 |
| B7Z5V0             | cDNA FLJ5 | 23 | 6 | 8  | 1 | 275  | 31.2  | 8.41 |
| Q16715             | Pyruvate  | 6  | 3 | 8  | 2 | 587  | 63.2  | 7.53 |
| P04844             | Dolichyl- | 15 | 7 | 9  | 7 | 631  | 69.2  | 5.69 |
| B2RCM5             | cDNA, FLJ | 20 | 7 | 9  | 7 | 443  | 49.3  | 4.94 |
| I3L397             | Eukaryoti | 38 | 6 | 7  | 6 | 146  | 16    | 5    |
| AOA5C2GRQIG        | c174_1    | 51 | 4 | 7  | 1 | 108  | 11.7  | 7.97 |
| AOA5C2FYGIGL       | c1216     | 31 | 2 | 7  | 1 | 108  | 11.8  | 8.5  |
| P27918             | Properdin | 20 | 7 | 12 | 7 | 469  | 51.2  | 7.9  |
| AOA5C2GCUIGH       | + IGL     | 25 | 2 | 6  | 1 | 121  | 12.8  | 5.11 |
| P10599             | Thioredox | 40 | 5 | 9  | 5 | 105  | 11.7  | 4.92 |
| AOA024ROFTransform |           | 26 | 8 | 8  | 8 | 390  | 44.3  | 8.53 |
| D3JV41             | C-X-C mot | 39 | 4 | 8  | 4 | 126  | 13.7  | 9    |

|                  |            |    |   |    |   |      |       |      |
|------------------|------------|----|---|----|---|------|-------|------|
| P26927           | Hepatocyt  | 13 | 8 | 9  | 8 | 711  | 80.3  | 7.68 |
| B4DI38           | Adenylyl   | 17 | 7 | 8  | 7 | 452  | 49    | 8.21 |
| AOA5C2GT2IG      | c1854_     | 31 | 3 | 6  | 2 | 124  | 13.4  | 7.96 |
| P60953           | Cell divi  | 19 | 3 | 7  | 2 | 191  | 21.2  | 6.55 |
| AOA5C2GKNIG      | c369_h     | 32 | 3 | 6  | 1 | 117  | 13    | 7.14 |
| AOA5C2GNXIG      | c1125_     | 32 | 2 | 7  | 0 | 115  | 12.7  | 7.12 |
| B3KUR3           | cDNA FLJ4  | 32 | 7 | 9  | 7 | 242  | 28    | 5.85 |
| Q03692           | Collagen   | 5  | 3 | 8  | 3 | 680  | 66.1  | 9.67 |
| O15144           | Actin-rel  | 16 | 5 | 8  | 5 | 300  | 34.3  | 7.36 |
| AOA5C2GV5IG      | c673_1     | 32 | 2 | 5  | 1 | 107  | 11.7  | 6.51 |
| AOA5C2GX3IG      | c258_1     | 32 | 2 | 5  | 1 | 107  | 11.6  | 7.97 |
| P11047           | Laminin s  | 6  | 9 | 10 | 9 | 1609 | 177.5 | 5.12 |
| AOA0X9T7TMS-D3   | hea        | 29 | 3 | 6  | 1 | 134  | 15    | 5.92 |
| P55268           | Laminin s  | 8  | 9 | 9  | 9 | 1798 | 195.9 | 6.52 |
| AOA087X2EBasigin | (          | 29 | 5 | 9  | 5 | 221  | 23.9  | 5.25 |
| Q59GA0           | Thy-1 cel  | 27 | 3 | 7  | 3 | 145  | 15.9  | 9    |
| AOA024QZ3        | Microfibr  | 14 | 2 | 6  | 2 | 279  | 31.1  | 5.66 |
| Q59FV6           | ARP3 acti  | 22 | 6 | 8  | 6 | 369  | 42.2  | 5.87 |
| Q53FS4           | Lectin, m  | 11 | 7 | 9  | 7 | 510  | 57.5  | 6.81 |
| B3KQQ9           | cDNA PSEC  | 19 | 5 | 8  | 5 | 383  | 43    | 9.36 |
| B4DZK8           | cDNA FLJ6  | 21 | 5 | 8  | 5 | 280  | 30.8  | 8.25 |
| P13798           | Acylamino  | 12 | 8 | 11 | 8 | 732  | 81.2  | 5.48 |
| D9IAI1           | Epididymi  | 35 | 5 | 7  | 5 | 187  | 21    | 7.53 |
| AOA5C2FWNIGL     | c1232      | 32 | 2 | 7  | 1 | 107  | 11.2  | 6.54 |
| AOA5C2GEJIG      | c1203_     | 51 | 5 | 7  | 3 | 118  | 12.9  | 7.96 |
| Q641Q3           | Meteorin-  | 27 | 6 | 7  | 6 | 311  | 34.4  | 8.35 |
| AOA5C2GMJIG      | c408_h     | 31 | 3 | 6  | 1 | 121  | 13.4  | 9.2  |
| AOA5C2FWWIGL     | c1521      | 24 | 2 | 5  | 1 | 120  | 13.4  | 8.81 |
| P22626           | Heterogen  | 17 | 5 | 8  | 5 | 353  | 37.4  | 8.95 |
| AOA5C2GNIG       | c294_h     | 35 | 4 | 10 | 1 | 129  | 14.5  | 6.62 |
| AOA5C2GBJIGH     | + IGL      | 36 | 3 | 7  | 1 | 109  | 12    | 8.44 |
| AOA5C2FSYIGL     | c28_1      | 34 | 3 | 8  | 1 | 108  | 11.8  | 6.54 |
| AOA5C2G6YIGL     | c148_      | 13 | 2 | 9  | 2 | 166  | 17.3  | 5.15 |
| B4DUQ1           | cDNA FLJ5  | 22 | 8 | 9  | 8 | 439  | 48.5  | 5.92 |
| Q12841           | Follistat  | 16 | 6 | 8  | 6 | 308  | 35    | 5.52 |
| Q9UK22           | F-box onl  | 17 | 4 | 10 | 4 | 296  | 33.3  | 4.37 |
| A6XND1           | Insulin-1  | 34 | 8 | 8  | 8 | 263  | 29    | 8.46 |
| B2R9F2           | cDNA, FLJ  | 15 | 6 | 8  | 6 | 405  | 45.1  | 6.04 |
| P26572           | Alpha-1, 3 | 20 | 9 | 11 | 9 | 445  | 50.8  | 9.16 |
| AOA494C1A        | Alpha-act  | 12 | 8 | 8  | 1 | 858  | 99.7  | 5.67 |
| AOA5C2GTEIG      | c1109_     | 47 | 5 | 7  | 1 | 125  | 13.9  | 7.11 |
| AOA5C2GRGIG      | c1483_     | 35 | 4 | 12 | 1 | 118  | 13.1  | 8.79 |
| P55774           | C-C motif  | 52 | 3 | 7  | 3 | 89   | 9.8   | 8.75 |
| K7ER74           | APOC4-APC  | 34 | 6 | 7  | 4 | 178  | 20    | 6.64 |
| AOA384NP         | Epididymi  | 18 | 8 | 8  | 8 | 558  | 61.6  | 7.3  |
| AOA5C2GNCIG      | c825_h     | 24 | 2 | 5  | 1 | 124  | 13.6  | 6.52 |
| AOA5C2GHMIG      | c1103_     | 22 | 2 | 5  | 1 | 127  | 14.2  | 8.41 |
| P50502           | Hsc70-int  | 17 | 6 | 8  | 6 | 369  | 41.3  | 5.27 |
| AOA5C2GE1IGH     | + IGL      | 27 | 2 | 5  | 1 | 125  | 13.9  | 5.1  |
| AOA5C2GGVIG      | c324_h     | 23 | 2 | 5  | 1 | 131  | 14.2  | 7.12 |
| Q53RD9           | Fibulin-7  | 15 | 6 | 9  | 6 | 439  | 47.3  | 7.62 |

|                     |    |   |    |   |     |       |       |
|---------------------|----|---|----|---|-----|-------|-------|
| AOA5C2G6KIGL c3297  | 23 | 2 | 5  | 1 | 107 | 11.6  | 8.85  |
| Q59GX2 Solute ca    | 12 | 6 | 8  | 6 | 517 | 57    | 9.47  |
| AOA5C2G3L IGL c3752 | 23 | 2 | 6  | 1 | 113 | 12.5  | 7.12  |
| Q02985 Complemen    | 18 | 5 | 8  | 4 | 330 | 37.3  | 7.55  |
| AOA5C2GKRIGH + IGL  | 35 | 3 | 7  | 1 | 107 | 11.7  | 8.46  |
| AOA024R5ZRAB11A, m  | 28 | 6 | 8  | 6 | 216 | 24.4  | 6.57  |
| AOA5C2GWZIG c1107_  | 30 | 3 | 6  | 1 | 123 | 13.7  | 7.39  |
| AOA5C2GL6IG c1170_  | 50 | 5 | 7  | 1 | 126 | 13.7  | 8.41  |
| Q9UID7 CYR61 pro    | 18 | 6 | 8  | 1 | 334 | 37.2  | 8.1   |
| AOA5C2GA9IGH + IGL  | 35 | 3 | 7  | 0 | 107 | 11.8  | 7.96  |
| Q16695 Histone H    | 29 | 5 | 9  | 5 | 136 | 15.5  | 11.12 |
| AOA5C2G6EIGL c3365  | 47 | 3 | 5  | 1 | 107 | 11.6  | 7.96  |
| AOA5C2GT5IG c1680_  | 50 | 6 | 9  | 1 | 125 | 13.5  | 8.78  |
| AOA5C2G08IGL c1365  | 24 | 2 | 5  | 1 | 107 | 11.6  | 8.85  |
| Q9BVJ8 HEXA prot    | 20 | 8 | 8  | 8 | 409 | 47.1  | 5     |
| AOA5C2GAAIGH c203_  | 26 | 2 | 5  | 1 | 117 | 13    | 8.79  |
| P63244 Receptor     | 21 | 6 | 8  | 6 | 317 | 35.1  | 7.69  |
| AOA5C2GKGIG c571_h  | 24 | 2 | 6  | 1 | 126 | 13.8  | 5.41  |
| Q70JA7 Chondroit    | 8  | 8 | 8  | 8 | 882 | 100.2 | 8.75  |
| P47755 F-actin-c    | 28 | 5 | 7  | 4 | 286 | 32.9  | 5.85  |
| P07858 Cathepsin    | 19 | 5 | 7  | 5 | 339 | 37.8  | 6.3   |
| P48061 Stromal c    | 40 | 4 | 9  | 4 | 93  | 10.7  | 9.88  |
| AOA5C2GP2IG c310_h  | 24 | 2 | 5  | 1 | 123 | 13.3  | 6     |
| B2R7L2 Annexin C    | 14 | 7 | 8  | 7 | 466 | 50.3  | 6.61  |
| AOA5C2GQVIG c1283_  | 25 | 2 | 5  | 1 | 118 | 12.8  | 7.99  |
| Q6WN34 Chordin-1    | 18 | 7 | 8  | 6 | 429 | 47.5  | 7.88  |
| DOPNI2 Lysyl oxi    | 15 | 5 | 7  | 5 | 417 | 46.9  | 8.09  |
| Q4VB24 Histone c    | 26 | 7 | 9  | 4 | 219 | 21.9  | 11.03 |
| AOA5C2GGEIG c695_h  | 40 | 4 | 7  | 1 | 122 | 13.6  | 7.94  |
| AOA024R58Calpain 1  | 11 | 6 | 7  | 6 | 713 | 81.8  | 5.82  |
| H3BPK4 Myosin re    | 23 | 3 | 9  | 3 | 199 | 22    | 5.81  |
| V9HW96 Chaperoni    | 17 | 6 | 6  | 6 | 535 | 57.5  | 6.46  |
| AOA5C2GQYIG c1134_  | 31 | 3 | 6  | 1 | 124 | 13.6  | 7.8   |
| P17858 ATP-depen    | 10 | 7 | 8  | 5 | 780 | 85    | 7.5   |
| B4DUF1 cDNA FLJ5    | 8  | 6 | 8  | 6 | 661 | 75.8  | 6.52  |
| AOA024RAVBranched-  | 15 | 5 | 7  | 5 | 386 | 42.9  | 5.3   |
| P54578 Ubiquitin    | 17 | 7 | 7  | 7 | 494 | 56    | 5.3   |
| AOA5C2GN1IG c842_h  | 43 | 3 | 6  | 1 | 121 | 13.2  | 7.94  |
| B4E2U0 6-phospho    | 18 | 8 | 9  | 3 | 461 | 50.8  | 8.18  |
| AOA5C2GSFIG c819_h  | 36 | 4 | 11 | 0 | 119 | 13.2  | 7.93  |
| P21266 Glutathio    | 29 | 6 | 9  | 5 | 225 | 26.5  | 5.54  |
| P40121 Macrophag    | 18 | 6 | 7  | 6 | 348 | 38.5  | 6.19  |
| AOA068LKR Ig heavy  | 22 | 2 | 5  | 1 | 118 | 12.8  | 6.01  |
| A8K7Q1 cDNA FLJ7    | 14 | 6 | 8  | 6 | 461 | 53.9  | 5.25  |
| B4DWB5 cDNA FLJ5    | 14 | 7 | 9  | 7 | 618 | 70    | 7.33  |
| Q5U0A0 Proteasom    | 30 | 5 | 6  | 5 | 241 | 26.4  | 4.79  |
| AOA140VK4Proteasom  | 22 | 6 | 7  | 6 | 246 | 27.4  | 6.76  |
| AOA024R79Choline t  | 10 | 7 | 9  | 7 | 704 | 79.8  | 8.57  |
| AOA5C2GTSIG c717_1  | 31 | 2 | 5  | 1 | 108 | 11.8  | 8.48  |
| P21246 Pleiotrop    | 22 | 3 | 7  | 3 | 168 | 18.9  | 9.6   |
| O95025 Semaphori    | 11 | 9 | 10 | 9 | 777 | 89.6  | 7.8   |

|                     |           |    |   |   |   |      |       |       |
|---------------------|-----------|----|---|---|---|------|-------|-------|
| P08493              | Matrix Gl | 23 | 2 | 6 | 2 | 103  | 12.3  | 9.67  |
| 000462              | Beta-mann | 7  | 5 | 7 | 5 | 879  | 100.8 | 5.52  |
| AOA5C2GA8IGH c185_  |           | 29 | 3 | 7 | 1 | 120  | 13.4  | 7.12  |
| P18084              | Integrin  | 11 | 8 | 8 | 8 | 799  | 88    | 6.06  |
| AOA2R8YELGlutamate  |           | 10 | 6 | 8 | 6 | 639  | 72.9  | 6.09  |
| E9PRJ8              | Tetraspan | 21 | 3 | 6 | 3 | 209  | 22.5  | 6.15  |
| P06703              | Protein S | 34 | 5 | 9 | 5 | 90   | 10.2  | 5.48  |
| P05556              | Integrin  | 8  | 7 | 8 | 7 | 798  | 88.4  | 5.39  |
| Q8N2S1              | Latent-tr | 5  | 7 | 7 | 7 | 1624 | 173.3 | 5.43  |
| P22061              | Protein-L | 33 | 6 | 7 | 6 | 227  | 24.6  | 7.21  |
| Q6IPN0              | Reticulon | 15 | 4 | 6 | 4 | 343  | 36.9  | 4.81  |
| AOA5C2G2RIGL c2880  |           | 38 | 3 | 5 | 1 | 108  | 11.8  | 7.97  |
| Q9UGM5              | Fetuin-B  | 16 | 6 | 8 | 6 | 382  | 42    | 6.83  |
| P07686              | Beta-hexc | 10 | 5 | 8 | 5 | 556  | 63.1  | 6.76  |
| AOA5C2GHEIG c56_he  |           | 39 | 4 | 7 | 1 | 119  | 13.3  | 6.77  |
| B2R888              | Monocyte  | 18 | 6 | 7 | 6 | 375  | 40    | 6.23  |
| Q9HDC9              | Adipocyte | 13 | 6 | 8 | 6 | 416  | 46.5  | 6.16  |
| Q6PCB0              | von Wille | 11 | 4 | 6 | 4 | 445  | 46.8  | 7.68  |
| Q7Z3Z1              | Myosin li | 22 | 3 | 7 | 3 | 165  | 18.7  | 5     |
| AOA0A0MRCVoltage-d  |           | 23 | 5 | 6 | 5 | 282  | 30.3  | 7.81  |
| Q4W4Y1              | Dopamine  | 12 | 8 | 8 | 8 | 868  | 96    | 6.52  |
| Q6FHJ7              | Secreted  | 16 | 5 | 7 | 5 | 346  | 39.8  | 8.82  |
| P18627              | Lymphocyt | 13 | 6 | 7 | 6 | 525  | 57.4  | 7.97  |
| AOA5C2G08IGL c1940  |           | 31 | 2 | 7 | 1 | 108  | 11.8  | 7.97  |
| AOA5C2FYHIGL c307_  |           | 39 | 3 | 5 | 1 | 109  | 11.8  | 7.96  |
| AOA5C2GBZIGH + IGL  |           | 45 | 4 | 7 | 1 | 107  | 11.7  | 8.47  |
| AOA5C2GLUIG c316_h  |           | 22 | 3 | 6 | 1 | 127  | 14.2  | 8.19  |
| AOA2U3TZLCD59 glyc  |           | 27 | 4 | 6 | 4 | 120  | 13.3  | 6.25  |
| 075874              | Isocitrat | 14 | 7 | 8 | 7 | 414  | 46.6  | 7.01  |
| P20809              | Interleuk | 36 | 6 | 7 | 6 | 199  | 21.4  | 10.62 |
| AOA5C2G8L IGL c4047 |           | 36 | 3 | 5 | 1 | 113  | 12.6  | 7.93  |
| A8K6C1              | Cholester | 10 | 4 | 6 | 4 | 493  | 54.7  | 6.09  |
| P16152              | Carbonyl  | 29 | 6 | 7 | 6 | 277  | 30.4  | 8.32  |
| P13796              | Plastin-2 | 12 | 7 | 7 | 2 | 627  | 70.2  | 5.43  |
| E5RJR5              | S-phase k | 29 | 4 | 8 | 4 | 163  | 18.7  | 4.7   |
| AOA0G2JLEGlucosylc  |           | 13 | 7 | 9 | 7 | 536  | 59.6  | 7.42  |
| AOA5C2GHXIG c806_h  |           | 30 | 3 | 6 | 1 | 122  | 13.5  | 5.19  |
| B4EOX1              | Beta-2-mi | 22 | 3 | 6 | 3 | 122  | 13.9  | 7.44  |
| AOA024R7VRAB2, mem  |           | 28 | 5 | 7 | 5 | 212  | 23.5  | 6.54  |
| AOA5C2GL9IG c96_he  |           | 24 | 2 | 6 | 1 | 125  | 13.8  | 7.93  |
| AOA5C2GIFIG c198_h  |           | 40 | 5 | 6 | 1 | 130  | 14.7  | 7.91  |
| AOA5C2GX5IG c278_1  |           | 37 | 3 | 5 | 1 | 108  | 11.7  | 8.48  |
| AOA5C2FYE IGL c257_ |           | 35 | 3 | 6 | 2 | 107  | 11.7  | 6.54  |
| AOA5C2GHFIGH + IGL  |           | 39 | 3 | 5 | 1 | 113  | 12.5  | 7.12  |
| B4DRB0              | Tetraspan | 26 | 6 | 7 | 6 | 201  | 22.9  | 8.16  |
| AOA5C2GHWIG c507_h  |           | 25 | 3 | 6 | 1 | 127  | 13.9  | 8.46  |
| AOA2U8J92Ig heavy   |           | 40 | 4 | 8 | 1 | 94   | 10.5  | 8.73  |
| P59998              | Actin-rel | 32 | 5 | 8 | 5 | 168  | 19.7  | 8.43  |
| A8K8C4              | cDNA FLJ7 | 15 | 4 | 6 | 4 | 431  | 47.1  | 4.84  |
| Q9NZP8              | Complemen | 12 | 5 | 7 | 4 | 487  | 53.5  | 7.2   |
| AOA024R6YNuclear t  |           | 48 | 4 | 6 | 4 | 127  | 14.5  | 5.38  |

|            |           |    |   |   |   |      |       |       |
|------------|-----------|----|---|---|---|------|-------|-------|
| D3DV26     | S100 calc | 8  | 3 | 8 | 3 | 205  | 22.3  | 10.33 |
| P23396     | 40S ribos | 33 | 7 | 8 | 7 | 243  | 26.7  | 9.66  |
| K9MS24     | Spectrin  | 3  | 6 | 7 | 2 | 2364 | 274.2 | 5.55  |
| A0A140VJFB | Biliverdi | 21 | 6 | 7 | 6 | 296  | 33.4  | 6.44  |
| A0A2U8J93  | Ig heavy  | 26 | 3 | 7 | 1 | 104  | 11.7  | 7.83  |
| Q9UII7     | E-cadheri | 3  | 3 | 7 | 3 | 901  | 99.6  | 4.78  |
| HOYJW4     | Cochlin ( | 10 | 4 | 6 | 4 | 434  | 48.1  | 6.28  |
| X6RFL8     | Ras-relat | 33 | 5 | 6 | 5 | 181  | 20.4  | 6.33  |
| A0A5C2GR4  | IG c1373_ | 24 | 2 | 4 | 1 | 124  | 13.4  | 7.93  |
| Q6NZI2     | Caveolae- | 16 | 6 | 7 | 6 | 390  | 43.5  | 5.6   |
| A0A3B3ITY  | Calsynten | 17 | 6 | 7 | 1 | 373  | 41.4  | 6.67  |
| A8K7F6     | cDNA FLJ7 | 23 | 8 | 8 | 4 | 406  | 46.1  | 5.48  |
| H7BZJ3     | Protein d | 38 | 4 | 6 | 1 | 123  | 13.5  | 7.3   |
| P12236     | ADP/ATP t | 17 | 5 | 7 | 1 | 298  | 32.8  | 9.74  |
| Q5U043     | S-(hydrox | 17 | 5 | 6 | 5 | 374  | 39.7  | 7.49  |
| A0A5C2G6T  | IGH c8_he | 31 | 3 | 6 | 1 | 119  | 13.2  | 8.88  |
| A0A5C2GEI  | IG c1055_ | 22 | 2 | 4 | 1 | 125  | 13.5  | 5.15  |
| A0A5C2GUH  | IG c1175_ | 32 | 3 | 6 | 1 | 107  | 11.8  | 8.5   |
| Q76LA1     | CSTB prot | 24 | 2 | 6 | 2 | 98   | 11.1  | 7.56  |
| P61020     | Ras-relat | 26 | 4 | 5 | 2 | 215  | 23.7  | 8.13  |
| P04792     | Heat shoc | 20 | 5 | 6 | 5 | 205  | 22.8  | 6.4   |
| A0A140VK2  | Leukotrie | 12 | 6 | 6 | 6 | 611  | 69.2  | 6.18  |
| A0A5C2GL2  | IG c265_h | 40 | 4 | 8 | 1 | 120  | 13.4  | 7.97  |
| A0A024R4X  | NADH-cytc | 19 | 4 | 5 | 4 | 291  | 33.2  | 7.58  |
| A0A5C2GKM  | IG c184_l | 49 | 4 | 6 | 1 | 112  | 12.3  | 7.28  |
| I3L145     | Sex hormo | 13 | 5 | 7 | 5 | 344  | 37.5  | 6.23  |
| D3DP78     | Aspartyl- | 15 | 6 | 7 | 6 | 468  | 53.4  | 6.54  |
| C9JXA5     | Guanine n | 16 | 4 | 6 | 1 | 251  | 27.5  | 6.76  |
| A0A0A0MTH  | Integrin- | 11 | 5 | 6 | 5 | 483  | 54.6  | 7.97  |
| A0A5C2GC9  | IGL c203_ | 49 | 4 | 5 | 1 | 108  | 11.7  | 7.96  |
| P51149     | Ras-relat | 31 | 6 | 7 | 6 | 207  | 23.5  | 6.7   |
| P30626     | Sorcin OS | 31 | 5 | 7 | 5 | 198  | 21.7  | 5.59  |
| Q9GZP4     | PITH doma | 19 | 3 | 5 | 3 | 211  | 24.2  | 5.74  |
| A0A0S2Z3S  | GNAS comp | 13 | 5 | 6 | 4 | 380  | 44.2  | 6.29  |
| Q6ICQ8     | ARHG prot | 10 | 2 | 5 | 1 | 191  | 21.3  | 8.12  |
| A0A5C2GC7  | IGH + IGL | 27 | 2 | 5 | 1 | 109  | 11.9  | 9.1   |
| P20851     | C4b-bindi | 21 | 5 | 6 | 5 | 252  | 28.3  | 5.14  |
| A0N5G5     | Rheumatoi | 30 | 3 | 6 | 1 | 118  | 12.8  | 8.97  |
| Q16777     | Histone H | 37 | 5 | 7 | 2 | 129  | 14    | 10.9  |
| B2R6K4     | cDNA, FLJ | 12 | 4 | 6 | 1 | 340  | 37.3  | 6.18  |
| Q96QV1     | Hedgehog- | 10 | 7 | 7 | 7 | 700  | 78.8  | 7.9   |
| A0A5C2FYI  | IGL c1226 | 32 | 2 | 5 | 1 | 107  | 11.8  | 7.94  |
| A0A5C2G4H  | IGL c3834 | 32 | 3 | 6 | 1 | 108  | 11.9  | 8.94  |
| A0A5C2GMK  | IG c83_he | 26 | 3 | 6 | 1 | 121  | 13.4  | 7.91  |
| Q04760     | Lactoylgl | 26 | 5 | 6 | 5 | 184  | 20.8  | 5.31  |
| Q01995     | Transgeli | 31 | 5 | 6 | 5 | 201  | 22.6  | 8.84  |
| P23526     | Adenosylh | 16 | 6 | 6 | 6 | 432  | 47.7  | 6.34  |
| A0A5C2FX8  | IGL c1591 | 40 | 3 | 6 | 1 | 111  | 12.2  | 8.88  |
| A0A5C2GJC  | IGH + IGL | 39 | 3 | 6 | 1 | 112  | 12.4  | 8.51  |
| A0A5C2GR9  | IG c1244_ | 39 | 5 | 7 | 1 | 128  | 13.7  | 8.44  |
| A0A5C2GM4  | IG c585_h | 25 | 2 | 6 | 1 | 121  | 13.5  | 4.93  |

|                    |    |   |    |   |      |       |      |
|--------------------|----|---|----|---|------|-------|------|
| AOA5C2GUVIG c297_h | 22 | 3 | 6  | 1 | 122  | 13.5  | 8.75 |
| AOA5C2GHJIG c1102_ | 34 | 3 | 6  | 0 | 122  | 13.5  | 7.97 |
| AOA5C2GHUIG c477_h | 25 | 3 | 6  | 1 | 122  | 13.1  | 7.11 |
| B4DZ36 cDNA FLJ5   | 6  | 7 | 7  | 7 | 1156 | 129.7 | 6.87 |
| AOA5C2GTVIG c934_1 | 27 | 2 | 5  | 1 | 107  | 11.7  | 8.46 |
| AOA5C2GQIG c1745_  | 42 | 5 | 6  | 1 | 120  | 13.2  | 5.45 |
| A2J1N5 Rheumatoi   | 32 | 3 | 6  | 1 | 94   | 10.4  | 9.13 |
| P61026 Ras-relat   | 17 | 4 | 6  | 3 | 200  | 22.5  | 8.38 |
| AOA5C2GQ8IG c140_h | 37 | 4 | 6  | 1 | 123  | 13.8  | 8.27 |
| A5GZ70 Matrix me   | 54 | 4 | 7  | 1 | 71   | 8.1   | 6.67 |
| AOA5C2GSEIG c977_1 | 39 | 3 | 4  | 1 | 114  | 12.5  | 6.57 |
| AOA5C2GLUIG c148_h | 21 | 3 | 7  | 0 | 127  | 14.4  | 7.12 |
| K4RH61 Matrix me   | 5  | 3 | 5  | 3 | 582  | 65.9  | 7.97 |
| AOA5C2GVFIG c617_h | 28 | 3 | 6  | 1 | 124  | 13.7  | 6.65 |
| F8W6I7 Heterogen   | 10 | 3 | 6  | 2 | 307  | 33.1  | 9.13 |
| AOA5C2G7KIGL c474_ | 35 | 3 | 6  | 1 | 105  | 11.4  | 7.97 |
| P39656 Dolichyl-   | 16 | 6 | 7  | 6 | 456  | 50.8  | 6.55 |
| Q08257 Quinone o   | 14 | 5 | 6  | 5 | 329  | 35.2  | 8.44 |
| Q14520 Hyalurona   | 9  | 6 | 7  | 6 | 560  | 62.6  | 6.54 |
| AOA5C2GHWIG c466_1 | 39 | 3 | 6  | 1 | 114  | 12.7  | 8.5  |
| AOA5C2GQNIG c1213_ | 42 | 5 | 7  | 1 | 120  | 13    | 8.92 |
| P09238 Stromelys   | 6  | 3 | 5  | 1 | 476  | 54.1  | 5.8  |
| P17174 Aspartate   | 13 | 5 | 6  | 5 | 413  | 46.2  | 7.01 |
| AOA5C2GVIIG c1501_ | 33 | 2 | 4  | 1 | 113  | 12.3  | 5.34 |
| AOA5C2FW3IGL c854_ | 24 | 2 | 5  | 1 | 106  | 11.7  | 8.44 |
| P49908 Selenopro   | 12 | 5 | 8  | 5 | 381  | 43.2  | 7.87 |
| AOA5C2G8SIGH + IGL | 21 | 2 | 5  | 1 | 126  | 13.7  | 8.85 |
| P02741 C-reactiv   | 21 | 4 | 5  | 4 | 224  | 25    | 5.63 |
| E7EUF1 Ectonucle   | 9  | 7 | 7  | 7 | 884  | 101.5 | 7.53 |
| B1ALA9 Ribose-ph   | 19 | 5 | 7  | 5 | 285  | 31.4  | 6.86 |
| Q14974 Importin    | 10 | 6 | 6  | 6 | 876  | 97.1  | 4.78 |
| P08514 Integrin    | 6  | 6 | 6  | 6 | 1039 | 113.3 | 5.38 |
| AOA024R87Chromosom | 10 | 6 | 6  | 6 | 733  | 82.6  | 6.15 |
| AOA5C2G8EIGH + IGL | 24 | 3 | 7  | 1 | 126  | 13.9  | 9.01 |
| Q68DIO AP comple   | 7  | 5 | 5  | 5 | 951  | 105.6 | 5.38 |
| Q16775 Hydroxyac   | 13 | 4 | 6  | 4 | 308  | 33.8  | 8.12 |
| AOA5C2GE4IG c125_h | 23 | 2 | 5  | 1 | 118  | 12.7  | 8.91 |
| P22792 Carboxype   | 9  | 5 | 6  | 5 | 545  | 60.5  | 5.99 |
| AOA5C2GYKIG c1772_ | 33 | 2 | 4  | 1 | 112  | 12    | 7.99 |
| P05141 ADP/ATP t   | 17 | 5 | 6  | 1 | 298  | 32.8  | 9.69 |
| AOA5C2GQFIG c1706_ | 21 | 3 | 10 | 1 | 123  | 13.5  | 6.04 |
| AOA140VJJS-formylg | 11 | 4 | 6  | 4 | 282  | 31.4  | 7.02 |
| AOA5C2G1YIGL c3298 | 53 | 4 | 5  | 1 | 107  | 11.7  | 7.99 |
| AOA5C2GGMIG c55_he | 34 | 3 | 6  | 1 | 124  | 13.6  | 7.97 |
| AOA0S2Z4WProtein k | 11 | 5 | 6  | 5 | 406  | 45.9  | 4.34 |
| P02776 Platelet    | 35 | 3 | 5  | 1 | 101  | 10.8  | 8.62 |
| P08779 Keratin,    | 11 | 5 | 6  | 3 | 473  | 51.2  | 5.05 |
| AOA5C2GIUIG c231_h | 37 | 4 | 5  | 1 | 121  | 13.2  | 9.07 |
| AOA5C2GJSIG c1285_ | 30 | 3 | 5  | 2 | 125  | 13.5  | 5.41 |
| Q14847 LIM and S   | 23 | 5 | 6  | 5 | 261  | 29.7  | 7.05 |
| AOA5C2GARIGH + IGL | 24 | 2 | 4  | 2 | 125  | 13.5  | 8.47 |



|                     |           |    |   |   |   |      |       |      |
|---------------------|-----------|----|---|---|---|------|-------|------|
| P52895              | Aldo-keto | 16 | 4 | 4 | 4 | 323  | 36.7  | 7.49 |
| Q12797              | Aspartyl/ | 7  | 6 | 6 | 6 | 758  | 85.8  | 5.01 |
| AOA125QYYIBM-B2 he  |           | 28 | 3 | 5 | 1 | 123  | 13.6  | 7.12 |
| AOA2U8J8IIg heavy   |           | 31 | 3 | 5 | 1 | 101  | 11.4  | 8.46 |
| Q6FH49              | NNMT prot | 17 | 4 | 5 | 4 | 264  | 29.6  | 5.74 |
| P10253              | Lysosomal | 4  | 3 | 5 | 3 | 952  | 105.3 | 6    |
| AOA5C2GA6IGH c155_  |           | 20 | 3 | 6 | 0 | 126  | 13.9  | 8.46 |
| Q8N428              | Polypepti | 8  | 4 | 5 | 4 | 558  | 63    | 9.13 |
| E7EQG2              | Eukaryoti | 22 | 6 | 6 | 2 | 362  | 41.3  | 5.64 |
| AOA5C2GXAIG c1867_  |           | 33 | 2 | 4 | 1 | 112  | 12.2  | 7.44 |
| Q5HYD8              | Uncharact | 9  | 4 | 6 | 4 | 533  | 60.6  | 5.71 |
| Q59E85              | Caveolin  | 23 | 4 | 5 | 4 | 217  | 25.1  | 7.91 |
| AOA5C2GVEIG c1534_  |           | 30 | 2 | 4 | 1 | 109  | 11.8  | 8.51 |
| QOZCJ1              | Immunglob | 37 | 4 | 5 | 2 | 121  | 13.4  | 8.43 |
| AOA5C2GN8IG c776_h  |           | 25 | 3 | 6 | 1 | 123  | 13.4  | 7.97 |
| AOA5C2GW7IG c689_1  |           | 31 | 2 | 4 | 1 | 108  | 11.7  | 7.96 |
| AOA5C2FX5IGL c175_  |           | 31 | 3 | 5 | 1 | 107  | 11.7  | 8.47 |
| P41222              | Prostagla | 21 | 3 | 5 | 3 | 190  | 21    | 7.8  |
| AOA5C2G1VIGL c2530  |           | 32 | 3 | 6 | 1 | 109  | 11.9  | 8.48 |
| AOA5C2G8QIGH + IGL  |           | 19 | 2 | 5 | 1 | 118  | 12.9  | 8.85 |
| HOYFD6              | Trifuncti | 8  | 5 | 5 | 5 | 792  | 86.3  | 9.1  |
| Q09328              | Alpha-1,6 | 9  | 6 | 6 | 6 | 741  | 84.5  | 8.12 |
| O00292              | Left-righ | 15 | 6 | 7 | 6 | 366  | 40.9  | 8.56 |
| P15169              | Carboxype | 15 | 6 | 6 | 6 | 458  | 52.3  | 7.34 |
| Q9BQB4              | Sclerosti | 23 | 4 | 5 | 4 | 213  | 24    | 9.25 |
| AOA0K0K1K6-phospho  |           | 21 | 5 | 6 | 5 | 258  | 27.5  | 6.05 |
| Q53FN7              | BZW1 prot | 15 | 5 | 6 | 5 | 424  | 48.6  | 6.11 |
| Q15293              | Reticuloc | 18 | 5 | 5 | 5 | 331  | 38.9  | 5    |
| Q9Y678              | Coatomer  | 7  | 4 | 4 | 4 | 874  | 97.7  | 5.47 |
| AOA5C2GAFIGH + IGL  |           | 27 | 4 | 7 | 1 | 124  | 13.4  | 8.98 |
| Q6ZS56              | cDNA FLJ4 | 5  | 4 | 5 | 4 | 618  | 67    | 8    |
| Q59EH3              | Acid phos | 30 | 4 | 4 | 4 | 165  | 18.7  | 7.88 |
| X5D2M8              | Major vau | 8  | 5 | 5 | 5 | 893  | 99.3  | 5.48 |
| F5GZS6              | 4F2 cell- | 9  | 4 | 5 | 4 | 599  | 64.8  | 5.1  |
| Q9Y646              | Carboxype | 13 | 5 | 6 | 5 | 472  | 51.9  | 6.18 |
| AOA5C2FX4IGL c806_  |           | 26 | 2 | 5 | 1 | 107  | 11.7  | 7.94 |
| AOA5C2GBTIIGL c201_ |           | 32 | 2 | 5 | 1 | 107  | 11.6  | 5.96 |
| AOA5C2G1UIGL c3139  |           | 32 | 2 | 5 | 1 | 107  | 11.6  | 8.85 |
| P54709              | Sodium/po | 17 | 4 | 5 | 4 | 279  | 31.5  | 8.35 |
| P49189              | 4-trimeth | 17 | 7 | 7 | 7 | 494  | 53.8  | 5.87 |
| P48723              | Heat shoc | 12 | 5 | 5 | 5 | 471  | 51.9  | 5.76 |
| A8K2Q6              | Peptidyl- | 29 | 4 | 6 | 4 | 212  | 22.7  | 8.4  |
| Q8N1C8              | HSPA9 pro | 7  | 5 | 6 | 4 | 681  | 73.8  | 6.37 |
| AOA5C2GSLIG c2_lig  |           | 33 | 2 | 3 | 1 | 112  | 12.1  | 5.96 |
| AOA5C2GNZIG c685_h  |           | 31 | 3 | 5 | 1 | 122  | 13.6  | 7.94 |
| AOA5C2GFRIG c984_h  |           | 29 | 4 | 5 | 1 | 128  | 14.1  | 8.76 |
| Q9NYU1              | UDP-glucc | 3  | 5 | 5 | 5 | 1516 | 174.6 | 6.89 |
| HOY8G5              | Heterogen | 20 | 4 | 4 | 4 | 260  | 29.6  | 9.16 |
| AOA125U0UMS-C1 hea  |           | 25 | 3 | 4 | 1 | 118  | 13.1  | 6.07 |
| AOA5C2FVUIGL c210_  |           | 33 | 3 | 4 | 1 | 108  | 11.6  | 6.01 |
| O95747              | Serine/th | 8  | 3 | 4 | 3 | 527  | 58    | 6.43 |

|                     |    |   |   |   |      |       |      |
|---------------------|----|---|---|---|------|-------|------|
| AOA5C2FUL IGL c691_ | 39 | 3 | 4 | 2 | 112  | 12.3  | 8.5  |
| AOA5C2GH4IG c421_h  | 41 | 4 | 6 | 1 | 120  | 13.1  | 7.99 |
| Q9H8L6 Multimeri    | 5  | 3 | 4 | 3 | 949  | 104.3 | 5.86 |
| A8K6Y1 cDNA FLJ7    | 15 | 5 | 6 | 5 | 367  | 40.9  | 6.4  |
| AOA0S2Z4GNucleopho  | 15 | 4 | 5 | 4 | 265  | 29.4  | 4.61 |
| P26641 Elongatio    | 9  | 4 | 5 | 4 | 437  | 50.1  | 6.67 |
| Q6FGD7 Tubulin-s    | 47 | 5 | 5 | 5 | 108  | 12.8  | 5.29 |
| AOA024R1AUbiquitin  | 31 | 4 | 4 | 4 | 154  | 17.9  | 8.51 |
| Q68DH9 Calcium-t    | 5  | 6 | 6 | 6 | 1205 | 133.8 | 6.49 |
| AOA5C2GOKIGL c1956  | 43 | 4 | 5 | 1 | 107  | 11.6  | 8.5  |
| AOA5C2GMTIG c1332_  | 20 | 2 | 4 | 1 | 123  | 13.7  | 8.81 |
| B3KNV8 Polypepti    | 6  | 4 | 6 | 4 | 607  | 69.5  | 6.49 |
| AOA024R1URAB5C, me  | 17 | 3 | 4 | 1 | 216  | 23.5  | 8.41 |
| A8K3H8 cDNA FLJ7    | 10 | 6 | 6 | 6 | 589  | 65.3  | 5.11 |
| AOA384MR2Epididymi  | 5  | 5 | 5 | 4 | 1114 | 122   | 5.5  |
| A8K6A5 cDNA FLJ7    | 4  | 4 | 5 | 4 | 1049 | 114.4 | 5.71 |
| P05543 Thyroxine    | 14 | 6 | 7 | 6 | 415  | 46.3  | 6.3  |
| P53621 Coatomer     | 5  | 5 | 5 | 5 | 1224 | 138.3 | 7.66 |
| P17655 Calpain-2    | 6  | 4 | 4 | 4 | 700  | 79.9  | 4.98 |
| AOA5C2GACIGH + IGL  | 28 | 3 | 5 | 1 | 108  | 11.6  | 4.96 |
| P54920 Alpha-sol    | 15 | 3 | 4 | 3 | 295  | 33.2  | 5.36 |
| A8K7F7 cDNA FLJ7    | 7  | 3 | 4 | 3 | 522  | 58.5  | 6.55 |
| Q59H77 T-complex    | 13 | 5 | 5 | 5 | 577  | 63.5  | 6.43 |
| P01591 Immunoglo    | 23 | 3 | 5 | 3 | 159  | 18.1  | 5.24 |
| AOA5C2FYZIGL c1894  | 31 | 2 | 3 | 1 | 108  | 11.8  | 7.96 |
| AOA5C2GQ6IG c510_h  | 12 | 2 | 5 | 1 | 128  | 14    | 9.55 |
| P80108 Phosphati    | 8  | 6 | 6 | 6 | 840  | 92.3  | 6.37 |
| AOA5C2GDZIG c342_h  | 24 | 2 | 5 | 1 | 126  | 13.8  | 5.41 |
| AOA140VJLHypoxanth  | 17 | 3 | 4 | 3 | 218  | 24.6  | 6.68 |
| V9H1C1 Gelsolin     | 35 | 3 | 6 | 1 | 69   | 8     | 5.78 |
| Q8WWI5 Choline t    | 6  | 3 | 4 | 3 | 657  | 73.3  | 8.6  |
| AOA5C2GVFIG c1451_  | 22 | 2 | 5 | 1 | 127  | 14    | 6.57 |
| Q92520 Protein F    | 18 | 3 | 4 | 3 | 227  | 24.7  | 8.29 |
| Q99832 T-complex    | 8  | 4 | 4 | 4 | 543  | 59.3  | 7.65 |
| Q9NZN3 EH domain    | 7  | 4 | 4 | 1 | 535  | 60.8  | 6.57 |
| AOA5C2GS2IG c171_1  | 22 | 2 | 4 | 1 | 111  | 12.3  | 5.99 |
| AOA5C2GPZIG c943_h  | 25 | 3 | 6 | 1 | 120  | 13.2  | 8.46 |
| P78328 HP47 prot    | 23 | 1 | 4 | 1 | 78   | 8.7   | 7.05 |
| AOA2U8J8RIg heavy   | 32 | 3 | 6 | 1 | 98   | 10.8  | 9.45 |
| AOA5C2GUFIG c137_h  | 30 | 4 | 6 | 1 | 120  | 13.2  | 8.85 |
| AOA5C2GPPFIG c1168_ | 18 | 2 | 4 | 1 | 124  | 13.8  | 9.2  |
| AOA5C2GVMIG c1278_  | 24 | 3 | 4 | 1 | 125  | 13.7  | 5.12 |
| AOA0A0MT6Deoxyribo  | 14 | 4 | 6 | 4 | 288  | 33.5  | 8.53 |
| AOA5C2GDAIG c887_h  | 32 | 3 | 6 | 1 | 120  | 12.8  | 7.97 |
| AOA140VJNPerilipin  | 13 | 5 | 5 | 5 | 433  | 46.9  | 5.44 |
| AOA5C2GJEIG c922_h  | 24 | 3 | 4 | 1 | 127  | 13.8  | 6.04 |
| AOA5C2GPEIG c440_h  | 31 | 3 | 4 | 1 | 122  | 13.3  | 8.4  |
| P20618 Proteasom    | 24 | 4 | 6 | 4 | 241  | 26.5  | 8.13 |
| V9HWE8 Epididymi    | 22 | 4 | 4 | 4 | 204  | 23.2  | 5.11 |
| A8K8F9 Phosphoin    | 6  | 3 | 4 | 3 | 756  | 85.6  | 6.7  |
| AOA5C2GPLIG c520_h  | 20 | 2 | 4 | 1 | 123  | 13.5  | 8.46 |

|                    |           |    |   |   |   |       |        |       |
|--------------------|-----------|----|---|---|---|-------|--------|-------|
| P58546             | Myotrophi | 22 | 2 | 4 | 2 | 118   | 12.9   | 5.52  |
| P17213             | Bacterici | 7  | 3 | 4 | 3 | 487   | 53.9   | 9.38  |
| P16104             | Histone H | 22 | 4 | 5 | 1 | 143   | 15.1   | 10.74 |
| AOA5C2FWGIGL c526_ |           | 32 | 2 | 3 | 1 | 107   | 11.9   | 9.51  |
| AOA024R2KRAB5A, me |           | 17 | 3 | 4 | 1 | 215   | 23.6   | 8.15  |
| AOA5C2GQ9IG c1063_ |           | 22 | 3 | 8 | 1 | 121   | 13.5   | 9.55  |
| AOA068LKG Ig heavy |           | 24 | 3 | 5 | 1 | 120   | 13.2   | 9.07  |
| P61006             | Ras-relat | 9  | 2 | 4 | 1 | 207   | 23.7   | 9.07  |
| P07942             | Laminin s | 3  | 4 | 4 | 4 | 1786  | 197.9  | 4.94  |
| B4DV28             | cDNA FLJ5 | 15 | 4 | 4 | 4 | 463   | 51.5   | 6.43  |
| HOYJ34             | Fermitin  | 7  | 4 | 5 | 4 | 640   | 73.3   | 6.98  |
| COJYZ2             | Titin OS= | 0  | 4 | 5 | 4 | 33423 | 3711.4 | 6.52  |
| AOA5C2GHUIG c340_1 |           | 37 | 3 | 4 | 1 | 107   | 11.5   | 5.01  |
| F6WIT2             | Serine/th | 11 | 3 | 4 | 3 | 288   | 32.9   | 6.93  |
| C9JSN9             | Biotinida | 10 | 2 | 4 | 2 | 251   | 28.6   | 6.1   |
| AOA2U8J8G Ig heavy |           | 31 | 3 | 4 | 2 | 101   | 10.9   | 9.2   |
| Q92824             | Proprotei | 2  | 4 | 4 | 4 | 1860  | 206.8  | 6.1   |
| AOA5C2GAUIGH c345_ |           | 20 | 3 | 4 | 0 | 130   | 14.6   | 7.94  |
| B7Z6T9             | cDNA FLJ5 | 7  | 3 | 4 | 3 | 521   | 57.5   | 5.57  |
| B3GQS7             | Mitochond | 9  | 5 | 5 | 5 | 569   | 60.6   | 6.04  |
| B4DDU6             | cDNA FLJ5 | 10 | 5 | 5 | 5 | 503   | 55.4   | 5.43  |
| Q71UI9             | Histone H | 31 | 4 | 4 | 2 | 128   | 13.5   | 10.58 |
| Q9UBS4             | DnaJ homc | 9  | 3 | 4 | 3 | 358   | 40.5   | 6.18  |
| P05160             | Coagulati | 8  | 4 | 4 | 4 | 661   | 75.5   | 6.39  |
| Q86Z22             | Epididymi | 12 | 3 | 5 | 3 | 226   | 23.8   | 9.06  |
| AOA5C2GVFIG c1561_ |           | 22 | 3 | 8 | 1 | 121   | 13.4   | 9.41  |
| AOA024R6KEpididymi |           | 9  | 3 | 4 | 3 | 471   | 53.1   | 6.23  |
| Q508I7             | Anthrax t | 12 | 5 | 5 | 5 | 419   | 46.9   | 6.33  |
| P78539             | Sushi rep | 11 | 4 | 4 | 4 | 464   | 51.5   | 8.66  |
| A8K0T9             | F-actin-c | 22 | 4 | 4 | 3 | 286   | 32.9   | 5.69  |
| AOA5C2FZEIGL c1045 |           | 45 | 3 | 4 | 1 | 108   | 11.5   | 6.55  |
| AOA024RB2HCG24991, |           | 9  | 2 | 4 | 1 | 203   | 22.7   | 8.79  |
| AOA5C2G32IGL c3314 |           | 37 | 3 | 4 | 0 | 108   | 11.9   | 8.88  |
| P30085             | UMP-CMP k | 24 | 4 | 4 | 4 | 196   | 22.2   | 5.57  |
| B4DL86             | 6-phospho | 17 | 6 | 6 | 1 | 429   | 47.4   | 6.47  |
| Q15404             | Ras suppr | 13 | 3 | 4 | 3 | 277   | 31.5   | 8.65  |
| P02585             | Troponin  | 28 | 4 | 5 | 3 | 160   | 18.1   | 4.2   |
| AOA5C2GDXIGH + IGL |           | 20 | 2 | 4 | 1 | 119   | 13.1   | 8.84  |
| AOA5C2GBFIGH + IGL |           | 20 | 3 | 5 | 1 | 127   | 14.2   | 9.47  |
| B2R7P8             | cDNA, FLJ | 10 | 5 | 5 | 5 | 592   | 64.6   | 6.8   |
| AOA172Q3AFibroblas |           | 6  | 5 | 5 | 4 | 733   | 84.8   | 6.55  |
| F6XZQ7             | Glutathio | 31 | 5 | 6 | 4 | 220   | 26.1   | 5.54  |
| I4AY87             | Epididymi | 26 | 2 | 4 | 2 | 115   | 12.5   | 7.88  |
| B4DVE1             | cDNA FLJ5 | 8  | 4 | 4 | 4 | 573   | 64.1   | 5.47  |
| AOA5C2GI5IGH + IGL |           | 26 | 3 | 8 | 2 | 121   | 13.2   | 8.46  |
| AOA5C2FZQIGL c1145 |           | 32 | 3 | 4 | 1 | 107   | 11.8   | 8.5   |
| P30740             | Leukocyte | 14 | 5 | 5 | 5 | 379   | 42.7   | 6.28  |
| AOA5C2GT1IG c1844_ |           | 22 | 3 | 5 | 2 | 124   | 13.4   | 9.51  |
| Q1LZN2             | NOM03 pro | 6  | 3 | 3 | 3 | 807   | 89.8   | 5.67  |
| B4DP27             | cDNA FLJ5 | 18 | 3 | 4 | 3 | 169   | 19.2   | 5.86  |
| AOA5C2H01IG c1278_ |           | 27 | 2 | 4 | 2 | 106   | 11.7   | 8.48  |

|              |           |    |   |   |   |      |       |      |
|--------------|-----------|----|---|---|---|------|-------|------|
| Q86UY0       | TXNDC5 pr | 9  | 3 | 4 | 3 | 360  | 40.3  | 5.83 |
| AOA5C2G8VIGH | + IGL     | 15 | 2 | 4 | 1 | 123  | 13.6  | 9.07 |
| P02533       | Keratin,  | 8  | 4 | 5 | 2 | 472  | 51.5  | 5.16 |
| AOA5C2GJKIG  | c281_1    | 25 | 2 | 3 | 1 | 107  | 11.6  | 5.25 |
| AOA5C2GY3IG  | c630_1    | 25 | 2 | 4 | 1 | 109  | 11.9  | 8.5  |
| AOA5C2GJVIG  | c774_h    | 26 | 3 | 4 | 2 | 125  | 14    | 8.81 |
| AOA5C2GESIG  | c889_h    | 25 | 2 | 4 | 1 | 120  | 13.1  | 4.77 |
| Q2TSD3       | Protein k | 9  | 4 | 5 | 4 | 672  | 76.7  | 7.05 |
| B3KUI5       | Hyaluroni | 15 | 4 | 4 | 4 | 435  | 48.3  | 6.96 |
| AOA2U8J93Ig  | heavy     | 23 | 2 | 4 | 1 | 95   | 10.8  | 6.52 |
| AOA5C2GVCIG  | c1554_    | 31 | 3 | 4 | 1 | 108  | 11.8  | 8.51 |
| O14950       | Myosin re | 27 | 4 | 4 | 4 | 172  | 19.8  | 4.84 |
| AOA5C2GASIGH | + IGL     | 16 | 2 | 4 | 1 | 122  | 13.2  | 8.85 |
| B2RAZ5       | UDP-Gal:b | 10 | 4 | 5 | 4 | 344  | 40    | 9.07 |
| E9PCX2       | Aldo-ketc | 17 | 4 | 4 | 4 | 263  | 29.4  | 6.99 |
| AOA5C2HOLIG  | c1478_    | 14 | 2 | 4 | 1 | 111  | 11.7  | 7.84 |
| AOA5C2GKQIG  | c85_he    | 32 | 3 | 4 | 1 | 120  | 13    | 7.96 |
| Q9Y3E8       | CGI-150 p | 6  | 3 | 5 | 3 | 504  | 55    | 8.7  |
| Q14315       | Filamin-C | 2  | 5 | 5 | 2 | 2725 | 290.8 | 5.97 |
| AOA5C2GEEIGH | + IGL     | 24 | 3 | 5 | 1 | 127  | 14.1  | 9.58 |
| A2VDJ4       | GNPTG pro | 9  | 3 | 4 | 3 | 292  | 32.9  | 6.79 |
| AOA5C2GBRIGH | + IGL     | 25 | 2 | 5 | 1 | 119  | 12.9  | 8.46 |
| AOA5C2GXNIG  | c460_1    | 32 | 3 | 4 | 1 | 104  | 11.3  | 8.5  |
| AOA5C2GIVIG  | c1007_    | 23 | 2 | 5 | 1 | 132  | 14.7  | 6.54 |
| AOA0N9HRKMHC | class     | 11 | 3 | 4 | 3 | 365  | 40.9  | 6.04 |
| AOA5C2GUNIG  | c227_h    | 25 | 2 | 4 | 2 | 122  | 13.2  | 7.96 |
| AOA5C2G6GIGL | c3946     | 29 | 3 | 4 | 1 | 108  | 11.6  | 5.99 |
| AOA5C2G9JIGL | c495_     | 36 | 2 | 3 | 2 | 108  | 11.7  | 8.48 |
| AOA5C2GF1IG  | c531_h    | 43 | 4 | 4 | 1 | 114  | 12.5  | 8.47 |
| Q08722       | Leukocyte | 11 | 4 | 4 | 4 | 323  | 35.2  | 7.21 |
| I1W660       | Dickkopf- | 11 | 3 | 4 | 3 | 266  | 28.7  | 8.4  |
| P10301       | Ras-relat | 11 | 2 | 3 | 1 | 218  | 23.5  | 6.93 |
| O95450       | A disinte | 4  | 4 | 4 | 4 | 1211 | 134.7 | 7.15 |
| AOA5C2G5IIGH | c200_     | 23 | 3 | 4 | 1 | 126  | 14    | 7.12 |
| AOA5C2GSZIG  | c939_h    | 34 | 3 | 5 | 1 | 120  | 13.1  | 7.97 |
| AOA5C2GR6IG  | c1214_    | 15 | 2 | 4 | 1 | 121  | 13.2  | 9.13 |
| AOA5C2G05IGL | c1184     | 15 | 2 | 4 | 1 | 110  | 11.6  | 6.52 |
| AOA024QZ4HCG | 198558    | 28 | 3 | 4 | 3 | 121  | 14.4  | 5.29 |
| P29120       | Neuroendo | 5  | 4 | 5 | 4 | 753  | 84.1  | 5.99 |
| AOA5C2GDWIG  | c225_h    | 22 | 2 | 4 | 1 | 117  | 12.9  | 6.61 |
| AOA5C2GMWIG  | c518_h    | 23 | 3 | 5 | 1 | 124  | 13.8  | 8.16 |
| AOA5C2GQEIG  | c1522_    | 24 | 2 | 3 | 1 | 119  | 12.9  | 5.36 |
| AOA2U8J8Z    | Ig heavy  | 32 | 3 | 4 | 2 | 98   | 10.9  | 6.52 |
| Q96CW1       | AP-2 comp | 6  | 3 | 4 | 3 | 435  | 49.6  | 9.54 |
| B8ZWD1       | Acyl-CoA- | 45 | 3 | 4 | 3 | 97   | 11.1  | 8.32 |
| P05413       | Fatty aci | 29 | 4 | 4 | 4 | 133  | 14.8  | 6.8  |
| MOR0R2       | 40S ribos | 20 | 4 | 4 | 4 | 225  | 25.3  | 9.76 |
| P04632       | Calpain s | 15 | 3 | 3 | 3 | 268  | 28.3  | 5.2  |
| AOA5C2GPSIG  | c1386_    | 24 | 2 | 3 | 1 | 123  | 13.8  | 5.17 |
| Q9BTY2       | Plasma al | 9  | 4 | 5 | 4 | 467  | 54    | 6.25 |
| Q96HF1       | Secreted  | 11 | 3 | 3 | 3 | 295  | 33.5  | 7.42 |

|              |           |    |   |   |   |      |       |      |
|--------------|-----------|----|---|---|---|------|-------|------|
| B4DKJ4       | cDNA FLJ5 | 19 | 2 | 3 | 2 | 142  | 16.1  | 4.68 |
| Q53FV0       | Prohibiti | 14 | 3 | 4 | 3 | 272  | 29.8  | 6.39 |
| P10720       | Platelet  | 38 | 3 | 4 | 1 | 104  | 11.5  | 9.1  |
| B2R8Z8       | cDNA, FLJ | 7  | 4 | 4 | 1 | 623  | 69.6  | 8.76 |
| O95631       | Netrin-1  | 10 | 5 | 5 | 5 | 604  | 67.7  | 8.76 |
| AOA5C2GPWIG  | c620_h    | 36 | 4 | 6 | 2 | 122  | 13.3  | 8.85 |
| Q9HCB6       | Spondin-1 | 5  | 4 | 4 | 4 | 807  | 90.9  | 6.11 |
| Q58EX2       | Protein s | 2  | 4 | 4 | 4 | 2172 | 239.2 | 7.06 |
| AOA1B1CYC    | Vitamin D | 38 | 2 | 4 | 2 | 34   | 3.7   | 8.56 |
| P05026       | Sodium/po | 13 | 4 | 4 | 4 | 303  | 35    | 8.53 |
| Q5TDH0       | Protein D | 11 | 3 | 4 | 3 | 399  | 44.5  | 5.05 |
| AOA5C2GJXIG  | c121_h    | 30 | 3 | 4 | 1 | 123  | 13.6  | 7.96 |
| AOA5C2GBQ    | IGL c343_ | 24 | 2 | 3 | 1 | 113  | 12.3  | 7.93 |
| AOA5C2G1NIGL | c2366     | 29 | 2 | 3 | 2 | 108  | 11.6  | 9.29 |
| AOA5C2G9UIGH | + IGL     | 23 | 2 | 3 | 1 | 130  | 14.3  | 9.03 |
| AOA5C2GDCIGH | + IGL     | 18 | 2 | 3 | 1 | 125  | 13.8  | 5.29 |
| AOA5C2GXKIG  | c430_1    | 23 | 4 | 5 | 3 | 110  | 11.5  | 7.83 |
| K7EQL4       | Troponin  | 8  | 1 | 6 | 1 | 210  | 25.3  | 9.66 |
| AOA5C2GF5IG  | c326_h    | 27 | 3 | 3 | 2 | 131  | 14.4  | 7.96 |
| AOA5C2G28IGL | c1577     | 31 | 2 | 3 | 1 | 108  | 12    | 9.25 |
| Q15365       | Poly(rC)- | 12 | 4 | 4 | 2 | 356  | 37.5  | 7.09 |
| Q7Z2W2       | Extracell | 5  | 4 | 4 | 4 | 871  | 101   | 9.09 |
| Q6I9T8       | Serine/th | 15 | 4 | 4 | 4 | 309  | 35.5  | 5.54 |
| Q6FHZ0       | Malate de | 12 | 4 | 5 | 4 | 338  | 35.5  | 8.68 |
| AOA5C2H0EIG  | c1550_    | 45 | 3 | 3 | 2 | 107  | 11.6  | 7.96 |
| Q7Z7H5       | Transmemb | 16 | 3 | 5 | 3 | 227  | 25.9  | 8.28 |
| AOA5C2GN4IG  | c283_h    | 18 | 2 | 4 | 1 | 122  | 13.6  | 8.43 |
| P62280       | 40S ribos | 26 | 4 | 4 | 4 | 158  | 18.4  | 10.3 |
| Q6UY50       | NL3 OS=Hc | 15 | 3 | 4 | 3 | 218  | 24.6  | 6.79 |
| Q6H9L7       | Isthmin-2 | 8  | 4 | 4 | 4 | 571  | 63.9  | 4.81 |
| AOA0S2Z51G   | protein   | 6  | 4 | 4 | 4 | 687  | 77    | 8.44 |
| AOA5C2G4LIGL | c3366     | 40 | 3 | 3 | 1 | 113  | 12.6  | 6.57 |
| G9I6H4       | BNF1 vari | 15 | 2 | 4 | 1 | 136  | 15.3  | 7.64 |
| P51991       | Heterogen | 8  | 3 | 4 | 2 | 378  | 39.6  | 9.01 |
| AOA5C2GIQIG  | c88_he    | 31 | 3 | 6 | 1 | 123  | 13.3  | 7.99 |
| P02778       | C-X-C mot | 20 | 2 | 4 | 2 | 98   | 10.9  | 9.86 |
| AOA5C2GTZIG  | c1163_    | 33 | 2 | 4 | 2 | 112  | 12.1  | 7.12 |
| Q16363       | Laminin s | 2  | 4 | 4 | 4 | 1823 | 202.4 | 6.28 |
| P32969       | 60S ribos | 15 | 2 | 3 | 2 | 192  | 21.9  | 9.95 |
| AOA087X08C   | -C motif  | 16 | 2 | 4 | 2 | 115  | 13.1  | 8.57 |
| AOA024RAM    | Glutaredo | 31 | 3 | 3 | 3 | 106  | 11.8  | 8.09 |
| Q7Z7M4       | Superoxid | 16 | 3 | 3 | 3 | 213  | 23.7  | 7.31 |
| P49588       | Alanine-- | 5  | 4 | 4 | 4 | 968  | 106.7 | 5.53 |
| AOA5C2GR4IG  | c359_h    | 20 | 2 | 3 | 1 | 123  | 13.6  | 7.11 |
| O15145       | Actin-rel | 21 | 4 | 4 | 4 | 178  | 20.5  | 8.59 |
| F8VZX2       | Poly(rC)- | 14 | 4 | 4 | 2 | 321  | 33.8  | 8.24 |
| Q53R15       | Uncharact | 22 | 3 | 4 | 3 | 140  | 15.6  | 4.79 |
| Q9H3Y0       | Peptidase | 8  | 2 | 3 | 2 | 253  | 28.6  | 9    |
| AOA5C2GR6IG  | c1688_    | 13 | 2 | 4 | 1 | 119  | 13.2  | 7.12 |
| AOA5C2GNEIG  | c965_h    | 16 | 2 | 3 | 1 | 126  | 14    | 9.06 |
| AOA5C2GKXIG  | c351_h    | 12 | 2 | 4 | 1 | 121  | 13.2  | 8.44 |

|                    |           |    |   |   |   |      |       |      |
|--------------------|-----------|----|---|---|---|------|-------|------|
| Q8N5Y3             | GYG1 prot | 9  | 3 | 4 | 3 | 331  | 37.2  | 5.4  |
| AOA5C2GEIIGH       | c441_     | 31 | 3 | 3 | 1 | 124  | 13.7  | 7.12 |
| Q8N142             | Adenylosu | 9  | 3 | 3 | 3 | 457  | 50.2  | 8.59 |
| AOA5C2FZWIGL       | c2449     | 19 | 2 | 4 | 1 | 108  | 11.6  | 4.84 |
| AOA494COSC3        | and PZ    | 1  | 2 | 3 | 2 | 1932 | 211.2 | 6.6  |
| AOA5C2GBEIGL       | c3713     | 31 | 4 | 5 | 2 | 111  | 11.6  | 7.99 |
| B4DT28             | Heterogen | 12 | 5 | 5 | 2 | 494  | 55.7  | 9.23 |
| Q14DE1             | GLDN prot | 7  | 3 | 3 | 3 | 427  | 45.8  | 6.95 |
| Q14651             | Plastin-1 | 6  | 3 | 3 | 1 | 629  | 70.2  | 5.41 |
| P50991             | T-complex | 7  | 3 | 3 | 3 | 539  | 57.9  | 7.83 |
| AOA5C2GDIIGH       | c31_h     | 36 | 4 | 4 | 1 | 120  | 13.1  | 8.43 |
| AOA5C2GTEIG        | c791_h    | 22 | 2 | 3 | 1 | 121  | 13.1  | 6.04 |
| AOA5C2FWNIGL       | c1222     | 47 | 3 | 3 | 1 | 107  | 11.5  | 8.5  |
| O15260             | Surfeit 1 | 15 | 4 | 4 | 4 | 269  | 30.4  | 7.78 |
| Q53GD1             | Guanine n | 22 | 1 | 3 | 1 | 72   | 8     | 8.97 |
| A8K4T6             | cDNA FLJ7 | 10 | 3 | 3 | 3 | 504  | 56.2  | 5.57 |
| AOA5C2GLWIG        | c505_h    | 23 | 3 | 4 | 1 | 121  | 13.3  | 8.94 |
| AOA5C2GXMIG        | c450_1    | 20 | 2 | 3 | 1 | 110  | 11.5  | 7.99 |
| AOA5C2GN2IG        | c263_h    | 25 | 3 | 3 | 2 | 125  | 14.1  | 8.41 |
| O14792             | Heparan s | 11 | 4 | 5 | 4 | 307  | 35.8  | 8.84 |
| AOA5C2GHFIG        | c486_1    | 35 | 3 | 3 | 2 | 110  | 12    | 8.48 |
| AOA5C2GQ5IG        | c1526_    | 17 | 2 | 4 | 1 | 127  | 14.3  | 8.41 |
| AOA5C2FYCIGL       | c277_     | 25 | 2 | 3 | 1 | 106  | 11.5  | 7.12 |
| V9HWJ1             | Glutathio | 8  | 4 | 4 | 4 | 474  | 52.4  | 5.92 |
| AOA5C2GAMIGL       | c482_     | 25 | 2 | 3 | 1 | 107  | 11.4  | 7.12 |
| AOA5C2G9HIGH       | + IGL     | 22 | 2 | 3 | 1 | 124  | 13.6  | 7.96 |
| Q05DK5             | ADD2 prot | 3  | 2 | 3 | 2 | 709  | 78.8  | 5.63 |
| AOA5C2GPXIG        | c754_h    | 18 | 2 | 3 | 1 | 123  | 13.3  | 7.96 |
| AOA140VK9RAN       | bindi     | 13 | 3 | 3 | 3 | 201  | 23.3  | 5.29 |
| B7Z6Z4             | Myosin li | 13 | 3 | 3 | 2 | 238  | 26.7  | 5.08 |
| AOA3G1LBHProto-onc |           | 12 | 2 | 3 | 2 | 188  | 21.5  | 8.12 |
| AOA5C2GXCIG        | c1247_    | 20 | 3 | 4 | 1 | 128  | 13.8  | 7.93 |
| Q5T7C4             | High mobi | 27 | 3 | 3 | 3 | 158  | 18.3  | 9.7  |
| B4DR61             | Protein t | 9  | 4 | 4 | 4 | 482  | 52.9  | 8.24 |
| AOA5C2G6HIGH       | c192_     | 33 | 3 | 3 | 1 | 113  | 12.4  | 8.02 |
| I3LOA0             | HCG204478 | 10 | 4 | 4 | 2 | 370  | 42.2  | 6.71 |
| G3V357             | Ribonucle | 41 | 2 | 3 | 2 | 116  | 13    | 7.91 |
| A8K6T3             | cDNA FLJ7 | 3  | 3 | 3 | 3 | 896  | 99.9  | 6.15 |
| AOA5C2GTLIG        | c1056_    | 32 | 3 | 3 | 0 | 109  | 11.8  | 8.5  |
| AOA1U9X79APOM      | OS=H      | 21 | 3 | 4 | 3 | 116  | 13    | 7.75 |
| B7Z4B2             | Aminopect | 6  | 5 | 5 | 5 | 825  | 92.8  | 5.4  |
| AOA5C2GWNIG        | c1232_    | 14 | 2 | 3 | 0 | 113  | 12.4  | 6.57 |
| Q06210             | Glutamine | 6  | 4 | 4 | 4 | 699  | 78.8  | 7.11 |
| B3KQU9             | cDNA PSEC | 4  | 2 | 4 | 1 | 496  | 53.6  | 7.5  |
| AOA5C2GFMIG        | c239_h    | 25 | 3 | 4 | 3 | 126  | 13.7  | 9.47 |
| AOA384NPREpididymi |           | 18 | 4 | 4 | 4 | 170  | 19.3  | 9.41 |
| AOA087WUCGlutathio |           | 24 | 3 | 3 | 3 | 202  | 21.9  | 6.55 |
| F5GY37             | Prohibiti | 13 | 3 | 3 | 3 | 267  | 29.7  | 9.88 |
| AOA5C2GFWIGL       | c289_     | 21 | 2 | 4 | 1 | 107  | 11.5  | 4.65 |
| Q86SR1             | Polypepti | 7  | 3 | 3 | 3 | 603  | 68.9  | 8.59 |
| P46926             | Glucosami | 12 | 3 | 3 | 2 | 289  | 32.6  | 6.92 |

|               |           |    |   |   |   |     |      |       |
|---------------|-----------|----|---|---|---|-----|------|-------|
| Q15043        | Zinc tran | 7  | 2 | 3 | 2 | 492 | 54.2 | 5.33  |
| AOA5C2GBHIGH  | + IGL     | 19 | 2 | 3 | 2 | 135 | 14.6 | 8     |
| P62330        | ADP-ribos | 10 | 2 | 3 | 1 | 175 | 20.1 | 8.95  |
| Q15370        | Elongin-B | 20 | 3 | 4 | 3 | 118 | 13.1 | 4.88  |
| AOA5C2GGAIG   | c1149_    | 16 | 2 | 3 | 1 | 119 | 13   | 8     |
| Q549N0        | Cofilin 2 | 23 | 3 | 3 | 1 | 166 | 18.7 | 7.88  |
| AOA5C2GU7IG   | c857_1    | 29 | 3 | 3 | 1 | 108 | 11.6 | 7.99  |
| AOA5C2GLEIG   | c345_h    | 16 | 2 | 4 | 1 | 122 | 13.3 | 9.17  |
| AOA5C2GJCIG   | c1142_    | 43 | 3 | 4 | 2 | 107 | 11.6 | 8.44  |
| P08311        | Cathepsin | 9  | 2 | 3 | 2 | 255 | 28.8 | 11.19 |
| AOA5C2G3MIGL  | c3762     | 32 | 3 | 3 | 1 | 107 | 11.6 | 8.78  |
| Q549J4        | Erythroid | 23 | 2 | 3 | 2 | 102 | 11.8 | 5     |
| AOA5C2GY8IG   | c608_1    | 27 | 2 | 3 | 1 | 108 | 11.8 | 8.88  |
| B4DMH3        | Coronin C | 13 | 5 | 6 | 5 | 437 | 49.3 | 7.02  |
| P63316        | Troponin  | 7  | 1 | 3 | 1 | 161 | 18.4 | 4.18  |
| J3KR73        | Ras-relat | 19 | 2 | 3 | 2 | 124 | 14.3 | 4.78  |
| Q6IAT9        | Proteasom | 16 | 3 | 3 | 3 | 239 | 25.3 | 4.92  |
| AOA5C2GLRIG   | c495_h    | 24 | 2 | 2 | 1 | 126 | 13.8 | 6.52  |
| P55056        | Apolipopr | 14 | 3 | 4 | 1 | 127 | 14.5 | 8.92  |
| P48163        | NADP-depe | 8  | 3 | 3 | 3 | 572 | 64.1 | 6.13  |
| AOA5C2GN4IG   | c54_he    | 18 | 2 | 3 | 1 | 118 | 13.3 | 8.51  |
| AOA5C2G1FIGL  | c253_     | 31 | 4 | 4 | 3 | 114 | 12   | 8.47  |
| B1AH49        | 3-mercapt | 10 | 2 | 3 | 2 | 224 | 25   | 7.65  |
| AOA5C2FYVIGL  | c2198     | 15 | 2 | 3 | 1 | 110 | 11.4 | 7.96  |
| D6RD58        | Leukocyte | 51 | 3 | 4 | 3 | 79  | 8.9  | 9.58  |
| Q7RU04        | Aminopect | 5  | 3 | 3 | 3 | 658 | 73.5 | 6.11  |
| AOA5C2G52IGL  | c3526     | 15 | 2 | 3 | 1 | 110 | 11.4 | 7.11  |
| Q9H3K6        | BolA-like | 41 | 2 | 2 | 2 | 86  | 10.1 | 6.52  |
| AOA5C2GI8IG   | c346_h    | 29 | 3 | 3 | 3 | 124 | 14   | 9.2   |
| C9JRR0        | Augurin ( | 13 | 2 | 4 | 2 | 142 | 17.1 | 9.79  |
| AOA5C2GQ6IG   | c864_h    | 21 | 2 | 2 | 1 | 126 | 13.5 | 7.96  |
| A2VCL5        | Flotillin | 16 | 3 | 4 | 3 | 237 | 26.3 | 5.88  |
| C9JD32        | 60S ribos | 25 | 2 | 3 | 2 | 91  | 9.7  | 11.49 |
| AOA090N8GG    | glycyl-tR | 4  | 3 | 4 | 3 | 685 | 77.5 | 6.24  |
| P62318        | Small nuc | 15 | 2 | 3 | 2 | 126 | 13.9 | 10.32 |
| AOA5C2G8FIGL  | c3915     | 15 | 2 | 3 | 1 | 110 | 11.7 | 7.11  |
| AOA4P8J54IgG4 | IGHV      | 15 | 2 | 3 | 1 | 134 | 14.7 | 7.75  |
| AOA5C2GWNIG   | c987_h    | 14 | 2 | 3 | 1 | 125 | 13.7 | 7.87  |
| AOA5C2GDUIG   | c1122_    | 20 | 2 | 3 | 1 | 125 | 13.7 | 8.7   |
| AOA5C2G6LIGH  | c232_     | 20 | 2 | 3 | 1 | 125 | 13.9 | 8.41  |
| AOA5C2G0FIGL  | c2534     | 34 | 2 | 2 | 0 | 108 | 11.7 | 9.25  |
| P36959        | GMP reduc | 11 | 3 | 3 | 3 | 345 | 37.4 | 7.06  |
| AOA024R7C     | Brain spe | 24 | 4 | 4 | 4 | 176 | 19   | 9.13  |
| AOA5C2G24IGL  | c2025     | 36 | 3 | 3 | 1 | 107 | 11.5 | 8.97  |
| HOYL69        | Proteasom | 15 | 3 | 3 | 3 | 236 | 26.4 | 7.71  |
| AOA5C2HOAIG   | c366_1    | 15 | 2 | 3 | 1 | 110 | 11.6 | 7.87  |
| P46977        | Dolichyl- | 3  | 2 | 3 | 2 | 705 | 80.5 | 8.07  |
| AOA5C2FXAIGL  | c1611     | 30 | 2 | 3 | 1 | 107 | 11.8 | 7.99  |
| Q9NP72        | Ras-relat | 20 | 3 | 3 | 3 | 206 | 23   | 5.24  |
| Q9BZM5        | UL16-bind | 9  | 2 | 3 | 2 | 246 | 27.4 | 7.3   |
| W6A4U0        | Tetraspan | 8  | 2 | 3 | 2 | 238 | 25.6 | 7.62  |

|              |           |    |   |   |   |      |       |       |
|--------------|-----------|----|---|---|---|------|-------|-------|
| 014992       | HS24/P52  | 7  | 3 | 3 | 3 | 474  | 52.3  | 8.21  |
| Q53HB3       | Proteasom | 11 | 3 | 3 | 3 | 440  | 49.2  | 6.21  |
| AOA5C2G0EIGL | c2127     | 15 | 2 | 3 | 1 | 110  | 11.5  | 8.29  |
| AOA5C2GF2IG  | c450_h    | 24 | 2 | 3 | 1 | 127  | 13.9  | 5.15  |
| AOA5C2FWZIGL | c65_1     | 31 | 2 | 2 | 1 | 109  | 11.7  | 7.96  |
| P55107       | Growth/di | 9  | 4 | 5 | 4 | 478  | 53.1  | 9.51  |
| F5H5V4       | 26S prote | 24 | 3 | 3 | 3 | 153  | 16.9  | 6.11  |
| O15230       | Laminin s | 1  | 4 | 4 | 4 | 3695 | 399.5 | 7.02  |
| AOA1C9J6RB   | cell re   | 23 | 2 | 3 | 1 | 132  | 14.5  | 8.84  |
| Q96AY3       | Peptidyl- | 5  | 3 | 3 | 3 | 582  | 64.2  | 5.62  |
| AOA5C2G5GIGL | c2857     | 15 | 2 | 3 | 1 | 110  | 11.6  | 5.29  |
| P80188       | Neutrophi | 12 | 2 | 3 | 2 | 198  | 22.6  | 8.91  |
| P25788       | Proteasom | 12 | 3 | 3 | 3 | 255  | 28.4  | 5.33  |
| AOA5C2GK8IG  | c504_1    | 28 | 2 | 3 | 0 | 108  | 11.5  | 4.78  |
| Q15166       | Serum par | 5  | 2 | 3 | 2 | 354  | 39.6  | 5.41  |
| B4E1L0       | Adenylosu | 5  | 2 | 3 | 2 | 435  | 47.9  | 5.91  |
| G3V4C1       | Heterogen | 7  | 3 | 3 | 3 | 292  | 32.2  | 5.08  |
| B2R7D2       | cDNA, FLJ | 9  | 3 | 3 | 3 | 487  | 55.1  | 7.97  |
| AOA5C2G11IGL | c2849     | 7  | 1 | 3 | 1 | 110  | 11.3  | 7.97  |
| AOA5C2G4SIGL | c1283     | 36 | 3 | 4 | 0 | 107  | 11.6  | 8.91  |
| AOA5C2GR2IG  | c339_h    | 26 | 3 | 7 | 1 | 124  | 13.4  | 6.49  |
| B8ZZL8       | 10 kDa he | 18 | 2 | 3 | 2 | 101  | 10.7  | 9.58  |
| P05387       | 60S acidi | 14 | 1 | 2 | 1 | 115  | 11.7  | 4.54  |
| P21781       | Fibroblas | 11 | 2 | 3 | 2 | 194  | 22.5  | 9.14  |
| A2A2V4       | Vascular  | 15 | 3 | 3 | 3 | 163  | 19    | 7.49  |
| AOA5C2GMAIG  | c1071_    | 35 | 3 | 3 | 1 | 107  | 11.9  | 8.92  |
| AOA5C2FTSIGL | c381_     | 15 | 2 | 3 | 1 | 109  | 11.5  | 7.12  |
| C9J3L8       | Transloco | 10 | 2 | 3 | 2 | 265  | 29.6  | 4.3   |
| D3DT44       | Glutamate | 13 | 3 | 3 | 3 | 254  | 28.6  | 6.02  |
| AOA494COG    | Phosphoac | 6  | 3 | 3 | 3 | 501  | 55.4  | 6.42  |
| A8KAJ7       | Polypepti | 6  | 3 | 3 | 3 | 559  | 64.2  | 7.74  |
| AOA5C2H1EIG  | c1930_    | 25 | 2 | 3 | 1 | 108  | 11.8  | 9.35  |
| AOA2R8Y8140S | ribos     | 15 | 2 | 3 | 2 | 150  | 16.1  | 10.05 |
| Q9P2E5       | Chondroit | 5  | 3 | 3 | 3 | 772  | 85.9  | 7.83  |
| P04921       | Glycophor | 27 | 2 | 2 | 2 | 128  | 13.8  | 4.84  |
| Q59FD4       | Hexokinas | 4  | 3 | 3 | 3 | 949  | 105.7 | 6.84  |
| A8K482       | Aspartate | 7  | 3 | 3 | 3 | 430  | 47.5  | 9.23  |
| AOA5C2GPIIG  | c480_h    | 15 | 2 | 3 | 1 | 124  | 13.8  | 5.45  |
| O43488       | Aflatoxin | 9  | 3 | 3 | 3 | 359  | 39.6  | 7.17  |
| AOA5C2G67IGL | c4130     | 37 | 3 | 3 | 1 | 107  | 11.6  | 9.2   |
| MOR210       | 40S ribos | 20 | 3 | 4 | 3 | 129  | 14.4  | 10.23 |
| AOA0S2Z4I    | Phosphofr | 4  | 3 | 3 | 2 | 749  | 81.7  | 7.62  |
| Q53FU0       | Carbohydr | 7  | 3 | 4 | 3 | 414  | 48.4  | 9.38  |
| A2NB44       | Cold aggl | 22 | 2 | 3 | 1 | 114  | 12.8  | 7.11  |
| B4DKZ9       | cDNA FLJ5 | 6  | 3 | 3 | 3 | 602  | 70.3  | 8.56  |
| Q01105       | Protein S | 7  | 2 | 3 | 2 | 290  | 33.5  | 4.32  |
| V9HWB5       | Epididymi | 9  | 3 | 3 | 3 | 289  | 32.6  | 5.86  |
| AOA5C2GBKIGL | c23_1     | 35 | 3 | 3 | 1 | 107  | 11.4  | 7.97  |
| AOA5C2GH7IG  | c941_h    | 12 | 2 | 3 | 1 | 132  | 14.8  | 6.6   |
| AOA5C2GTTIG  | c925_1    | 29 | 2 | 2 | 1 | 113  | 12.6  | 8.41  |
| J3KR23       | IST1 homc | 10 | 2 | 2 | 2 | 289  | 31.2  | 4.75  |



|                    |    |   |   |   |      |       |      |
|--------------------|----|---|---|---|------|-------|------|
| AOA5C2G6NIGL c18_1 | 28 | 2 | 3 | 1 | 109  | 11.6  | 5.01 |
| AOA5C2GIJIG c1242_ | 25 | 2 | 2 | 1 | 108  | 11.5  | 5.94 |
| O14657 Torsin-1B   | 6  | 2 | 3 | 2 | 336  | 38    | 8.54 |
| AOA5C2G3JIGL c3494 | 27 | 2 | 2 | 2 | 107  | 11.7  | 8.29 |
| AOA024R7WInositol  | 13 | 3 | 4 | 3 | 359  | 38.7  | 6.86 |
| F6U1T9 Calcineur   | 14 | 2 | 3 | 2 | 160  | 18.2  | 4.92 |
| P45378 Troponin    | 6  | 1 | 2 | 1 | 269  | 31.8  | 5.9  |
| A4D1M6 HCG19809    | 6  | 1 | 2 | 1 | 225  | 24.9  | 4.82 |
| AOA384MEEEpididymi | 11 | 3 | 3 | 3 | 406  | 46.9  | 5.26 |
| B4DN59 cDNA FLJ5   | 5  | 2 | 3 | 2 | 329  | 36    | 5.9  |
| V9HWC4 Epididymi   | 26 | 3 | 3 | 3 | 125  | 13.8  | 6.07 |
| P05198 Eukaryoti   | 10 | 3 | 3 | 3 | 315  | 36.1  | 5.08 |
| Q96G03 Phosphogl   | 5  | 3 | 3 | 3 | 612  | 68.2  | 6.73 |
| AOA494COLThymidine | 14 | 3 | 3 | 3 | 289  | 29.7  | 6.92 |
| AOA5C2GUEIG c97_he | 30 | 3 | 3 | 2 | 126  | 14    | 8.47 |
| P55290 Cadherin-   | 8  | 4 | 4 | 4 | 713  | 78.2  | 4.98 |
| V9HWB7 Epididymi   | 4  | 4 | 4 | 4 | 889  | 98.3  | 6.68 |
| Q9NQW7 Xaa-Pro a   | 5  | 3 | 3 | 3 | 623  | 69.9  | 5.67 |
| P47985 Cytochrom   | 13 | 2 | 2 | 2 | 274  | 29.6  | 8.32 |
| Q00688 Peptidyl-   | 8  | 2 | 3 | 2 | 224  | 25.2  | 9.28 |
| P24592 Insulin-1   | 10 | 2 | 2 | 2 | 240  | 25.3  | 7.81 |
| P62906 60S ribos   | 22 | 4 | 5 | 4 | 217  | 24.8  | 9.94 |
| AOA068LNCIg heavy  | 15 | 2 | 3 | 1 | 120  | 13.4  | 8.43 |
| AOA5C2GLNIG c455_h | 21 | 3 | 7 | 1 | 121  | 13.5  | 9.47 |
| Q16222 UDP-N-ace   | 5  | 2 | 2 | 2 | 522  | 58.7  | 6.33 |
| P00966 Argininos   | 8  | 3 | 3 | 3 | 412  | 46.5  | 8.02 |
| Q6PKX1 Myocilin    | 12 | 3 | 3 | 3 | 260  | 29.5  | 5.11 |
| P14550 Aldo-ketc   | 14 | 5 | 5 | 5 | 325  | 36.6  | 6.79 |
| Q96DG6 Carboxyme   | 7  | 2 | 3 | 2 | 245  | 28    | 7.18 |
| AOA2U8J94Ig heavy  | 17 | 2 | 3 | 1 | 103  | 11.4  | 6.57 |
| AOA5C2GNFIG c828_h | 15 | 2 | 4 | 1 | 125  | 13.8  | 7.12 |
| Q5JQ44 Uncharact   | 18 | 3 | 3 | 3 | 181  | 20.3  | 4.81 |
| AOA5C2GRXIG c235_1 | 22 | 3 | 3 | 1 | 112  | 11.9  | 6.77 |
| AOA024R7Sclathrin  | 13 | 3 | 3 | 3 | 211  | 23.2  | 4.69 |
| AOA5C2FZ5IGL c2202 | 35 | 2 | 2 | 1 | 108  | 11.8  | 9.25 |
| AOA5C2GT4IG c517_1 | 26 | 3 | 3 | 1 | 107  | 11.5  | 9.57 |
| AOA5C2FYEIGL c1156 | 26 | 2 | 2 | 1 | 108  | 11.8  | 7.28 |
| B4DWE8 cDNA FLJ5   | 3  | 3 | 3 | 3 | 751  | 84    | 5.24 |
| AOA087WURInactive  | 7  | 3 | 3 | 3 | 416  | 46.5  | 9.04 |
| Q04941 Proteolip   | 18 | 2 | 3 | 2 | 152  | 16.7  | 7.24 |
| B4DUF7 cDNA FLJ5   | 8  | 3 | 3 | 3 | 435  | 48.9  | 7.42 |
| Q9BXJ0 Complemen   | 10 | 2 | 3 | 2 | 243  | 25.3  | 6.54 |
| AOA5C2GJMIG c981_1 | 18 | 2 | 3 | 1 | 112  | 12.3  | 5.05 |
| K7EL40 Septin-9    | 17 | 3 | 3 | 3 | 209  | 24    | 9.35 |
| Q16706 Alpha-man   | 3  | 4 | 4 | 4 | 1144 | 131.1 | 7.58 |
| AOA140VK2Testicula | 8  | 3 | 3 | 3 | 440  | 49.5  | 6.11 |
| O00231 26S prote   | 10 | 3 | 3 | 3 | 422  | 47.4  | 6.48 |
| P55327 Tumor pro   | 7  | 1 | 2 | 1 | 224  | 24.3  | 4.83 |
| AOA1W6IYIN90-VRC38 | 24 | 2 | 2 | 1 | 124  | 13.5  | 6.77 |
| B3KRV7 Lipoprote   | 5  | 3 | 3 | 3 | 461  | 51.7  | 8.02 |
| P13010 X-ray rep   | 3  | 2 | 3 | 2 | 732  | 82.7  | 5.81 |

|                    |           |    |   |   |   |      |       |       |
|--------------------|-----------|----|---|---|---|------|-------|-------|
| AON7I9             | F5-20 (Fr | 10 | 1 | 3 | 1 | 123  | 13.4  | 9.1   |
| AOA5C2G5QIGL       | c392C     | 25 | 2 | 2 | 1 | 108  | 11.5  | 5.35  |
| AOA024R71Nicotinam |           | 7  | 2 | 2 | 2 | 491  | 55.5  | 7.15  |
| AOA5C2FXSIGL       | c1141     | 52 | 3 | 3 | 1 | 107  | 11.4  | 7.96  |
| AOA087WYTProstagla |           | 12 | 2 | 3 | 2 | 164  | 19.1  | 4.55  |
| AOA5C2GHMIGH       | + IGL     | 18 | 2 | 3 | 0 | 125  | 13.7  | 8.43  |
| AOA5C2H1IIG        | c1778_    | 27 | 2 | 3 | 1 | 107  | 11.8  | 9.13  |
| AOA346FYQPro-nerve |           | 8  | 3 | 3 | 3 | 296  | 32.5  | 9.88  |
| AOA384NQ3Epididymi |           | 12 | 3 | 3 | 3 | 247  | 28.5  | 6.02  |
| AOA494COEUV        | excisi    | 17 | 3 | 3 | 1 | 282  | 30.5  | 4.84  |
| P48426             | Phosphati | 8  | 3 | 3 | 3 | 406  | 46.2  | 6.99  |
| P16401             | Histone H | 16 | 4 | 4 | 1 | 226  | 22.6  | 10.92 |
| E7DVW4             | Epididymi | 25 | 2 | 2 | 2 | 132  | 14.7  | 7.14  |
| AOA5C2H05IG        | c1450_    | 14 | 2 | 3 | 1 | 108  | 11.8  | 8.5   |
| HOYGX7             | Rho GDP-d | 15 | 3 | 3 | 3 | 195  | 22.4  | 5.2   |
| Q14769             | Alpha-N-a | 6  | 3 | 3 | 3 | 639  | 72    | 6.37  |
| AOA5C2GEEIG        | c373_h    | 16 | 2 | 3 | 1 | 122  | 13.5  | 8.44  |
| AOA5C2GSJIG        | c581_h    | 16 | 2 | 4 | 1 | 122  | 13.6  | 6.04  |
| Q9HBA0             | Transient | 3  | 3 | 3 | 3 | 871  | 98.2  | 7.77  |
| Q8NBJ4             | Golgi mem | 4  | 2 | 3 | 2 | 401  | 45.3  | 4.97  |
| AOA5C2GGEIG        | c1016_    | 13 | 2 | 3 | 2 | 137  | 15    | 8.44  |
| P49458             | Signal re | 31 | 3 | 3 | 3 | 86   | 10.1  | 7.97  |
| Q9H223             | EH domain | 6  | 3 | 3 | 1 | 541  | 61.1  | 6.76  |
| B7ZLW3             | Metalloen | 3  | 3 | 3 | 1 | 1036 | 117.3 | 6.07  |
| AOA5C2GJYIG        | c758_1    | 23 | 2 | 2 | 1 | 108  | 11.8  | 7.97  |
| B2RDN9             | cDNA, FLJ | 4  | 3 | 3 | 3 | 609  | 69.7  | 6.7   |
| P62857             | 40S ribos | 17 | 1 | 2 | 1 | 69   | 7.8   | 10.7  |
| AOA1B0GTERenin     | rec       | 5  | 2 | 3 | 2 | 294  | 33    | 6.07  |
| Q0VDC6             | Peptidylp | 10 | 1 | 2 | 1 | 145  | 15.7  | 9.17  |
| E9KL48             | Epididymi | 5  | 3 | 3 | 3 | 558  | 61.4  | 7.8   |
| AOA1X7SBSHeterogen |           | 4  | 4 | 4 | 4 | 744  | 81.7  | 5.83  |
| P35237             | Serpin B6 | 13 | 3 | 3 | 3 | 376  | 42.6  | 5.27  |
| P30048             | Thioredox | 5  | 1 | 2 | 1 | 256  | 27.7  | 7.78  |
| A8K9K4             | cDNA FLJ7 | 6  | 2 | 2 | 2 | 562  | 62.2  | 7.11  |
| AOA5C2G61IGH       | c406_     | 13 | 2 | 3 | 1 | 123  | 13.4  | 7.12  |
| AOA5C2G6HIGL       | c2013     | 32 | 2 | 2 | 2 | 107  | 11.6  | 7.96  |
| Q9UNN8             | Endotheli | 9  | 2 | 4 | 2 | 238  | 26.7  | 7.18  |
| AOA024R9JNephrobla |           | 8  | 2 | 2 | 2 | 357  | 39.1  | 7.72  |
| P61160             | Actin-rel | 6  | 2 | 2 | 2 | 394  | 44.7  | 6.74  |
| AOA5C2GNJIG        | c224_h    | 19 | 2 | 2 | 1 | 125  | 13.7  | 8.44  |
| P35270             | Sepiapter | 11 | 2 | 2 | 2 | 261  | 28    | 8.05  |
| J3KQ18             | D-dopachr | 20 | 3 | 3 | 3 | 132  | 14.2  | 7.3   |
| AOA5C2GB1IGH       | + IGL     | 13 | 2 | 3 | 1 | 128  | 14    | 9.29  |
| Q14376             | UDP-glucc | 7  | 3 | 3 | 3 | 348  | 38.3  | 6.73  |
| B3KM80             | Nucleolin | 7  | 4 | 4 | 4 | 536  | 58.5  | 4.67  |
| AOA5C2GFXIG        | c914_h    | 24 | 2 | 2 | 1 | 125  | 13.8  | 8.43  |
| P27816             | Microtubu | 3  | 3 | 3 | 3 | 1152 | 120.9 | 5.43  |
| P59665             | Neutrophi | 19 | 2 | 3 | 2 | 94   | 10.2  | 6.99  |
| AOA5C2GVXIG        | c1661_    | 12 | 2 | 3 | 1 | 122  | 13.2  | 9.55  |
| AOA5C2FYRIGL       | c785_     | 21 | 3 | 3 | 2 | 107  | 11.2  | 7.99  |
| K7ESA3             | Synaptic  | 24 | 2 | 2 | 2 | 125  | 13.6  | 9.38  |

|                    |    |   |   |   |      |       |       |
|--------------------|----|---|---|---|------|-------|-------|
| AOA5C2GAEIGH + IGL | 24 | 2 | 2 | 2 | 125  | 13.3  | 9.2   |
| AOA5C2GTHIG c855_1 | 28 | 2 | 2 | 1 | 108  | 11.8  | 7.97  |
| Q8TDX6 Chondroit   | 5  | 3 | 3 | 3 | 532  | 61.3  | 8.41  |
| A4D275 Actin-rel   | 8  | 3 | 3 | 1 | 372  | 40.9  | 8.35  |
| AOA5C2GEKIGH c461_ | 15 | 2 | 6 | 1 | 120  | 13.2  | 9.29  |
| AOA5C2GL8IG c879_1 | 27 | 2 | 2 | 0 | 109  | 11.9  | 8.91  |
| O15031 Plexin-B2   | 2  | 2 | 2 | 2 | 1838 | 205   | 6.24  |
| AOA5C2GSRIG c42_li | 25 | 2 | 2 | 0 | 108  | 11.7  | 8.5   |
| Q53G02 Dolichyl-   | 11 | 1 | 2 | 1 | 113  | 12.4  | 7.87  |
| J3QKN1 FXYD doma   | 17 | 1 | 2 | 1 | 90   | 10.1  | 8.19  |
| AOA1W2PNVUncharact | 4  | 3 | 3 | 1 | 684  | 75.8  | 8.59  |
| AOA024R9ERibosomal | 32 | 3 | 3 | 3 | 115  | 12.8  | 9.63  |
| AOA5C2GLYIG c366_h | 11 | 1 | 2 | 1 | 120  | 13.4  | 7.12  |
| Q6FID4 SARA1 pro   | 6  | 1 | 2 | 1 | 198  | 22.3  | 7.03  |
| AOA5C2GA8IGH + IGL | 17 | 2 | 2 | 1 | 121  | 13.6  | 8.81  |
| AOA5C2GFEIG c222_h | 21 | 2 | 2 | 1 | 121  | 13    | 7.12  |
| O60568 Multifunc   | 4  | 3 | 3 | 3 | 738  | 84.7  | 6.05  |
| I1VE16 SEC22 ves   | 53 | 2 | 3 | 2 | 36   | 4.1   | 9.04  |
| Q9H4B7 Tubulin b   | 5  | 2 | 2 | 1 | 451  | 50.3  | 5.17  |
| P82987 ADAMTS-li   | 1  | 2 | 2 | 2 | 1691 | 188.6 | 7.83  |
| Q658P3 Metallore   | 4  | 2 | 3 | 2 | 488  | 54.6  | 8.6   |
| AOA5C2GX8IG c1039_ | 23 | 2 | 2 | 2 | 113  | 12.6  | 8.85  |
| C9JQL4 Dystrogly   | 14 | 1 | 2 | 1 | 117  | 12.6  | 5.66  |
| A8K3Q3 cDNA FLJ7   | 7  | 3 | 3 | 3 | 425  | 48.1  | 8.82  |
| Q00341 Vigilin C   | 2  | 3 | 3 | 3 | 1268 | 141.4 | 6.87  |
| AOA0S2Z3LCarbonic  | 13 | 3 | 3 | 3 | 459  | 49.7  | 4.72  |
| AOA5C2GIQIG c885_1 | 12 | 1 | 2 | 1 | 110  | 11.6  | 7.99  |
| AOA5C2GYJIG c800_1 | 23 | 2 | 2 | 1 | 108  | 11.7  | 5.06  |
| A1MMZ0 Uncharact   | 4  | 2 | 2 | 2 | 563  | 60.7  | 4.68  |
| D3DTE6 SH3 domai   | 19 | 2 | 2 | 2 | 113  | 12.7  | 5.25  |
| B4DNR3 cDNA FLJ5   | 12 | 2 | 2 | 2 | 185  | 19.8  | 6.4   |
| Q53F10 UV excisi   | 6  | 3 | 3 | 1 | 409  | 43.1  | 4.88  |
| F4ZW63 NF45 OS=H   | 9  | 2 | 2 | 2 | 390  | 43    | 5.34  |
| AOA5C2G8ZIGL c4177 | 25 | 2 | 2 | 2 | 107  | 11.4  | 8.47  |
| P39019 40S ribos   | 21 | 3 | 3 | 3 | 145  | 16.1  | 10.32 |
| AOA5C2GFFIG c500_h | 22 | 2 | 2 | 2 | 123  | 12.9  | 7.08  |
| P04271 Protein S   | 24 | 1 | 1 | 1 | 92   | 10.7  | 4.59  |
| AOA5C2GBZIGH + IGL | 23 | 2 | 2 | 1 | 108  | 11.7  | 6.55  |
| Q5VVC8 60S ribos   | 13 | 2 | 2 | 2 | 167  | 19    | 9.8   |
| O95782 AP-2 comp   | 3  | 3 | 3 | 2 | 977  | 107.5 | 7.03  |
| B4E0C7 cDNA FLJ5   | 5  | 2 | 2 | 2 | 496  | 53.8  | 6.38  |
| Q75MH1 40S ribos   | 21 | 2 | 2 | 2 | 115  | 13    | 10.98 |
| B4DXW6 cDNA FLJ5   | 7  | 3 | 3 | 3 | 454  | 52.3  | 6.48  |
| AOA5C2GI1IGH + IGL | 23 | 2 | 2 | 1 | 123  | 13.3  | 8.47  |
| H9NKY4 IFITM3 OS   | 12 | 1 | 2 | 1 | 133  | 14.6  | 6.9   |
| J3KS22 L-xylulos   | 13 | 3 | 3 | 3 | 223  | 23.8  | 8.21  |
| AOA5C2GAAIGH + IGL | 15 | 2 | 6 | 1 | 123  | 13.7  | 8     |
| B3KWI4 cDNA FLJ4   | 5  | 2 | 2 | 2 | 581  | 64.4  | 6.71  |
| AOA1BOGTGAdenylosu | 11 | 3 | 3 | 3 | 377  | 42.5  | 8.09  |
| AOA5C2G6MIGH c307_ | 18 | 2 | 2 | 1 | 123  | 13.5  | 8.78  |
| AOA5C2G7IIGL c2483 | 29 | 2 | 2 | 1 | 113  | 12.6  | 6.57  |

|                    |    |   |   |   |      |       |       |
|--------------------|----|---|---|---|------|-------|-------|
| AOA087WUL26S prote | 5  | 2 | 3 | 2 | 377  | 42.7  | 5.91  |
| Q9Y663 Heparan s   | 5  | 2 | 2 | 2 | 406  | 44.9  | 9.5   |
| HOYBX6 Ubiquitin   | 19 | 3 | 3 | 1 | 154  | 16.9  | 6.29  |
| AOA5C2GP1IG c38_he | 24 | 2 | 2 | 1 | 124  | 13.6  | 8.16  |
| AOA2U3TZVPhosphoin | 0  | 1 | 3 | 1 | 1685 | 188.6 | 7.84  |
| AOA5C2G7MIGL c3685 | 20 | 2 | 2 | 2 | 107  | 11.6  | 9.51  |
| A8K4W0 40S ribos   | 12 | 4 | 4 | 4 | 264  | 29.9  | 9.73  |
| F8VZG8 Ubiquitin   | 6  | 1 | 2 | 1 | 139  | 16.1  | 5.21  |
| AOA5C2G1YIGL c353_ | 27 | 2 | 2 | 2 | 108  | 11.6  | 8.51  |
| V9HW41 Epididymi   | 17 | 2 | 3 | 2 | 152  | 17.1  | 6.57  |
| AOA5C2G8RIGH c314_ | 22 | 3 | 3 | 3 | 127  | 14    | 8.47  |
| P22083 Alpha-(1,   | 6  | 2 | 2 | 2 | 530  | 59    | 10.01 |
| AOA5C2GMHIG c652_h | 21 | 2 | 2 | 1 | 121  | 13.4  | 8.5   |
| B5BUB5 Autoantig   | 7  | 2 | 2 | 2 | 408  | 46.8  | 7.12  |
| AOA5C2G2VIGL c3244 | 12 | 1 | 2 | 1 | 113  | 12.4  | 4.88  |
| Q5T5C7 Seryl-tRN   | 6  | 2 | 2 | 2 | 536  | 61.3  | 7.06  |
| B2MUD5 Neutrophi   | 9  | 2 | 2 | 2 | 192  | 20.6  | 8.9   |
| Q5JR94 40S ribos   | 12 | 2 | 2 | 2 | 208  | 24.2  | 10.32 |
| B4DLB8 cDNA FLJ5   | 9  | 2 | 2 | 2 | 355  | 39.9  | 8.5   |
| A8K3W7 cDNA FLJ7   | 5  | 2 | 2 | 2 | 429  | 49.9  | 6.6   |
| Q96HE7 ER01-like   | 6  | 2 | 2 | 2 | 468  | 54.4  | 5.68  |
| Q14257 Reticuloc   | 7  | 2 | 2 | 2 | 317  | 36.9  | 4.4   |
| Q96CG8 Collagen    | 7  | 2 | 2 | 2 | 243  | 26.2  | 7.99  |
| AOA087X2I26S prote | 6  | 2 | 2 | 2 | 403  | 45.8  | 7.78  |
| C9JA28 Transloco   | 8  | 1 | 2 | 1 | 174  | 20.1  | 9.44  |
| AOA140VKATestis se | 7  | 2 | 3 | 2 | 244  | 25.8  | 7.37  |
| AOA5C2GNKIG c381_1 | 25 | 2 | 2 | 1 | 107  | 11.5  | 8.5   |
| AOA5C2GSGIG c331_1 | 28 | 2 | 2 | 1 | 108  | 11.4  | 5.81  |
| AOA087WWYApolipopr | 20 | 2 | 2 | 2 | 571  | 62.5  | 5.73  |
| P54707 Potassium   | 2  | 3 | 4 | 1 | 1039 | 115.4 | 6.55  |
| AOA5C2GHEIG c677_h | 8  | 1 | 2 | 1 | 133  | 14.5  | 6.06  |
| Q15008 26S prote   | 6  | 2 | 2 | 2 | 389  | 45.5  | 5.62  |
| Q59HA3 IQ motif    | 1  | 2 | 2 | 1 | 1155 | 132.6 | 5.9   |
| AOA024R99Copine II | 8  | 3 | 3 | 2 | 537  | 60.1  | 5.85  |
| AOA140VJFMetalloth | 33 | 2 | 2 | 2 | 61   | 6.1   | 7.96  |
| Q7L9L4 MOB kinas   | 5  | 1 | 2 | 1 | 216  | 25.1  | 6.73  |
| AOA5C2G6EIGH c217_ | 9  | 1 | 2 | 1 | 125  | 13.7  | 7.28  |
| AOA4V1EJ1IgG1_IGHV | 10 | 2 | 3 | 1 | 160  | 17    | 8.47  |
| Q15323 Keratin,    | 4  | 2 | 3 | 1 | 416  | 47.2  | 4.88  |
| AOA5C2G8CIGH c184_ | 17 | 2 | 2 | 0 | 120  | 13.1  | 7.14  |
| H3BQZ9 Adenine p   | 15 | 1 | 1 | 1 | 153  | 16.6  | 5.59  |
| AOA2R8Y5MB-cell re | 8  | 2 | 2 | 2 | 211  | 24.1  | 8.06  |
| AOA5C2GHRIGH + IGL | 15 | 2 | 2 | 1 | 126  | 13.7  | 9.72  |
| AOA5C2GMQIG c581_h | 23 | 2 | 2 | 1 | 120  | 13    | 7.97  |
| Q96C23 Aldose 1-   | 8  | 2 | 2 | 2 | 342  | 37.7  | 6.65  |
| AOA5C2FUCIGL c441_ | 32 | 3 | 3 | 1 | 107  | 11.7  | 7.96  |
| A8K7T4 cDNA FLJ7   | 10 | 3 | 3 | 3 | 356  | 40.2  | 6.95  |
| AOA5C2GX8IG c1197_ | 15 | 2 | 2 | 1 | 126  | 14    | 6.52  |
| Q9Y639 Neuroplas   | 5  | 2 | 2 | 2 | 398  | 44.4  | 7.99  |
| P22413 Ectonucle   | 3  | 3 | 3 | 3 | 925  | 104.9 | 7.14  |
| MOR0H5 Urokinase   | 24 | 2 | 2 | 2 | 152  | 17    | 5.59  |

|                    |    |   |   |   |      |       |       |
|--------------------|----|---|---|---|------|-------|-------|
| AOA286YF7D-3-phosp | 9  | 2 | 2 | 2 | 276  | 29.7  | 8.02  |
| AOA5C2GU6IG c1045_ | 25 | 2 | 2 | 1 | 107  | 11.5  | 8.81  |
| D3DP46 Signal pe   | 12 | 2 | 2 | 2 | 180  | 20.3  | 8.97  |
| Q8TDQ7 Glucosami   | 9  | 2 | 2 | 1 | 276  | 31.1  | 6.95  |
| P52943 Cysteine-   | 13 | 2 | 2 | 2 | 208  | 22.5  | 8.72  |
| AOA0S2Z4ESerine/th | 5  | 3 | 3 | 3 | 511  | 57.6  | 6.3   |
| AOA087WUCOligosacc | 14 | 1 | 2 | 1 | 83   | 9.4   | 7.43  |
| AOA5C2GJSIG c1127_ | 10 | 1 | 2 | 1 | 107  | 11.5  | 8.88  |
| AOA5C2G6CIGH c117_ | 25 | 2 | 2 | 1 | 120  | 13.2  | 9.11  |
| B4DP22 Carboxype   | 5  | 2 | 2 | 2 | 402  | 45.1  | 5.96  |
| Q9UK70 Rh-null r   | 7  | 2 | 3 | 2 | 409  | 44.2  | 6.68  |
| G3V4U0 Fibulin-5   | 5  | 2 | 2 | 2 | 453  | 50.8  | 4.77  |
| AOA5C2G6FIGH c590_ | 14 | 2 | 6 | 1 | 125  | 13.8  | 8.19  |
| Q8TEP9 FLJ00144    | 8  | 2 | 2 | 2 | 255  | 28.4  | 6.18  |
| Q9BS40 Latexin C   | 4  | 1 | 2 | 1 | 222  | 25.7  | 5.78  |
| AOA5C2GT3IG c701_h | 22 | 2 | 2 | 1 | 119  | 13.2  | 8.5   |
| AOA5C2G2EIGL c3084 | 18 | 2 | 2 | 2 | 106  | 11.4  | 5.06  |
| Q13438 Protein C   | 3  | 3 | 3 | 3 | 667  | 75.5  | 4.87  |
| Q969H8 Myeloid-d   | 12 | 2 | 2 | 2 | 173  | 18.8  | 6.68  |
| F8VV59 Nucleosom   | 9  | 2 | 2 | 2 | 327  | 38    | 4.68  |
| AOA024RDYLysosomal | 4  | 2 | 2 | 2 | 417  | 44.9  | 8.75  |
| P25786 Proteasom   | 8  | 2 | 2 | 2 | 263  | 29.5  | 6.61  |
| B4DN72 cDNA FLJ5   | 3  | 2 | 2 | 1 | 486  | 53.5  | 5.66  |
| AOA5C2G49IGL c3380 | 18 | 2 | 2 | 2 | 110  | 11.5  | 8.46  |
| Q99727 Metallopr   | 9  | 2 | 2 | 2 | 224  | 25.5  | 7.8   |
| P62851 40S ribos   | 7  | 1 | 2 | 1 | 125  | 13.7  | 10.11 |
| HOYBL1 Inositol-   | 8  | 2 | 2 | 2 | 265  | 28.6  | 6.21  |
| P46063 ATP-depen   | 3  | 2 | 2 | 2 | 649  | 73.4  | 7.88  |
| AOA5C2GNUIG c227_h | 16 | 2 | 2 | 1 | 117  | 12.7  | 7.96  |
| AOA3Q8BT4Rh blood  | 2  | 1 | 2 | 1 | 417  | 45.2  | 8.5   |
| AOA5C2FXEIGL c1284 | 15 | 2 | 2 | 2 | 110  | 11.8  | 7.12  |
| B7Z507 cDNA FLJ5   | 3  | 2 | 2 | 2 | 648  | 71.5  | 5.86  |
| AOA024RDLArgininos | 7  | 2 | 2 | 2 | 464  | 51.6  | 6.48  |
| P25398 40S ribos   | 14 | 2 | 2 | 2 | 132  | 14.5  | 7.21  |
| AOA5C2GHIIGH + IGL | 15 | 2 | 2 | 1 | 123  | 13.4  | 9.2   |
| AOA5C2G02IGL c2608 | 21 | 2 | 2 | 1 | 112  | 11.7  | 7.12  |
| Q8N130 Sodium-de   | 1  | 1 | 2 | 1 | 599  | 63.5  | 8.27  |
| Q6XQN6 Nicotinat   | 6  | 2 | 2 | 2 | 538  | 57.5  | 5.68  |
| A4D2J0 SNARE pro   | 8  | 2 | 2 | 2 | 198  | 22.4  | 6.92  |
| Q13200 26S prote   | 3  | 2 | 2 | 2 | 908  | 100.1 | 5.2   |
| AOA5C2FWZIGL c1194 | 29 | 2 | 2 | 1 | 107  | 11.4  | 7.97  |
| K7EJV9 60S ribos   | 8  | 1 | 2 | 1 | 170  | 19.4  | 10.48 |
| Q53R32 Uncharact   | 14 | 2 | 2 | 2 | 177  | 19.6  | 5.94  |
| E7ETRO RuvB-like   | 8  | 2 | 2 | 2 | 315  | 34.8  | 5.76  |
| Q6FG43 Flotillin   | 7  | 2 | 2 | 2 | 379  | 41.7  | 5.29  |
| AOA5F9UJX45 kDa ca | 5  | 2 | 2 | 2 | 341  | 38.7  | 5.11  |
| AOA5C2GHCIG c493_h | 15 | 2 | 2 | 2 | 120  | 13.2  | 8.44  |
| AOA5C2GBSIGH + IGL | 15 | 2 | 2 | 1 | 111  | 12    | 6.77  |
| Q8WUJ3 Cell migr   | 2  | 2 | 2 | 2 | 1361 | 152.9 | 7.85  |
| Q1HBJ4 Mitogen-a   | 6  | 2 | 2 | 2 | 360  | 41.4  | 6.98  |
| G3V3E8 NPC intra   | 15 | 2 | 2 | 2 | 174  | 19.2  | 8.44  |

|                     |           |    |   |   |   |      |       |       |
|---------------------|-----------|----|---|---|---|------|-------|-------|
| B2R7T8              | F-actin-c | 7  | 2 | 2 | 2 | 272  | 30.6  | 6     |
| BOYIW5              | Coatomer  | 10 | 4 | 4 | 4 | 511  | 57.2  | 6.21  |
| Q9NZM1              | Myoferlin | 1  | 2 | 2 | 2 | 2061 | 234.6 | 6.18  |
| P49755              | Transmemb | 8  | 2 | 2 | 2 | 219  | 25    | 7.44  |
| AOA2R8Y8440S        | ribos     | 11 | 1 | 2 | 1 | 131  | 15.2  | 10.9  |
| Q5QPM7              | Proteasom | 5  | 1 | 2 | 1 | 263  | 28.9  | 6.44  |
| AOA0F7TOGIGHV2-70   |           | 23 | 2 | 2 | 2 | 91   | 10.3  | 6.57  |
| F8W1U5              | DUF3456 d | 20 | 1 | 2 | 1 | 82   | 9.1   | 7.25  |
| H3BT58              | Coactosin | 36 | 3 | 3 | 3 | 73   | 8.2   | 8.41  |
| P80303              | Nucleobin | 6  | 2 | 2 | 2 | 420  | 50.2  | 5.12  |
| AOA5C2GYUIG c818_1  |           | 27 | 2 | 3 | 1 | 107  | 11.7  | 8.84  |
| Q96M27              | Protein P | 7  | 2 | 2 | 2 | 445  | 46.7  | 5.83  |
| H7COV9              | Amyloid-b | 5  | 3 | 3 | 3 | 485  | 55.1  | 4.82  |
| K7ES25              | Xaa-Pro d | 3  | 2 | 2 | 2 | 512  | 56.5  | 6.25  |
| O00468              | Agrin OS= | 1  | 2 | 2 | 2 | 2068 | 217.2 | 6.39  |
| AOA5C2G6CIGH c227_  |           | 24 | 2 | 2 | 1 | 121  | 13.7  | 7.37  |
| AOA5C2GVIIIG c1327_ |           | 19 | 2 | 2 | 1 | 110  | 11.5  | 8.29  |
| Q9BUT1              | 3-hydroxy | 5  | 1 | 2 | 1 | 245  | 26.7  | 7.65  |
| AOA5C2FVLIIGL c216_ |           | 23 | 2 | 2 | 1 | 108  | 11.7  | 8.5   |
| H7C579              | Omega-ami | 7  | 2 | 2 | 2 | 265  | 28.7  | 9.35  |
| K7EJD9              | Tartrate- | 10 | 1 | 2 | 1 | 124  | 13.7  | 5.15  |
| AOA384P5SEpididymi  |           | 2  | 3 | 3 | 3 | 2452 | 282.1 | 5.34  |
| B2R9T9              | cDNA, FLJ | 4  | 1 | 2 | 1 | 243  | 26.2  | 10.67 |
| Q53GL5              | Isocitrat | 7  | 2 | 2 | 2 | 452  | 50.9  | 8.48  |
| Q00577              | Transcrip | 6  | 2 | 2 | 2 | 322  | 34.9  | 6.44  |
| A2J1N9              | Rheumatoi | 25 | 2 | 2 | 1 | 96   | 10.5  | 8.91  |
| AOA024R5HBarrier t  |           | 36 | 2 | 2 | 2 | 89   | 10.1  | 6.09  |
| AOA5C2G7YIGH c508_  |           | 18 | 2 | 2 | 1 | 120  | 13.4  | 6.52  |
| B2RD40              | cDNA, FLJ | 3  | 2 | 2 | 1 | 532  | 59.7  | 5.99  |
| AOA5C2GGTIG c938_h  |           | 18 | 2 | 2 | 1 | 124  | 13.8  | 5.45  |
| AOA024RA8Septin 7,  |           | 5  | 2 | 2 | 2 | 384  | 44.8  | 8.22  |
| AOA5C2GS5IG c325_1  |           | 27 | 2 | 2 | 2 | 111  | 11.6  | 6.52  |
| AOA5C2FWWIIGL c1439 |           | 25 | 2 | 2 | 1 | 108  | 11.9  | 7.99  |
| AOA5C2GHKIG c672_1  |           | 17 | 1 | 2 | 1 | 107  | 11.5  | 8.88  |
| AOA5C2GR6IG c1832_  |           | 16 | 2 | 2 | 1 | 121  | 13.2  | 5.39  |
| Q14914              | Prostagla | 8  | 2 | 2 | 2 | 329  | 35.8  | 8.29  |
| H9KV45              | Ubiquitin | 8  | 1 | 2 | 1 | 141  | 15.9  | 6.29  |
| Q96IR1              | RPS4X pro | 7  | 2 | 2 | 2 | 243  | 27.2  | 9.94  |
| F8WB72              | 60S ribos | 16 | 1 | 2 | 1 | 57   | 6.8   | 9.76  |
| AOA5C2GJ2IG c158_h  |           | 19 | 2 | 2 | 1 | 120  | 13.3  | 6.61  |
| Q9NTK5              | Obg-like  | 5  | 2 | 2 | 2 | 396  | 44.7  | 7.81  |
| Q70UQ0              | Inhibitor | 9  | 2 | 2 | 2 | 350  | 39.3  | 9.17  |
| AOA5C2GVFIG c1297_  |           | 17 | 1 | 1 | 1 | 107  | 11.4  | 8.84  |
| AOA5C2FTAIGL c49_1  |           | 25 | 2 | 2 | 1 | 108  | 11.5  | 7.96  |
| P62745              | Rho-relat | 27 | 3 | 4 | 2 | 196  | 22.1  | 5.24  |
| Q5VUU6              | Epididymi | 5  | 2 | 2 | 2 | 407  | 45.8  | 9.76  |
| Q00013              | 55 kDa er | 4  | 2 | 2 | 2 | 466  | 52.3  | 7.37  |
| Q53GF1              | Matrix me | 5  | 2 | 2 | 1 | 267  | 29.6  | 7.55  |
| Q9HAB8              | Phosphopa | 5  | 2 | 2 | 2 | 311  | 34    | 6.71  |
| AOA5C2GQEIG c145_h  |           | 29 | 3 | 3 | 1 | 123  | 13.5  | 7.97  |
| A8K6K4              | cDNA FLJ7 | 2  | 1 | 2 | 1 | 570  | 65.4  | 8.22  |

|                     |           |    |   |   |   |      |       |       |
|---------------------|-----------|----|---|---|---|------|-------|-------|
| P12724              | Eosinophi | 18 | 2 | 2 | 2 | 160  | 18.4  | 10.02 |
| AOA5C2GCC IGH + IGL |           | 21 | 2 | 2 | 1 | 107  | 11.7  | 8.47  |
| AOA5C2H3AIG c1476_  |           | 7  | 1 | 2 | 1 | 109  | 11.5  | 7.33  |
| P24539              | ATP synth | 6  | 2 | 2 | 2 | 256  | 28.9  | 9.36  |
| P28289              | Tropomodu | 7  | 2 | 2 | 2 | 359  | 40.5  | 5.1   |
| AOA5C2FUI IGL c469_ |           | 10 | 1 | 2 | 1 | 107  | 11.4  | 8.47  |
| AOA5C2GK9IG c423_1  |           | 22 | 2 | 2 | 1 | 113  | 12.7  | 5.01  |
| P21815              | Bone sial | 5  | 2 | 2 | 2 | 317  | 35.1  | 4.18  |
| AOA5C2GWHIG c1273_  |           | 15 | 2 | 2 | 1 | 108  | 11.3  | 7.85  |
| D6R9C5              | Osteopont | 8  | 2 | 2 | 2 | 241  | 27.1  | 4.53  |
| D6RFN0              | COP9 sign | 5  | 2 | 2 | 2 | 438  | 49.7  | 5.81  |
| BOQZ18              | Copine-1  | 3  | 2 | 2 | 2 | 542  | 59.7  | 6.04  |
| O15173              | Membrane- | 11 | 2 | 2 | 1 | 223  | 23.8  | 4.88  |
| E9PP21              | Cysteine  | 20 | 2 | 2 | 2 | 160  | 16.9  | 8.91  |
| Q03252              | Lamin-B2  | 5  | 3 | 3 | 3 | 620  | 69.9  | 5.59  |
| AOA5C2G7RIGH c557_  |           | 9  | 1 | 2 | 1 | 129  | 14.1  | 7.12  |
| AOA5C2GL7IG c66_he  |           | 15 | 2 | 2 | 2 | 124  | 13.9  | 8.78  |
| E7EQ64              | Trypsin-1 | 11 | 2 | 5 | 2 | 261  | 28.1  | 7.25  |
| O60565              | Gremlin-1 | 16 | 2 | 2 | 2 | 184  | 20.7  | 9.39  |
| Q05DB4              | HEBP2 pro | 10 | 2 | 2 | 2 | 214  | 24    | 5.38  |
| Q92820              | Gamma-glu | 4  | 2 | 2 | 2 | 318  | 35.9  | 7.11  |
| AOA2U8J8YIg heavy   |           | 22 | 2 | 2 | 1 | 102  | 11.3  | 7.96  |
| P48740              | Mannan-bi | 3  | 2 | 2 | 1 | 699  | 79.2  | 5.49  |
| Q9Y230              | RuvB-like | 5  | 2 | 2 | 2 | 463  | 51.1  | 5.64  |
| B3KX16              | cDNA FLJ4 | 6  | 2 | 2 | 2 | 372  | 43.5  | 5.86  |
| Q9BRK3              | Matrix re | 4  | 2 | 2 | 2 | 442  | 49.1  | 7.23  |
| AOA0S2Z45Serp in pe |           | 6  | 2 | 2 | 2 | 410  | 46.4  | 4.91  |
| Q8TAL6              | Fin bud i | 14 | 3 | 3 | 3 | 211  | 24.3  | 5.49  |
| AOA5C2GFQIG c672_h  |           | 24 | 2 | 2 | 1 | 115  | 12.5  | 6.65  |
| D6RJI3              | Fibrillin | 1  | 2 | 2 | 1 | 1473 | 157.6 | 4.93  |
| HOYNG3              | Signal pe | 12 | 2 | 2 | 2 | 163  | 18.6  | 9.55  |
| AOA024R4XProtein k  |           | 5  | 2 | 2 | 2 | 435  | 50    | 6.43  |
| AOA5C2GEA IGH + IGL |           | 19 | 2 | 2 | 1 | 123  | 13.4  | 8.81  |
| Q14204              | Cytoplasm | 1  | 3 | 3 | 3 | 4646 | 532.1 | 6.4   |
| AOA5C2GA6 IGH + IGL |           | 21 | 3 | 3 | 1 | 125  | 13.8  | 8.84  |
| Q9Y277              | Voltage-d | 6  | 2 | 2 | 1 | 283  | 30.6  | 8.66  |
| AOA5C2G5Y IGH c369_ |           | 20 | 2 | 2 | 2 | 122  | 13.4  | 9.36  |
| AOA384MDUDynactin   |           | 6  | 2 | 2 | 2 | 401  | 44.2  | 5.21  |
| Q8IXL6              | Extracell | 2  | 2 | 2 | 2 | 584  | 66.2  | 7.74  |
| AOA5C2FVG IGL c156_ |           | 14 | 2 | 2 | 1 | 109  | 11.4  | 8.29  |
| P20160              | Azurocidi | 8  | 2 | 2 | 2 | 251  | 26.9  | 9.5   |
| AOA5C2GA6 IGH c153_ |           | 9  | 1 | 2 | 1 | 124  | 13.6  | 8.46  |
| P17987              | T-complex | 5  | 3 | 3 | 3 | 556  | 60.3  | 6.11  |
| Q92982              | Ninjurin- | 13 | 1 | 1 | 1 | 152  | 16.3  | 6.28  |
| P35606              | Coatomer  | 4  | 3 | 3 | 3 | 906  | 102.4 | 5.27  |
| AOA5C2FY7 IGL c1842 |           | 17 | 1 | 1 | 1 | 107  | 11.5  | 8.5   |
| AOA5C2G81 IGH + IGL |           | 16 | 1 | 1 | 1 | 117  | 12.7  | 7.96  |
| O75888              | Tumor nec | 10 | 2 | 2 | 2 | 250  | 27.4  | 9.63  |
| Q9UHF5              | Interleuk | 13 | 2 | 3 | 2 | 180  | 20.4  | 9.23  |
| AOA384P5UEpididymi  |           | 11 | 3 | 3 | 3 | 249  | 28.6  | 4.09  |
| P13473              | Lysosome- | 4  | 2 | 2 | 2 | 410  | 44.9  | 5.63  |

|              |           |    |   |   |   |      |       |       |
|--------------|-----------|----|---|---|---|------|-------|-------|
| P62070       | Ras-relat | 9  | 2 | 2 | 1 | 204  | 23.4  | 6.01  |
| AOA5C2G2EIGL | c2740     | 18 | 2 | 2 | 2 | 107  | 11.9  | 8.97  |
| Q8N5L9       | Ribosomal | 9  | 3 | 3 | 3 | 293  | 31.3  | 10.24 |
| P62277       | 40S ribos | 12 | 2 | 2 | 2 | 151  | 17.2  | 10.54 |
| B2R6C4       | Receptor  | 9  | 2 | 2 | 2 | 185  | 21.1  | 8.1   |
| AOA5C2GTFIG  | c1229_    | 18 | 2 | 2 | 0 | 122  | 13.4  | 8.44  |
| Q99471       | Prefoldin | 12 | 1 | 1 | 1 | 154  | 17.3  | 6.33  |
| Q9BSV4       | SFPQ prot | 2  | 2 | 2 | 2 | 634  | 68.6  | 8.82  |
| F5H345       | Porphobil | 11 | 3 | 3 | 3 | 330  | 35.7  | 6.96  |
| AOA5C2GHTIG  | c590_h    | 21 | 2 | 2 | 1 | 120  | 13.1  | 7.96  |
| AOA5C2GKHIG  | c1062_    | 16 | 2 | 2 | 1 | 110  | 11.6  | 9.01  |
| B3KU66       | cDNA FLJ3 | 5  | 2 | 2 | 2 | 549  | 59.9  | 9.45  |
| B2RAK1       | cDNA, FLJ | 2  | 2 | 2 | 2 | 1025 | 117.3 | 5.73  |
| AOA0S2Z6FH   | Histocomp | 3  | 1 | 2 | 1 | 345  | 38    | 6.86  |
| AOA5C2G4FIGL | c4062     | 15 | 2 | 2 | 0 | 107  | 11.6  | 7.12  |
| P50914       | 60S ribos | 6  | 1 | 2 | 1 | 215  | 23.4  | 10.93 |
| O43776       | Asparagin | 3  | 2 | 2 | 2 | 548  | 62.9  | 6.25  |
| AOA5C2G83IGH | c558_     | 21 | 2 | 2 | 1 | 130  | 14.3  | 6.92  |
| Q99808       | Equilibra | 4  | 2 | 2 | 2 | 456  | 50.2  | 8.29  |
| Q14055       | Collagen  | 2  | 1 | 1 | 1 | 689  | 65.1  | 9.17  |
| AOA024R2L40S | ribos     | 7  | 2 | 2 | 2 | 295  | 32.8  | 4.87  |
| AOA5C2H1WIG  | c1918_    | 23 | 3 | 3 | 2 | 109  | 11.4  | 7.96  |
| Q8NF20       | FLJ00382  | 5  | 2 | 2 | 2 | 482  | 52.9  | 8.66  |
| AOA0A0MS5c   | AMP-depe  | 5  | 2 | 2 | 2 | 357  | 41.3  | 8.56  |
| MOR122       | Epithelia | 13 | 1 | 2 | 1 | 63   | 7.1   | 4.72  |
| AOA0U1RQK    | [Protein  | 1  | 1 | 2 | 1 | 1967 | 211.7 | 8.4   |
| O15427       | Monocarbo | 3  | 2 | 2 | 2 | 465  | 49.4  | 7.96  |
| B7Z1R3       | cDNA FLJ5 | 5  | 1 | 1 | 1 | 294  | 32.5  | 7.81  |
| J3QKM9       | Vesicle-a | 48 | 1 | 1 | 1 | 29   | 3.1   | 7.25  |
| H7C5W9       | Sarcoplas | 2  | 2 | 2 | 1 | 933  | 102.5 | 5.59  |
| E5RGR0       | Acyl-prot | 7  | 1 | 2 | 1 | 197  | 20.8  | 7.06  |
| P60827       | Complemen | 5  | 1 | 1 | 1 | 252  | 27.7  | 9.64  |
| AOA5C2FVWIGL | c1218     | 32 | 2 | 2 | 1 | 106  | 11.4  | 8.48  |
| P61457       | Pterin-4- | 16 | 2 | 2 | 2 | 104  | 12    | 6.8   |
| O00159       | Unconvent | 3  | 3 | 3 | 3 | 1063 | 121.6 | 9.41  |
| Q9GZP0       | Platelet- | 3  | 1 | 2 | 1 | 370  | 42.8  | 7.97  |
| P54851       | Epithelia | 4  | 1 | 2 | 1 | 167  | 19.2  | 7.62  |
| P48059       | LIM and s | 4  | 1 | 1 | 1 | 325  | 37.2  | 8.05  |
| Q7Z675       | Calcium-t | 2  | 2 | 2 | 1 | 994  | 109.2 | 5.1   |
| AOA5C2GJHIG  | c367_1    | 27 | 2 | 2 | 1 | 113  | 12.2  | 8.88  |
| Q13850       | Periphera | 9  | 2 | 2 | 2 | 169  | 18.5  | 8.87  |
| Q9Y6Z7       | Collectin | 5  | 1 | 1 | 1 | 277  | 30.7  | 7.33  |
| Q4G0R1       | PIBF1 pro | 1  | 1 | 2 | 1 | 698  | 83.1  | 5.53  |
| AOA140VK4    | Proteasom | 7  | 2 | 2 | 2 | 264  | 29.2  | 5.97  |
| P26583       | High mobi | 9  | 2 | 2 | 2 | 209  | 24    | 7.81  |
| O43263       | RNA editi | 1  | 1 | 2 | 1 | 699  | 75.9  | 8.59  |
| Q59HE2       | Ornithine | 7  | 1 | 1 | 1 | 281  | 30.7  | 4.84  |
| Q6NXN2       | Hypotheti | 2  | 1 | 2 | 1 | 316  | 33.1  | 11.33 |
| AOA5C2G57IGL | c3576     | 31 | 2 | 2 | 1 | 107  | 11.7  | 8.47  |
| Q96JQ0       | Protocadh | 1  | 2 | 2 | 2 | 3298 | 346   | 4.94  |
| O15127       | Secretory | 6  | 1 | 1 | 1 | 329  | 36.6  | 6.1   |



|                    |            |    |   |   |   |      |       |       |
|--------------------|------------|----|---|---|---|------|-------|-------|
| P07814             | Bifunctio  | 2  | 2 | 2 | 2 | 1512 | 170.5 | 7.33  |
| K7EPI2             | Podocan-1  | 4  | 2 | 2 | 2 | 574  | 63.2  | 9.57  |
| B4DTA2             | cDNA FLJ6  | 6  | 2 | 2 | 2 | 271  | 30.2  | 8.72  |
| J3QRU1             | Tyrosine-  | 3  | 2 | 2 | 2 | 548  | 61.3  | 6.57  |
| AOA5C2GTTIG        | c182_1     | 16 | 2 | 2 | 1 | 113  | 12.1  | 7.37  |
| AOA5C2G11IGL       | c2812      | 15 | 2 | 3 | 1 | 109  | 11.6  | 7.99  |
| B4DEN3             | cDNA FLJ6  | 8  | 1 | 1 | 1 | 193  | 22.5  | 4.79  |
| LOR599             | Alternati  | 23 | 1 | 2 | 1 | 65   | 7.7   | 9.42  |
| P24347             | Stromelys  | 1  | 1 | 2 | 1 | 488  | 54.6  | 6.87  |
| A8KAM5             | cDNA FLJ7  | 3  | 1 | 1 | 1 | 313  | 35.3  | 8.85  |
| AOA5C2GJFIG        | c1141_     | 22 | 2 | 2 | 1 | 123  | 13.5  | 7.96  |
| AOA5C2GXSIG        | c510_1     | 15 | 2 | 2 | 1 | 107  | 11.7  | 7.97  |
| H7C5I2             | Uncharact  | 27 | 1 | 1 | 1 | 55   | 6.3   | 8.5   |
| B4DEF0             | Calseques  | 4  | 1 | 1 | 1 | 353  | 40.9  | 4.34  |
| P07305             | Histone H  | 5  | 1 | 1 | 1 | 194  | 20.9  | 10.84 |
| Q00872             | Myosin-bi  | 2  | 1 | 1 | 1 | 1141 | 128.2 | 6.04  |
| E7EX73             | Eukaryoti  | 1  | 2 | 2 | 2 | 1436 | 158.5 | 5.21  |
| Q6EMK4             | Vasorin C  | 4  | 2 | 3 | 2 | 673  | 71.7  | 7.39  |
| AOA5C2GCKIGL       | c323_      | 15 | 2 | 3 | 1 | 109  | 11.4  | 7.97  |
| P30049             | ATP synth  | 8  | 1 | 1 | 1 | 168  | 17.5  | 5.49  |
| AOA5C2G68IGH       | c506_      | 15 | 1 | 1 | 1 | 126  | 13.7  | 7.81  |
| B3KQB4             | PRA1 fami  | 16 | 2 | 2 | 2 | 188  | 21.5  | 9.77  |
| AOA3B3IUCAlpha-gal |            | 3  | 2 | 2 | 2 | 470  | 53.2  | 5.86  |
| Q99542             | Matrix me  | 3  | 1 | 1 | 1 | 508  | 57.3  | 7.59  |
| Q01459             | Di-N-acet  | 4  | 1 | 1 | 1 | 385  | 43.7  | 6.64  |
| Q53S24             | Prothymos  | 13 | 1 | 1 | 1 | 110  | 12.1  | 3.79  |
| AOA5C2G84IGL       | c3795      | 22 | 1 | 1 | 1 | 111  | 12.2  | 7.99  |
| Q9UN70             | Protocadh  | 2  | 1 | 1 | 1 | 934  | 101   | 5.21  |
| AOA5C2GE9IGH       | c331_      | 14 | 2 | 2 | 1 | 125  | 14    | 5     |
| G9J6Q6             | GSTT2 OS=  | 5  | 1 | 1 | 1 | 244  | 27.5  | 6.4   |
| AOA5C2GEHIG        | c1262_     | 23 | 2 | 6 | 1 | 121  | 13.2  | 8.88  |
| Q5VVQ6             | Ubiquitin  | 5  | 1 | 1 | 1 | 348  | 38.3  | 6.11  |
| B3KMV5             | cDNA FLJ1  | 1  | 1 | 1 | 1 | 1104 | 122.8 | 5.85  |
| B4E368             | cDNA FLJ6  | 11 | 2 | 2 | 1 | 223  | 24.5  | 9.7   |
| Q9P1F3             | Costars f  | 16 | 1 | 1 | 1 | 81   | 9.1   | 6.29  |
| AOA087WSZ          | Immunoglo  | 16 | 1 | 1 | 1 | 117  | 12.8  | 7.74  |
| Q9NR45             | Sialic ac  | 4  | 1 | 1 | 1 | 359  | 40.3  | 6.74  |
| B2R773             | cDNA, FLJ  | 6  | 1 | 1 | 1 | 244  | 26.4  | 5.74  |
| Q8TER0             | Sushi, ni  | 1  | 1 | 1 | 1 | 1413 | 152.1 | 6.98  |
| D6W5Y5             | Cold indu  | 4  | 1 | 1 | 1 | 297  | 31.9  | 9.61  |
| AOA5C2GPRIG        | c1395_     | 13 | 1 | 1 | 1 | 120  | 13.1  | 7.88  |
| AOA5C2FYVIGL       | c1854      | 29 | 2 | 2 | 1 | 113  | 12.5  | 9.1   |
| AOA5C2GKAIG        | c293_h     | 24 | 2 | 2 | 2 | 123  | 13.6  | 5.38  |
| C9JNV3             | U6 snRNA-  | 21 | 1 | 1 | 1 | 77   | 8.3   | 5.24  |
| Q5TD07             | Ribosyl di | 9  | 1 | 1 | 1 | 193  | 21.5  | 6.52  |
| B3KNX7             | Non-speci  | 3  | 1 | 1 | 1 | 522  | 58.2  | 5.49  |
| AOA5C2FW8IGL       | c1082      | 10 | 1 | 1 | 1 | 107  | 11.6  | 7.97  |
| AOA5C2GMHIG        | c556_h     | 11 | 1 | 2 | 1 | 131  | 14.3  | 8.75  |
| D6RAR4             | Hepatocyt  | 2  | 1 | 1 | 1 | 662  | 71.4  | 7.05  |
| P81605             | Dermcidin  | 10 | 1 | 1 | 1 | 110  | 11.3  | 6.54  |
| P34820             | Bone morp  | 4  | 1 | 1 | 1 | 402  | 44.7  | 8.41  |

|           |           |    |   |   |   |      |       |       |
|-----------|-----------|----|---|---|---|------|-------|-------|
| V9HW50    | All-trans | 2  | 1 | 1 | 1 | 375  | 39.8  | 8.19  |
| E9PH05    | Protein F | 12 | 1 | 1 | 1 | 141  | 15.9  | 9.95  |
| B7Z2N4    | cDNA FLJ5 | 2  | 1 | 1 | 1 | 981  | 109.6 | 6.14  |
| B1AKP2    | Tetraspan | 6  | 1 | 1 | 1 | 187  | 20.6  | 7.8   |
| Q6FHF5    | Prolifera | 7  | 1 | 2 | 1 | 261  | 28.7  | 4.69  |
| P29692    | Elongatio | 4  | 1 | 1 | 1 | 281  | 31.1  | 5.01  |
| AOA5C2H1G | IG c856_1 | 12 | 1 | 1 | 1 | 112  | 12.2  | 5.96  |
| I6L8B7    | Fatty aci | 9  | 1 | 1 | 1 | 101  | 11.3  | 6.07  |
| O95810    | Caveolae- | 3  | 1 | 1 | 1 | 425  | 47.1  | 5.21  |
| AOA5C2GHE | IG c288_1 | 11 | 1 | 1 | 1 | 106  | 11.6  | 8.44  |
| AOA5C2GK5 | IG c101_h | 13 | 1 | 1 | 1 | 124  | 13.8  | 8.78  |
| Q6SES1    | Major pri | 4  | 1 | 1 | 1 | 277  | 30    | 9     |
| O00187    | Mannan-bi | 3  | 2 | 2 | 2 | 686  | 75.7  | 5.63  |
| B4E1C4    | cDNA FLJ5 | 3  | 1 | 1 | 1 | 421  | 46    | 7.93  |
| AOA5C2GST | IG c1754_ | 7  | 1 | 1 | 1 | 130  | 14.2  | 4.54  |
| P17050    | Alpha-N-a | 4  | 1 | 1 | 1 | 411  | 46.5  | 5.19  |
| B4E324    | cDNA FLJ6 | 3  | 1 | 1 | 1 | 480  | 54.2  | 6.98  |
| J3QQM1    | 26S prote | 5  | 1 | 1 | 1 | 263  | 29.3  | 6.18  |
| B7ZB67    | Serine/th | 3  | 1 | 1 | 1 | 299  | 34.1  | 6.16  |
| Q96GX3    | KIAA0118  | 6  | 1 | 1 | 1 | 175  | 19.3  | 6.9   |
| B4E1V6    | cDNA FLJ5 | 3  | 1 | 1 | 1 | 273  | 32    | 5.66  |
| O94903    | Pyridoxal | 3  | 1 | 1 | 1 | 275  | 30.3  | 7.5   |
| AOA5C2G3G | IGL c3464 | 17 | 1 | 1 | 1 | 108  | 11.7  | 8.94  |
| A8K865    | cDNA FLJ7 | 6  | 1 | 1 | 1 | 259  | 28.5  | 7.99  |
| G5E971    | Collagena | 3  | 1 | 1 | 1 | 489  | 55.8  | 5.97  |
| A1KY36    | Cell prol | 3  | 2 | 2 | 2 | 745  | 73.4  | 9.61  |
| AOA024R2G | Myosin, l | 10 | 2 | 2 | 2 | 195  | 21.9  | 5.1   |
| K7EMH1    | 60S ribos | 15 | 1 | 1 | 1 | 89   | 10.4  | 9.66  |
| AOA5C2GLA | IG c474_h | 7  | 1 | 1 | 1 | 133  | 14.5  | 10.59 |
| Q8TAS0    | ATP synth | 4  | 1 | 1 | 1 | 291  | 32.2  | 9.11  |
| AOA5C2GTG | IG c1800_ | 15 | 1 | 2 | 1 | 128  | 13.7  | 6.28  |
| Q07092    | Collagen  | 1  | 2 | 2 | 2 | 1604 | 157.7 | 7.84  |
| E9PPH5    | Acidic le | 14 | 1 | 1 | 1 | 114  | 13.1  | 4.22  |
| P48047    | ATP synth | 5  | 1 | 1 | 1 | 213  | 23.3  | 9.96  |
| E9KL30    | Proteasom | 3  | 1 | 1 | 1 | 277  | 29.9  | 7.68  |
| AOA5C2GHS | IG c1327_ | 16 | 1 | 1 | 1 | 110  | 11.8  | 8.48  |
| Q8N6Y2    | Leucine-r | 2  | 1 | 1 | 1 | 441  | 51.8  | 8.24  |
| AOA024RA9 | Microfibr | 5  | 1 | 1 | 1 | 183  | 20.8  | 4.97  |
| V9HWF9    | Epididymi | 6  | 2 | 2 | 2 | 308  | 33.4  | 5.69  |
| H7C2W9    | 60S ribos | 6  | 1 | 1 | 1 | 108  | 12.8  | 11    |
| H0Y614    | Ubiquitin | 19 | 1 | 1 | 1 | 81   | 8.7   | 9.47  |
| P36578    | 60S ribos | 5  | 2 | 2 | 2 | 427  | 47.7  | 11.06 |
| A6PVX3    | 26S prote | 8  | 1 | 1 | 1 | 203  | 21.8  | 7.11  |
| AOA5C2G3Z | IGL c4011 | 17 | 1 | 1 | 1 | 108  | 11.7  | 8.84  |
| B4DP31    | Phosphori | 5  | 1 | 1 | 1 | 282  | 31.2  | 6.95  |
| Q5QTS3    | FWP004 OS | 4  | 1 | 1 | 1 | 203  | 23.6  | 11.02 |
| Q86XS5    | Angiopoie | 3  | 1 | 1 | 1 | 388  | 44.1  | 6.6   |
| Q96QK1    | Vacuolar  | 2  | 1 | 1 | 1 | 796  | 91.6  | 5.49  |
| AOA5C2G87 | IGL c220_ | 14 | 1 | 1 | 1 | 107  | 11.7  | 7.28  |
| E9PC71    | Hippocalc | 4  | 1 | 1 | 1 | 175  | 20.3  | 5.68  |
| AOA5C2GPH | IG c1282_ | 9  | 1 | 1 | 1 | 120  | 13.1  | 7.3   |

|                    |    |   |   |   |      |       |       |
|--------------------|----|---|---|---|------|-------|-------|
| AOA5C2GT6IG c1690_ | 15 | 1 | 1 | 1 | 124  | 13.3  | 8.28  |
| AOA5C2FUEIGL c362_ | 7  | 1 | 1 | 1 | 110  | 11.6  | 7.24  |
| AOA5C2GACIGH + IGL | 8  | 1 | 1 | 1 | 118  | 12.8  | 6.58  |
| Q9BY74 Ribosomal   | 9  | 1 | 1 | 1 | 142  | 15.6  | 10.04 |
| AOA5C2GMSIG c488_h | 16 | 1 | 1 | 1 | 122  | 13.1  | 7.12  |
| K7ERW9 Arsenical   | 5  | 1 | 1 | 1 | 200  | 21.9  | 4.81  |
| J3KT73 60S ribos   | 19 | 1 | 1 | 1 | 64   | 7.6   | 9.99  |
| O75106 Retina-sp   | 1  | 1 | 1 | 1 | 756  | 83.6  | 7.03  |
| Q9Y5Y7 Lymphatic   | 2  | 1 | 1 | 1 | 322  | 35.2  | 8.28  |
| O95373 Importin-   | 1  | 1 | 1 | 1 | 1038 | 119.4 | 4.82  |
| C9JJV6 Myeloid-a   | 7  | 1 | 1 | 1 | 146  | 15.9  | 8.65  |
| A2VCM6 PTMS prot   | 12 | 1 | 1 | 1 | 101  | 11.4  | 4.22  |
| B7Z2B0 cDNA FLJ5   | 2  | 1 | 1 | 1 | 533  | 60    | 7.27  |
| E7ENY0 Alpha-add   | 2  | 1 | 1 | 1 | 663  | 73.4  | 6.55  |
| AOA5C2G61IGH c127_ | 16 | 2 | 2 | 1 | 121  | 13.1  | 6.52  |
| AOA5C2FVCIGL c719_ | 15 | 1 | 1 | 1 | 106  | 11.3  | 7.99  |
| AOA5C2GUKIG c1191_ | 16 | 2 | 3 | 1 | 125  | 13.8  | 5.1   |
| K7ELC7 60S ribos   | 13 | 2 | 2 | 2 | 144  | 16.5  | 10.58 |
| P11717 Cation-in   | 0  | 1 | 1 | 1 | 2491 | 274.2 | 5.94  |
| MOQZR9 ELAV-like   | 8  | 1 | 1 | 1 | 153  | 17.1  | 8.66  |
| Q7Z3T9 Neuropili   | 2  | 1 | 1 | 1 | 931  | 104.7 | 5.22  |
| Q9H3N1 Thioredox   | 3  | 1 | 1 | 1 | 280  | 31.8  | 4.98  |
| P13224 Platelet    | 10 | 2 | 2 | 2 | 206  | 21.7  | 9.31  |
| AOA5C2G5EIGH c199_ | 7  | 1 | 1 | 1 | 130  | 14.2  | 7.11  |
| P35998 26S prote   | 5  | 2 | 2 | 2 | 433  | 48.6  | 5.95  |
| H3BPY5 Calcium-r   | 6  | 1 | 1 | 1 | 125  | 13.5  | 8.19  |
| K7ESL0 Spermidin   | 11 | 1 | 1 | 1 | 119  | 13    | 6.76  |
| P61201 COP9 sign   | 2  | 1 | 1 | 1 | 443  | 51.6  | 5.53  |
| F8WF71 Exportin-   | 17 | 1 | 1 | 1 | 82   | 9.6   | 6.11  |
| Q9BRW0 CD58 prot   | 4  | 1 | 1 | 1 | 240  | 27    | 6.09  |
| AOA5C2GPXIG c923_h | 16 | 1 | 1 | 1 | 122  | 13.3  | 7.12  |
| Q6ZNX5 cDNA FLJ2   | 5  | 1 | 1 | 1 | 165  | 17.7  | 7.52  |
| P12645 Bone morp   | 2  | 1 | 1 | 1 | 472  | 53.3  | 9.58  |
| E5RJE1 Protein F   | 14 | 1 | 1 | 1 | 93   | 10.4  | 4.88  |
| E9PP73 Coatomer    | 2  | 1 | 1 | 1 | 485  | 55.4  | 6.43  |
| I3L303 40S ribos   | 17 | 1 | 1 | 1 | 52   | 6     | 11    |
| Q5T7F0 Neuropili   | 2  | 1 | 1 | 1 | 704  | 79    | 5.86  |
| AOA5C2G73IGL c254_ | 8  | 1 | 1 | 1 | 107  | 11.6  | 7.96  |
| AOA5C2FZ4IGL c925_ | 14 | 1 | 1 | 1 | 111  | 11.7  | 7.12  |
| V9HW01 Epididymi   | 6  | 1 | 1 | 1 | 157  | 17.8  | 11.25 |
| AOA5C2FVXIGL c1079 | 25 | 2 | 2 | 1 | 108  | 11.7  | 6.57  |
| Q5JTB6 Placenta-   | 11 | 1 | 1 | 1 | 97   | 10.3  | 4.92  |
| Q92522 Histone H   | 6  | 1 | 1 | 1 | 213  | 22.5  | 10.76 |
| A8K7R3 cDNA FLJ7   | 2  | 1 | 1 | 1 | 560  | 62.6  | 6.64  |
| AOA5C2GMZIG c855_h | 16 | 1 | 1 | 1 | 120  | 13    | 5.14  |
| AOA5C2FY5IGL c1106 | 14 | 1 | 1 | 1 | 111  | 11.7  | 5.94  |
| AOA5C2GS9IG c1793_ | 10 | 1 | 1 | 1 | 120  | 13.2  | 4.75  |
| AOA5C2GTEIG c617_1 | 17 | 1 | 1 | 1 | 109  | 11.8  | 8.53  |
| P26373 60S ribos   | 5  | 1 | 1 | 1 | 211  | 24.2  | 11.65 |
| AOA087XOXGrowth/di | 3  | 1 | 1 | 1 | 353  | 39.3  | 9.91  |
| B4DP80 NAD(P)H-h   | 4  | 1 | 2 | 1 | 307  | 33.6  | 8.73  |

|                    |    |   |   |   |      |       |       |
|--------------------|----|---|---|---|------|-------|-------|
| AOA5C2GB4IGH + IGL | 9  | 1 | 1 | 1 | 125  | 13.9  | 8.43  |
| Q6FHC9 STC2 prot   | 6  | 2 | 2 | 2 | 302  | 33.2  | 7.3   |
| J3KRX5 60S ribos   | 8  | 1 | 1 | 1 | 174  | 20.2  | 10.1  |
| P54296 Myomesin-   | 1  | 1 | 1 | 1 | 1465 | 164.8 | 6.19  |
| AOA5C2GU1IG c891_1 | 29 | 2 | 2 | 1 | 107  | 11.8  | 8.88  |
| AOA345WIRCytochrom | 4  | 1 | 1 | 1 | 227  | 25.5  | 4.82  |
| Q86YZ3 Hornerin    | 2  | 1 | 1 | 1 | 2850 | 282.2 | 10.04 |
| B3KXH8 cDNA FLJ4   | 4  | 1 | 1 | 1 | 395  | 45.6  | 8.15  |
| Q32Q75 Eukaryoti   | 5  | 1 | 1 | 1 | 217  | 25.1  | 6.15  |
| B3KQQ7 cDNA PSEC   | 3  | 1 | 1 | 1 | 415  | 47.1  | 7.2   |
| AOA2R8Y6J60S ribos | 3  | 1 | 1 | 1 | 238  | 27    | 9.13  |
| Q96CT6 C12orf10    | 4  | 1 | 1 | 1 | 322  | 36.3  | 8.06  |
| Q96AG4 Leucine-r   | 3  | 1 | 1 | 1 | 307  | 34.9  | 9.57  |
| Q9NSD9 Phenylala   | 2  | 1 | 1 | 1 | 589  | 66.1  | 6.84  |
| Q3T1A9 Cellular    | 8  | 1 | 1 | 1 | 130  | 14.9  | 8.75  |
| Q96FJ2 Dynein li   | 8  | 1 | 1 | 1 | 89   | 10.3  | 7.37  |
| Q567U8 COPS7A pr   | 6  | 1 | 1 | 1 | 248  | 27.3  | 5.49  |
| A3KFI1 Neuroblas   | 5  | 1 | 1 | 1 | 128  | 14    | 6.48  |
| AOA5C2GJ1IG c501_h | 9  | 1 | 1 | 1 | 126  | 13.6  | 7.97  |
| P05496 ATP synth   | 5  | 1 | 1 | 1 | 136  | 14.3  | 9.74  |
| B2R7R4 cDNA, FLJ   | 1  | 1 | 1 | 1 | 671  | 76    | 8.98  |
| Q9Y5P6 Mannose-1   | 7  | 2 | 2 | 2 | 360  | 39.8  | 6.61  |
| J3KRL0 Unconvent   | 3  | 1 | 1 | 1 | 436  | 49.7  | 7.01  |
| H7C2D6 Mesenceph   | 21 | 1 | 1 | 1 | 71   | 7.8   | 7.85  |
| Q6N028 Uncharact   | 2  | 1 | 1 | 1 | 529  | 61.4  | 5.62  |
| AOA024RDHSEC31-lik | 2  | 1 | 1 | 1 | 1181 | 129   | 7.4   |
| AOA5C2GVWIG c1581_ | 7  | 1 | 1 | 1 | 111  | 11.5  | 5.94  |
| P20929 Nebulin C   | 1  | 1 | 1 | 1 | 6669 | 772.4 | 9.07  |
| Q9Y5F9 Protocadh   | 1  | 1 | 1 | 1 | 930  | 101   | 5.26  |
| AOA5C2G07IGL c2658 | 14 | 1 | 1 | 1 | 111  | 11.6  | 7.11  |
| P43034 Platelet-   | 5  | 2 | 2 | 2 | 410  | 46.6  | 7.37  |
| Q6FIF1 DNAJB9 pr   | 6  | 1 | 1 | 1 | 223  | 25.5  | 8.27  |
| AOA0A6YYAProtein T | 10 | 2 | 2 | 2 | 188  | 21.2  | 6.2   |
| AOA5C2GBKIGH + IGL | 11 | 1 | 1 | 1 | 123  | 13.3  | 9.33  |
| B7Z7Q6 cDNA FLJ5   | 5  | 2 | 2 | 2 | 391  | 43.9  | 6.3   |
| O75063 Glycosami   | 2  | 1 | 1 | 1 | 409  | 46.4  | 6.87  |
| AOA5C2FW9IGL c924_ | 7  | 1 | 1 | 1 | 110  | 11.5  | 8.63  |
| B4DNA0 cDNA FLJ5   | 3  | 1 | 1 | 1 | 430  | 47.4  | 6.84  |
| AOA0A0MQVFibroblas | 3  | 1 | 1 | 1 | 288  | 30.7  | 11.18 |
| Q99747 Gamma-sol   | 5  | 1 | 1 | 1 | 312  | 34.7  | 5.41  |
| AOA024R8LWW domain | 4  | 1 | 1 | 1 | 261  | 28.1  | 5.91  |
| AOA140VK7Testis se | 3  | 1 | 1 | 1 | 314  | 34.3  | 8.85  |
| AOA286YFLPalmitoyl | 3  | 1 | 1 | 1 | 323  | 35.7  | 8.44  |
| B4DH43 cDNA FLJ5   | 2  | 1 | 1 | 1 | 830  | 82.7  | 8.56  |
| P29373 Cellular    | 7  | 1 | 1 | 1 | 138  | 15.7  | 5.4   |
| P41091 Eukaryoti   | 3  | 1 | 1 | 1 | 472  | 51.1  | 8.4   |
| E9PQ80 Charged m   | 9  | 1 | 1 | 1 | 213  | 24.2  | 5.19  |
| B2R4C9 cDNA, FLJ   | 8  | 1 | 1 | 1 | 102  | 11.2  | 9.52  |
| B4DPZ4 cDNA FLJ6   | 3  | 1 | 1 | 1 | 458  | 52.7  | 6.7   |
| AOA5C2G4CIGL c4028 | 14 | 1 | 1 | 1 | 112  | 11.6  | 5.91  |
| P37108 Signal re   | 6  | 1 | 1 | 1 | 136  | 14.6  | 10.04 |

|                     |           |    |   |   |   |      |       |       |
|---------------------|-----------|----|---|---|---|------|-------|-------|
| F8VYN9              | ADP-ribos | 6  | 1 | 1 | 1 | 194  | 21.8  | 6.77  |
| Q96HC4              | PDZ and L | 2  | 1 | 1 | 1 | 596  | 63.9  | 8.21  |
| B4DIL7              | cDNA FLJ5 | 4  | 1 | 1 | 1 | 212  | 24.3  | 8.88  |
| F8VXI7              | Dynein li | 52 | 1 | 1 | 1 | 42   | 4.8   | 4.72  |
| AOA5C2G84IGL c3937  |           | 14 | 1 | 1 | 1 | 107  | 11.4  | 7.96  |
| Q13103              | Secreted  | 6  | 1 | 1 | 1 | 211  | 24.3  | 8.32  |
| Q53GY9              | Cation-de | 5  | 1 | 1 | 1 | 277  | 31    | 5.83  |
| Q14703              | Membrane- | 1  | 1 | 1 | 1 | 1052 | 117.7 | 8.75  |
| B3KXS3              | cDNA FLJ4 | 5  | 1 | 1 | 1 | 260  | 29.4  | 9.61  |
| AOA024RASHeme bind  |           | 11 | 2 | 2 | 2 | 189  | 21.1  | 5.8   |
| C9IZG4              | Protein C | 10 | 1 | 1 | 1 | 135  | 14.4  | 5.45  |
| AOA5C2G7XIGH + IGL  |           | 8  | 1 | 1 | 1 | 119  | 13.3  | 9.13  |
| P00167              | Cytochrom | 10 | 1 | 1 | 1 | 134  | 15.3  | 4.96  |
| K7EKQ2              | Hsp90 co- | 4  | 1 | 1 | 1 | 353  | 41.6  | 6.64  |
| Q53TN4              | Cytochrom | 3  | 1 | 1 | 1 | 286  | 31.6  | 8.76  |
| Q14554              | Protein d | 2  | 1 | 1 | 1 | 519  | 59.6  | 7.91  |
| B3KR70              | cDNA FLJ3 | 5  | 2 | 2 | 2 | 430  | 47.7  | 6.13  |
| AOA1BOGVNUroporphy  |           | 5  | 1 | 1 | 1 | 298  | 33.2  | 7.37  |
| O43916              | Carbohydr | 5  | 1 | 1 | 1 | 411  | 46.7  | 8.97  |
| Q53H96              | Pyrroline | 4  | 1 | 1 | 1 | 274  | 28.6  | 7.72  |
| P48788              | Troponin  | 9  | 1 | 1 | 1 | 182  | 21.3  | 8.73  |
| Q86YW5              | Trem-like | 5  | 1 | 1 | 1 | 311  | 32.7  | 6.05  |
| Q5VZ73              | C-C motif | 8  | 1 | 1 | 1 | 124  | 13.6  | 10.05 |
| AOA5C2GP9IG c432_h  |           | 5  | 1 | 1 | 1 | 128  | 14.1  | 6.77  |
| MOR1D6              | DnaJ homc | 13 | 1 | 1 | 1 | 91   | 10.3  | 8.19  |
| AOA5C2H3EIG c1526_  |           | 8  | 1 | 1 | 1 | 110  | 11.4  | 6.52  |
| Q4VAQ1              | COL8A2 pr | 11 | 1 | 1 | 1 | 114  | 12.8  | 7.43  |
| Q11201              | CMP-N-ace | 4  | 1 | 1 | 1 | 340  | 39.1  | 9.09  |
| AOA5C2GR9IG c4_lig  |           | 8  | 1 | 1 | 1 | 108  | 11.9  | 6.6   |
| AOA5C2GCFIGH + IGL  |           | 15 | 2 | 2 | 1 | 122  | 13.3  | 8.84  |
| Q14427              | GM2-activ | 8  | 1 | 1 | 1 | 103  | 11.1  | 4.75  |
| O76076              | CCN famil | 7  | 2 | 2 | 2 | 250  | 26.8  | 7.88  |
| AOA024R7CDynamain 2 |           | 3  | 1 | 1 | 1 | 460  | 51.8  | 7.88  |
| Q9UHL4              | Dipeptidy | 2  | 1 | 1 | 1 | 492  | 54.3  | 6.32  |
| Q08495              | Dematin C | 3  | 1 | 2 | 1 | 405  | 45.5  | 8.88  |
| AOA5C2G75IGL c274_  |           | 7  | 1 | 1 | 1 | 109  | 11.7  | 5.31  |
| J3KR44              | Ubiquitin | 4  | 1 | 1 | 1 | 272  | 31.4  | 5     |
| Q15631              | Translin  | 3  | 1 | 1 | 1 | 228  | 26.2  | 6.44  |
| B2RA15              | Inhibitor | 3  | 1 | 1 | 1 | 280  | 32.7  | 8.05  |
| P48556              | 26S prote | 2  | 1 | 1 | 1 | 350  | 39.6  | 9.7   |
| Q9Y2S6              | Translati | 14 | 1 | 1 | 1 | 64   | 7.1   | 9.99  |
| AOA5C2GFFIGH + IGL  |           | 9  | 1 | 1 | 1 | 125  | 13.9  | 6.62  |
| AOA5C2G1AIGL c2929  |           | 15 | 1 | 1 | 1 | 110  | 11.4  | 7.12  |
| Q96KN2              | Beta-Ala- | 3  | 1 | 1 | 1 | 507  | 56.7  | 5.3   |
| AOA2Y9CYFIg heavy   |           | 26 | 2 | 3 | 1 | 104  | 11.6  | 8.46  |
| AOA5C2GDNIG c680_h  |           | 6  | 1 | 1 | 1 | 126  | 14    | 8.98  |
| AOA087WZ5Tumor pro  |           | 7  | 1 | 1 | 1 | 152  | 16.3  | 4.92  |
| AOA5C2G94IGH + IGL  |           | 25 | 2 | 2 | 1 | 121  | 13    | 5.01  |
| D6RE99              | Histidine | 9  | 1 | 1 | 1 | 78   | 8.6   | 5.39  |
| AOA3B3ISVERI1 exor  |           | 4  | 1 | 1 | 1 | 315  | 34.7  | 7.47  |
| Q6B514              | Septin 6  | 4  | 2 | 2 | 2 | 438  | 50.2  | 6.86  |

|            |           |    |   |   |   |      |       |      |
|------------|-----------|----|---|---|---|------|-------|------|
| 075976     | Carboxype | 1  | 1 | 1 | 1 | 1380 | 152.8 | 6.05 |
| Q8IWH1     | Similar t | 3  | 1 | 1 | 1 | 500  | 56.1  | 8.5  |
| Q9UM02     | Prolyl en | 1  | 1 | 1 | 1 | 710  | 80.7  | 5.86 |
| A0A1B0GUEA | Acid cera | 3  | 1 | 1 | 1 | 330  | 37.4  | 6.79 |
| P62081     | 40S ribos | 4  | 1 | 1 | 1 | 194  | 22.1  | 10.1 |
| C9JE88     | Carboxype | 6  | 1 | 1 | 1 | 147  | 16.6  | 6.27 |
| P48960     | CD97 anti | 2  | 1 | 1 | 1 | 835  | 91.8  | 6.87 |
| P27144     | Adenylate | 4  | 1 | 1 | 1 | 223  | 25.3  | 8.4  |
| F5H608     | ATP synth | 9  | 1 | 1 | 1 | 81   | 8.9   | 9.36 |
| Q6UWF9     | Protein F | 5  | 1 | 1 | 1 | 173  | 19.7  | 8.47 |
| A0A077H1I  | VLCAD (Fr | 23 | 1 | 1 | 1 | 66   | 6.8   | 9.82 |
| A0A5C2GJ9  | IG c1326_ | 22 | 1 | 1 | 1 | 107  | 11.4  | 8.5  |
| K7EL99     | Tubulin-f | 6  | 1 | 1 | 1 | 133  | 14.6  | 6.52 |
| B3KPI8     | cDNA FLJ3 | 2  | 1 | 1 | 1 | 547  | 62    | 5.25 |
| P05106     | Integrin  | 1  | 1 | 1 | 1 | 788  | 87    | 5.24 |
| P30040     | Endoplasm | 8  | 2 | 2 | 2 | 261  | 29    | 7.31 |
| Q8TB73     | Protein N | 1  | 1 | 1 | 1 | 568  | 64.6  | 8.94 |
| A0A5C2GC7  | IGL c311_ | 10 | 1 | 1 | 1 | 106  | 11.6  | 8.47 |
| F5GZQ3     | Trifuncti | 2  | 1 | 1 | 1 | 459  | 49.6  | 9.42 |
| A0A5C2FXL  | IGL c1325 | 8  | 1 | 1 | 1 | 109  | 11.5  | 5.26 |
| B2RD19     | cDNA, FLJ | 5  | 1 | 1 | 1 | 309  | 34.3  | 7.33 |
| A0A5C2FX1  | IGL c680_ | 17 | 1 | 1 | 1 | 107  | 11.8  | 8.44 |
| P28838     | Cytosol a | 2  | 1 | 1 | 1 | 519  | 56.1  | 7.93 |
| E7EM64     | COP9 sign | 2  | 1 | 1 | 1 | 326  | 36    | 5.73 |
| 000571     | ATP-depen | 2  | 1 | 1 | 1 | 662  | 73.2  | 7.18 |
| A0A5C2GFU  | IG c675_h | 16 | 1 | 1 | 1 | 121  | 12.9  | 5.11 |
| Q5T6V7     | Queuosine | 5  | 1 | 1 | 1 | 200  | 23.3  | 6.3  |
| Q9UBQ5     | Eukaryoti | 6  | 1 | 1 | 1 | 218  | 25    | 4.93 |
| P36406     | E3 ubiqui | 2  | 1 | 1 | 1 | 574  | 64    | 6.38 |
| Q8NBL1     | Protein C | 4  | 1 | 1 | 1 | 392  | 46.2  | 8.72 |
| A0A5C2FVE  | IGL c30_1 | 11 | 1 | 1 | 1 | 107  | 11.6  | 7.39 |
| F8WF14     | Carboxyli | 2  | 1 | 1 | 1 | 562  | 63.4  | 7.84 |
| A0A5C2G6C  | IGH c400_ | 8  | 1 | 1 | 1 | 125  | 13.8  | 8.76 |
| Q13098     | COP9 sign | 2  | 1 | 1 | 1 | 491  | 55.5  | 6.74 |
| A0A5C2FWS  | IGL c1548 | 7  | 1 | 1 | 1 | 111  | 11.6  | 8.31 |
| A0A5C2FX4  | IGL c1539 | 8  | 1 | 1 | 1 | 107  | 11.7  | 6.55 |
| MOQYI6     | NEDD8-con | 10 | 1 | 1 | 1 | 114  | 12.9  | 8.82 |
| A0A5C2GUJ  | IG c187_h | 7  | 1 | 1 | 1 | 127  | 14.1  | 9.13 |
| P61086     | Ubiquitin | 6  | 1 | 1 | 1 | 200  | 22.4  | 5.44 |
| Q14324     | Myosin-bi | 1  | 1 | 1 | 1 | 1141 | 128   | 7.52 |
| A0A5C2GXE  | IG c1623_ | 8  | 1 | 1 | 1 | 113  | 12.5  | 5.36 |
| Q5U000     | Cathepsin | 3  | 1 | 1 | 1 | 303  | 33.8  | 7.11 |
| A0A140VJG  | Catechol  | 3  | 1 | 1 | 1 | 271  | 30    | 5.47 |
| A0A5C2FVX  | IGL c972_ | 8  | 1 | 1 | 1 | 110  | 11.6  | 6.48 |
| B3KXK5     | cDNA FLJ4 | 1  | 1 | 1 | 1 | 578  | 62.2  | 5.11 |
| P25815     | Protein S | 11 | 1 | 1 | 1 | 95   | 10.4  | 4.88 |
| Q7Z591     | Microtubu | 1  | 1 | 3 | 1 | 1439 | 155   | 6.32 |
| P49327     | Fatty aci | 0  | 1 | 1 | 1 | 2511 | 273.3 | 6.44 |
| Q9BY51     | GL009 OS= | 7  | 1 | 1 | 1 | 183  | 21.4  | 9.95 |
| 043598     | 2'-deoxyn | 10 | 1 | 1 | 1 | 174  | 19.1  | 5.05 |
| 060844     | Zymogen g | 5  | 1 | 1 | 1 | 167  | 18.1  | 9.36 |

|           |           |    |   |   |   |      |       |       |
|-----------|-----------|----|---|---|---|------|-------|-------|
| AOA024R89 | Actin-rel | 8  | 1 | 1 | 1 | 153  | 16.9  | 6.6   |
| C9JQB3    | Ras-relat | 6  | 1 | 1 | 1 | 171  | 19.2  | 5     |
| Q8IUG5    | Unconvent | 0  | 1 | 1 | 1 | 2567 | 285   | 6.86  |
| P05204    | Non-histc | 9  | 1 | 1 | 1 | 90   | 9.4   | 9.99  |
| AOA5C2FU5 | IGL c94_l | 25 | 2 | 2 | 1 | 107  | 11.6  | 8.47  |
| B7Z4E8    | Carbohydr | 2  | 1 | 1 | 1 | 404  | 47.8  | 8.81  |
| P36405    | ADP-ribos | 6  | 1 | 1 | 1 | 182  | 20.4  | 7.24  |
| AOA5C2GTL | IG c83_li | 8  | 1 | 1 | 1 | 110  | 11.4  | 5.19  |
| Q9BWD1    | Acetyl-Co | 9  | 2 | 2 | 2 | 397  | 41.3  | 6.92  |
| P33947    | ER lumen  | 4  | 1 | 1 | 1 | 212  | 24.4  | 8.72  |
| Q9UHY7    | Enolase-p | 5  | 1 | 1 | 1 | 261  | 28.9  | 4.78  |
| P40763    | Signal tr | 2  | 1 | 1 | 1 | 770  | 88    | 6.3   |
| AOA024R74 | NADH dehy | 9  | 1 | 1 | 1 | 116  | 13.5  | 5.99  |
| Q8IZP7    | Heparan-s | 3  | 2 | 2 | 2 | 471  | 54.8  | 6.83  |
| K4DIA7    | Tetraspan | 4  | 1 | 1 | 1 | 230  | 25.6  | 7.24  |
| O94919    | Endonucle | 2  | 1 | 1 | 1 | 500  | 55    | 5.71  |
| Q12906    | Interleuk | 1  | 1 | 1 | 1 | 894  | 95.3  | 8.76  |
| AOA0U1RQV | Rho-assoc | 1  | 1 | 1 | 1 | 1137 | 133   | 5.35  |
| B2RDE8    | cDNA, FLJ | 3  | 1 | 1 | 1 | 240  | 26.8  | 4.67  |
| Q59FP8    | Neogenin  | 1  | 1 | 1 | 1 | 1130 | 123.9 | 7.03  |
| AOA5C2G8E | IGL c290_ | 15 | 1 | 1 | 1 | 110  | 11.6  | 4.96  |
| B4DNW4    | cDNA FLJ5 | 3  | 1 | 1 | 1 | 254  | 26.9  | 7.02  |
| AOA5C2GIM | IG c23_li | 10 | 1 | 1 | 1 | 111  | 11.9  | 6     |
| AOA5C2GDS | IGH c121_ | 7  | 1 | 1 | 1 | 122  | 13.3  | 8.84  |
| B4DEX8    | S-adenosy | 4  | 1 | 1 | 1 | 362  | 39.7  | 6.04  |
| HOYGR4    | Oligoribo | 4  | 1 | 1 | 1 | 192  | 22.1  | 8.24  |
| Q14165    | Malectin  | 4  | 1 | 1 | 1 | 292  | 32.2  | 5.41  |
| C9J177    | Protein p | 4  | 1 | 1 | 1 | 289  | 33.7  | 5.22  |
| AOA5C2GBE | IGH + IGL | 15 | 2 | 2 | 1 | 110  | 11.4  | 8.48  |
| AOAVT1    | Ubiquitin | 1  | 1 | 1 | 1 | 1052 | 117.9 | 6.14  |
| AOA384N6H | Epididymi | 2  | 1 | 1 | 1 | 371  | 42.7  | 6.86  |
| Q00169    | Phosphati | 4  | 1 | 1 | 1 | 270  | 31.8  | 6.55  |
| AOA5C2GNH | IG c413_h | 7  | 1 | 1 | 1 | 122  | 13.5  | 9.13  |
| P46109    | Crk-like  | 5  | 1 | 1 | 1 | 303  | 33.8  | 6.74  |
| O43286    | Beta-1,4- | 2  | 1 | 1 | 1 | 388  | 45.1  | 8.15  |
| G3V180    | Dipeptidy | 3  | 2 | 2 | 2 | 757  | 84.3  | 5.03  |
| B7Z9Q5    | cDNA, FLJ | 4  | 1 | 1 | 1 | 252  | 28.2  | 8.32  |
| AOA024ROL | Epididymi | 4  | 1 | 1 | 1 | 231  | 25.7  | 6.84  |
| Q9NP58    | ATP-bindi | 2  | 1 | 1 | 1 | 842  | 93.8  | 8.48  |
| AOA1C7CYZ | Mitogen-a | 3  | 1 | 1 | 1 | 276  | 30.9  | 7.18  |
| P62269    | 40S ribos | 5  | 1 | 1 | 1 | 152  | 17.7  | 10.99 |
| O95881    | Thioredox | 5  | 1 | 1 | 1 | 172  | 19.2  | 5.4   |
| Q9HB71    | Calcyclin | 7  | 2 | 2 | 2 | 228  | 26.2  | 8.25  |
| Q549M8    | CLE7 OS=H | 4  | 1 | 1 | 1 | 244  | 28.1  | 6.65  |
| AOA5C2FVE | IGL c40_l | 17 | 1 | 1 | 1 | 109  | 11.9  | 8.5   |
| O15263    | Beta-defe | 17 | 1 | 1 | 1 | 64   | 7     | 9.22  |
| K7EP45    | Vacuolar  | 14 | 1 | 1 | 1 | 99   | 11.6  | 9.2   |
| Q9UFX5    | Uncharact | 7  | 1 | 1 | 1 | 165  | 17.1  | 8.35  |
| Q7Z4X0    | M025-like | 3  | 1 | 1 | 1 | 341  | 39.7  | 7.47  |
| O60763    | General v | 2  | 1 | 1 | 1 | 962  | 107.8 | 4.91  |
| Q597H1    | Transform | 4  | 1 | 1 | 1 | 394  | 42.8  | 5.82  |

|               |           |    |   |   |   |      |       |       |
|---------------|-----------|----|---|---|---|------|-------|-------|
| Q59G24        | Activated | 10 | 1 | 1 | 1 | 134  | 15.1  | 9.38  |
| P62310        | U6 snRNA- | 8  | 1 | 1 | 1 | 102  | 11.8  | 4.7   |
| P17980        | 26S prote | 3  | 1 | 1 | 1 | 439  | 49.2  | 5.24  |
| AOA5C2GQFIG   | c860_h    | 7  | 1 | 1 | 1 | 128  | 13.9  | 8.73  |
| B4DQK8        | cDNA FLJ5 | 4  | 1 | 1 | 1 | 359  | 36.7  | 11.37 |
| A8K147        | Multifunc | 8  | 1 | 1 | 1 | 154  | 17.3  | 7.02  |
| AOA5C2GM3IG   | c345_1    | 15 | 2 | 2 | 1 | 110  | 11.4  | 7.94  |
| AOA5C2GJWIG   | c1105_    | 8  | 1 | 1 | 1 | 110  | 11.5  | 5.87  |
| Q92734        | Protein T | 2  | 1 | 1 | 1 | 400  | 43.4  | 5.1   |
| B7Z9M1        | cDNA, FLJ | 2  | 1 | 2 | 1 | 452  | 47.7  | 5.66  |
| Q5IWS5        | Intelecti | 3  | 1 | 1 | 1 | 313  | 35    | 5.82  |
| AOA5C2G5VIGH  | c356_     | 16 | 1 | 1 | 1 | 119  | 12.8  | 5.39  |
| AOA087WX3     | Epidermal | 3  | 1 | 1 | 1 | 232  | 25.4  | 8.44  |
| P11586        | C-1-tetra | 1  | 1 | 1 | 1 | 935  | 101.5 | 7.3   |
| Q9BXJ1        | Complemen | 3  | 1 | 1 | 1 | 281  | 31.7  | 6.9   |
| AOA384NL2     | Proteasom | 3  | 1 | 1 | 1 | 205  | 22.9  | 6.55  |
| 000487        | 26S prote | 2  | 1 | 1 | 1 | 310  | 34.6  | 6.52  |
| Q9NSN1        | Uncharact | 2  | 2 | 2 | 2 | 952  | 110.3 | 7.78  |
| Q8NFW8        | N-acylneu | 2  | 1 | 1 | 1 | 434  | 48.3  | 7.93  |
| K7EL62        | Guanine n | 5  | 1 | 1 | 1 | 236  | 27.4  | 5.35  |
| Q53F35        | Acidic (L | 8  | 2 | 2 | 2 | 250  | 28.7  | 4.06  |
| Q5JRP2        | Disintegr | 10 | 2 | 2 | 2 | 278  | 31.1  | 9.11  |
| Q5NKV8        | Intercell | 2  | 1 | 1 | 1 | 532  | 57.8  | 7.68  |
| AOA5C2GD8IGH  | + IGL     | 12 | 1 | 1 | 1 | 111  | 12    | 5.96  |
| AOA024R8I     | Ubiquitin | 4  | 1 | 1 | 1 | 404  | 45.2  | 4.94  |
| B2C6G4        | Fatty aci | 1  | 1 | 1 | 1 | 532  | 58.3  | 9.07  |
| AOA384ME8S    | -methyl-  | 4  | 1 | 1 | 1 | 283  | 31.2  | 7.18  |
| B4DSX2        | cDNA FLJ6 | 2  | 1 | 1 | 1 | 347  | 36.6  | 6.29  |
| AOA5C2FV2IGL  | c454_     | 10 | 1 | 1 | 1 | 108  | 11.5  | 5.4   |
| Q92542        | Nicastrin | 2  | 1 | 1 | 1 | 709  | 78.4  | 5.99  |
| AOA1B0GVSA    | Alpha-cen | 5  | 1 | 1 | 1 | 221  | 24.9  | 6.21  |
| AOA5C2GPAIG   | c650_h    | 7  | 1 | 1 | 1 | 121  | 13.3  | 7.96  |
| E9PC52        | Histone-b | 2  | 1 | 1 | 1 | 416  | 46.9  | 5.07  |
| Q9Y625        | Glypican- | 2  | 1 | 1 | 1 | 555  | 62.7  | 5.41  |
| I3L4V1        | RNA N6-ad | 5  | 1 | 1 | 1 | 148  | 17.1  | 7.4   |
| Q99460        | 26S prote | 1  | 1 | 1 | 1 | 953  | 105.8 | 5.39  |
| AOA125U0VGCT  | -A2 he    | 9  | 1 | 1 | 1 | 126  | 13.8  | 5.45  |
| AOA5C2GJRIGH  | + IGL     | 6  | 1 | 1 | 1 | 112  | 11.7  | 7.97  |
| AOA4P8J5IIgG2 | _IGHV     | 8  | 1 | 1 | 1 | 130  | 14.1  | 8.51  |
| P11226        | Mannose-b | 13 | 2 | 2 | 2 | 248  | 26.1  | 5.49  |
| AOA140VJZ     | Ubiquitin | 1  | 1 | 1 | 1 | 858  | 95.7  | 5.03  |
| AOA024R1U     | Insulin-l | 3  | 1 | 1 | 1 | 258  | 27.9  | 7.15  |
| Q6P4A8        | Phospholi | 1  | 1 | 1 | 1 | 553  | 63.2  | 9.06  |
| Q19UL8        | Coagulati | 20 | 1 | 1 | 1 | 54   | 6.4   | 5.1   |
| B1B0D4        | ADAMTS-li | 1  | 2 | 2 | 2 | 1060 | 116.2 | 6.76  |
| Q2TNB3        | Cell migr | 3  | 1 | 1 | 1 | 239  | 27.3  | 5.58  |
| E9PIE3        | Caveolae- | 3  | 1 | 1 | 1 | 293  | 31.1  | 6.81  |
| BOQY90        | Eukaryoti | 3  | 1 | 1 | 1 | 466  | 55.1  | 8.95  |
| B4DJ06        | cDNA FLJ5 | 1  | 1 | 1 | 1 | 629  | 67.9  | 4.91  |
| AOA5C2FVF     | IGL c584_ | 15 | 1 | 1 | 1 | 107  | 11.7  | 7.97  |
| Q5D079        | A4GALT pr | 2  | 1 | 1 | 1 | 353  | 40.4  | 8.95  |



|                    |            |    |   |   |   |      |       |      |
|--------------------|------------|----|---|---|---|------|-------|------|
| B5MDC5             | cDNA FLJ5  | 4  | 1 | 1 | 1 | 255  | 29    | 4.94 |
| Q8IZH2             | 5'-3' exo  | 0  | 1 | 1 | 1 | 1706 | 194   | 7.21 |
| Q12792             | Twinfilin  | 2  | 1 | 1 | 1 | 350  | 40.3  | 6.96 |
| B1AJY6             | 26S prote  | 6  | 1 | 1 | 1 | 110  | 11.9  | 5.25 |
| Q8NDZ4             | Divergent  | 2  | 1 | 1 | 1 | 430  | 49.5  | 8.53 |
| AOA5C2G2UIGL c3472 |            | 15 | 1 | 1 | 1 | 110  | 11.6  | 7.97 |
| B4DVS2             | cDNA FLJ5  | 1  | 1 | 1 | 1 | 800  | 88.8  | 4.97 |
| B4DWS6             | cDNA FLJ6  | 4  | 1 | 1 | 1 | 304  | 33.5  | 9.39 |
| I3L4J1             | Uncharact  | 2  | 1 | 1 | 1 | 428  | 48    | 7.53 |
| AOA024RBCKit ligan |            | 3  | 1 | 1 | 1 | 273  | 30.9  | 6.14 |
| P53794             | Sodium/my  | 1  | 1 | 1 | 1 | 718  | 79.6  | 7.27 |
| Q9UDT6             | CAP-Gly d  | 1  | 1 | 1 | 1 | 1046 | 115.8 | 6.73 |
| B2RDT9             | cDNA, FLJ  | 2  | 1 | 1 | 1 | 348  | 39.4  | 5.11 |
| Q8WWX9             | Selenopro  | 10 | 1 | 1 | 1 | 145  | 16.2  | 5.54 |
| A4D1U3             | Single-st  | 10 | 1 | 1 | 1 | 148  | 17.2  | 9.6  |
| AOA5C2GGLIG c1162_ |            | 16 | 1 | 1 | 1 | 119  | 13.1  | 8.46 |
| B4DM33             | cDNA FLJ5  | 3  | 1 | 1 | 1 | 238  | 26.6  | 5.29 |
| AOA5C2GNSIG c400_h |            | 24 | 3 | 3 | 1 | 120  | 13.1  | 8.44 |
| AOA5C2G5VIGH c329_ |            | 7  | 1 | 1 | 1 | 122  | 13.1  | 8.88 |
| 000232             | 26S prote  | 3  | 1 | 1 | 1 | 456  | 52.9  | 7.65 |
| B4DS32             | cDNA FLJ5  | 1  | 1 | 1 | 1 | 569  | 64.3  | 5.69 |
| Q14696             | LRP chape  | 13 | 2 | 2 | 2 | 234  | 26.1  | 7.78 |
| B7Z7P8             | Eukaryoti  | 4  | 2 | 2 | 2 | 423  | 47.4  | 5.57 |
| R4QU15             | MHC class  | 7  | 1 | 1 | 1 | 181  | 20.9  | 6.4  |
| B7Z390             | cDNA FLJ5  | 1  | 1 | 1 | 1 | 809  | 87.3  | 6.42 |
| AOA087X0IMyomegali |            | 9  | 1 | 1 | 1 | 66   | 8.2   | 9.04 |
| P29034             | Protein S  | 19 | 2 | 2 | 2 | 98   | 11.1  | 4.78 |
| Q02742             | Beta-1, 3- | 2  | 1 | 1 | 1 | 428  | 49.8  | 8.41 |
| AOA140T9VMegakaryo |            | 4  | 1 | 1 | 1 | 217  | 23.5  | 8.5  |
| B2RE88             | cDNA, FLJ  | 2  | 1 | 1 | 1 | 361  | 39.9  | 9.36 |
| D6RA82             | Annexin C  | 3  | 1 | 1 | 1 | 284  | 32.1  | 5.94 |
| Q75MU2             | Uncharact  | 8  | 1 | 1 | 1 | 156  | 17.1  | 5.31 |
| HOYB70             | Putative   | 4  | 1 | 1 | 1 | 186  | 20.7  | 5.36 |
| AOA5C2GERIGH c531_ |            | 10 | 1 | 1 | 1 | 121  | 13.5  | 7.97 |
| B7Z7F6             | cDNA FLJ5  | 6  | 1 | 1 | 1 | 141  | 15.4  | 9.66 |
| P63220             | 40S ribos  | 8  | 1 | 1 | 1 | 83   | 9.1   | 8.5  |
| AOA5C2GMFIG c23_he |            | 6  | 1 | 1 | 1 | 127  | 14.1  | 4.94 |
| AOA5C2GL5IG c783_1 |            | 15 | 1 | 1 | 1 | 107  | 11.7  | 5.78 |
| Q6LBY7             | Telo-prop  | 36 | 1 | 1 | 1 | 25   | 2.2   | 6.18 |
| Q499H0             | G protein  | 2  | 1 | 1 | 1 | 1003 | 110   | 7.34 |
| J3QL71             | Secernin-  | 4  | 1 | 1 | 1 | 433  | 47.5  | 5.68 |
| C9JFR7             | Cytochrom  | 8  | 1 | 1 | 1 | 101  | 11.3  | 9.66 |
| Q9Y6M5             | Zinc tran  | 2  | 1 | 1 | 1 | 507  | 55.3  | 6.48 |
| AOA5C2H19IG c1678_ |            | 7  | 1 | 1 | 1 | 107  | 11.7  | 9.5  |
| AOA5C2GB6IGH + IGL |            | 12 | 1 | 1 | 1 | 112  | 12.2  | 6.51 |
| AOA5C2FU5IGL c508_ |            | 15 | 2 | 2 | 1 | 110  | 11.6  | 4.96 |
| F2Z2K0             | NSFL1 cof  | 3  | 1 | 1 | 1 | 274  | 30.2  | 5.1  |
| F6IQ87             | Urea tran  | 2  | 1 | 1 | 1 | 389  | 42.5  | 7.15 |
| B7Z9Z3             | cDNA, FLJ  | 1  | 1 | 1 | 1 | 826  | 92.7  | 9.39 |
| 000743             | Serine/th  | 4  | 1 | 1 | 1 | 305  | 35.1  | 5.69 |
| A8K2P3             | cDNA FLJ7  | 1  | 1 | 1 | 1 | 990  | 110.9 | 8.06 |

|                     |    |   |   |   |      |       |       |
|---------------------|----|---|---|---|------|-------|-------|
| AOA5C2G9JIGL c536_  | 12 | 1 | 1 | 1 | 110  | 11.6  | 8.47  |
| AOA5F9ZH7Adenosine  | 9  | 2 | 2 | 2 | 229  | 25.9  | 6.99  |
| Q15847 Adipogene    | 9  | 1 | 1 | 1 | 76   | 7.9   | 5.31  |
| O75367 Core hist    | 5  | 2 | 2 | 2 | 372  | 39.6  | 9.79  |
| Q8NBY1 Serine/th    | 5  | 2 | 2 | 2 | 392  | 43.8  | 5.41  |
| AOA5C2GU2IG c7_he   | 7  | 1 | 1 | 1 | 118  | 13.2  | 8.88  |
| G3V583 Protein F    | 11 | 1 | 1 | 1 | 140  | 16.3  | 4.7   |
| AOA024RBK60S ribos  | 3  | 1 | 1 | 1 | 288  | 32.7  | 10.58 |
| B4DXF3 Bleomycin    | 3  | 1 | 1 | 1 | 368  | 42.4  | 6.25  |
| AOA1W2PRFLysosome   | 3  | 1 | 1 | 1 | 320  | 36.3  | 5.01  |
| C9J3V1 Zinc fing    | 32 | 1 | 1 | 1 | 50   | 5.6   | 4.53  |
| O76003 Glutaredo    | 7  | 2 | 2 | 2 | 335  | 37.4  | 5.39  |
| P14735 Insulin-d    | 2  | 2 | 2 | 2 | 1019 | 117.9 | 6.61  |
| AOA5C2GD5IGH + IGL  | 15 | 1 | 1 | 1 | 110  | 11.5  | 6.76  |
| O43633 Charged m    | 3  | 1 | 1 | 1 | 222  | 25.1  | 5.97  |
| AOA0A0MSCSlit homc  | 1  | 1 | 1 | 1 | 1393 | 153.7 | 7.39  |
| B3KY04 cDNA FLJ4    | 3  | 1 | 1 | 1 | 325  | 35.7  | 5.64  |
| E9PAL5 Collagen     | 0  | 1 | 1 | 1 | 2611 | 289.3 | 6.95  |
| AOA087X26TAR DNA-b  | 4  | 1 | 1 | 1 | 301  | 34.2  | 6.44  |
| Q00532 Cyclin-de    | 2  | 1 | 1 | 1 | 358  | 41.8  | 8.85  |
| B3KMK7 cDNA FLJ1    | 2  | 1 | 1 | 1 | 528  | 59.6  | 6.23  |
| Q8NGA1 Olfactory    | 2  | 1 | 1 | 1 | 313  | 34.8  | 8.91  |
| AOA5C2GD5IGH + IGL  | 15 | 1 | 1 | 1 | 107  | 11.7  | 5.31  |
| U3KPS2 Myeloblas    | 4  | 1 | 1 | 1 | 215  | 23.6  | 8.16  |
| I3L426 Coronin (    | 6  | 1 | 1 | 1 | 206  | 22    | 8.81  |
| Q3B7A7 Trifuncti    | 1  | 1 | 1 | 1 | 1010 | 107.7 | 6.77  |
| Q9H444 Charged m    | 4  | 1 | 1 | 1 | 224  | 24.9  | 4.82  |
| B3KRK4 cDNA FLJ3    | 3  | 1 | 1 | 1 | 234  | 26.2  | 4.55  |
| O14604 Thymosin     | 16 | 1 | 1 | 1 | 44   | 5     | 5.36  |
| Q7RTR0 NACHT, LR    | 1  | 1 | 1 | 1 | 991  | 113.2 | 6.51  |
| B1AKZ4 Phosphopr    | 9  | 1 | 1 | 1 | 130  | 15    | 5.02  |
| AOA5C2GA1IGH + IGL  | 7  | 1 | 1 | 1 | 119  | 12.9  | 8.29  |
| B7Z1G4 cDNA FLJ6    | 3  | 1 | 1 | 1 | 357  | 39    | 6.07  |
| G3V560 NADH dehy    | 9  | 1 | 1 | 1 | 93   | 10.5  | 9.88  |
| H3BT06 Phosphoma    | 9  | 1 | 1 | 1 | 90   | 10.4  | 9.44  |
| C9JYY9 ADP-sugar    | 9  | 1 | 1 | 1 | 97   | 11.2  | 7.97  |
| Q99592 Zinc fing    | 2  | 1 | 1 | 1 | 522  | 58.3  | 5.69  |
| AOA0A0MSX Isoleucyl | 1  | 1 | 1 | 1 | 1242 | 142.2 | 6.09  |
| Q9Y5C1 Angiopoie    | 2  | 1 | 1 | 1 | 460  | 53.6  | 6.7   |
| Q96QB2 Sodium-in    | 1  | 1 | 1 | 1 | 507  | 55.1  | 7.91  |
| O00245 EXTL2 (Fr    | 5  | 1 | 1 | 1 | 129  | 14.7  | 8.43  |
| AOA5C2GM4IG c288_h  | 11 | 2 | 2 | 1 | 124  | 13.5  | 9.36  |
| AOA0S2Z4RTyrosine-  | 2  | 1 | 1 | 1 | 528  | 59.1  | 7.05  |
| Q14D04 Ventricul    | 1  | 1 | 1 | 1 | 833  | 94.7  | 6.71  |
| A2TDB8 Cysteine     | 4  | 1 | 1 | 1 | 194  | 21    | 8.54  |
| AOA140TA8MICOS com  | 6  | 1 | 1 | 1 | 110  | 12    | 7.96  |
| P15529 Membrane     | 2  | 1 | 1 | 1 | 392  | 43.7  | 6.74  |
| AOA5C2GUEIG c532_1  | 7  | 1 | 1 | 1 | 107  | 11.7  | 7.96  |
| AOA1BOGXEHaloacid   | 5  | 1 | 1 | 1 | 131  | 14.6  | 6.8   |
| B3KTQ1 cDNA FLJ3    | 3  | 1 | 1 | 1 | 350  | 40.8  | 8.03  |
| Q9UBD9 Cardiotro    | 4  | 1 | 1 | 1 | 225  | 25.2  | 8.46  |

|                     |           |    |   |   |   |     |       |       |
|---------------------|-----------|----|---|---|---|-----|-------|-------|
| B5MCT8              | 40S ribos | 5  | 1 | 1 | 1 | 139 | 16.6  | 11.06 |
| E9PHR9              | Phospholi | 5  | 1 | 1 | 1 | 239 | 26.2  | 6.09  |
| Q53EY4              | RAB31, me | 6  | 1 | 1 | 1 | 195 | 21.7  | 7.06  |
| AOA5C2GBCIGH + IGL  |           | 9  | 1 | 1 | 1 | 118 | 12.8  | 7.97  |
| J3QQQ9              | KOW domai | 8  | 2 | 2 | 2 | 107 | 12.7  | 10.78 |
| AOA5C2G67IGH c82_h  |           | 6  | 1 | 1 | 1 | 122 | 13.2  | 7.46  |
| Q6VAB6              | Kinase su | 1  | 1 | 1 | 1 | 950 | 107.6 | 8.69  |
| Q9UHQ9              | NADH-cytc | 6  | 2 | 2 | 2 | 305 | 34.1  | 9.38  |
| J3KNF4              | Copper ch | 3  | 1 | 1 | 1 | 255 | 27.1  | 5.9   |
| O95302              | Peptidyl- | 3  | 2 | 2 | 2 | 570 | 63    | 5.08  |
| G3V158              | 2-deoxyri | 5  | 1 | 1 | 1 | 230 | 25.1  | 8.16  |
| AOA5C2GDFIGH + IGL  |           | 8  | 1 | 1 | 1 | 130 | 14.3  | 8.69  |
| V9HW92              | Epididymi | 4  | 1 | 1 | 1 | 329 | 36    | 7.02  |
| Q9BQQ5              | Ribosomal | 9  | 1 | 1 | 1 | 106 | 12    | 11.46 |
| B7ZLF2              | Uncharact | 7  | 1 | 1 | 1 | 96  | 10.1  | 9.69  |
| AOA5C2G45IGL c2715  |           | 7  | 1 | 1 | 1 | 107 | 11.8  | 8.62  |
| AOA5C2G6IIIGL c2033 |           | 8  | 1 | 1 | 1 | 109 | 12    | 7.99  |
| AOA0G2JS8AP-2 comp  |           | 2  | 2 | 2 | 1 | 917 | 101.6 | 6.86  |
| AOA087WZVD-aminoac  |           | 4  | 1 | 1 | 1 | 223 | 25.3  | 9.04  |
| AOA5C2GA7IGH c163_  |           | 15 | 1 | 1 | 1 | 123 | 13.4  | 5.12  |
| Q6GMV3              | Putative  | 6  | 1 | 1 | 1 | 140 | 15.8  | 9.1   |
| B4DVQ5              | Eukaryoti | 1  | 1 | 1 | 1 | 898 | 103.6 | 5.53  |
| AOA384MQXEpididymi  |           | 5  | 1 | 1 | 1 | 284 | 30.4  | 6.54  |
| AOA5C2GBXIGH + IGL  |           | 16 | 2 | 2 | 1 | 127 | 13.9  | 8.84  |
| AOA5C2GXRIG c1542_  |           | 8  | 1 | 1 | 1 | 111 | 11.9  | 8.53  |
| P50238              | Cysteine- | 9  | 1 | 1 | 1 | 77  | 8.5   | 8.75  |
| Q6IB11              | PGRMC1 pr | 10 | 2 | 2 | 1 | 195 | 21.7  | 4.7   |
| Q7Z4Z1              | Coatomer  | 3  | 1 | 1 | 1 | 307 | 34.4  | 5.2   |
| AOA5C2FYFIGL c1350  |           | 7  | 1 | 1 | 1 | 108 | 11.9  | 8.48  |
| E9PFG7              | 2-oxoglut | 1  | 1 | 1 | 1 | 873 | 99    | 7.46  |
| AOA140T8ZLymphocyt  |           | 2  | 1 | 1 | 1 | 382 | 40.9  | 7.81  |
| AOA5C2GNGIG c718_h  |           | 14 | 2 | 2 | 1 | 125 | 13.4  | 7.96  |
| AOA5C2G33IGL c3010  |           | 8  | 1 | 1 | 1 | 108 | 11.6  | 7.97  |
| E7EUT2              | Piezo-typ | 3  | 1 | 1 | 1 | 373 | 41.3  | 9.48  |
| K7ERC8              | 3-ketodih | 4  | 1 | 1 | 1 | 298 | 32.7  | 7.96  |
| K7EM16              | Vasodilat | 5  | 1 | 1 | 1 | 183 | 20.1  | 7.94  |
| Q05655              | Protein k | 1  | 1 | 1 | 1 | 676 | 77.5  | 7.75  |
| AOA5C2G7JIGL c418_  |           | 15 | 2 | 2 | 1 | 110 | 11.4  | 7.96  |
| Q86X55              | Histone-a | 1  | 1 | 1 | 1 | 608 | 65.8  | 6.73  |
| Q6N039              | Transmemb | 2  | 1 | 1 | 1 | 329 | 36.5  | 5.25  |
| B4DNN3              | cDNA FLJ5 | 1  | 1 | 1 | 1 | 725 | 82.2  | 7.78  |
| I3L4Q9              | Vesicle-f | 7  | 1 | 1 | 1 | 81  | 8.9   | 9.06  |
| AON5T0              | V-gamma-1 | 12 | 2 | 2 | 1 | 161 | 17.6  | 10.14 |
| Q8IZ83              | Aldehyde  | 1  | 1 | 1 | 1 | 802 | 85.1  | 6.79  |
| B4E3L5              | cDNA FLJ5 | 2  | 1 | 1 | 1 | 740 | 82.3  | 6.54  |
| D6RCE4              | Protocadh | 2  | 1 | 1 | 1 | 488 | 53.9  | 7.36  |
| Q8NHP8              | Putative  | 1  | 1 | 1 | 1 | 589 | 65.4  | 6.8   |
| B5BU77              | Protein k | 1  | 1 | 1 | 1 | 683 | 77.8  | 7.77  |
| Q9NQH7              | Xaa-Pro a | 1  | 1 | 1 | 1 | 507 | 57    | 6.83  |
| O75493              | Carbonic  | 3  | 1 | 1 | 1 | 328 | 36.2  | 9.74  |
| A8MUD9              | 60S ribos | 8  | 2 | 2 | 2 | 208 | 24.4  | 10.67 |

|                 |            |    |   |   |   |      |       |       |
|-----------------|------------|----|---|---|---|------|-------|-------|
| O15511          | Actin-rel  | 4  | 1 | 1 | 1 | 151  | 16.3  | 5.67  |
| P28074          | Proteasom  | 8  | 2 | 2 | 2 | 263  | 28.5  | 6.92  |
| A8K122          | KIAA1946,  | 1  | 1 | 1 | 1 | 827  | 92.3  | 8.65  |
| AOA5C2GVXIG     | c1919_     | 15 | 1 | 1 | 1 | 125  | 13.5  | 5.41  |
| AOA5C2G3EIGL    | c3642      | 14 | 1 | 1 | 1 | 111  | 11.6  | 4.94  |
| AOA024RD4RAB23, | me         | 8  | 1 | 1 | 1 | 237  | 26.6  | 6.6   |
| B4E3S9          | cDNA FLJ5  | 2  | 1 | 1 | 1 | 549  | 61.5  | 9.16  |
| O95180          | Voltage-d  | 1  | 1 | 1 | 1 | 2353 | 259   | 7.37  |
| HOYNW7          | Guanine n  | 12 | 1 | 1 | 1 | 100  | 11.4  | 8.02  |
| Q9Y3E7          | Charged m  | 3  | 1 | 1 | 1 | 222  | 25.1  | 5.12  |
| Q9Y3B5          | CGI-111 p  | 7  | 1 | 1 | 1 | 199  | 22.1  | 7.43  |
| A9Z1Z3          | Fer-1-lik  | 1  | 1 | 1 | 1 | 1794 | 200.9 | 6.24  |
| AOA5C2FURIGL    | c758_      | 14 | 1 | 1 | 1 | 112  | 11.8  | 7.96  |
| H7C377          | COMM doma  | 53 | 1 | 1 | 1 | 32   | 3.6   | 4.17  |
| Q9UJU6          | Drebrin-1  | 3  | 1 | 1 | 1 | 430  | 48.2  | 5.05  |
| Q9H488          | GDP-fucos  | 3  | 1 | 1 | 1 | 388  | 43.9  | 8.53  |
| H3BUU9          | Cadherin-  | 2  | 1 | 1 | 1 | 670  | 73.7  | 4.7   |
| P05089          | Arginase-  | 6  | 1 | 1 | 1 | 322  | 34.7  | 7.21  |
| AOA5C2GFCIGH    | + IGL      | 9  | 1 | 1 | 1 | 123  | 13.7  | 6.77  |
| Q75MQ1          | Uncharact  | 2  | 1 | 1 | 1 | 513  | 59.1  | 7.47  |
| AOA1W2PNW       | Calcium-a  | 1  | 1 | 1 | 1 | 1230 | 137   | 6.92  |
| Q8TEI3          | FLJ00214   | 4  | 1 | 1 | 1 | 322  | 34.6  | 5.08  |
| Q14191          | Werner sy  | 1  | 1 | 1 | 1 | 1432 | 162.4 | 6.34  |
| AOA1BOGTFRho    | guani      | 4  | 1 | 1 | 1 | 263  | 31.5  | 6.54  |
| P17813          | Endoglin   | 2  | 1 | 1 | 1 | 658  | 70.5  | 6.61  |
| P39023          | 60S ribos  | 2  | 1 | 1 | 1 | 403  | 46.1  | 10.18 |
| AOA024R8F       | Glutamate  | 1  | 1 | 1 | 1 | 1277 | 138.6 | 9.32  |
| Q9UKA4          | A-kinase   | 0  | 1 | 1 | 1 | 1901 | 210.4 | 5.39  |
| G3V415          | Guanine n  | 11 | 1 | 1 | 1 | 61   | 6.9   | 9.32  |
| E9PCY7          | Heterogen  | 4  | 1 | 1 | 1 | 429  | 47.1  | 6.34  |
| Q02338          | D-beta-hy  | 5  | 1 | 1 | 1 | 343  | 38.1  | 8.95  |
| Q13445          | Transmemb  | 4  | 1 | 1 | 1 | 227  | 25.2  | 4.48  |
| Q13253          | Noggin OS  | 5  | 1 | 1 | 1 | 232  | 25.8  | 8.85  |
| K7EKP8          | Cytosolic  | 3  | 1 | 1 | 1 | 279  | 30.8  | 6.99  |
| Q13641          | Trophobla  | 2  | 1 | 1 | 1 | 420  | 46    | 6.83  |
| P50453          | Serpina B9 | 3  | 1 | 1 | 1 | 376  | 42.4  | 5.86  |
| P21741          | Midkine C  | 11 | 1 | 1 | 1 | 143  | 15.6  | 9.79  |
| B2R932          | cDNA, FLJ  | 5  | 1 | 1 | 1 | 185  | 18.9  | 4.82  |
| AOA384ME1       | Elongatio  | 3  | 1 | 1 | 1 | 455  | 49.8  | 7.61  |
| A4D1T9          | Probable   | 7  | 1 | 1 | 1 | 235  | 26.4  | 8.87  |
| Q9UKV8          | Protein a  | 2  | 1 | 1 | 1 | 859  | 97.1  | 9.19  |
| AOA5C2G84IGH    | c587_      | 13 | 1 | 2 | 1 | 121  | 13.3  | 7.91  |
| AOA1POAYUS      | Sidorefle  | 5  | 1 | 1 | 1 | 325  | 36    | 9.09  |
| Q6LETO          | Tetraspan  | 6  | 1 | 1 | 1 | 267  | 29.6  | 5.24  |
| AOA5C2GZJIG     | c136_1     | 7  | 1 | 1 | 1 | 109  | 11.8  | 7.96  |
| AOA140VJZ       | Ubiquitin  | 7  | 1 | 1 | 1 | 230  | 26.2  | 4.92  |
| AOA5C2G1QIGL    | c2834      | 14 | 1 | 1 | 1 | 111  | 11.5  | 5.24  |
| B4DMZ0          | Tyrosine-  | 2  | 1 | 1 | 1 | 371  | 42.1  | 6.39  |
| B3KWE1          | Histidyl-  | 3  | 1 | 1 | 1 | 440  | 49.6  | 5.41  |
| AOA5C2G6TIGH    | c292_      | 6  | 1 | 1 | 1 | 127  | 13.8  | 8.16  |
| G8JL96          | Receptor-  | 2  | 1 | 1 | 1 | 1501 | 168.3 | 6.65  |

|                     |    |   |   |   |     |      |      |
|---------------------|----|---|---|---|-----|------|------|
| AOA5C2FYC IGL c1889 | 8  | 1 | 1 | 1 | 107 | 11.6 | 8.5  |
| AOA087WY3 Integrin  | 2  | 1 | 1 | 1 | 445 | 48.5 | 5.4  |
| K7EL56 ATP-depen    | 9  | 1 | 1 | 1 | 108 | 11.9 | 4.5  |
| Q7Z3L2 Uncharact    | 2  | 1 | 1 | 1 | 849 | 95.2 | 8.47 |
| AOA5C2GCNIGH + IGL  | 10 | 1 | 1 | 1 | 110 | 11.7 | 7.96 |
| Q9Y3C8 Ubiquitin    | 6  | 1 | 1 | 1 | 167 | 19.4 | 7.4  |
| P10644 cAMP-depe    | 3  | 1 | 1 | 1 | 381 | 43   | 5.35 |
| Q8TD06 Anterior     | 6  | 1 | 1 | 1 | 166 | 19.2 | 7.99 |
| HOYN88 40S ribos    | 7  | 1 | 1 | 1 | 136 | 15.9 | 9.91 |
| AOA5C2G7HIGL c3707  | 15 | 1 | 1 | 1 | 107 | 11.5 | 9.2  |
| AOA024R58 Uncharact | 4  | 1 | 1 | 1 | 285 | 33.1 | 9.19 |
| AOA5C2GF8IGH + IGL  | 8  | 1 | 1 | 1 | 120 | 12.9 | 6.62 |
| Q9UFN0 Protein N    | 4  | 1 | 1 | 1 | 247 | 28.4 | 9.16 |
| B7Z5N7 cDNA FLJ5    | 4  | 1 | 1 | 1 | 457 | 51.5 | 6.96 |
| A8K2S1 Phospholi    | 2  | 1 | 1 | 1 | 749 | 85.2 | 5.38 |
| L8EAL0 Alternati    | 35 | 1 | 1 | 1 | 40  | 4.6  | 8.68 |
| B2R823 cDNA, FLJ    | 4  | 1 | 1 | 1 | 252 | 27.9 | 9.73 |
| B2R736 cDNA, FLJ    | 3  | 1 | 1 | 1 | 547 | 59.5 | 5.43 |



|        |    |             |           |           |           |           |           |
|--------|----|-------------|-----------|-----------|-----------|-----------|-----------|
| 684.21 | 61 | 61 High     | High      | High      | High      | High      | High      |
| 674.12 | 18 | 0 High      | High      | High      | High      | High      | High      |
| 667.8  | 16 | 0 High      | High      | High      | High      | High      | High      |
| 664.12 | 14 | 0 High      | High      | High      | High      | High      | High      |
| 659.88 | 13 | 5 High      | High      | High      | High      | High      | High      |
| 658.29 | 26 | 0 High      | High      | High      | High      | High      | High      |
| 628.89 | 33 | 0 High      | High      | High      | High      | High      | High      |
| 606.65 | 16 | 10 High     | High      | High      | High      | High      | High      |
| 599.65 | 12 | 0 High      | High      | High      | High      | High      | High      |
| 588.7  | 37 | 0 High      | High      | High      | High      | High      | High      |
| 574.33 | 95 | 0 High      | High      | High      | High      | High      | High      |
| 566.95 | 7  | 1 High      | High      | High      | High      | High      | High      |
| 549.4  | 62 | 3 High      | High      | High      | High      | High      | High      |
| 541.7  | 61 | 0 Not Found | Not Found |
| 535.49 | 62 | 63 High     | High      | High      | High      | High      | High      |
| 521.17 | 6  | 0 High      | High      | High      | High      | High      | High      |
| 515.44 | 28 | 27 High     | High      | High      | High      | High      | High      |
| 506.04 | 11 | 0 High      | High      | High      | High      | High      | High      |
| 483.66 | 3  | 0 High      | High      | High      | High      | High      | High      |
| 472.62 | 44 | 0 High      | High      | High      | High      | High      | High      |
| 470.07 | 44 | 50 High     | High      | High      | High      | High      | High      |
| 452.97 | 26 | 0 High      | High      | High      | High      | High      | High      |
| 451.37 | 5  | 0 High      | High      | High      | High      | High      | High      |
| 445.97 | 5  | 0 High      | High      | High      | High      | High      | High      |
| 418.9  | 36 | 32 High     | High      | High      | High      | High      | High      |
| 412.98 | 32 | 0 High      | High      | High      | High      | High      | High      |
| 411.54 | 30 | 3 High      | High      | High      | High      | High      | High      |
| 409.04 | 7  | 4 High      | High      | High      | High      | High      | High      |
| 408.33 | 26 | 0 High      | High      | High      | High      | High      | High      |
| 406.98 | 28 | 0 High      | High      | High      | High      | High      | High      |
| 404.88 | 86 | 0 High      | High      | High      | High      | High      | High      |
| 385.81 | 38 | 0 High      | High      | High      | High      | High      | High      |
| 385.8  | 30 | 2 High      | High      | High      | High      | High      | High      |
| 385.4  | 52 | 53 High     | High      | High      | High      | High      | High      |
| 375.1  | 27 | 11 High     | High      | High      | High      | High      | High      |
| 369.1  | 51 | 0 High      | High      | High      | High      | High      | High      |
| 368.7  | 29 | 0 High      | High      | High      | High      | High      | High      |
| 363.22 | 55 | 0 High      | High      | High      | High      | High      | High      |
| 362.7  | 26 | 0 High      | High      | High      | High      | High      | High      |
| 357.38 | 31 | 33 High     | High      | High      | High      | High      | High      |
| 355.61 | 15 | 6 High      | High      | High      | High      | High      | High      |
| 352.61 | 41 | 0 High      | High      | High      | High      | High      | High      |
| 349.83 | 6  | 0 High      | High      | High      | High      | High      | High      |
| 346.1  | 6  | 1 High      | High      | High      | High      | High      | High      |
| 345.01 | 6  | 1 High      | High      | High      | High      | High      | High      |
| 340.55 | 34 | 0 High      | High      | High      | High      | High      | High      |
| 339.97 | 17 | 0 High      | High      | High      | High      | High      | High      |
| 332.33 | 36 | 1 High      | High      | High      | High      | High      | High      |
| 327.88 | 7  | 4 High      | High      | High      | High      | High      | High      |
| 325.89 | 49 | 18 High     | High      | High      | High      | High      | High      |
| 325.32 | 75 | 72 High     | High      | High      | High      | High      | High      |

|        |    |         |      |      |      |      |      |
|--------|----|---------|------|------|------|------|------|
| 323.43 | 5  | 0 High  | High | High | High | High | High |
| 322.8  | 11 | 0 High  | High | High | High | High | High |
| 322.62 | 30 | 0 High  | High | High | High | High | High |
| 318.9  | 73 | 0 High  | High | High | High | High | High |
| 304.21 | 9  | 0 High  | High | High | High | High | High |
| 302.01 | 6  | 0 High  | High | High | High | High | High |
| 300.11 | 25 | 0 High  | High | High | High | High | High |
| 298.3  | 25 | 12 High | High | High | High | High | High |
| 296.72 | 15 | 0 High  | High | High | High | High | High |
| 294.62 | 13 | 0 High  | High | High | High | High | High |
| 294.05 | 49 | 0 High  | High | High | High | High | High |
| 293.84 | 16 | 14 High | High | High | High | High | High |
| 292.23 | 5  | 1 High  | High | High | High | High | High |
| 287.48 | 16 | 8 High  | High | High | High | High | High |
| 275.31 | 17 | 0 High  | High | High | High | High | High |
| 273.67 | 29 | 28 High | High | High | High | High | High |
| 272.88 | 28 | 0 High  | High | High | High | High | High |
| 271.85 | 18 | 8 High  | High | High | High | High | High |
| 271.1  | 30 | 0 High  | High | High | High | High | High |
| 269.48 | 30 | 5 High  | High | High | High | High | High |
| 267.67 | 13 | 0 High  | High | High | High | High | High |
| 245.55 | 21 | 21 High | High | High | High | High | High |
| 244.4  | 24 | 0 High  | High | High | High | High | High |
| 242.55 | 27 | 17 High | High | High | High | High | High |
| 240.5  | 21 | 0 High  | High | High | High | High | High |
| 233.08 | 18 | 0 High  | High | High | High | High | High |
| 232.9  | 32 | 0 High  | High | High | High | High | High |
| 230.53 | 72 | 0 High  | High | High | High | High | High |
| 223.07 | 24 | 0 High  | High | High | High | High | High |
| 223.05 | 15 | 0 High  | High | High | High | High | High |
| 218.79 | 33 | 29 High | High | High | High | High | High |
| 217.62 | 11 | 0 High  | High | High | High | High | High |
| 215.07 | 14 | 0 High  | High | High | High | High | High |
| 213.79 | 18 | 16 High | High | High | High | High | High |
| 204.55 | 15 | 0 High  | High | High | High | High | High |
| 204.26 | 3  | 1 High  | High | High | High | High | High |
| 203.83 | 24 | 0 High  | High | High | High | High | High |
| 203.74 | 24 | 0 High  | High | High | High | High | High |
| 203.7  | 15 | 0 High  | High | High | High | High | High |
| 201.89 | 3  | 0 High  | High | High | High | High | High |
| 197.82 | 29 | 0 High  | High | High | High | High | High |
| 191.85 | 4  | 0 High  | High | High | High | High | High |
| 186.2  | 20 | 0 High  | High | High | High | High | High |
| 185.26 | 30 | 0 High  | High | High | High | High | High |
| 184.14 | 19 | 0 High  | High | High | High | High | High |
| 181.92 | 45 | 3 High  | High | High | High | High | High |
| 181.76 | 17 | 0 High  | High | High | High | High | High |
| 179.82 | 27 | 0 High  | High | High | High | High | High |
| 178.15 | 21 | 0 High  | High | High | High | High | High |
| 175.43 | 15 | 0 High  | High | High | High | High | High |
| 173.92 | 18 | 0 High  | High | High | High | High | High |



|        |    |         |      |      |      |      |      |
|--------|----|---------|------|------|------|------|------|
| 173.5  | 44 | 0 High  | High | High | High | High | High |
| 172.55 | 21 | 0 High  | High | High | High | High | High |
| 170.54 | 30 | 0 High  | High | High | High | High | High |
| 169.82 | 8  | 0 High  | High | High | High | High | High |
| 169.8  | 35 | 12 High | High | High | High | High | High |
| 168.82 | 20 | 0 High  | High | High | High | High | High |
| 168.46 | 25 | 0 High  | High | High | High | High | High |
| 168.3  | 12 | 0 High  | High | High | High | High | High |
| 166.97 | 14 | 0 High  | High | High | High | High | High |
| 166.65 | 20 | 0 High  | High | High | High | High | High |
| 165.45 | 17 | 0 High  | High | High | High | High | High |
| 165.11 | 14 | 0 High  | High | High | High | High | High |
| 165.08 | 21 | 0 High  | High | High | High | High | High |
| 164.8  | 12 | 9 High  | High | High | High | High | High |
| 163.19 | 15 | 1 High  | High | High | High | High | High |
| 162.38 | 24 | 1 High  | High | High | High | High | High |
| 161.84 | 25 | 0 High  | High | High | High | High | High |
| 160.99 | 16 | 0 High  | High | High | High | High | High |
| 158.14 | 10 | 0 High  | High | High | High | High | High |
| 158.12 | 41 | 0 High  | High | High | High | High | High |
| 158.09 | 25 | 23 High | High | High | High | High | High |
| 155.05 | 23 | 1 High  | High | High | High | High | High |
| 154.22 | 16 | 0 High  | High | High | High | High | High |
| 154.13 | 20 | 1 High  | High | High | High | High | High |
| 153.69 | 14 | 0 High  | High | High | High | High | High |
| 152.27 | 16 | 0 High  | High | High | High | High | High |
| 152.2  | 11 | 0 High  | High | High | High | High | High |
| 149.96 | 6  | 1 High  | High | High | High | High | High |
| 148.32 | 42 | 0 High  | High | High | High | High | High |
| 147.77 | 16 | 13 High | High | High | High | High | High |
| 146.79 | 42 | 0 High  | High | High | High | High | High |
| 144.89 | 7  | 0 High  | High | High | High | High | High |
| 144.64 | 17 | 0 High  | High | High | High | High | High |
| 138.58 | 13 | 0 High  | High | High | High | High | High |
| 138.53 | 9  | 0 High  | High | High | High | High | High |
| 138.53 | 22 | 0 High  | High | High | High | High | High |
| 138.42 | 15 | 0 High  | High | High | High | High | High |
| 137.78 | 12 | 0 High  | High | High | High | High | High |
| 137.06 | 19 | 0 High  | High | High | High | High | High |
| 135.48 | 39 | 3 High  | High | High | High | High | High |
| 135.44 | 26 | 3 High  | High | High | High | High | High |
| 134.93 | 10 | 1 High  | High | High | High | High | High |
| 134.92 | 24 | 0 High  | High | High | High | High | High |
| 133.53 | 24 | 21 High | High | High | High | High | High |
| 132.95 | 34 | 1 High  | High | High | High | High | High |
| 132.88 | 24 | 5 High  | High | High | High | High | High |
| 132.54 | 18 | 2 High  | High | High | High | High | High |
| 132.44 | 17 | 0 High  | High | High | High | High | High |
| 132.37 | 7  | 0 High  | High | High | High | High | High |
| 131.14 | 19 | 1 High  | High | High | High | High | High |
| 130.72 | 10 | 1 High  | High | High | High | High | High |

|        |    |         |      |      |      |      |      |
|--------|----|---------|------|------|------|------|------|
| 129.86 | 22 | 0 High  | High | High | High | High | High |
| 129.84 | 18 | 1 High  | High | High | High | High | High |
| 129.67 | 19 | 0 High  | High | High | High | High | High |
| 129.26 | 14 | 0 High  | High | High | High | High | High |
| 124.08 | 7  | 0 High  | High | High | High | High | High |
| 122.96 | 10 | 0 High  | High | High | High | High | High |
| 122.75 | 20 | 0 High  | High | High | High | High | High |
| 121.98 | 26 | 0 High  | High | High | High | High | High |
| 120.5  | 9  | 0 High  | High | High | High | High | High |
| 120.47 | 18 | 0 High  | High | High | High | High | High |
| 120.26 | 22 | 0 High  | High | High | High | High | High |
| 119.75 | 20 | 0 High  | High | High | High | High | High |
| 119.08 | 4  | 0 High  | High | High | High | High | High |
| 118.87 | 9  | 0 High  | High | High | High | High | High |
| 118.27 | 21 | 0 High  | High | High | High | High | High |
| 117.18 | 12 | 0 High  | High | High | High | High | High |
| 116.82 | 20 | 5 High  | High | High | High | High | High |
| 116.6  | 19 | 0 High  | High | High | High | High | High |
| 114.79 | 19 | 0 High  | High | High | High | High | High |
| 114.37 | 18 | 0 High  | High | High | High | High | High |
| 113.04 | 11 | 0 High  | High | High | High | High | High |
| 112.28 | 25 | 1 High  | High | High | High | High | High |
| 111.29 | 22 | 14 High | High | High | High | High | High |
| 109.51 | 27 | 7 High  | High | High | High | High | High |
| 109.08 | 19 | 1 High  | High | High | High | High | High |
| 107.88 | 24 | 10 High | High | High | High | High | High |
| 107.56 | 17 | 10 High | High | High | High | High | High |
| 104.61 | 29 | 9 High  | High | High | High | High | High |
| 104.46 | 8  | 0 High  | High | High | High | High | High |
| 104.24 | 19 | 0 High  | High | High | High | High | High |
| 103    | 17 | 0 High  | High | High | High | High | High |
| 102.43 | 20 | 3 High  | High | High | High | High | High |
| 101.06 | 12 | 0 High  | High | High | High | High | High |
| 101    | 14 | 0 High  | High | High | High | High | High |
| 100.16 | 7  | 2 High  | High | High | High | High | High |
| 99.34  | 38 | 0 High  | High | High | High | High | High |
| 99.07  | 8  | 0 High  | High | High | High | High | High |
| 98.2   | 5  | 0 High  | High | High | High | High | High |
| 98.06  | 10 | 0 High  | High | High | High | High | High |
| 97.86  | 20 | 1 High  | High | High | High | High | High |
| 97.47  | 5  | 0 High  | High | High | High | High | High |
| 97.27  | 23 | 0 High  | High | High | High | High | High |
| 96.59  | 9  | 0 High  | High | High | High | High | High |
| 94.37  | 23 | 0 High  | High | High | High | High | High |
| 93.59  | 20 | 0 High  | High | High | High | High | High |
| 93.17  | 12 | 0 High  | High | High | High | High | High |
| 92.72  | 19 | 0 High  | High | High | High | High | High |
| 92.1   | 21 | 0 High  | High | High | High | High | High |
| 91.45  | 17 | 0 High  | High | High | High | High | High |
| 91     | 22 | 0 High  | High | High | High | High | High |
| 90.59  | 15 | 0 High  | High | High | High | High | High |

|       |    |         |      |      |      |      |      |
|-------|----|---------|------|------|------|------|------|
| 90.59 | 9  | 0 High  | High | High | High | High | High |
| 90.31 | 14 | 0 High  | High | High | High | High | High |
| 90.17 | 5  | 0 High  | High | High | High | High | High |
| 89.95 | 29 | 1 High  | High | High | High | High | High |
| 89.11 | 9  | 0 High  | High | High | High | High | High |
| 88.98 | 9  | 0 High  | High | High | High | High | High |
| 88.76 | 12 | 11 High | High | High | High | High | High |
| 88.35 | 18 | 5 High  | High | High | High | High | High |
| 88.21 | 10 | 0 High  | High | High | High | High | High |
| 88.11 | 16 | 11 High | High | High | High | High | High |
| 87.19 | 14 | 0 High  | High | High | High | High | High |
| 86.85 | 20 | 18 High | High | High | High | High | High |
| 86.26 | 19 | 0 High  | High | High | High | High | High |
| 85.91 | 22 | 0 High  | High | High | High | High | High |
| 85.37 | 12 | 0 High  | High | High | High | High | High |
| 84.1  | 4  | 0 High  | High | High | High | High | High |
| 83.93 | 12 | 0 High  | High | High | High | High | High |
| 83.83 | 17 | 1 High  | High | High | High | High | High |
| 83.55 | 23 | 0 High  | High | High | High | High | High |
| 82.69 | 3  | 0 High  | High | High | High | High | High |
| 82.35 | 19 | 0 High  | High | High | High | High | High |
| 82.26 | 16 | 8 High  | High | High | High | High | High |
| 81.29 | 15 | 0 High  | High | High | High | High | High |
| 81.11 | 4  | 0 High  | High | High | High | High | High |
| 81.06 | 13 | 0 High  | High | High | High | High | High |
| 80.98 | 11 | 0 High  | High | High | High | High | High |
| 80.9  | 16 | 1 High  | High | High | High | High | High |
| 80.42 | 5  | 0 High  | High | High | High | High | High |
| 79.6  | 7  | 0 High  | High | High | High | High | High |
| 79.58 | 9  | 0 High  | High | High | High | High | High |
| 79.4  | 17 | 0 High  | High | High | High | High | High |
| 79.39 | 20 | 0 High  | High | High | High | High | High |
| 79.26 | 15 | 0 High  | High | High | High | High | High |
| 78.88 | 7  | 7 High  | High | High | High | High | High |
| 78.74 | 11 | 0 High  | High | High | High | High | High |
| 78.48 | 20 | 16 High | High | High | High | High | High |
| 78.47 | 11 | 0 High  | High | High | High | High | High |
| 77.71 | 18 | 0 High  | High | High | High | High | High |
| 76.77 | 14 | 8 High  | High | High | High | High | High |
| 76.72 | 18 | 0 High  | High | High | High | High | High |
| 76.42 | 14 | 0 High  | High | High | High | High | High |
| 76.39 | 12 | 0 High  | High | High | High | High | High |
| 76.09 | 20 | 2 High  | High | High | High | High | High |
| 75.72 | 3  | 0 High  | High | High | High | High | High |
| 75.69 | 12 | 0 High  | High | High | High | High | High |
| 75.69 | 20 | 0 High  | High | High | High | High | High |
| 75.55 | 18 | 4 High  | High | High | High | High | High |
| 75.08 | 17 | 0 High  | High | High | High | High | High |
| 75.07 | 6  | 0 High  | High | High | High | High | High |
| 75.03 | 14 | 0 High  | High | High | High | High | High |
| 74.94 | 12 | 0 High  | High | High | High | High | High |

|       |    |             |           |           |           |           |           |
|-------|----|-------------|-----------|-----------|-----------|-----------|-----------|
| 74.84 | 19 | 1 Not Found | Not Found |
| 73.95 | 11 | 0 High      | High      | High      | High      | High      | High      |
| 73.66 | 16 | 0 High      | High      | High      | High      | High      | High      |
| 73.59 | 6  | 0 High      | High      | High      | High      | High      | High      |
| 73.3  | 21 | 0 High      | High      | High      | High      | High      | High      |
| 72.99 | 9  | 2 High      | High      | High      | High      | High      | High      |
| 72.79 | 13 | 3 High      | High      | High      | High      | High      | High      |
| 72.32 | 16 | 0 High      | High      | High      | High      | High      | High      |
| 72.02 | 15 | 0 High      | High      | High      | High      | High      | High      |
| 71.24 | 17 | 0 High      | High      | High      | High      | High      | High      |
| 71.24 | 7  | 0 High      | High      | High      | High      | High      | High      |
| 71.13 | 11 | 0 High      | High      | High      | High      | High      | High      |
| 69.5  | 11 | 0 High      | High      | High      | High      | High      | High      |
| 68.5  | 14 | 0 High      | High      | High      | High      | High      | High      |
| 68.26 | 11 | 0 High      | High      | High      | High      | High      | High      |
| 66.71 | 15 | 2 High      | High      | High      | High      | High      | High      |
| 66.6  | 12 | 0 High      | High      | High      | High      | High      | High      |
| 66.45 | 12 | 0 High      | High      | High      | High      | High      | High      |
| 66.29 | 4  | 0 High      | High      | High      | High      | High      | High      |
| 65.69 | 14 | 0 High      | High      | High      | High      | High      | High      |
| 64.93 | 17 | 0 High      | High      | High      | High      | High      | High      |
| 64.86 | 15 | 0 High      | High      | High      | High      | High      | High      |
| 64.64 | 14 | 11 High     | High      | High      | High      | High      | High      |
| 64.33 | 14 | 1 High      | High      | High      | High      | High      | High      |
| 64.26 | 7  | 0 High      | High      | High      | High      | High      | High      |
| 64.25 | 15 | 0 High      | High      | High      | High      | High      | High      |
| 63.94 | 15 | 0 High      | High      | High      | High      | High      | High      |
| 63.53 | 10 | 0 High      | High      | High      | High      | High      | High      |
| 63    | 18 | 0 High      | High      | High      | High      | High      | High      |
| 62.99 | 6  | 0 High      | High      | High      | High      | High      | High      |
| 62.98 | 18 | 0 High      | High      | High      | High      | High      | High      |
| 62.85 | 12 | 0 High      | High      | High      | High      | High      | High      |
| 62.49 | 7  | 0 High      | High      | High      | High      | High      | High      |
| 61.5  | 10 | 0 High      | High      | High      | High      | High      | High      |
| 61.26 | 10 | 0 High      | High      | High      | High      | High      | High      |
| 61    | 9  | 2 High      | High      | High      | High      | High      | High      |
| 60.98 | 5  | 0 High      | High      | High      | High      | High      | High      |
| 60.88 | 13 | 0 High      | High      | High      | High      | High      | High      |
| 60.54 | 11 | 5 High      | High      | High      | High      | High      | High      |
| 59.94 | 14 | 0 High      | High      | High      | High      | High      | High      |
| 59.87 | 14 | 5 High      | High      | High      | High      | High      | High      |
| 59.84 | 15 | 6 High      | High      | High      | High      | High      | High      |
| 59.59 | 10 | 0 High      | High      | High      | High      | High      | High      |
| 59.3  | 14 | 0 High      | High      | High      | High      | High      | High      |
| 58.56 | 9  | 0 High      | High      | High      | High      | High      | High      |
| 57.97 | 6  | 0 High      | High      | High      | High      | High      | High      |
| 57.93 | 12 | 1 High      | High      | High      | High      | High      | High      |
| 57.61 | 9  | 0 High      | High      | High      | High      | High      | High      |
| 57.52 | 10 | 0 High      | High      | High      | High      | High      | High      |
| 57.04 | 7  | 0 High      | High      | High      | High      | High      | High      |
| 56.94 | 10 | 1 High      | High      | High      | High      | High      | High      |

|       |    |             |           |           |           |           |           |
|-------|----|-------------|-----------|-----------|-----------|-----------|-----------|
| 56.76 | 12 | 0 High      | High      | High      | High      | High      | High      |
| 56.75 | 10 | 2 Not Found | Not Found |
| 55.92 | 11 | 0 High      | High      | High      | High      | High      | High      |
| 55.72 | 15 | 0 High      | High      | High      | High      | High      | High      |
| 55.69 | 11 | 0 High      | High      | High      | High      | High      | High      |
| 55.54 | 12 | 0 High      | High      | High      | High      | High      | High      |
| 55.49 | 13 | 0 High      | High      | High      | High      | High      | High      |
| 55.48 | 19 | 0 High      | High      | High      | High      | High      | High      |
| 55.18 | 8  | 0 High      | High      | High      | High      | High      | High      |
| 54.9  | 8  | 0 High      | High      | High      | High      | High      | High      |
| 54.46 | 7  | 0 High      | High      | High      | High      | High      | High      |
| 54.36 | 16 | 15 High     | High      | High      | High      | High      | High      |
| 54.35 | 10 | 0 High      | High      | High      | High      | High      | High      |
| 54.17 | 12 | 0 High      | High      | High      | High      | High      | High      |
| 53.85 | 13 | 1 High      | High      | High      | High      | High      | High      |
| 53.73 | 16 | 0 High      | High      | High      | High      | High      | High      |
| 53.58 | 11 | 0 High      | High      | High      | High      | High      | High      |
| 53.49 | 14 | 0 High      | High      | High      | High      | High      | High      |
| 53.3  | 9  | 7 High      | High      | High      | High      | High      | High      |
| 52.98 | 12 | 0 High      | High      | High      | High      | High      | High      |
| 52.97 | 16 | 0 High      | High      | High      | High      | High      | High      |
| 52.95 | 9  | 0 High      | High      | High      | High      | High      | High      |
| 52.9  | 15 | 0 High      | High      | High      | High      | High      | High      |
| 52.76 | 7  | 0 High      | High      | High      | High      | High      | High      |
| 51.99 | 12 | 0 High      | High      | High      | High      | High      | High      |
| 51.79 | 9  | 3 High      | High      | High      | High      | High      | High      |
| 51.72 | 12 | 0 High      | High      | High      | High      | High      | High      |
| 51.69 | 13 | 0 High      | High      | High      | High      | High      | High      |
| 51.33 | 13 | 0 High      | High      | High      | High      | High      | High      |
| 51.32 | 14 | 0 High      | High      | High      | High      | High      | High      |
| 51.1  | 8  | 0 High      | High      | High      | High      | High      | High      |
| 50.93 | 7  | 7 High      | High      | High      | High      | High      | High      |
| 50.7  | 12 | 0 High      | High      | High      | High      | High      | High      |
| 50.65 | 7  | 0 High      | High      | High      | High      | High      | High      |
| 50.54 | 10 | 0 High      | High      | High      | High      | High      | High      |
| 49.87 | 10 | 8 High      | High      | High      | High      | High      | High      |
| 49.51 | 9  | 0 High      | High      | High      | High      | High      | High      |
| 49.5  | 17 | 0 High      | High      | High      | High      | High      | High      |
| 49.44 | 10 | 0 High      | High      | High      | High      | High      | High      |
| 49.2  | 8  | 0 High      | High      | High      | High      | High      | High      |
| 48.86 | 6  | 0 High      | High      | High      | High      | High      | High      |
| 48.61 | 10 | 0 High      | High      | High      | High      | High      | High      |
| 48.49 | 9  | 0 High      | High      | High      | High      | High      | High      |
| 48.31 | 12 | 0 High      | High      | High      | High      | High      | High      |
| 48.29 | 7  | 0 High      | High      | High      | High      | High      | High      |
| 48.13 | 13 | 0 High      | High      | High      | High      | High      | High      |
| 47.73 | 9  | 0 High      | High      | High      | High      | High      | High      |
| 47.71 | 14 | 0 High      | High      | High      | High      | High      | High      |
| 47.36 | 12 | 0 High      | High      | High      | High      | High      | High      |
| 46.82 | 13 | 0 High      | High      | High      | High      | High      | High      |
| 46.76 | 4  | 0 High      | High      | High      | High      | High      | High      |

|       |    |        |      |      |      |      |      |
|-------|----|--------|------|------|------|------|------|
| 46.33 | 7  | 0 High | High | High | High | High | High |
| 46.27 | 11 | 0 High | High | High | High | High | High |
| 46.03 | 7  | 0 High | High | High | High | High | High |
| 45.71 | 7  | 0 High | High | High | High | High | High |
| 45.7  | 5  | 0 High | High | High | High | High | High |
| 45.68 | 5  | 4 High | High | High | High | High | High |
| 45.54 | 8  | 0 High | High | High | High | High | High |
| 45.51 | 9  | 0 High | High | High | High | High | High |
| 45.48 | 11 | 2 High | High | High | High | High | High |
| 45.14 | 10 | 0 High | High | High | High | High | High |
| 45    | 8  | 0 High | High | High | High | High | High |
| 44.97 | 12 | 0 High | High | High | High | High | High |
| 44.93 | 9  | 1 High | High | High | High | High | High |
| 44.71 | 7  | 0 High | High | High | High | High | High |
| 44.55 | 7  | 0 High | High | High | High | High | High |
| 44.4  | 14 | 0 High | High | High | High | High | High |
| 43.75 | 9  | 1 High | High | High | High | High | High |
| 43.71 | 7  | 0 High | High | High | High | High | High |
| 43.54 | 12 | 0 High | High | High | High | High | High |
| 43.43 | 5  | 0 High | High | High | High | High | High |
| 43.4  | 4  | 0 High | High | High | High | High | High |
| 43.35 | 7  | 0 High | High | High | High | High | High |
| 43.22 | 10 | 3 High | High | High | High | High | High |
| 43.12 | 7  | 5 High | High | High | High | High | High |
| 43.01 | 14 | 5 High | High | High | High | High | High |
| 42.9  | 9  | 0 High | High | High | High | High | High |
| 42.68 | 6  | 4 High | High | High | High | High | High |
| 41.86 | 9  | 5 High | High | High | High | High | High |
| 41.59 | 8  | 0 High | High | High | High | High | High |
| 41.56 | 8  | 0 High | High | High | High | High | High |
| 41.44 | 4  | 0 High | High | High | High | High | High |
| 41.39 | 7  | 0 High | High | High | High | High | High |
| 41.32 | 10 | 1 High | High | High | High | High | High |
| 41.18 | 9  | 0 High | High | High | High | High | High |
| 41.1  | 8  | 0 High | High | High | High | High | High |
| 40.93 | 12 | 0 High | High | High | High | High | High |
| 40.68 | 6  | 0 High | High | High | High | High | High |
| 40.61 | 12 | 8 High | High | High | High | High | High |
| 40.16 | 6  | 0 High | High | High | High | High | High |
| 40.12 | 12 | 0 High | High | High | High | High | High |
| 39.98 | 13 | 0 High | High | High | High | High | High |
| 39.94 | 9  | 0 High | High | High | High | High | High |
| 39.84 | 6  | 0 High | High | High | High | High | High |
| 39.65 | 5  | 0 High | High | High | High | High | High |
| 39.43 | 13 | 0 High | High | High | High | High | High |
| 39.35 | 3  | 0 High | High | High | High | High | High |
| 39.28 | 13 | 0 High | High | High | High | High | High |
| 39.28 | 6  | 4 High | High | High | High | High | High |
| 39.23 | 7  | 0 High | High | High | High | High | High |
| 38.98 | 10 | 0 High | High | High | High | High | High |
| 38.84 | 13 | 0 High | High | High | High | High | High |



|       |    |             |           |           |           |           |           |
|-------|----|-------------|-----------|-----------|-----------|-----------|-----------|
| 33.92 | 4  | 0 High      | High      | High      | High      | High      | High      |
| 33.86 | 3  | 0 High      | High      | High      | High      | High      | High      |
| 33.64 | 5  | 0 High      | High      | High      | High      | High      | High      |
| 33.41 | 7  | 0 High      | High      | High      | High      | High      | High      |
| 33.36 | 10 | 0 High      | High      | High      | High      | High      | High      |
| 33.29 | 6  | 0 High      | High      | High      | High      | High      | High      |
| 33.27 | 4  | 1 High      | High      | High      | High      | High      | High      |
| 33.23 | 7  | 0 High      | High      | High      | High      | High      | High      |
| 32.96 | 2  | 0 High      | High      | High      | High      | High      | High      |
| 32.75 | 9  | 0 High      | High      | High      | High      | High      | High      |
| 32.73 | 8  | 0 High      | High      | High      | High      | High      | High      |
| 32.62 | 9  | 0 High      | High      | High      | High      | High      | High      |
| 32.54 | 4  | 2 High      | High      | High      | High      | High      | High      |
| 32.53 | 7  | 0 High      | High      | High      | High      | High      | High      |
| 32.51 | 3  | 0 High      | High      | High      | High      | High      | High      |
| 32.5  | 8  | 1 High      | High      | High      | High      | High      | High      |
| 32.1  | 4  | 1 High      | High      | High      | High      | High      | High      |
| 32.03 | 6  | 0 High      | High      | High      | High      | High      | High      |
| 31.99 | 10 | 0 High      | High      | High      | High      | High      | High      |
| 31.97 | 10 | 0 High      | High      | High      | High      | High      | High      |
| 31.94 | 5  | 1 High      | High      | High      | High      | High      | High      |
| 31.93 | 3  | 0 High      | High      | High      | High      | High      | High      |
| 31.75 | 5  | 0 High      | High      | High      | High      | High      | High      |
| 31.51 | 9  | 0 High      | High      | High      | High      | High      | High      |
| 31.38 | 6  | 1 High      | High      | High      | High      | High      | High      |
| 31.32 | 7  | 0 High      | High      | High      | High      | High      | High      |
| 31.3  | 7  | 0 High      | High      | High      | High      | High      | High      |
| 31.29 | 4  | 3 High      | High      | High      | High      | High      | High      |
| 31.15 | 8  | 0 High      | High      | High      | High      | High      | High      |
| 31.13 | 3  | 0 High      | High      | High      | High      | High      | High      |
| 30.69 | 2  | 0 High      | High      | High      | High      | High      | High      |
| 30.67 | 5  | 0 High      | High      | High      | High      | High      | High      |
| 30.62 | 5  | 0 High      | High      | High      | High      | High      | High      |
| 30.61 | 7  | 0 High      | High      | High      | High      | High      | High      |
| 30.45 | 9  | 0 High      | High      | High      | High      | High      | High      |
| 30.45 | 9  | 0 High      | High      | High      | High      | High      | High      |
| 30.44 | 9  | 0 High      | High      | High      | High      | High      | High      |
| 30.43 | 2  | 0 Not Found | Not Found |
| 30.42 | 9  | 2 High      | High      | High      | High      | High      | High      |
| 30.06 | 5  | 0 High      | High      | High      | High      | High      | High      |
| 30.01 | 10 | 0 High      | High      | High      | High      | High      | High      |
| 29.97 | 8  | 0 High      | High      | High      | High      | High      | High      |
| 29.89 | 10 | 0 High      | High      | High      | High      | High      | High      |
| 29.89 | 8  | 0 High      | High      | High      | High      | High      | High      |
| 29.83 | 10 | 5 High      | High      | High      | High      | High      | High      |
| 29.74 | 3  | 0 High      | High      | High      | High      | High      | High      |
| 29.74 | 8  | 0 High      | High      | High      | High      | High      | High      |
| 29.49 | 3  | 0 High      | High      | High      | High      | High      | High      |
| 29.44 | 9  | 0 High      | High      | High      | High      | High      | High      |
| 29.32 | 3  | 0 High      | High      | High      | High      | High      | High      |
| 29.23 | 7  | 0 High      | High      | High      | High      | High      | High      |



|       |   |             |           |           |           |           |           |
|-------|---|-------------|-----------|-----------|-----------|-----------|-----------|
| 29.23 | 4 | 0 High      | High      | High      | High      | High      | High      |
| 29.13 | 5 | 0 High      | High      | High      | High      | High      | High      |
| 29.01 | 7 | 0 High      | High      | High      | High      | High      | High      |
| 29.01 | 3 | 0 High      | High      | High      | High      | High      | High      |
| 28.95 | 3 | 0 High      | High      | High      | High      | High      | High      |
| 28.93 | 3 | 0 High      | High      | High      | High      | High      | High      |
| 28.92 | 8 | 0 High      | High      | High      | High      | High      | High      |
| 28.87 | 7 | 0 High      | High      | High      | High      | High      | High      |
| 28.86 | 7 | 0 High      | High      | High      | High      | High      | High      |
| 28.86 | 2 | 0 High      | High      | High      | High      | High      | High      |
| 28.83 | 9 | 0 High      | High      | High      | High      | High      | High      |
| 28.74 | 6 | 0 High      | High      | High      | High      | High      | High      |
| 28.74 | 8 | 0 High      | High      | High      | High      | High      | High      |
| 28.72 | 4 | 0 High      | High      | High      | High      | High      | High      |
| 28.65 | 3 | 0 High      | High      | High      | High      | High      | High      |
| 28.55 | 4 | 0 High      | High      | High      | High      | High      | High      |
| 28.48 | 3 | 1 High      | High      | High      | High      | High      | High      |
| 28.32 | 4 | 3 High      | High      | High      | High      | High      | High      |
| 28.28 | 3 | 0 High      | High      | High      | High      | High      | High      |
| 27.97 | 2 | 0 High      | High      | High      | High      | High      | High      |
| 27.79 | 7 | 0 High      | High      | High      | High      | High      | High      |
| 27.75 | 2 | 0 High      | High      | High      | High      | High      | High      |
| 27.75 | 2 | 0 Not Found | Not Found |
| 27.74 | 5 | 0 High      | High      | High      | High      | High      | High      |
| 27.71 | 3 | 1 High      | High      | High      | High      | High      | High      |
| 27.67 | 9 | 0 High      | High      | High      | High      | High      | High      |
| 27.5  | 2 | 0 High      | High      | High      | High      | High      | High      |
| 27.39 | 3 | 1 High      | High      | High      | High      | High      | High      |
| 27.35 | 3 | 2 Not Found | Not Found |
| 27.29 | 4 | 0 High      | High      | High      | High      | High      | High      |
| 27.22 | 9 | 0 High      | High      | High      | High      | High      | High      |
| 27.13 | 4 | 0 High      | High      | High      | High      | High      | High      |
| 27.07 | 3 | 0 High      | High      | High      | High      | High      | High      |
| 27.04 | 2 | 0 High      | High      | High      | High      | High      | High      |
| 26.98 | 8 | 0 High      | High      | High      | High      | High      | High      |
| 26.85 | 3 | 2 High      | High      | High      | High      | High      | High      |
| 26.71 | 2 | 0 Not Found | Not Found |
| 26.68 | 7 | 0 High      | High      | High      | High      | High      | High      |
| 26.68 | 7 | 0 High      | High      | High      | High      | High      | High      |
| 26.57 | 6 | 5 High      | High      | High      | High      | High      | High      |
| 26.43 | 3 | 0 High      | High      | High      | High      | High      | High      |
| 26.41 | 7 | 0 High      | High      | High      | High      | High      | High      |
| 26.35 | 7 | 0 High      | High      | High      | High      | High      | High      |
| 26.12 | 6 | 0 High      | High      | High      | High      | High      | High      |
| 26.12 | 4 | 3 High      | High      | High      | High      | High      | High      |
| 26.11 | 2 | 0 High      | High      | High      | High      | High      | High      |
| 26.1  | 7 | 0 High      | High      | High      | High      | High      | High      |
| 26.09 | 2 | 0 High      | High      | High      | High      | High      | High      |
| 26    | 5 | 0 High      | High      | High      | High      | High      | High      |
| 25.98 | 8 | 0 High      | High      | High      | High      | High      | High      |
| 25.98 | 4 | 0 High      | High      | High      | High      | High      | High      |

|       |   |             |           |           |           |           |           |
|-------|---|-------------|-----------|-----------|-----------|-----------|-----------|
| 25.94 | 8 | 0 High      | High      | High      | High      | High      | High      |
| 25.84 | 7 | 0 High      | High      | High      | High      | High      | High      |
| 25.8  | 3 | 0 High      | High      | High      | High      | High      | High      |
| 25.76 | 3 | 0 High      | High      | High      | High      | High      | High      |
| 25.56 | 3 | 0 High      | High      | High      | High      | High      | High      |
| 25.55 | 2 | 0 Not Found | Not Found |
| 25.47 | 7 | 0 High      | High      | High      | High      | High      | High      |
| 25.4  | 3 | 0 High      | High      | High      | High      | High      | High      |
| 25.38 | 5 | 0 High      | High      | High      | High      | High      | High      |
| 25.29 | 2 | 0 High      | High      | High      | High      | High      | High      |
| 25.26 | 2 | 0 High      | High      | High      | High      | High      | High      |
| 25.22 | 9 | 0 High      | High      | High      | High      | High      | High      |
| 25.18 | 3 | 1 High      | High      | High      | High      | High      | High      |
| 24.99 | 9 | 0 High      | High      | High      | High      | High      | High      |
| 24.94 | 5 | 0 High      | High      | High      | High      | High      | High      |
| 24.92 | 3 | 0 High      | High      | High      | High      | High      | High      |
| 24.85 | 2 | 0 High      | High      | High      | High      | High      | High      |
| 24.79 | 6 | 0 High      | High      | High      | High      | High      | High      |
| 24.78 | 7 | 0 High      | High      | High      | High      | High      | High      |
| 24.69 | 5 | 0 High      | High      | High      | High      | High      | High      |
| 24.59 | 5 | 0 High      | High      | High      | High      | High      | High      |
| 24.57 | 8 | 0 High      | High      | High      | High      | High      | High      |
| 24.56 | 5 | 0 High      | High      | High      | High      | High      | High      |
| 24.52 | 2 | 0 High      | High      | High      | High      | High      | High      |
| 24.51 | 5 | 2 High      | High      | High      | High      | High      | High      |
| 24.5  | 6 | 0 High      | High      | High      | High      | High      | High      |
| 24.4  | 3 | 0 High      | High      | High      | High      | High      | High      |
| 24.36 | 2 | 0 High      | High      | High      | High      | High      | High      |
| 24.35 | 5 | 0 High      | High      | High      | High      | High      | High      |
| 24.34 | 4 | 2 High      | High      | High      | High      | High      | High      |
| 24.32 | 3 | 0 High      | High      | High      | High      | High      | High      |
| 24.27 | 3 | 2 High      | High      | High      | High      | High      | High      |
| 24.26 | 2 | 0 High      | High      | High      | High      | High      | High      |
| 24.23 | 8 | 0 High      | High      | High      | High      | High      | High      |
| 24.22 | 6 | 0 High      | High      | High      | High      | High      | High      |
| 24.11 | 4 | 0 High      | High      | High      | High      | High      | High      |
| 24.09 | 8 | 0 High      | High      | High      | High      | High      | High      |
| 24.07 | 6 | 0 High      | High      | High      | High      | High      | High      |
| 24.03 | 9 | 0 High      | High      | High      | High      | High      | High      |
| 24.01 | 8 | 0 High      | High      | High      | High      | High      | High      |
| 24    | 5 | 1 High      | High      | High      | High      | High      | High      |
| 23.97 | 4 | 1 High      | High      | High      | High      | High      | High      |
| 23.79 | 3 | 0 High      | High      | High      | High      | High      | High      |
| 23.78 | 6 | 2 High      | High      | High      | High      | High      | High      |
| 23.78 | 8 | 0 High      | High      | High      | High      | High      | High      |
| 23.73 | 2 | 0 High      | High      | High      | High      | High      | High      |
| 23.7  | 2 | 0 High      | High      | High      | High      | High      | High      |
| 23.66 | 6 | 0 High      | High      | High      | High      | High      | High      |
| 23.65 | 2 | 0 High      | High      | High      | High      | High      | High      |
| 23.62 | 2 | 0 High      | High      | High      | High      | High      | High      |
| 23.44 | 6 | 0 High      | High      | High      | High      | High      | High      |

|       |   |             |           |           |           |           |           |
|-------|---|-------------|-----------|-----------|-----------|-----------|-----------|
| 23.43 | 2 | 0 High      | High      | High      | High      | High      | High      |
| 23.41 | 6 | 0 High      | High      | High      | High      | High      | High      |
| 23.38 | 2 | 0 High      | High      | High      | High      | High      | High      |
| 23.32 | 5 | 0 High      | High      | High      | High      | High      | High      |
| 23.21 | 3 | 0 High      | High      | High      | High      | High      | High      |
| 23.17 | 6 | 0 High      | High      | High      | High      | High      | High      |
| 23.16 | 3 | 0 High      | High      | High      | High      | High      | High      |
| 23.14 | 5 | 1 High      | High      | High      | High      | High      | High      |
| 23.12 | 6 | 0 High      | High      | High      | High      | High      | High      |
| 23.08 | 3 | 1 Not Found | Not Found |
| 23.08 | 5 | 0 High      | High      | High      | High      | High      | High      |
| 23.03 | 3 | 1 High      | High      | High      | High      | High      | High      |
| 22.99 | 6 | 5 High      | High      | High      | High      | High      | High      |
| 22.93 | 2 | 0 High      | High      | High      | High      | High      | High      |
| 22.9  | 8 | 0 High      | High      | High      | High      | High      | High      |
| 22.89 | 2 | 0 High      | High      | High      | High      | High      | High      |
| 22.89 | 6 | 0 High      | High      | High      | High      | High      | High      |
| 22.82 | 2 | 0 High      | High      | High      | High      | High      | High      |
| 22.73 | 8 | 0 High      | High      | High      | High      | High      | High      |
| 22.64 | 5 | 1 High      | High      | High      | High      | High      | High      |
| 22.6  | 5 | 0 High      | High      | High      | High      | High      | High      |
| 22.55 | 4 | 0 High      | High      | High      | High      | High      | High      |
| 22.52 | 2 | 0 High      | High      | High      | High      | High      | High      |
| 22.51 | 7 | 0 High      | High      | High      | High      | High      | High      |
| 22.44 | 2 | 0 High      | High      | High      | High      | High      | High      |
| 22.43 | 7 | 1 High      | High      | High      | High      | High      | High      |
| 22.33 | 5 | 0 High      | High      | High      | High      | High      | High      |
| 22.32 | 7 | 3 High      | High      | High      | High      | High      | High      |
| 22.26 | 4 | 2 High      | High      | High      | High      | High      | High      |
| 22.24 | 6 | 0 High      | High      | High      | High      | High      | High      |
| 22.23 | 3 | 0 High      | High      | High      | High      | High      | High      |
| 22.21 | 6 | 0 High      | High      | High      | High      | High      | High      |
| 22.2  | 3 | 0 High      | High      | High      | High      | High      | High      |
| 22.2  | 7 | 0 High      | High      | High      | High      | High      | High      |
| 22.19 | 6 | 0 High      | High      | High      | High      | High      | High      |
| 22.16 | 5 | 0 High      | High      | High      | High      | High      | High      |
| 22.05 | 7 | 0 High      | High      | High      | High      | High      | High      |
| 22.01 | 3 | 1 High      | High      | High      | High      | High      | High      |
| 22    | 8 | 5 High      | High      | High      | High      | High      | High      |
| 21.95 | 4 | 0 Not Found | Not Found |
| 21.94 | 6 | 1 High      | High      | High      | High      | High      | High      |
| 21.93 | 6 | 0 High      | High      | High      | High      | High      | High      |
| 21.82 | 2 | 0 High      | High      | High      | High      | High      | High      |
| 21.81 | 6 | 0 High      | High      | High      | High      | High      | High      |
| 21.79 | 7 | 0 High      | High      | High      | High      | High      | High      |
| 21.79 | 5 | 0 High      | High      | High      | High      | High      | High      |
| 21.75 | 6 | 0 High      | High      | High      | High      | High      | High      |
| 21.74 | 7 | 0 High      | High      | High      | High      | High      | High      |
| 21.74 | 2 | 0 High      | High      | High      | High      | High      | High      |
| 21.72 | 3 | 0 High      | High      | High      | High      | High      | High      |
| 21.7  | 9 | 0 High      | High      | High      | High      | High      | High      |

|       |   |        |      |      |      |      |      |
|-------|---|--------|------|------|------|------|------|
| 21.67 | 2 | 0 High | High | High | High | High | High |
| 21.65 | 5 | 0 High | High | High | High | High | High |
| 21.59 | 3 | 0 High | High | High | High | High | High |
| 21.58 | 8 | 0 High | High | High | High | High | High |
| 21.51 | 6 | 0 High | High | High | High | High | High |
| 21.5  | 3 | 0 High | High | High | High | High | High |
| 21.46 | 5 | 0 High | High | High | High | High | High |
| 21.44 | 7 | 0 High | High | High | High | High | High |
| 21.44 | 7 | 0 High | High | High | High | High | High |
| 21.41 | 6 | 0 High | High | High | High | High | High |
| 21.36 | 4 | 0 High | High | High | High | High | High |
| 21.35 | 3 | 0 High | High | High | High | High | High |
| 21.34 | 6 | 0 High | High | High | High | High | High |
| 21.31 | 5 | 0 High | High | High | High | High | High |
| 21.28 | 4 | 2 High | High | High | High | High | High |
| 21.26 | 6 | 0 High | High | High | High | High | High |
| 21.23 | 6 | 0 High | High | High | High | High | High |
| 21.14 | 4 | 0 High | High | High | High | High | High |
| 21.1  | 3 | 0 High | High | High | High | High | High |
| 21.01 | 5 | 0 High | High | High | High | High | High |
| 20.97 | 8 | 0 High | High | High | High | High | High |
| 20.97 | 5 | 0 High | High | High | High | High | High |
| 20.88 | 6 | 0 High | High | High | High | High | High |
| 20.85 | 2 | 0 High | High | High | High | High | High |
| 20.84 | 3 | 1 High | High | High | High | High | High |
| 20.84 | 4 | 1 High | High | High | High | High | High |
| 20.84 | 3 | 0 High | High | High | High | High | High |
| 20.83 | 4 | 0 High | High | High | High | High | High |
| 20.82 | 7 | 0 High | High | High | High | High | High |
| 20.74 | 6 | 0 High | High | High | High | High | High |
| 20.7  | 3 | 2 High | High | High | High | High | High |
| 20.69 | 4 | 0 High | High | High | High | High | High |
| 20.68 | 6 | 0 High | High | High | High | High | High |
| 20.62 | 7 | 0 High | High | High | High | High | High |
| 20.56 | 4 | 0 High | High | High | High | High | High |
| 20.53 | 7 | 0 High | High | High | High | High | High |
| 20.5  | 3 | 0 High | High | High | High | High | High |
| 20.42 | 3 | 0 High | High | High | High | High | High |
| 20.38 | 5 | 0 High | High | High | High | High | High |
| 20.37 | 2 | 1 High | High | High | High | High | High |
| 20.37 | 5 | 4 High | High | High | High | High | High |
| 20.3  | 3 | 0 High | High | High | High | High | High |
| 20.22 | 3 | 0 High | High | High | High | High | High |
| 20.2  | 3 | 0 High | High | High | High | High | High |
| 20.2  | 6 | 0 High | High | High | High | High | High |
| 20.09 | 3 | 0 High | High | High | High | High | High |
| 20.09 | 4 | 0 High | High | High | High | High | High |
| 20.07 | 5 | 0 High | High | High | High | High | High |
| 19.95 | 4 | 0 High | High | High | High | High | High |
| 19.94 | 5 | 0 High | High | High | High | High | High |
| 19.94 | 4 | 0 High | High | High | High | High | High |

|       |   |        |      |      |      |      |      |
|-------|---|--------|------|------|------|------|------|
| 19.92 | 3 | 0 High | High | High | High | High | High |
| 19.89 | 7 | 0 High | High | High | High | High | High |
| 19.84 | 6 | 0 High | High | High | High | High | High |
| 19.77 | 6 | 0 High | High | High | High | High | High |
| 19.76 | 3 | 1 High | High | High | High | High | High |
| 19.55 | 3 | 0 High | High | High | High | High | High |
| 19.55 | 4 | 0 High | High | High | High | High | High |
| 19.54 | 5 | 0 High | High | High | High | High | High |
| 19.52 | 2 | 0 High | High | High | High | High | High |
| 19.43 | 6 | 0 High | High | High | High | High | High |
| 19.43 | 6 | 0 High | High | High | High | High | High |
| 19.41 | 8 | 4 High | High | High | High | High | High |
| 19.35 | 4 | 0 High | High | High | High | High | High |
| 19.34 | 5 | 0 High | High | High | High | High | High |
| 19.26 | 5 | 0 High | High | High | High | High | High |
| 19.23 | 3 | 0 High | High | High | High | High | High |
| 19.13 | 2 | 0 High | High | High | High | High | High |
| 19.05 | 3 | 1 High | High | High | High | High | High |
| 19.05 | 2 | 0 High | High | High | High | High | High |
| 19.04 | 4 | 2 High | High | High | High | High | High |
| 18.94 | 5 | 0 High | High | High | High | High | High |
| 18.89 | 6 | 0 High | High | High | High | High | High |
| 18.87 | 4 | 0 High | High | High | High | High | High |
| 18.86 | 4 | 0 High | High | High | High | High | High |
| 18.84 | 4 | 2 High | High | High | High | High | High |
| 18.67 | 5 | 0 High | High | High | High | High | High |
| 18.66 | 6 | 0 High | High | High | High | High | High |
| 18.62 | 4 | 0 High | High | High | High | High | High |
| 18.62 | 5 | 0 High | High | High | High | High | High |
| 18.51 | 4 | 1 High | High | High | High | High | High |
| 18.45 | 6 | 0 High | High | High | High | High | High |
| 18.45 | 5 | 0 High | High | High | High | High | High |
| 18.29 | 3 | 0 High | High | High | High | High | High |
| 18.27 | 5 | 0 High | High | High | High | High | High |
| 18.26 | 2 | 0 High | High | High | High | High | High |
| 18.19 | 2 | 0 High | High | High | High | High | High |
| 18.18 | 5 | 0 High | High | High | High | High | High |
| 18.13 | 3 | 0 High | High | High | High | High | High |
| 18.12 | 5 | 3 High | High | High | High | High | High |
| 18.1  | 4 | 3 High | High | High | High | High | High |
| 18.05 | 7 | 0 High | High | High | High | High | High |
| 18.04 | 2 | 0 High | High | High | High | High | High |
| 18.01 | 3 | 0 High | High | High | High | High | High |
| 18    | 3 | 0 High | High | High | High | High | High |
| 17.93 | 5 | 0 High | High | High | High | High | High |
| 17.89 | 5 | 0 High | High | High | High | High | High |
| 17.82 | 6 | 0 High | High | High | High | High | High |
| 17.78 | 3 | 0 High | High | High | High | High | High |
| 17.76 | 3 | 0 High | High | High | High | High | High |
| 17.74 | 5 | 1 High | High | High | High | High | High |
| 17.68 | 2 | 0 High | High | High | High | High | High |

|       |   |             |           |           |           |           |           |
|-------|---|-------------|-----------|-----------|-----------|-----------|-----------|
| 17.68 | 3 | 0 High      | High      | High      | High      | High      | High      |
| 17.68 | 3 | 1 Not Found | Not Found |
| 17.67 | 3 | 0 High      | High      | High      | High      | High      | High      |
| 17.65 | 7 | 0 High      | High      | High      | High      | High      | High      |
| 17.64 | 2 | 0 High      | High      | High      | High      | High      | High      |
| 17.56 | 5 | 2 High      | High      | High      | High      | High      | High      |
| 17.53 | 3 | 1 High      | High      | High      | High      | High      | High      |
| 17.52 | 4 | 0 High      | High      | High      | High      | High      | High      |
| 17.51 | 4 | 0 High      | High      | High      | High      | High      | High      |
| 17.51 | 4 | 0 High      | High      | High      | High      | High      | High      |
| 17.46 | 3 | 1 High      | High      | High      | High      | High      | High      |
| 17.45 | 3 | 0 Not Found | Not Found |
| 17.45 | 3 | 0 High      | High      | High      | High      | High      | High      |
| 17.42 | 3 | 0 High      | High      | High      | High      | High      | High      |
| 17.35 | 3 | 0 High      | High      | High      | High      | High      | High      |
| 17.28 | 3 | 0 High      | High      | High      | High      | High      | High      |
| 17.26 | 6 | 0 High      | High      | High      | High      | High      | High      |
| 17.2  | 5 | 0 High      | High      | High      | High      | High      | High      |
| 17.17 | 6 | 0 High      | High      | High      | High      | High      | High      |
| 17.16 | 3 | 2 High      | High      | High      | High      | High      | High      |
| 17.15 | 5 | 0 High      | High      | High      | High      | High      | High      |
| 17.13 | 3 | 0 High      | High      | High      | High      | High      | High      |
| 17.12 | 5 | 0 High      | High      | High      | High      | High      | High      |
| 17.11 | 2 | 0 High      | High      | High      | High      | High      | High      |
| 17.1  | 2 | 0 High      | High      | High      | High      | High      | High      |
| 17.09 | 5 | 0 High      | High      | High      | High      | High      | High      |
| 17.09 | 2 | 0 High      | High      | High      | High      | High      | High      |
| 17.06 | 4 | 0 High      | High      | High      | High      | High      | High      |
| 17    | 7 | 0 High      | High      | High      | High      | High      | High      |
| 16.95 | 5 | 0 High      | High      | High      | High      | High      | High      |
| 16.93 | 6 | 0 High      | High      | High      | High      | High      | High      |
| 16.9  | 6 | 0 High      | High      | High      | High      | High      | High      |
| 16.89 | 6 | 0 High      | High      | High      | High      | High      | High      |
| 16.81 | 3 | 0 High      | High      | High      | High      | High      | High      |
| 16.8  | 5 | 0 High      | High      | High      | High      | High      | High      |
| 16.77 | 4 | 0 High      | High      | High      | High      | High      | High      |
| 16.7  | 2 | 0 High      | High      | High      | High      | High      | High      |
| 16.7  | 5 | 0 High      | High      | High      | High      | High      | High      |
| 16.7  | 2 | 0 High      | High      | High      | High      | High      | High      |
| 16.7  | 5 | 4 High      | High      | High      | High      | High      | High      |
| 16.7  | 3 | 0 High      | High      | High      | High      | High      | High      |
| 16.69 | 4 | 0 High      | High      | High      | High      | High      | High      |
| 16.62 | 4 | 2 High      | High      | High      | High      | High      | High      |
| 16.59 | 3 | 0 High      | High      | High      | High      | High      | High      |
| 16.49 | 5 | 0 High      | High      | High      | High      | High      | High      |
| 16.48 | 3 | 2 High      | High      | High      | High      | High      | High      |
| 16.45 | 5 | 0 High      | High      | High      | High      | High      | High      |
| 16.44 | 4 | 0 High      | High      | High      | High      | High      | High      |
| 16.4  | 3 | 0 High      | High      | High      | High      | High      | High      |
| 16.39 | 5 | 0 High      | High      | High      | High      | High      | High      |
| 16.37 | 2 | 0 High      | High      | High      | High      | High      | High      |

|       |   |             |           |           |           |           |           |
|-------|---|-------------|-----------|-----------|-----------|-----------|-----------|
| 16.36 | 4 | 0 High      | High      | High      | High      | High      | High      |
| 16.24 | 6 | 0 High      | High      | High      | High      | High      | High      |
| 16.22 | 3 | 0 High      | High      | High      | High      | High      | High      |
| 16.2  | 3 | 0 High      | High      | High      | High      | High      | High      |
| 16.18 | 4 | 0 High      | High      | High      | High      | High      | High      |
| 16.07 | 3 | 0 High      | High      | High      | High      | High      | High      |
| 16.07 | 3 | 1 Not Found | Not Found |
| 15.97 | 4 | 0 High      | High      | High      | High      | High      | High      |
| 15.95 | 6 | 0 High      | High      | High      | High      | High      | High      |
| 15.93 | 2 | 0 High      | High      | High      | High      | High      | High      |
| 15.9  | 4 | 0 High      | High      | High      | High      | High      | High      |
| 15.9  | 4 | 0 High      | High      | High      | High      | High      | High      |
| 15.89 | 2 | 0 High      | High      | High      | High      | High      | High      |
| 15.87 | 4 | 0 High      | High      | High      | High      | High      | High      |
| 15.85 | 3 | 0 High      | High      | High      | High      | High      | High      |
| 15.78 | 2 | 0 High      | High      | High      | High      | High      | High      |
| 15.73 | 3 | 1 High      | High      | High      | High      | High      | High      |
| 15.71 | 3 | 0 High      | High      | High      | High      | High      | High      |
| 15.67 | 3 | 0 High      | High      | High      | High      | High      | High      |
| 15.64 | 2 | 0 High      | High      | High      | High      | High      | High      |
| 15.57 | 5 | 0 High      | High      | High      | High      | High      | High      |
| 15.56 | 6 | 0 High      | High      | High      | High      | High      | High      |
| 15.53 | 6 | 0 High      | High      | High      | High      | High      | High      |
| 15.52 | 6 | 0 High      | High      | High      | High      | High      | High      |
| 15.43 | 4 | 0 High      | High      | High      | High      | High      | High      |
| 15.33 | 5 | 0 High      | High      | High      | High      | High      | High      |
| 15.3  | 5 | 0 High      | High      | High      | High      | High      | High      |
| 15.28 | 5 | 0 High      | High      | High      | High      | High      | High      |
| 15.27 | 4 | 0 High      | High      | High      | High      | High      | High      |
| 15.26 | 4 | 1 High      | High      | High      | High      | High      | High      |
| 15.23 | 4 | 0 High      | High      | High      | High      | High      | High      |
| 15.22 | 4 | 0 High      | High      | High      | High      | High      | High      |
| 15.2  | 5 | 0 High      | High      | High      | High      | High      | High      |
| 15.04 | 4 | 0 High      | High      | High      | High      | High      | High      |
| 15.01 | 5 | 0 High      | High      | High      | High      | High      | High      |
| 14.97 | 2 | 0 High      | High      | High      | High      | High      | High      |
| 14.97 | 2 | 0 High      | High      | High      | High      | High      | High      |
| 14.97 | 2 | 0 High      | High      | High      | High      | High      | High      |
| 14.96 | 4 | 0 High      | High      | High      | High      | High      | High      |
| 14.96 | 7 | 0 High      | High      | High      | High      | High      | High      |
| 14.95 | 5 | 0 High      | High      | High      | High      | High      | High      |
| 14.92 | 4 | 0 High      | High      | High      | High      | High      | High      |
| 14.88 | 5 | 0 High      | High      | High      | High      | High      | High      |
| 14.85 | 2 | 0 High      | High      | High      | High      | High      | High      |
| 14.84 | 3 | 0 High      | High      | High      | High      | High      | High      |
| 14.82 | 4 | 2 High      | High      | High      | High      | High      | High      |
| 14.71 | 5 | 0 High      | High      | High      | High      | High      | High      |
| 14.69 | 4 | 0 High      | High      | High      | High      | High      | High      |
| 14.67 | 3 | 1 High      | High      | High      | High      | High      | High      |
| 14.62 | 3 | 0 High      | High      | High      | High      | High      | High      |
| 14.61 | 3 | 0 High      | High      | High      | High      | High      | High      |

|       |   |        |      |      |      |      |      |
|-------|---|--------|------|------|------|------|------|
| 14.6  | 3 | 0 High | High | High | High | High | High |
| 14.59 | 4 | 0 High | High | High | High | High | High |
| 14.5  | 3 | 0 High | High | High | High | High | High |
| 14.47 | 5 | 0 High | High | High | High | High | High |
| 14.46 | 4 | 0 High | High | High | High | High | High |
| 14.4  | 4 | 0 High | High | High | High | High | High |
| 14.37 | 5 | 0 High | High | High | High | High | High |
| 14.32 | 4 | 0 High | High | High | High | High | High |
| 14.3  | 6 | 0 High | High | High | High | High | High |
| 14.29 | 4 | 3 High | High | High | High | High | High |
| 14.29 | 2 | 0 High | High | High | High | High | High |
| 14.27 | 4 | 0 High | High | High | High | High | High |
| 14.27 | 3 | 0 High | High | High | High | High | High |
| 14.21 | 6 | 0 High | High | High | High | High | High |
| 14.2  | 5 | 0 High | High | High | High | High | High |
| 14.16 | 4 | 0 High | High | High | High | High | High |
| 14.15 | 6 | 0 High | High | High | High | High | High |
| 14.1  | 5 | 0 High | High | High | High | High | High |
| 14.08 | 4 | 0 High | High | High | High | High | High |
| 14.07 | 3 | 2 High | High | High | High | High | High |
| 13.96 | 3 | 0 High | High | High | High | High | High |
| 13.84 | 3 | 0 High | High | High | High | High | High |
| 13.83 | 5 | 0 High | High | High | High | High | High |
| 13.81 | 3 | 0 High | High | High | High | High | High |
| 13.8  | 2 | 0 High | High | High | High | High | High |
| 13.77 | 2 | 0 High | High | High | High | High | High |
| 13.75 | 6 | 0 High | High | High | High | High | High |
| 13.75 | 2 | 0 High | High | High | High | High | High |
| 13.73 | 3 | 0 High | High | High | High | High | High |
| 13.72 | 3 | 0 High | High | High | High | High | High |
| 13.68 | 3 | 0 High | High | High | High | High | High |
| 13.67 | 2 | 0 High | High | High | High | High | High |
| 13.66 | 3 | 0 High | High | High | High | High | High |
| 13.65 | 4 | 0 High | High | High | High | High | High |
| 13.6  | 4 | 1 High | High | High | High | High | High |
| 13.51 | 2 | 0 High | High | High | High | High | High |
| 13.49 | 3 | 2 High | High | High | High | High | High |
| 13.48 | 1 | 0 High | High | High | High | High | High |
| 13.46 | 3 | 0 High | High | High | High | High | High |
| 13.43 | 4 | 1 High | High | High | High | High | High |
| 13.41 | 2 | 0 High | High | High | High | High | High |
| 13.4  | 3 | 0 High | High | High | High | High | High |
| 13.39 | 4 | 0 High | High | High | High | High | High |
| 13.38 | 3 | 0 High | High | High | High | High | High |
| 13.37 | 5 | 0 High | High | High | High | High | High |
| 13.31 | 3 | 0 High | High | High | High | High | High |
| 13.31 | 3 | 1 High | High | High | High | High | High |
| 13.3  | 4 | 0 High | High | High | High | High | High |
| 13.27 | 4 | 0 High | High | High | High | High | High |
| 13.25 | 3 | 0 High | High | High | High | High | High |
| 13.24 | 2 | 0 High | High | High | High | High | High |



|       |   |             |           |           |           |           |           |
|-------|---|-------------|-----------|-----------|-----------|-----------|-----------|
| 13.24 | 2 | 0 High      | High      | High      | High      | High      | High      |
| 13.18 | 3 | 0 High      | High      | High      | High      | High      | High      |
| 13.18 | 4 | 0 High      | High      | High      | High      | High      | High      |
| 13.13 | 2 | 0 High      | High      | High      | High      | High      | High      |
| 13.09 | 3 | 0 High      | High      | High      | High      | High      | High      |
| 13.08 | 3 | 0 High      | High      | High      | High      | High      | High      |
| 13.06 | 3 | 1 High      | High      | High      | High      | High      | High      |
| 13.03 | 2 | 0 High      | High      | High      | High      | High      | High      |
| 13.01 | 4 | 0 High      | High      | High      | High      | High      | High      |
| 13    | 4 | 0 High      | High      | High      | High      | High      | High      |
| 13    | 4 | 0 High      | High      | High      | High      | High      | High      |
| 12.95 | 4 | 0 High      | High      | High      | High      | High      | High      |
| 12.94 | 3 | 1 High      | High      | High      | High      | High      | High      |
| 12.93 | 3 | 0 High      | High      | High      | High      | High      | High      |
| 12.88 | 2 | 0 High      | High      | High      | High      | High      | High      |
| 12.87 | 3 | 0 High      | High      | High      | High      | High      | High      |
| 12.86 | 4 | 0 High      | High      | High      | High      | High      | High      |
| 12.86 | 3 | 0 Not Found | Not Found |
| 12.85 | 3 | 0 High      | High      | High      | High      | High      | High      |
| 12.84 | 5 | 0 High      | High      | High      | High      | High      | High      |
| 12.79 | 5 | 0 High      | High      | High      | High      | High      | High      |
| 12.75 | 4 | 0 High      | High      | High      | High      | High      | High      |
| 12.72 | 3 | 0 High      | High      | High      | High      | High      | High      |
| 12.7  | 4 | 0 High      | High      | High      | High      | High      | High      |
| 12.7  | 3 | 0 High      | High      | High      | High      | High      | High      |
| 12.68 | 3 | 1 High      | High      | High      | High      | High      | High      |
| 12.68 | 3 | 0 High      | High      | High      | High      | High      | High      |
| 12.67 | 5 | 0 High      | High      | High      | High      | High      | High      |
| 12.66 | 4 | 0 High      | High      | High      | High      | High      | High      |
| 12.65 | 4 | 0 High      | High      | High      | High      | High      | High      |
| 12.64 | 3 | 0 High      | High      | High      | High      | High      | High      |
| 12.62 | 2 | 0 High      | High      | High      | High      | High      | High      |
| 12.61 | 3 | 0 Not Found | Not Found |
| 12.61 | 4 | 0 High      | High      | High      | High      | High      | High      |
| 12.6  | 6 | 0 High      | High      | High      | High      | High      | High      |
| 12.48 | 3 | 0 High      | High      | High      | High      | High      | High      |
| 12.42 | 4 | 0 High      | High      | High      | High      | High      | High      |
| 12.42 | 2 | 0 High      | High      | High      | High      | High      | High      |
| 12.41 | 3 | 0 High      | High      | High      | High      | High      | High      |
| 12.4  | 5 | 0 High      | High      | High      | High      | High      | High      |
| 12.39 | 5 | 0 High      | High      | High      | High      | High      | High      |
| 12.38 | 5 | 0 High      | High      | High      | High      | High      | High      |
| 12.37 | 2 | 0 High      | High      | High      | High      | High      | High      |
| 12.37 | 4 | 0 High      | High      | High      | High      | High      | High      |
| 12.34 | 3 | 0 High      | High      | High      | High      | High      | High      |
| 12.31 | 3 | 0 High      | High      | High      | High      | High      | High      |
| 12.3  | 5 | 0 High      | High      | High      | High      | High      | High      |
| 12.28 | 3 | 0 High      | High      | High      | High      | High      | High      |
| 12.28 | 3 | 0 High      | High      | High      | High      | High      | High      |
| 12.27 | 3 | 0 High      | High      | High      | High      | High      | High      |
| 12.23 | 2 | 0 High      | High      | High      | High      | High      | High      |

|       |   |        |      |      |      |      |      |
|-------|---|--------|------|------|------|------|------|
| 12.23 | 3 | 0 High | High | High | High | High | High |
| 12.2  | 2 | 0 High | High | High | High | High | High |
| 12.17 | 4 | 0 High | High | High | High | High | High |
| 12.14 | 2 | 0 High | High | High | High | High | High |
| 12.11 | 2 | 0 High | High | High | High | High | High |
| 12.1  | 3 | 0 High | High | High | High | High | High |
| 12.08 | 2 | 0 High | High | High | High | High | High |
| 12.05 | 4 | 0 High | High | High | High | High | High |
| 12.03 | 4 | 0 High | High | High | High | High | High |
| 12.02 | 2 | 0 High | High | High | High | High | High |
| 12.02 | 3 | 0 High | High | High | High | High | High |
| 11.98 | 4 | 0 High | High | High | High | High | High |
| 11.97 | 2 | 0 High | High | High | High | High | High |
| 11.97 | 4 | 0 High | High | High | High | High | High |
| 11.96 | 4 | 0 High | High | High | High | High | High |
| 11.96 | 2 | 0 High | High | High | High | High | High |
| 11.95 | 3 | 0 High | High | High | High | High | High |
| 11.95 | 3 | 0 High | High | High | High | High | High |
| 11.93 | 5 | 0 High | High | High | High | High | High |
| 11.86 | 3 | 0 High | High | High | High | High | High |
| 11.84 | 3 | 0 High | High | High | High | High | High |
| 11.84 | 2 | 0 High | High | High | High | High | High |
| 11.83 | 3 | 0 High | High | High | High | High | High |
| 11.81 | 2 | 0 High | High | High | High | High | High |
| 11.81 | 3 | 0 High | High | High | High | High | High |
| 11.76 | 2 | 0 High | High | High | High | High | High |
| 11.74 | 3 | 0 High | High | High | High | High | High |
| 11.73 | 2 | 0 High | High | High | High | High | High |
| 11.73 | 4 | 2 High | High | High | High | High | High |
| 11.7  | 4 | 0 High | High | High | High | High | High |
| 11.7  | 3 | 0 High | High | High | High | High | High |
| 11.68 | 2 | 0 High | High | High | High | High | High |
| 11.68 | 4 | 0 High | High | High | High | High | High |
| 11.67 | 3 | 0 High | High | High | High | High | High |
| 11.66 | 3 | 0 High | High | High | High | High | High |
| 11.64 | 2 | 0 High | High | High | High | High | High |
| 11.58 | 2 | 0 High | High | High | High | High | High |
| 11.56 | 3 | 0 High | High | High | High | High | High |
| 11.56 | 4 | 0 High | High | High | High | High | High |
| 11.53 | 2 | 0 High | High | High | High | High | High |
| 11.51 | 3 | 0 High | High | High | High | High | High |
| 11.5  | 2 | 0 High | High | High | High | High | High |
| 11.49 | 3 | 0 High | High | High | High | High | High |
| 11.49 | 3 | 0 High | High | High | High | High | High |
| 11.47 | 3 | 0 High | High | High | High | High | High |
| 11.46 | 4 | 0 High | High | High | High | High | High |
| 11.45 | 4 | 0 High | High | High | High | High | High |
| 11.42 | 3 | 0 High | High | High | High | High | High |
| 11.41 | 2 | 0 High | High | High | High | High | High |
| 11.4  | 4 | 0 High | High | High | High | High | High |
| 11.4  | 3 | 0 High | High | High | High | High | High |



|       |   |             |           |           |           |           |           |
|-------|---|-------------|-----------|-----------|-----------|-----------|-----------|
| 10.51 | 3 | 0 High      | High      | High      | High      | High      | High      |
| 10.45 | 3 | 0 High      | High      | High      | High      | High      | High      |
| 10.43 | 3 | 0 High      | High      | High      | High      | High      | High      |
| 10.39 | 2 | 0 High      | High      | High      | High      | High      | High      |
| 10.37 | 2 | 0 High      | High      | High      | High      | High      | High      |
| 10.31 | 4 | 1 High      | High      | High      | High      | High      | High      |
| 10.3  | 5 | 3 High      | High      | High      | High      | High      | High      |
| 10.27 | 3 | 0 High      | High      | High      | High      | High      | High      |
| 10.22 | 3 | 0 High      | High      | High      | High      | High      | High      |
| 10.21 | 3 | 0 High      | High      | High      | High      | High      | High      |
| 10.2  | 4 | 1 High      | High      | High      | High      | High      | High      |
| 10.19 | 2 | 0 High      | High      | High      | High      | High      | High      |
| 10.15 | 3 | 1 High      | High      | High      | High      | High      | High      |
| 10.12 | 4 | 0 High      | High      | High      | High      | High      | High      |
| 10.08 | 1 | 0 High      | High      | High      | High      | High      | High      |
| 10.07 | 3 | 0 High      | High      | High      | High      | High      | High      |
| 10.07 | 3 | 2 High      | High      | High      | High      | High      | High      |
| 10.06 | 2 | 0 High      | High      | High      | High      | High      | High      |
| 10.06 | 3 | 1 High      | High      | High      | High      | High      | High      |
| 10.06 | 4 | 0 High      | High      | High      | High      | High      | High      |
| 10.03 | 3 | 1 High      | High      | High      | High      | High      | High      |
| 10.02 | 2 | 0 High      | High      | High      | High      | High      | High      |
| 10.01 | 2 | 0 High      | High      | High      | High      | High      | High      |
| 10.01 | 4 | 0 High      | High      | High      | High      | High      | High      |
| 9.99  | 2 | 0 High      | High      | High      | High      | High      | High      |
| 9.99  | 2 | 0 High      | High      | High      | High      | High      | High      |
| 9.98  | 2 | 0 High      | High      | High      | High      | High      | High      |
| 9.97  | 2 | 0 High      | High      | High      | High      | High      | High      |
| 9.96  | 3 | 0 High      | High      | High      | High      | High      | High      |
| 9.95  | 3 | 1 High      | High      | High      | High      | High      | High      |
| 9.95  | 2 | 0 High      | High      | High      | High      | High      | High      |
| 9.93  | 3 | 1 High      | High      | High      | High      | High      | High      |
| 9.92  | 3 | 0 High      | High      | High      | High      | High      | High      |
| 9.9   | 4 | 0 High      | High      | High      | High      | High      | High      |
| 9.9   | 3 | 0 High      | High      | High      | High      | High      | High      |
| 9.88  | 4 | 2 High      | High      | High      | High      | High      | High      |
| 9.88  | 2 | 0 High      | High      | High      | High      | High      | High      |
| 9.87  | 3 | 0 High      | High      | High      | High      | High      | High      |
| 9.86  | 3 | 1 Not Found | Not Found |
| 9.83  | 3 | 0 High      | High      | High      | High      | High      | High      |
| 9.78  | 5 | 0 High      | High      | High      | High      | High      | High      |
| 9.77  | 2 | 2 Not Found | Not Found |
| 9.75  | 4 | 0 High      | High      | High      | High      | High      | High      |
| 9.72  | 2 | 0 High      | High      | High      | High      | High      | High      |
| 9.69  | 3 | 0 High      | High      | High      | High      | High      | High      |
| 9.69  | 4 | 0 High      | High      | High      | High      | High      | High      |
| 9.69  | 3 | 0 High      | High      | High      | High      | High      | High      |
| 9.66  | 3 | 0 High      | High      | High      | High      | High      | High      |
| 9.64  | 2 | 1 High      | High      | High      | High      | High      | High      |
| 9.63  | 3 | 0 High      | High      | High      | High      | High      | High      |
| 9.63  | 3 | 1 High      | High      | High      | High      | High      | High      |

|      |   |             |           |           |           |           |           |
|------|---|-------------|-----------|-----------|-----------|-----------|-----------|
| 9.61 | 2 | 0 High      | High      | High      | High      | High      | High      |
| 9.61 | 2 | 0 High      | High      | High      | High      | High      | High      |
| 9.6  | 2 | 0 High      | High      | High      | High      | High      | High      |
| 9.57 | 3 | 0 High      | High      | High      | High      | High      | High      |
| 9.54 | 2 | 1 High      | High      | High      | High      | High      | High      |
| 9.53 | 3 | 0 High      | High      | High      | High      | High      | High      |
| 9.52 | 3 | 2 High      | High      | High      | High      | High      | High      |
| 9.5  | 2 | 0 High      | High      | High      | High      | High      | High      |
| 9.49 | 3 | 0 High      | High      | High      | High      | High      | High      |
| 9.49 | 2 | 0 High      | High      | High      | High      | High      | High      |
| 9.48 | 3 | 2 High      | High      | High      | High      | High      | High      |
| 9.47 | 2 | 0 High      | High      | High      | High      | High      | High      |
| 9.46 | 2 | 0 High      | High      | High      | High      | High      | High      |
| 9.44 | 5 | 0 High      | High      | High      | High      | High      | High      |
| 9.44 | 1 | 0 High      | High      | High      | High      | High      | High      |
| 9.42 | 2 | 0 High      | High      | High      | High      | High      | High      |
| 9.4  | 3 | 0 High      | High      | High      | High      | High      | High      |
| 9.39 | 2 | 0 High      | High      | High      | High      | High      | High      |
| 9.38 | 3 | 0 High      | High      | High      | High      | High      | High      |
| 9.38 | 3 | 0 High      | High      | High      | High      | High      | High      |
| 9.36 | 2 | 1 High      | High      | High      | High      | High      | High      |
| 9.35 | 4 | 1 High      | High      | High      | High      | High      | High      |
| 9.34 | 2 | 0 High      | High      | High      | High      | High      | High      |
| 9.34 | 2 | 0 High      | High      | High      | High      | High      | High      |
| 9.3  | 3 | 0 High      | High      | High      | High      | High      | High      |
| 9.29 | 3 | 0 High      | High      | High      | High      | High      | High      |
| 9.29 | 2 | 0 High      | High      | High      | High      | High      | High      |
| 9.21 | 2 | 0 High      | High      | High      | High      | High      | High      |
| 9.19 | 3 | 0 High      | High      | High      | High      | High      | High      |
| 9.19 | 2 | 0 High      | High      | High      | High      | High      | High      |
| 9.19 | 2 | 0 High      | High      | High      | High      | High      | High      |
| 9.18 | 3 | 0 High      | High      | High      | High      | High      | High      |
| 9.18 | 2 | 0 High      | High      | High      | High      | High      | High      |
| 9.17 | 3 | 0 High      | High      | High      | High      | High      | High      |
| 9.17 | 2 | 0 High      | High      | High      | High      | High      | High      |
| 9.16 | 2 | 0 High      | High      | High      | High      | High      | High      |
| 9.15 | 2 | 0 High      | High      | High      | High      | High      | High      |
| 9.12 | 2 | 1 High      | High      | High      | High      | High      | High      |
| 9.1  | 2 | 0 High      | High      | High      | High      | High      | High      |
| 9.08 | 2 | 0 High      | High      | High      | High      | High      | High      |
| 9.08 | 2 | 0 Not Found | Not Found |
| 9.05 | 3 | 0 High      | High      | High      | High      | High      | High      |
| 9.03 | 4 | 0 High      | High      | High      | High      | High      | High      |
| 9.02 | 3 | 1 High      | High      | High      | High      | High      | High      |
| 9    | 3 | 0 High      | High      | High      | High      | High      | High      |
| 9    | 2 | 0 High      | High      | High      | High      | High      | High      |
| 8.99 | 2 | 0 High      | High      | High      | High      | High      | High      |
| 8.98 | 2 | 0 High      | High      | High      | High      | High      | High      |
| 8.98 | 3 | 0 High      | High      | High      | High      | High      | High      |
| 8.97 | 2 | 0 High      | High      | High      | High      | High      | High      |
| 8.97 | 2 | 0 High      | High      | High      | High      | High      | High      |

|      |   |             |           |           |           |           |           |
|------|---|-------------|-----------|-----------|-----------|-----------|-----------|
| 8.97 | 3 | 0 High      | High      | High      | High      | High      | High      |
| 8.96 | 3 | 0 High      | High      | High      | High      | High      | High      |
| 8.94 | 2 | 0 High      | High      | High      | High      | High      | High      |
| 8.93 | 2 | 0 High      | High      | High      | High      | High      | High      |
| 8.89 | 2 | 0 High      | High      | High      | High      | High      | High      |
| 8.86 | 4 | 0 High      | High      | High      | High      | High      | High      |
| 8.83 | 3 | 0 High      | High      | High      | High      | High      | High      |
| 8.81 | 4 | 0 High      | High      | High      | High      | High      | High      |
| 8.81 | 2 | 0 High      | High      | High      | High      | High      | High      |
| 8.8  | 3 | 0 High      | High      | High      | High      | High      | High      |
| 8.79 | 2 | 0 High      | High      | High      | High      | High      | High      |
| 8.79 | 2 | 0 High      | High      | High      | High      | High      | High      |
| 8.79 | 3 | 0 High      | High      | High      | High      | High      | High      |
| 8.79 | 2 | 0 Not Found | Not Found |
| 8.77 | 2 | 0 High      | High      | High      | High      | High      | High      |
| 8.68 | 2 | 0 High      | High      | High      | High      | High      | High      |
| 8.68 | 3 | 0 High      | High      | High      | High      | High      | High      |
| 8.67 | 3 | 0 High      | High      | High      | High      | High      | High      |
| 8.65 | 1 | 0 High      | High      | High      | High      | High      | High      |
| 8.65 | 3 | 2 Not Found | Not Found |
| 8.64 | 3 | 0 High      | High      | High      | High      | High      | High      |
| 8.64 | 2 | 0 High      | High      | High      | High      | High      | High      |
| 8.61 | 1 | 0 High      | High      | High      | High      | High      | High      |
| 8.61 | 2 | 0 High      | High      | High      | High      | High      | High      |
| 8.58 | 3 | 0 High      | High      | High      | High      | High      | High      |
| 8.58 | 3 | 0 High      | High      | High      | High      | High      | High      |
| 8.58 | 2 | 0 High      | High      | High      | High      | High      | High      |
| 8.58 | 2 | 0 High      | High      | High      | High      | High      | High      |
| 8.57 | 3 | 0 High      | High      | High      | High      | High      | High      |
| 8.57 | 3 | 0 High      | High      | High      | High      | High      | High      |
| 8.55 | 3 | 0 High      | High      | High      | High      | High      | High      |
| 8.54 | 2 | 0 High      | High      | High      | High      | High      | High      |
| 8.54 | 2 | 0 High      | High      | High      | High      | High      | High      |
| 8.53 | 3 | 0 High      | High      | High      | High      | High      | High      |
| 8.52 | 2 | 0 High      | High      | High      | High      | High      | High      |
| 8.51 | 3 | 0 High      | High      | High      | High      | High      | High      |
| 8.49 | 3 | 0 High      | High      | High      | High      | High      | High      |
| 8.45 | 2 | 1 High      | High      | High      | High      | High      | High      |
| 8.43 | 3 | 0 High      | High      | High      | High      | High      | High      |
| 8.42 | 3 | 1 High      | High      | High      | High      | High      | High      |
| 8.39 | 3 | 0 High      | High      | High      | High      | High      | High      |
| 8.37 | 3 | 0 High      | High      | High      | High      | High      | High      |
| 8.37 | 3 | 0 High      | High      | High      | High      | High      | High      |
| 8.37 | 2 | 0 High      | High      | High      | High      | High      | High      |
| 8.35 | 3 | 0 High      | High      | High      | High      | High      | High      |
| 8.35 | 2 | 0 High      | High      | High      | High      | High      | High      |
| 8.32 | 3 | 0 High      | High      | High      | High      | High      | High      |
| 8.31 | 3 | 0 High      | High      | High      | High      | High      | High      |
| 8.3  | 2 | 0 High      | High      | High      | High      | High      | High      |
| 8.29 | 2 | 0 High      | High      | High      | High      | High      | High      |
| 8.27 | 2 | 0 High      | High      | High      | High      | High      | High      |

|      |   |        |      |      |      |      |      |
|------|---|--------|------|------|------|------|------|
| 8.26 | 2 | 0 High | High | High | High | High | High |
| 8.26 | 2 | 0 High | High | High | High | High | High |
| 8.26 | 2 | 0 High | High | High | High | High | High |
| 8.25 | 2 | 0 High | High | High | High | High | High |
| 8.24 | 3 | 0 High | High | High | High | High | High |
| 8.22 | 2 | 0 High | High | High | High | High | High |
| 8.22 | 1 | 0 High | High | High | High | High | High |
| 8.2  | 1 | 0 High | High | High | High | High | High |
| 8.2  | 3 | 0 High | High | High | High | High | High |
| 8.17 | 2 | 0 High | High | High | High | High | High |
| 8.16 | 3 | 0 High | High | High | High | High | High |
| 8.15 | 3 | 0 High | High | High | High | High | High |
| 8.13 | 3 | 0 High | High | High | High | High | High |
| 8.11 | 3 | 0 High | High | High | High | High | High |
| 8.11 | 3 | 0 High | High | High | High | High | High |
| 8.1  | 4 | 0 High | High | High | High | High | High |
| 8.1  | 4 | 0 High | High | High | High | High | High |
| 8.09 | 3 | 0 High | High | High | High | High | High |
| 8.08 | 2 | 0 High | High | High | High | High | High |
| 8.08 | 2 | 0 High | High | High | High | High | High |
| 8.07 | 2 | 0 High | High | High | High | High | High |
| 8.07 | 4 | 0 High | High | High | High | High | High |
| 8.07 | 2 | 0 High | High | High | High | High | High |
| 8.05 | 3 | 0 High | High | High | High | High | High |
| 8.04 | 2 | 0 High | High | High | High | High | High |
| 8.04 | 3 | 0 High | High | High | High | High | High |
| 8.02 | 3 | 0 High | High | High | High | High | High |
| 8.02 | 5 | 0 High | High | High | High | High | High |
| 7.98 | 2 | 0 High | High | High | High | High | High |
| 7.97 | 2 | 0 High | High | High | High | High | High |
| 7.97 | 2 | 0 High | High | High | High | High | High |
| 7.96 | 3 | 0 High | High | High | High | High | High |
| 7.93 | 3 | 1 High | High | High | High | High | High |
| 7.93 | 3 | 0 High | High | High | High | High | High |
| 7.93 | 2 | 0 High | High | High | High | High | High |
| 7.92 | 3 | 1 High | High | High | High | High | High |
| 7.92 | 2 | 0 High | High | High | High | High | High |
| 7.92 | 3 | 0 High | High | High | High | High | High |
| 7.91 | 3 | 0 High | High | High | High | High | High |
| 7.9  | 2 | 0 High | High | High | High | High | High |
| 7.9  | 3 | 0 High | High | High | High | High | High |
| 7.89 | 2 | 0 High | High | High | High | High | High |
| 7.88 | 2 | 0 High | High | High | High | High | High |
| 7.87 | 3 | 0 High | High | High | High | High | High |
| 7.84 | 4 | 0 High | High | High | High | High | High |
| 7.83 | 3 | 0 High | High | High | High | High | High |
| 7.82 | 3 | 0 High | High | High | High | High | High |
| 7.82 | 1 | 0 High | High | High | High | High | High |
| 7.81 | 2 | 0 High | High | High | High | High | High |
| 7.81 | 3 | 0 High | High | High | High | High | High |
| 7.81 | 2 | 0 High | High | High | High | High | High |

|      |   |             |           |           |           |           |           |
|------|---|-------------|-----------|-----------|-----------|-----------|-----------|
| 7.79 | 1 | 0 High      | High      | High      | High      | High      | High      |
| 7.79 | 2 | 0 High      | High      | High      | High      | High      | High      |
| 7.76 | 2 | 0 High      | High      | High      | High      | High      | High      |
| 7.76 | 3 | 0 High      | High      | High      | High      | High      | High      |
| 7.76 | 2 | 0 High      | High      | High      | High      | High      | High      |
| 7.75 | 2 | 1 Not Found | Not Found |
| 7.74 | 2 | 0 High      | High      | High      | High      | High      | High      |
| 7.73 | 3 | 0 High      | High      | High      | High      | High      | High      |
| 7.71 | 3 | 0 High      | High      | High      | High      | High      | High      |
| 7.71 | 3 | 0 High      | High      | High      | High      | High      | High      |
| 7.66 | 3 | 0 High      | High      | High      | High      | High      | High      |
| 7.66 | 4 | 0 High      | High      | High      | High      | High      | High      |
| 7.66 | 2 | 0 High      | High      | High      | High      | High      | High      |
| 7.64 | 2 | 0 High      | High      | High      | High      | High      | High      |
| 7.64 | 3 | 0 High      | High      | High      | High      | High      | High      |
| 7.62 | 3 | 0 High      | High      | High      | High      | High      | High      |
| 7.59 | 2 | 0 High      | High      | High      | High      | High      | High      |
| 7.57 | 2 | 0 High      | High      | High      | High      | High      | High      |
| 7.57 | 3 | 0 High      | High      | High      | High      | High      | High      |
| 7.56 | 2 | 0 High      | High      | High      | High      | High      | High      |
| 7.55 | 2 | 0 High      | High      | High      | High      | High      | High      |
| 7.55 | 3 | 0 High      | High      | High      | High      | High      | High      |
| 7.55 | 3 | 0 High      | High      | High      | High      | High      | High      |
| 7.55 | 3 | 0 High      | High      | High      | High      | High      | High      |
| 7.55 | 2 | 0 High      | High      | High      | High      | High      | High      |
| 7.54 | 3 | 0 High      | High      | High      | High      | High      | High      |
| 7.53 | 1 | 0 High      | High      | High      | High      | High      | High      |
| 7.51 | 2 | 0 High      | High      | High      | High      | High      | High      |
| 7.5  | 1 | 0 High      | High      | High      | High      | High      | High      |
| 7.49 | 3 | 0 High      | High      | High      | High      | High      | High      |
| 7.48 | 4 | 0 High      | High      | High      | High      | High      | High      |
| 7.46 | 3 | 0 High      | High      | High      | High      | High      | High      |
| 7.46 | 1 | 0 High      | High      | High      | High      | High      | High      |
| 7.46 | 2 | 0 High      | High      | High      | High      | High      | High      |
| 7.46 | 2 | 0 High      | High      | High      | High      | High      | High      |
| 7.43 | 2 | 0 High      | High      | High      | High      | High      | High      |
| 7.43 | 2 | 0 High      | High      | High      | High      | High      | High      |
| 7.42 | 2 | 0 High      | High      | High      | High      | High      | High      |
| 7.41 | 2 | 0 High      | High      | High      | High      | High      | High      |
| 7.4  | 2 | 0 High      | High      | High      | High      | High      | High      |
| 7.38 | 2 | 0 High      | High      | High      | High      | High      | High      |
| 7.37 | 3 | 0 High      | High      | High      | High      | High      | High      |
| 7.36 | 2 | 1 High      | High      | High      | High      | High      | High      |
| 7.35 | 3 | 0 High      | High      | High      | High      | High      | High      |
| 7.35 | 4 | 0 High      | High      | High      | High      | High      | High      |
| 7.35 | 2 | 0 High      | High      | High      | High      | High      | High      |
| 7.31 | 3 | 0 High      | High      | High      | High      | High      | High      |
| 7.31 | 2 | 0 High      | High      | High      | High      | High      | High      |
| 7.3  | 2 | 0 High      | High      | High      | High      | High      | High      |
| 7.29 | 3 | 1 High      | High      | High      | High      | High      | High      |
| 7.28 | 2 | 0 High      | High      | High      | High      | High      | High      |





|      |   |             |           |           |           |           |           |
|------|---|-------------|-----------|-----------|-----------|-----------|-----------|
| 6.64 | 2 | 0 High      | High      | High      | High      | High      | High      |
| 6.63 | 2 | 0 High      | High      | High      | High      | High      | High      |
| 6.59 | 3 | 0 High      | High      | High      | High      | High      | High      |
| 6.58 | 2 | 0 High      | High      | High      | High      | High      | High      |
| 6.57 | 1 | 0 High      | High      | High      | High      | High      | High      |
| 6.52 | 2 | 0 High      | High      | High      | High      | High      | High      |
| 6.52 | 4 | 0 High      | High      | High      | High      | High      | High      |
| 6.49 | 1 | 0 High      | High      | High      | High      | High      | High      |
| 6.49 | 2 | 0 High      | High      | High      | High      | High      | High      |
| 6.48 | 2 | 0 High      | High      | High      | High      | High      | High      |
| 6.48 | 3 | 0 High      | High      | High      | High      | High      | High      |
| 6.47 | 2 | 0 High      | High      | High      | High      | High      | High      |
| 6.47 | 2 | 0 High      | High      | High      | High      | High      | High      |
| 6.46 | 2 | 0 High      | High      | High      | High      | High      | High      |
| 6.45 | 1 | 0 High      | High      | High      | High      | High      | High      |
| 6.44 | 2 | 0 High      | High      | High      | High      | High      | High      |
| 6.43 | 2 | 0 High      | High      | High      | High      | High      | High      |
| 6.43 | 2 | 0 High      | High      | High      | High      | High      | High      |
| 6.42 | 2 | 0 High      | High      | High      | High      | High      | High      |
| 6.41 | 2 | 0 High      | High      | High      | High      | High      | High      |
| 6.4  | 2 | 0 High      | High      | High      | High      | High      | High      |
| 6.4  | 2 | 0 High      | High      | High      | High      | High      | High      |
| 6.4  | 2 | 0 High      | High      | High      | High      | High      | High      |
| 6.35 | 2 | 0 High      | High      | High      | High      | High      | High      |
| 6.31 | 1 | 0 High      | High      | High      | High      | High      | High      |
| 6.31 | 2 | 0 High      | High      | High      | High      | High      | High      |
| 6.31 | 2 | 0 High      | High      | High      | High      | High      | High      |
| 6.3  | 2 | 0 High      | High      | High      | High      | High      | High      |
| 6.29 | 2 | 0 High      | High      | High      | High      | High      | High      |
| 6.29 | 3 | 0 High      | High      | High      | High      | High      | High      |
| 6.28 | 1 | 0 High      | High      | High      | High      | High      | High      |
| 6.27 | 2 | 0 High      | High      | High      | High      | High      | High      |
| 6.24 | 2 | 0 High      | High      | High      | High      | High      | High      |
| 6.23 | 3 | 1 High      | High      | High      | High      | High      | High      |
| 6.21 | 2 | 0 High      | High      | High      | High      | High      | High      |
| 6.2  | 1 | 0 High      | High      | High      | High      | High      | High      |
| 6.2  | 1 | 0 High      | High      | High      | High      | High      | High      |
| 6.19 | 2 | 0 High      | High      | High      | High      | High      | High      |
| 6.18 | 2 | 0 High      | High      | High      | High      | High      | High      |
| 6.18 | 2 | 1 Not Found | Not Found |
| 6.18 | 1 | 0 High      | High      | High      | High      | High      | High      |
| 6.18 | 2 | 0 High      | High      | High      | High      | High      | High      |
| 6.17 | 2 | 0 High      | High      | High      | High      | High      | High      |
| 6.17 | 2 | 0 High      | High      | High      | High      | High      | High      |
| 6.17 | 2 | 0 High      | High      | High      | High      | High      | High      |
| 6.16 | 3 | 1 High      | High      | High      | High      | High      | High      |
| 6.16 | 3 | 0 High      | High      | High      | High      | High      | High      |
| 6.15 | 2 | 0 High      | High      | High      | High      | High      | High      |
| 6.15 | 2 | 0 High      | High      | High      | High      | High      | High      |
| 6.14 | 3 | 0 High      | High      | High      | High      | High      | High      |
| 6.1  | 2 | 0 High      | High      | High      | High      | High      | High      |



|      |   |        |      |      |      |      |      |
|------|---|--------|------|------|------|------|------|
| 5.66 | 2 | 0 High | High | High | High | High | High |
| 5.65 | 4 | 0 High | High | High | High | High | High |
| 5.64 | 2 | 0 High | High | High | High | High | High |
| 5.64 | 2 | 0 High | High | High | High | High | High |
| 5.63 | 1 | 0 High | High | High | High | High | High |
| 5.63 | 1 | 0 High | High | High | High | High | High |
| 5.61 | 2 | 0 High | High | High | High | High | High |
| 5.61 | 1 | 0 High | High | High | High | High | High |
| 5.61 | 3 | 0 High | High | High | High | High | High |
| 5.58 | 2 | 0 High | High | High | High | High | High |
| 5.55 | 2 | 0 High | High | High | High | High | High |
| 5.54 | 2 | 0 High | High | High | High | High | High |
| 5.54 | 3 | 0 High | High | High | High | High | High |
| 5.54 | 2 | 0 High | High | High | High | High | High |
| 5.54 | 2 | 0 High | High | High | High | High | High |
| 5.53 | 2 | 1 High | High | High | High | High | High |
| 5.51 | 2 | 0 High | High | High | High | High | High |
| 5.51 | 1 | 0 High | High | High | High | High | High |
| 5.5  | 2 | 0 High | High | High | High | High | High |
| 5.5  | 2 | 0 High | High | High | High | High | High |
| 5.49 | 1 | 0 High | High | High | High | High | High |
| 5.48 | 3 | 0 High | High | High | High | High | High |
| 5.47 | 1 | 0 High | High | High | High | High | High |
| 5.47 | 2 | 0 High | High | High | High | High | High |
| 5.47 | 2 | 0 High | High | High | High | High | High |
| 5.47 | 2 | 0 High | High | High | High | High | High |
| 5.47 | 2 | 0 High | High | High | High | High | High |
| 5.46 | 2 | 0 High | High | High | High | High | High |
| 5.46 | 2 | 0 High | High | High | High | High | High |
| 5.45 | 2 | 0 High | High | High | High | High | High |
| 5.45 | 2 | 0 High | High | High | High | High | High |
| 5.44 | 2 | 0 High | High | High | High | High | High |
| 5.44 | 2 | 0 High | High | High | High | High | High |
| 5.44 | 1 | 0 High | High | High | High | High | High |
| 5.44 | 2 | 0 High | High | High | High | High | High |
| 5.43 | 2 | 0 High | High | High | High | High | High |
| 5.43 | 1 | 0 High | High | High | High | High | High |
| 5.42 | 2 | 0 High | High | High | High | High | High |
| 5.42 | 1 | 0 High | High | High | High | High | High |
| 5.41 | 2 | 0 High | High | High | High | High | High |
| 5.38 | 2 | 0 High | High | High | High | High | High |
| 5.37 | 2 | 0 High | High | High | High | High | High |
| 5.34 | 1 | 0 High | High | High | High | High | High |
| 5.34 | 2 | 0 High | High | High | High | High | High |
| 5.33 | 3 | 0 High | High | High | High | High | High |
| 5.31 | 2 | 0 High | High | High | High | High | High |
| 5.3  | 2 | 0 High | High | High | High | High | High |
| 5.28 | 2 | 0 High | High | High | High | High | High |
| 5.28 | 2 | 0 High | High | High | High | High | High |
| 5.27 | 3 | 1 High | High | High | High | High | High |
| 5.27 | 1 | 0 High | High | High | High | High | High |



































| # | Protein | control_wcase_hu | ncase_hou | control_wcontrol_q | case_shu | Group_cas | Group_cas |   |
|---|---------|------------------|-----------|--------------------|----------|-----------|-----------|---|
| 1 | 126.8   | 85.5             | 77.4      | 118.3              | 120.3    | 71.8      | 78.23333  | 1 |
| 1 | 173.4   | 91.7             | 60.7      | 93.7               | 121.3    | 59.2      | 70.53333  | 1 |
| 1 | NA      | NA               | NA        | NA                 | NA       | NA        | NA        | 0 |
| 1 | 127.8   | 149.8            | 65.6      | 69.8               | 135      | 51.9      | 89.1      | 1 |
| 1 | 117.6   | 145.9            | 53.1      | 36                 | 210.3    | 37        | 78.66667  | 1 |
| 1 | 94      | 110.4            | 95        | 116.9              | 60.5     | 123.4     | 109.6     | 1 |
| 1 | 91.1    | 99.7             | 105.4     | 117                | 64.6     | 122.2     | 109.1     | 1 |
| 1 | 93.1    | 105.8            | 76.6      | 100                | 157.6    | 67        | 83.13333  | 1 |
| 1 | 96.3    | 107.8            | 72.1      | 98.6               | 154.3    | 71        | 83.63333  | 1 |
| 1 | 145.4   | 95.9             | 71.7      | 98.3               | 108      | 80.8      | 82.8      | 1 |
| 1 | 118.6   | 125.3            | 64.9      | 94.1               | 97.2     | 99.9      | 96.7      | 1 |
| 1 | 119.7   | 91.3             | 114.5     | 78.6               | 108.2    | 87.7      | 97.83333  | 1 |
| 1 | 152.6   | 100.7            | 77.9      | 80.5               | 104.5    | 83.8      | 87.46667  | 1 |
| 1 | 69.7    | 69.8             | 101.8     | 120.1              | 77.1     | 161.4     | 111       | 1 |
| 1 | 132.3   | 178.3            | 63.9      | 55                 | 89.5     | 81.1      | 107.7667  | 1 |
| 1 | 70.4    | 59.2             | 106.3     | 120.6              | 66.1     | 177.4     | 114.3     | 1 |
| 1 | 79.8    | 111.2            | 78.5      | 99.6               | 130.1    | 100.9     | 96.86667  | 1 |
| 1 | 83.7    | 79.4             | 127.8     | 123.8              | 75.2     | 110.1     | 105.7667  | 1 |
| 1 | 66.6    | 99.1             | 125.9     | 92                 | 85.1     | 131.3     | 118.7667  | 1 |
| 1 | 89.1    | 87.4             | 109.3     | 97.6               | 120.4    | 96.2      | 97.63333  | 1 |
| 1 | NA      | NA               | NA        | NA                 | NA       | NA        | NA        | 0 |
| 1 | 110.9   | 90.2             | 83.3      | 122.3              | 86.5     | 106.7     | 93.4      | 1 |
| 1 | 94.2    | 85.8             | 95.9      | 88                 | 159.6    | 76.5      | 86.06667  | 1 |
| 1 | 113.3   | 104.6            | 86        | 98.9               | 98.1     | 99        | 96.53333  | 1 |
| 1 | 145.6   | 141.5            | 64.6      | 70                 | 122.2    | 56.1      | 87.4      | 1 |
| 1 | 120.5   | 130              | 63        | 87.4               | 102.3    | 96.9      | 96.63333  | 1 |
| 1 | 243.6   | 110.5            | 56.7      | 48.2               | 100.3    | 40.7      | 69.3      | 1 |
| 1 | 54.9    | 55.4             | 279.7     | 83                 | 61.2     | 65.8      | 133.6333  | 1 |
| 1 | 72.6    | 119.2            | 97.7      | 98                 | 121      | 91.5      | 102.8     | 1 |
| 1 | 116.9   | 127              | 63.6      | 93.1               | 102.2    | 97.1      | 95.9      | 1 |
| 1 | 95.9    | 97.9             | 89.9      | 104.5              | 99.5     | 112.3     | 100.0333  | 1 |
| 1 | 93.7    | 165.7            | 104.6     | 56.5               | 95.1     | 84.3      | 118.2     | 1 |
| 1 | 95.6    | 150.6            | 71        | 79.6               | 143.4    | 59.9      | 93.83333  | 1 |
| 1 | 80.1    | 106.1            | 111.2     | 129.2              | 67.9     | 105.4     | 107.5667  | 1 |
| 1 | 96.1    | 104.4            | 115.4     | 101.1              | 84.4     | 98.6      | 106.1333  | 1 |
| 1 | 115.6   | 106.7            | 91.4      | 103.7              | 107.7    | 74.9      | 91        | 1 |
| 1 | 72      | 114.4            | 97.3      | 90.8               | 149.5    | 75.9      | 95.86667  | 1 |
| 1 | 164.7   | 133.5            | 52        | 61.8               | 139.7    | 48.3      | 77.93333  | 1 |
| 1 | 74.8    | 94.6             | 85.4      | 102.2              | 158.4    | 84.5      | 88.16667  | 1 |
| 1 | 79.2    | 83.3             | 86.5      | 114.3              | 138.5    | 98.2      | 89.33333  | 1 |
| 1 | 120.9   | 142.5            | 57.1      | 83.1               | 101.8    | 94.4      | 98        | 1 |
| 1 | 98      | 79.4             | 95.4      | 146.7              | 98.2     | 82.3      | 85.7      | 1 |
| 1 | 88.4    | 77.1             | 140.9     | 94                 | 63.4     | 136.3     | 118.1     | 1 |
| 1 | 69      | 89.7             | 126.4     | 117.9              | 79.2     | 117.9     | 111.3333  | 1 |
| 1 | 64.3    | 53.6             | 158.9     | 100.6              | 56.9     | 165.6     | 126.0333  | 1 |
| 1 | 86.5    | 86.9             | 98.2      | 120.5              | 103.8    | 104.1     | 96.4      | 1 |
| 1 | 114.2   | 133              | 88.9      | 93.3               | 99.2     | 71.4      | 97.76667  | 1 |
| 1 | 94.1    | 81.3             | 86.8      | 117.5              | 102.4    | 117.9     | 95.33333  | 1 |
| 1 | 72.4    | 79.8             | 144.7     | 122.8              | 123.3    | 57        | 93.83333  | 1 |
| 1 | 87.9    | 81.6             | 87.2      | 158.7              | 79       | 105.5     | 91.43333  | 1 |

|   |       |       |       |       |       |       |          |   |
|---|-------|-------|-------|-------|-------|-------|----------|---|
| 1 | 61.4  | 54.3  | 99.9  | 175.8 | 56.4  | 152.1 | 102.1    | 1 |
| 1 | 112.4 | 174.3 | 63.4  | 63.8  | 136.7 | 49.4  | 95.7     | 1 |
| 1 | 79.8  | 143.5 | 85.6  | 72.8  | 162.7 | 55.6  | 94.9     | 1 |
| 1 | 71.9  | 114.8 | 103.9 | 107.6 | 120.4 | 81.3  | 100      | 1 |
| 1 | 46.5  | 91    | 117.6 | 177.6 | 72.5  | 94.8  | 101.1333 | 1 |
| 1 | 140.7 | 138.9 | 83.6  | 73.5  | 104.8 | 58.4  | 93.63333 | 1 |
| 1 | 60.1  | 52.5  | 160   | 100.8 | 52    | 174.6 | 129.0333 | 1 |
| 1 | 73.7  | 91.5  | 117.3 | 118   | 86.6  | 112.9 | 107.2333 | 1 |
| 1 | 74.7  | 92.9  | 116.6 | 134   | 63.5  | 118.3 | 109.2667 | 1 |
| 1 | 78.4  | 73.8  | 100.4 | 112.1 | 81.3  | 154.1 | 109.4333 | 1 |
| 1 | 63.2  | 57.3  | 95.6  | 150.5 | 61    | 172.4 | 108.4333 | 1 |
| 1 | 69.4  | 86.6  | 83.2  | 130.2 | 85.7  | 145   | 104.9333 | 1 |
| 1 | 67    | 69    | 122.2 | 135.5 | 78.7  | 127.6 | 106.2667 | 1 |
| 1 | NA       | 0 |
| 1 | 76.6  | 75.8  | 122.3 | 128.1 | 76.4  | 120.7 | 106.2667 | 1 |
| 1 | NA       | 0 |
| 1 | 59.1  | 50.3  | 165.6 | 103   | 51.4  | 170.6 | 128.8333 | 1 |
| 1 | NA       | 0 |
| 1 | 121.5 | 107.2 | 78.8  | 95    | 104.6 | 92.9  | 92.96667 | 1 |
| 1 | 56.2  | 58.4  | 73.2  | 131.2 | 59.6  | 221.3 | 117.6333 | 1 |
| 1 | 62.3  | 65.5  | 75.3  | 111.4 | 64    | 221.5 | 120.7667 | 1 |
| 1 | 114.1 | 91.7  | 130.3 | 81.8  | 112.5 | 69.6  | 97.2     | 1 |
| 1 | 53.4  | 43.1  | 74.3  | 267   | 54.2  | 108.1 | 75.16667 | 1 |
| 1 | 105.2 | 83.4  | 93.4  | 123.3 | 115.8 | 78.8  | 85.2     | 1 |
| 1 | 123.1 | 158.5 | 56.1  | 61.1  | 148.8 | 52.3  | 88.96667 | 1 |
| 1 | 112.1 | 224.7 | 36.5  | 40.8  | 151.7 | 34.3  | 98.5     | 1 |
| 1 | 85.4  | 127.5 | 72.2  | 93    | 148.5 | 73.4  | 91.03333 | 1 |
| 1 | 66.9  | 98.9  | 117.9 | 120.1 | 76.6  | 119.7 | 112.1667 | 1 |
| 1 | 31.7  | 27.1  | 206.4 | 93.2  | 31    | 210.5 | 148      | 1 |
| 1 | 58.9  | 55.6  | 223   | 80.9  | 66    | 115.5 | 131.3667 | 1 |
| 1 | 97    | 109.3 | 71.7  | 80.9  | 86.9  | 154.3 | 111.7667 | 1 |
| 1 | 115.6 | 104.8 | 92.4  | 80.5  | 139.1 | 67.5  | 88.23333 | 1 |
| 1 | 109.4 | 73.1  | 121.2 | 89    | 115.4 | 91.9  | 95.4     | 1 |
| 1 | 69.1  | 69.9  | 130.1 | 134.8 | 68.4  | 127.7 | 109.2333 | 1 |
| 1 | 86.5  | 109.5 | 102   | 110.4 | 102.6 | 89    | 100.1667 | 1 |
| 1 | 88.3  | 114.1 | 118.8 | 85.9  | 86.4  | 106.5 | 113.1333 | 1 |
| 1 | 71.3  | 76    | 107.2 | 109.6 | 73.5  | 162.4 | 115.2    | 1 |
| 1 | 111.5 | 91.8  | 98.8  | 110.3 | 110   | 77.7  | 89.43333 | 1 |
| 1 | 110.5 | 60.6  | 91.5  | 140.3 | 78.6  | 118.6 | 90.23333 | 1 |
| 1 | 75.7  | 100.7 | 123   | 104.2 | 94.1  | 102.4 | 108.7    | 1 |
| 1 | 98.2  | 132.1 | 79.1  | 100.9 | 70.1  | 119.6 | 110.2667 | 1 |
| 1 | 61.4  | 52.2  | 161   | 127.3 | 62.2  | 136   | 116.4    | 1 |
| 1 | 65.9  | 90.4  | 111.5 | 117.9 | 100.9 | 113.4 | 105.1    | 1 |
| 1 | 67    | 116.3 | 130.5 | 105.1 | 79.4  | 101.8 | 116.2    | 1 |
| 1 | 73.5  | 75.3  | 105.1 | 117.4 | 87.9  | 140.9 | 107.1    | 1 |
| 1 | 62    | 61.4  | 173.7 | 122.9 | 70.4  | 109.6 | 114.9    | 1 |
| 1 | 80.2  | 97.9  | 105.4 | 113.9 | 80.2  | 122.4 | 108.5667 | 1 |
| 1 | 63.7  | 64.6  | 124.2 | 113.7 | 76.5  | 157.3 | 115.3667 | 1 |
| 1 | 63.8  | 84.9  | 100.4 | 128.8 | 78.2  | 143.9 | 109.7333 | 1 |
| 1 | 84    | 77.2  | 143.5 | 127.9 | 90.5  | 76.8  | 99.16667 | 1 |
| 1 | 99.9  | 106.1 | 74    | 82.1  | 87.6  | 150.3 | 110.1333 | 1 |

|   |       |       |       |       |       |       |          |   |
|---|-------|-------|-------|-------|-------|-------|----------|---|
| 1 | 69.5  | 78.4  | 83.3  | 125   | 80.6  | 163.2 | 108.3    | 1 |
| 1 | 78.4  | 75.3  | 105   | 132.7 | 86.5  | 122.2 | 100.8333 | 1 |
| 1 | 82.2  | 99.7  | 109   | 94.2  | 122   | 93    | 100.5667 | 1 |
| 1 | 118.2 | 122.2 | 76.8  | 82.1  | 87    | 113.7 | 104.2333 | 1 |
| 1 | 128.5 | 126.6 | 55.1  | 53.1  | 141.6 | 95.1  | 92.26667 | 1 |
| 1 | 107.9 | 91.4  | 102.1 | 96.3  | 99.3  | 102.9 | 98.8     | 1 |
| 1 | 72.4  | 74.7  | 119.6 | 131.2 | 74.4  | 127.6 | 107.3    | 1 |
| 1 | 104.5 | 96.8  | 98.9  | 103.9 | 73.3  | 122.5 | 106.0667 | 1 |
| 1 | 99.3  | 90.9  | 94    | 102.5 | 89.1  | 124.3 | 103.0667 | 1 |
| 1 | 58.5  | 56.8  | 186.2 | 92.4  | 59.3  | 146.8 | 129.9333 | 1 |
| 1 | 61.5  | 58.5  | 169.9 | 117.6 | 73    | 119.5 | 115.9667 | 1 |
| 1 | 97.5  | 88    | 97.8  | 102.6 | 89.5  | 124.6 | 103.4667 | 1 |
| 1 | 61    | 94.6  | 114.7 | 161   | 75.3  | 93.4  | 100.9    | 1 |
| 1 | 87.5  | 94.1  | 100.9 | 100.2 | 81.6  | 135.7 | 110.2333 | 1 |
| 1 | 93.9  | 76.2  | 123.9 | 131.4 | 67    | 107.6 | 102.5667 | 1 |
| 1 | 89.3  | 89.3  | 107.9 | 138.5 | 74.6  | 100.5 | 99.23333 | 1 |
| 1 | 80.5  | 111.9 | 104   | 126   | 69.8  | 107.8 | 107.9    | 1 |
| 1 | 62.9  | 64.4  | 161.3 | 87.1  | 66.3  | 158   | 127.9    | 1 |
| 1 | 94.2  | 106.5 | 95.9  | 120.4 | 99.6  | 83.4  | 95.26667 | 1 |
| 1 | 77.4  | 105.2 | 109   | 110   | 93.6  | 104.7 | 106.3    | 1 |
| 1 | 109.2 | 92.7  | 162.1 | 69.8  | 79.1  | 87.2  | 114      | 1 |
| 1 | 91.5  | 90.8  | 99.7  | 105.1 | 108.5 | 104.4 | 98.3     | 1 |
| 1 | 76.8  | 68.1  | 135.3 | 93    | 66.2  | 160.6 | 121.3333 | 1 |
| 1 | 67.8  | 61.3  | 167.9 | 97.3  | 84.1  | 121.6 | 116.9333 | 1 |
| 1 | 121.8 | 106.7 | 85.6  | 99    | 96.4  | 90.6  | 94.3     | 1 |
| 1 | 122.9 | 117.6 | 92.8  | 90.1  | 82.1  | 94.5  | 101.6333 | 1 |
| 1 | 120.2 | 89.8  | 85.8  | 110   | 119.8 | 74.4  | 83.33333 | 1 |
| 1 | 83.3  | 80.2  | 103.1 | 112.6 | 83.2  | 137.7 | 107      | 1 |
| 1 | 78.8  | 92.2  | 110.8 | 102.5 | 81.6  | 134.1 | 112.3667 | 1 |
| 1 | 101.6 | 105.6 | 98.5  | 86.2  | 128.9 | 79.1  | 94.4     | 1 |
| 1 | 65.4  | 58.1  | 93.2  | 129.9 | 110.1 | 143.2 | 98.16667 | 1 |
| 1 | 124.4 | 129   | 68.5  | 67.6  | 107.6 | 102.9 | 100.1333 | 1 |
| 1 | 102.8 | 82.7  | 95.1  | 117.8 | 129.7 | 72    | 83.26667 | 1 |
| 1 | 122.8 | 113.7 | 116.6 | 76.9  | 85.1  | 84.8  | 105.0333 | 1 |
| 1 | 117.7 | 126   | 81.5  | 83.1  | 124.3 | 67.4  | 91.63333 | 1 |
| 1 | 120.8 | 120.4 | 78.4  | 77.6  | 83.8  | 119   | 105.9333 | 1 |
| 1 | 142.6 | 119.9 | 76.6  | 80.3  | 97    | 83.7  | 93.4     | 1 |
| 1 | 82.9  | 120.4 | 89.1  | 92.1  | 133.2 | 82.3  | 97.26667 | 1 |
| 1 | 84.6  | 91.9  | 106.9 | 97.8  | 104.1 | 114.7 | 104.5    | 1 |
| 1 | 119.5 | 104.4 | 74.8  | 106.6 | 109.1 | 85.5  | 88.23333 | 1 |
| 1 | 45.1  | 47.5  | 108.2 | 140.9 | 50.9  | 207.3 | 121      | 1 |
| 1 | 59.1  | 75.6  | 97.6  | 153.6 | 57.9  | 156.3 | 109.8333 | 1 |
| 1 | 123.3 | 200.8 | 74.5  | 63.3  | 83.5  | 54.7  | 110      | 1 |
| 1 | 216.4 | 118.4 | 57    | 49.8  | 103.3 | 55.2  | 76.86667 | 1 |
| 1 | 101.1 | 111.4 | 73    | 85    | 85.4  | 144.1 | 109.5    | 1 |
| 1 | 90    | 82.5  | 86.7  | 94.6  | 72    | 174.2 | 114.4667 | 1 |
| 1 | 84.9  | 107.2 | 100.6 | 103.3 | 105.5 | 98.5  | 102.1    | 1 |
| 1 | 103.5 | 148.2 | 87.2  | 84.5  | 113.3 | 63.2  | 99.53333 | 1 |
| 1 | 103.3 | 122   | 70.2  | 88.1  | 130.4 | 86.1  | 92.76667 | 1 |
| 1 | 105.9 | 106.8 | 88.9  | 91.6  | 124.7 | 82    | 92.56667 | 1 |
| 1 | 102.8 | 110.1 | 89.6  | 95.6  | 82.1  | 119.8 | 106.5    | 1 |

|   |       |       |       |       |       |       |          |   |
|---|-------|-------|-------|-------|-------|-------|----------|---|
| 1 | 104.8 | 98.6  | 84.5  | 99.3  | 118.9 | 93.9  | 92.33333 | 1 |
| 1 | 93.6  | 100.9 | 90    | 113.3 | 105.5 | 96.7  | 95.86667 | 1 |
| 1 | 70.1  | 70    | 112.7 | 108   | 79.9  | 159.3 | 114      | 1 |
| 1 | 69.1  | 47.7  | 146   | 103.7 | 162.9 | 70.6  | 88.1     | 1 |
| 1 | 85.7  | 90.2  | 145.2 | 87.3  | 82.7  | 109   | 114.8    | 1 |
| 1 | 128   | 109.7 | 81.6  | 85.1  | 122.6 | 73.1  | 88.13333 | 1 |
| 1 | 108.1 | 119   | 83.7  | 90.5  | 100.3 | 98.6  | 100.4333 | 1 |
| 1 | 80.4  | 78.8  | 110.3 | 92.8  | 79.6  | 158.1 | 115.7333 | 1 |
| 1 | 80.4  | 86.8  | 97.8  | 101.4 | 139.1 | 94.5  | 93.03333 | 1 |
| 1 | 60.2  | 54.4  | 199.6 | 100.1 | 74.1  | 111.7 | 121.9    | 1 |
| 1 | 69.5  | 63.2  | 170.1 | 111.7 | 91.2  | 94.3  | 109.2    | 1 |
| 1 | 67.7  | 72.9  | 143.2 | 125.3 | 75    | 115.8 | 110.6333 | 1 |
| 1 | 84.7  | 87.4  | 89.7  | 141.7 | 89.1  | 107.5 | 94.86667 | 1 |
| 1 | 235   | 115.7 | 57.7  | 68    | 68.7  | 54.8  | 76.06667 | 1 |
| 1 | 85.1  | 103.2 | 110.5 | 107.2 | 97.7  | 96.4  | 103.3667 | 1 |
| 1 | 131.8 | 78.8  | 88.4  | 121.5 | 101.4 | 78    | 81.73333 | 1 |
| 1 | 87.1  | 88.8  | 128.7 | 124.9 | 57.7  | 112.8 | 110.1    | 1 |
| 1 | 134.9 | 129.9 | 87.2  | 71.8  | 99.4  | 76.8  | 97.96667 | 1 |
| 1 | 140.4 | 126.5 | 98.2  | 71.5  | 77.5  | 85.9  | 103.5333 | 1 |
| 1 | 97.9  | 104.3 | 88.9  | 105   | 93.1  | 110.8 | 101.3333 | 1 |
| 1 | 81.6  | 81.9  | 138.3 | 121.2 | 81.1  | 95.8  | 105.3333 | 1 |
| 1 | 114.4 | 91.4  | 83.6  | 127.1 | 108.3 | 75.2  | 83.4     | 1 |
| 1 | 62.5  | 67.2  | 153.5 | 126.9 | 75.7  | 114.2 | 111.6333 | 1 |
| 1 | 114   | 104.4 | 81.6  | 88.4  | 130.4 | 81.2  | 89.06667 | 1 |
| 1 | 82.5  | 77.1  | 160.8 | 130.8 | 73.3  | 75.5  | 104.4667 | 1 |
| 1 | 74.2  | 57.8  | 130.5 | 121.6 | 70.9  | 145   | 111.1    | 1 |
| 1 | 59    | 288.3 | 50    | 60.8  | 46.2  | 95.7  | 144.6667 | 1 |
| 1 | 74.8  | 65    | 101.6 | 125.9 | 108.2 | 124.5 | 97.03333 | 1 |
| 1 | 99    | 91.3  | 92.1  | 100.5 | 78.8  | 138.3 | 107.2333 | 1 |
| 1 | 93    | 93.6  | 91.2  | 123.3 | 68.9  | 130.1 | 104.9667 | 1 |
| 1 | 79.7  | 76.6  | 83.5  | 136.4 | 79.6  | 144.2 | 101.4333 | 1 |
| 1 | 157.9 | 105.8 | 67.2  | 80    | 117.7 | 71.4  | 81.46667 | 1 |
| 1 | 73.2  | 68.2  | 143.9 | 96.1  | 87.8  | 130.8 | 114.3    | 1 |
| 1 | 104   | 151.6 | 75.6  | 86.1  | 109.1 | 73.5  | 100.2333 | 1 |
| 1 | 83.9  | 76.6  | 112.8 | 107.1 | 73.8  | 145.7 | 111.7    | 1 |
| 1 | 133.7 | 124.8 | 83.1  | 78    | 107.2 | 73.4  | 93.76667 | 1 |
| 1 | 75.2  | 114.6 | 148.9 | 71.4  | 87.4  | 102.5 | 122      | 1 |
| 1 | 86.1  | 91.7  | 85.8  | 88    | 135.3 | 113   | 96.83333 | 1 |
| 1 | 145.1 | 104   | 99.9  | 66.1  | 104.4 | 80.6  | 94.83333 | 1 |
| 1 | 95.1  | 87.6  | 91.1  | 98.5  | 72.9  | 154.7 | 111.1333 | 1 |
| 1 | 79.8  | 91.3  | 105.7 | 113.2 | 95.3  | 114.7 | 103.9    | 1 |
| 1 | 95.8  | 123.1 | 93.8  | 97.5  | 98.3  | 91.5  | 102.8    | 1 |
| 1 | 85.2  | 90    | 77.2  | 122.5 | 90.5  | 134.5 | 100.5667 | 1 |
| 1 | 76.6  | 69.8  | 159.6 | 94    | 75.7  | 124.4 | 117.9333 | 1 |
| 1 | 80    | 85.4  | 112.5 | 110.9 | 79.9  | 131.2 | 109.7    | 1 |
| 1 | 119.1 | 79.6  | 91.6  | 126.6 | 105.6 | 77.6  | 82.93333 | 1 |
| 1 | 88    | 97.7  | 103.6 | 104.4 | 99.7  | 106.7 | 102.6667 | 1 |
| 1 | 72.1  | 72.7  | 126.1 | 141   | 62.9  | 125.3 | 108.0333 | 1 |
| 1 | 128.2 | 113.6 | 68.8  | 96.5  | 119   | 73.9  | 85.43333 | 1 |
| 1 | 89.5  | 103.5 | 92.7  | 114.4 | 117.4 | 82.5  | 92.9     | 1 |
| 1 | 118.8 | 139.9 | 71.8  | 85.4  | 95.1  | 89.1  | 100.2667 | 1 |

|   |       |       |       |       |       |       |          |   |
|---|-------|-------|-------|-------|-------|-------|----------|---|
| 1 | 89.6  | 77    | 128.2 | 112.6 | 79.9  | 112.8 | 106      | 1 |
| 1 | 90.6  | 93.8  | 106.1 | 92.1  | 113.5 | 103.8 | 101.2333 | 1 |
| 1 | 115.4 | 73.7  | 94.4  | 127.1 | 104   | 85.4  | 84.5     | 1 |
| 1 | 141.9 | 105.8 | 92.5  | 61.1  | 82.3  | 116.2 | 104.8333 | 1 |
| 1 | 100.8 | 122.8 | 72.1  | 88.5  | 143.6 | 72.2  | 89.03333 | 1 |
| 1 | 167.7 | 110.7 | 71.9  | 78.7  | 113.3 | 57.8  | 80.13333 | 1 |
| 1 | 59.5  | 57.5  | 170.3 | 125.4 | 66    | 121.2 | 116.3333 | 1 |
| 1 | 95.3  | 105.9 | 71.4  | 86.3  | 90.6  | 150.6 | 109.3    | 1 |
| 1 | 102.5 | 114.4 | 64.4  | 81.2  | 142   | 95.5  | 91.43333 | 1 |
| 1 | 37.1  | 31.1  | 58.9  | 28.6  | 385.3 | 58.9  | 49.63333 | 1 |
| 1 | 66.7  | 91.8  | 115.7 | 104.3 | 112   | 109.6 | 105.7    | 1 |
| 1 | 119.5 | 128.3 | 62.1  | 70.7  | 165   | 54.4  | 81.6     | 1 |
| 1 | 100.9 | 104   | 79.9  | 119.1 | 112.6 | 83.5  | 89.13333 | 1 |
| 1 | 109.9 | 116.2 | 79.2  | 85.9  | 98    | 110.7 | 102.0333 | 1 |
| 1 | 66.7  | 57.2  | 181.1 | 98.3  | 63    | 133.8 | 124.0333 | 1 |
| 1 | 118.8 | 98.6  | 76.7  | 96.3  | 130.5 | 79.1  | 84.8     | 1 |
| 1 | 133.8 | 138.8 | 71.5  | 70.5  | 128.2 | 57.2  | 89.16667 | 1 |
| 1 | 131.8 | 138.5 | 90.7  | 71.1  | 81.4  | 86.6  | 105.2667 | 1 |
| 1 | 68.9  | 69.4  | 97    | 117.2 | 83.3  | 164.2 | 110.2    | 1 |
| 1 | 59.8  | 63.3  | 178   | 114.2 | 71.4  | 113.3 | 118.2    | 1 |
| 1 | 60.8  | 55.4  | 167.1 | 127.4 | 70.1  | 119.3 | 113.9333 | 1 |
| 1 | 65    | 91.1  | 124.8 | 107.5 | 95.7  | 115.9 | 110.6    | 1 |
| 1 | 68.3  | 126.7 | 88.8  | 129.1 | 68.3  | 118.8 | 111.4333 | 1 |
| 1 | 141.7 | 89.4  | 104.3 | 104.3 | 87.9  | 72.4  | 88.7     | 1 |
| 1 | 121.3 | 83.4  | 88    | 130.8 | 95.8  | 80.7  | 84.03333 | 1 |
| 1 | 85.7  | 94.5  | 98.3  | 101.1 | 83.2  | 137.1 | 109.9667 | 1 |
| 1 | 68.3  | 73.9  | 118.9 | 86.9  | 72.8  | 179.2 | 124      | 1 |
| 1 | 86.3  | 78    | 100.4 | 106.4 | 77.2  | 151.6 | 110      | 1 |
| 1 | 65.5  | 49.7  | 180.1 | 93.6  | 65.6  | 145.4 | 125.0667 | 1 |
| 1 | 93    | 108.8 | 94.5  | 92.9  | 102.5 | 108.2 | 103.8333 | 1 |
| 1 | 111.8 | 116.9 | 113.3 | 87.1  | 94    | 77.1  | 102.4333 | 1 |
| 1 | 77.6  | 91.1  | 115.6 | 94.8  | 116.2 | 104.6 | 103.7667 | 1 |
| 1 | 146.8 | 98    | 79.4  | 65.6  | 146.8 | 63.3  | 80.23333 | 1 |
| 1 | 73.7  | 82.1  | 128.4 | 106.9 | 85    | 123.8 | 111.4333 | 1 |
| 1 | 107.2 | 81.6  | 105.3 | 156.8 | 59.8  | 89.3  | 92.06667 | 1 |
| 1 | 82.7  | 73    | 114.4 | 106.7 | 80.7  | 142.4 | 109.9333 | 1 |
| 1 | 104.2 | 127.8 | 97    | 71    | 122.9 | 77.1  | 100.6333 | 1 |
| 1 | 107.4 | 107.5 | 92.4  | 87    | 130   | 75.7  | 91.86667 | 1 |
| 1 | 96.1  | 82.2  | 122.6 | 103.7 | 118.6 | 76.8  | 93.86667 | 1 |
| 1 | 89.5  | 87.3  | 121.3 | 92.9  | 84.5  | 124.5 | 111.0333 | 1 |
| 1 | 74.7  | 127.1 | 67.6  | 83.3  | 174.3 | 73    | 89.23333 | 1 |
| 1 | 88.4  | 100.3 | 110.3 | 99    | 79.4  | 122.5 | 111.0333 | 1 |
| 1 | 85.4  | 69    | 127.2 | 95.5  | 82.7  | 140.2 | 112.1333 | 1 |
| 1 | 72.4  | 66.2  | 165.4 | 113.7 | 71    | 111.4 | 114.3333 | 1 |
| 1 | 110.8 | 99.7  | 105.1 | 111.7 | 64.7  | 107.9 | 104.2333 | 1 |
| 1 | 102.8 | 157.8 | 52.8  | 61.6  | 161.7 | 63.3  | 91.3     | 1 |
| 1 | 92.2  | 103.8 | 101   | 95.8  | 94.8  | 112.4 | 105.7333 | 1 |
| 1 | 87.8  | 92.6  | 108.7 | 105.9 | 102.3 | 102.7 | 101.3333 | 1 |
| 1 | 105.4 | 110.7 | 104.4 | 95.9  | 86.9  | 96.7  | 103.9333 | 1 |
| 1 | 88.2  | 66.5  | 135   | 144.4 | 78.4  | 87.6  | 96.36667 | 1 |
| 1 | 77.9  | 80.9  | 109   | 105   | 78.5  | 148.8 | 112.9    | 1 |



|   |       |       |       |       |       |       |          |   |
|---|-------|-------|-------|-------|-------|-------|----------|---|
| 1 | 77.2  | 71.8  | 162   | 132.3 | 76.7  | 80    | 104.6    | 1 |
| 1 | 71    | 74.8  | 146.5 | 115.6 | 81.8  | 110.3 | 110.5333 | 1 |
| 1 | 83.5  | 95.1  | 131.8 | 121.6 | 57.3  | 110.7 | 112.5333 | 1 |
| 1 | 78.7  | 83.4  | 100.7 | 114   | 100.8 | 122.4 | 102.1667 | 1 |
| 1 | 126   | 115.6 | 69.3  | 65.9  | 110.3 | 112.9 | 99.26667 | 1 |
| 1 | 143.6 | 102.3 | 81.7  | 94.8  | 98.1  | 79.5  | 87.83333 | 1 |
| 1 | 57.3  | 60.5  | 165.7 | 103.2 | 65.9  | 147.4 | 124.5333 | 1 |
| 1 | 102.4 | 106.9 | 93.4  | 96.6  | 100.8 | 99.9  | 100.0667 | 1 |
| 1 | 87.3  | 99.8  | 118   | 91    | 116.2 | 87.7  | 101.8333 | 1 |
| 1 | 84.7  | 86.2  | 112.7 | 103.8 | 82    | 130.5 | 109.8    | 1 |
| 1 | 72.2  | 89.7  | 83.1  | 105.8 | 152.3 | 96.9  | 89.9     | 1 |
| 1 | 88.4  | 89    | 81.2  | 78.3  | 86.9  | 176.2 | 115.4667 | 1 |
| 1 | 100.8 | 91.6  | 87.3  | 105.5 | 118.3 | 96.4  | 91.76667 | 1 |
| 1 | 91.5  | 88.4  | 103.1 | 104.6 | 86.5  | 125.8 | 105.7667 | 1 |
| 1 | 173.2 | 77.4  | 81.7  | 75.7  | 126.1 | 66    | 75.03333 | 1 |
| 1 | 138.6 | 74.4  | 74.4  | 111.2 | 94.5  | 107   | 85.26667 | 1 |
| 1 | 79.9  | 53.7  | 44.8  | 167.5 | 59.3  | 194.8 | 97.76667 | 1 |
| 1 | 96.5  | 161.2 | 99.5  | 62.2  | 108   | 72.8  | 111.1667 | 1 |
| 1 | 90.1  | 90.9  | 93    | 103.3 | 77.2  | 145.5 | 109.8    | 1 |
| 1 | 90    | 82.8  | 111.2 | 119.3 | 82    | 114.8 | 102.9333 | 1 |
| 1 | 75.8  | 82.7  | 70.9  | 71.3  | 71.6  | 227.7 | 127.1    | 1 |
| 1 | 82.6  | 83.2  | 115.2 | 108   | 89.5  | 121.5 | 106.6333 | 1 |
| 1 | 121   | 109.1 | 120.8 | 75.3  | 104.7 | 69    | 99.63333 | 1 |
| 1 | 101.8 | 118.2 | 99.4  | 83.1  | 114   | 83.5  | 100.3667 | 1 |
| 1 | 75.5  | 92.8  | 114   | 110.8 | 106   | 100.9 | 102.5667 | 1 |
| 1 | 123.5 | 98.3  | 89.7  | 86.4  | 108.1 | 94.1  | 94.03333 | 1 |
| 1 | 55.7  | 53.1  | 183.8 | 123.8 | 62.4  | 121.2 | 119.3667 | 1 |
| 1 | 117.9 | 120.3 | 97.3  | 86.8  | 104.5 | 73.2  | 96.93333 | 1 |
| 1 | 95.3  | 122   | 114   | 64.6  | 105.6 | 98.5  | 111.5    | 1 |
| 1 | 67    | 90.9  | 134   | 115.8 | 105.8 | 86.5  | 103.8    | 1 |
| 1 | 87.8  | 91.5  | 118.6 | 103.9 | 86.2  | 112.1 | 107.4    | 1 |
| 1 | 169   | 133   | 69.5  | 70.3  | 101.7 | 56.5  | 86.33333 | 1 |
| 1 | 91.4  | 80.4  | 111.9 | 116.7 | 94.4  | 105.2 | 99.16667 | 1 |
| 1 | 71.7  | 63.5  | 131.2 | 89    | 63.7  | 181   | 125.2333 | 1 |
| 1 | 70.1  | 61.8  | 131.3 | 107.5 | 106.3 | 123   | 105.3667 | 1 |
| 1 | 114.7 | 78.3  | 81.7  | 148.2 | 104.4 | 72.7  | 77.56667 | 1 |
| 1 | 82.1  | 99.2  | 120.6 | 101.9 | 103.4 | 92.8  | 104.2    | 1 |
| 1 | 86.5  | 88.8  | 76.5  | 108.3 | 154.9 | 84.9  | 83.4     | 1 |
| 1 | 88.7  | 84.6  | 127.2 | 130.3 | 70.7  | 98.5  | 103.4333 | 1 |
| 1 | 127.7 | 110.6 | 95.9  | 84.1  | 101.4 | 80.3  | 95.6     | 1 |
| 1 | 106.7 | 131   | 74    | 88.8  | 107.5 | 92    | 99       | 1 |
| 1 | 74.5  | 69.5  | 159.7 | 112.2 | 81.1  | 103   | 110.7333 | 1 |
| 1 | 100.1 | 94.4  | 101.9 | 102.4 | 95.7  | 105.4 | 100.5667 | 1 |
| 1 | 129.4 | 96.5  | 97.6  | 123.7 | 112.6 | 40.1  | 78.06667 | 1 |
| 1 | 63.8  | 68.6  | 139.2 | 116.2 | 94.6  | 117.6 | 108.4667 | 1 |
| 1 | 82.9  | 84.7  | 120.2 | 107.3 | 83.3  | 121.6 | 108.8333 | 1 |
| 1 | 80.1  | 104.1 | 106.1 | 101.8 | 105.2 | 102.7 | 104.3    | 1 |
| 1 | 77.2  | 83.7  | 165.2 | 101.6 | 91.1  | 81.3  | 110.0667 | 1 |
| 1 | 158.5 | 156.3 | 60.3  | 65.1  | 104.5 | 55.3  | 90.63333 | 1 |
| 1 | 80.2  | 80.6  | 102.3 | 101.6 | 85.5  | 149.8 | 110.9    | 1 |
| 1 | 166.5 | 86.6  | 85.1  | 77.1  | 92    | 92.7  | 88.13333 | 1 |

|   |       |       |       |       |       |       |          |   |
|---|-------|-------|-------|-------|-------|-------|----------|---|
| 1 | 93.6  | 97.6  | 90.9  | 112.9 | 97    | 108.1 | 98.86667 | 1 |
| 1 | 68.9  | 62.8  | 82.3  | 133.1 | 62.5  | 190.5 | 111.8667 | 1 |
| 1 | 69.4  | 87    | 73.5  | 107.6 | 72.6  | 189.9 | 116.8    | 1 |
| 1 | 128.2 | 123.8 | 87.6  | 85    | 104.2 | 71.2  | 94.2     | 1 |
| 1 | 99.7  | 89.1  | 106.8 | 100.3 | 86.9  | 117.2 | 104.3667 | 1 |
| 1 | 52.4  | 58.1  | 104.2 | 136.1 | 66.8  | 182.4 | 114.9    | 1 |
| 1 | 82.2  | 100.4 | 110.7 | 102.5 | 88.5  | 115.7 | 108.9333 | 1 |
| 1 | 94.4  | 106.9 | 92.8  | 93.3  | 121.8 | 90.8  | 96.83333 | 1 |
| 1 | 103.1 | 93    | 90.7  | 90.7  | 76.2  | 146.3 | 110      | 1 |
| 1 | 85.3  | 105.5 | 86.5  | 130.3 | 112   | 80.5  | 90.83333 | 1 |
| 1 | 138.5 | 78.1  | 69.5  | 89.2  | 121.6 | 103.1 | 83.56667 | 1 |
| 1 | 67.4  | 72.6  | 112.1 | 154.1 | 100.5 | 93.3  | 92.66667 | 1 |
| 1 | 103.8 | 118.4 | 97.9  | 101.5 | 95.1  | 83.4  | 99.9     | 1 |
| 1 | 89.4  | 131.5 | 75.9  | 74.3  | 154.7 | 74.1  | 93.83333 | 1 |
| 1 | 123.6 | 122.8 | 69.5  | 87    | 93    | 104   | 98.76667 | 1 |
| 1 | 79.4  | 97.4  | 103.3 | 113.1 | 86.2  | 120.6 | 107.1    | 1 |
| 1 | 104   | 79.1  | 140.8 | 99.6  | 83.9  | 92.6  | 104.1667 | 1 |
| 1 | 83.5  | 99.3  | 101.2 | 95.4  | 126.3 | 94.2  | 98.23333 | 1 |
| 1 | 137.2 | 97.6  | 82.2  | 94.5  | 110.7 | 77.8  | 85.86667 | 1 |
| 1 | 85.4  | 87.6  | 122.2 | 105.4 | 87.7  | 111.8 | 107.2    | 1 |
| 1 | 80.5  | 78.8  | 101.1 | 111.4 | 86.2  | 142   | 107.3    | 1 |
| 1 | 67.7  | 88.7  | 99.2  | 107.9 | 124.9 | 111.6 | 99.83333 | 1 |
| 1 | 157   | 119.2 | 76.3  | 79.9  | 98.9  | 68.6  | 88.03333 | 1 |
| 1 | 82.7  | 87    | 89.9  | 124.2 | 132.5 | 83.8  | 86.9     | 1 |
| 1 | 107.2 | 108.4 | 91.8  | 97.9  | 86.6  | 108   | 102.7333 | 1 |
| 1 | 111.2 | 82.3  | 81.9  | 163.6 | 93.3  | 67.6  | 77.26667 | 1 |
| 1 | 93    | 106.7 | 73.7  | 80.1  | 88.6  | 158   | 112.8    | 1 |
| 1 | 98.1  | 86.1  | 122   | 105.8 | 93.8  | 94.1  | 100.7333 | 1 |
| 1 | 88.7  | 97.1  | 96.2  | 110.9 | 87.7  | 119.4 | 104.2333 | 1 |
| 1 | 105.3 | 118.8 | 81.2  | 89.2  | 91.9  | 113.6 | 104.5333 | 1 |
| 1 | 80.9  | 103.9 | 104.4 | 113.1 | 105.2 | 92.5  | 100.2667 | 1 |
| 1 | 92    | 87    | 100.8 | 141   | 73.2  | 106   | 97.93333 | 1 |
| 1 | 104.5 | 88.7  | 101.6 | 105.4 | 105.5 | 94.2  | 94.83333 | 1 |
| 1 | 103.6 | 88.9  | 98.6  | 98.1  | 85.2  | 125.7 | 104.4    | 1 |
| 1 | 126.8 | 64.1  | 122.6 | 101.1 | 80    | 105.4 | 97.36667 | 1 |
| 1 | 109.1 | 119.1 | 98.2  | 94.5  | 88    | 91    | 102.7667 | 1 |
| 1 | 59    | 59.6  | 130.7 | 86.2  | 52.1  | 212.5 | 134.2667 | 1 |
| 1 | 81    | 55.6  | 139.6 | 77.8  | 75.4  | 170.6 | 121.9333 | 1 |
| 1 | 127.4 | 103.7 | 68.3  | 124   | 82.3  | 94.3  | 88.76667 | 1 |
| 1 | 80.3  | 69.8  | 122.2 | 89.4  | 64.3  | 174.1 | 122.0333 | 1 |
| 1 | 126.5 | 94    | 74.7  | 111.8 | 117.2 | 75.8  | 81.5     | 1 |
| 1 | 89.3  | 86.7  | 109.6 | 110.9 | 80.8  | 122.6 | 106.3    | 1 |
| 1 | 80.3  | 85.5  | 122.6 | 132.8 | 83.4  | 95.4  | 101.1667 | 1 |
| 1 | 90.4  | 92.8  | 112.1 | 104.3 | 97.8  | 102.6 | 102.5    | 1 |
| 1 | 115.1 | 132.7 | 76.4  | 78.7  | 120.2 | 76.9  | 95.33333 | 1 |
| 1 | 72.8  | 83.4  | 109.7 | 87.6  | 81.9  | 164.6 | 119.2333 | 1 |
| 1 | 80.8  | 78.1  | 120.3 | 98    | 84.5  | 138.4 | 112.2667 | 1 |
| 1 | 109.8 | 103.8 | 88.9  | 99    | 125.8 | 72.7  | 88.46667 | 1 |
| 1 | 116.1 | 137.1 | 85    | 88.2  | 97.6  | 76    | 99.36667 | 1 |
| 1 | 97.5  | 93.9  | 114.2 | 85.1  | 90    | 119.2 | 109.1    | 1 |
| 1 | 94    | 109.2 | 91    | 102   | 94.9  | 108.8 | 103      | 1 |

|   |       |       |       |       |       |       |          |   |
|---|-------|-------|-------|-------|-------|-------|----------|---|
| 1 | 108.6 | 70.8  | 106.8 | 115   | 113.6 | 85.2  | 87.6     | 1 |
| 1 | 68.3  | 95.8  | 108.3 | 125.5 | 68.3  | 133.8 | 112.6333 | 1 |
| 1 | 124.6 | 97.1  | 94.6  | 90.9  | 104.4 | 88.4  | 93.36667 | 1 |
| 1 | 100.8 | 105.1 | 103.2 | 89.9  | 115.1 | 85.9  | 98.06667 | 1 |
| 1 | 104.1 | 126.8 | 85.7  | 87    | 107.1 | 89.3  | 100.6    | 1 |
| 1 | 151   | 100   | 88.1  | 85.4  | 102.9 | 72.6  | 86.9     | 1 |
| 1 | 103.3 | 90.2  | 93.6  | 108.9 | 107   | 97    | 93.6     | 1 |
| 1 | 91.1  | 74    | 126.7 | 97.2  | 75.2  | 135.8 | 112.1667 | 1 |
| 1 | 173.9 | 117.1 | 87.3  | 74.5  | 76.2  | 71    | 91.8     | 1 |
| 1 | 73.8  | 73.6  | 141.8 | 120.5 | 74.7  | 115.7 | 110.3667 | 1 |
| 1 | 91.9  | 103.5 | 101.8 | 99.2  | 111.4 | 92.3  | 99.2     | 1 |
| 1 | 86.9  | 79.7  | 112   | 88.5  | 77.6  | 155.3 | 115.6667 | 1 |
| 1 | 80.5  | 99.7  | 106.2 | 89.3  | 125.7 | 98.6  | 101.5    | 1 |
| 1 | 106.3 | 92.5  | 124.4 | 98.7  | 92.3  | 85.8  | 100.9    | 1 |
| 1 | 67.8  | 54.7  | 149.3 | 112.3 | 59.7  | 156.2 | 120.0667 | 1 |
| 1 | 126   | 78.3  | 97.3  | 77.3  | 130   | 90.9  | 88.83333 | 1 |
| 1 | 82.5  | 91.5  | 104.1 | 98.8  | 90.1  | 133.1 | 109.5667 | 1 |
| 1 | 119.5 | 85.3  | 80.5  | 108   | 134.3 | 72.5  | 79.43333 | 1 |
| 1 | 82    | 84.9  | 103.9 | 109.6 | 91.3  | 128.2 | 105.6667 | 1 |
| 1 | 96.6  | 76.1  | 115.6 | 90.6  | 107.8 | 113.3 | 101.6667 | 1 |
| 1 | 84.8  | 104.5 | 94.9  | 104.8 | 99.3  | 111.8 | 103.7333 | 1 |
| 1 | 122.7 | 114.1 | 85.4  | 81.3  | 105.6 | 90.9  | 96.8     | 1 |
| 1 | 76.1  | 75.2  | 110.9 | 81.6  | 66.8  | 189.5 | 125.2    | 1 |
| 1 | 94.4  | 138.7 | 91.4  | 84.8  | 119   | 71.7  | 100.6    | 1 |
| 1 | 95.4  | 99    | 98.8  | 105.7 | 97.3  | 103.8 | 100.5333 | 1 |
| 1 | 86.8  | 88.2  | 116.2 | 99.4  | 89.6  | 119.8 | 108.0667 | 1 |
| 1 | 108.1 | 101.2 | 68.7  | 102.3 | 123.6 | 96.1  | 88.66667 | 1 |
| 1 | 82.5  | 92    | 112.4 | 95    | 117.9 | 100.2 | 101.5333 | 1 |
| 1 | 85.3  | 80.1  | 108.1 | 116.6 | 96.3  | 113.7 | 100.6333 | 1 |
| 1 | 61.6  | 83.6  | 118.6 | 123.6 | 100.8 | 111.7 | 104.6333 | 1 |
| 1 | 67.8  | 59.9  | 127   | 133.6 | 73.3  | 138.4 | 108.4333 | 1 |
| 1 | 66    | 78.8  | 110.4 | 94.1  | 82.9  | 167.9 | 119.0333 | 1 |
| 1 | 114   | 111.1 | 87    | 80.4  | 132.3 | 75.2  | 91.1     | 1 |
| 1 | 89.8  | 73.5  | 89.4  | 104.3 | 88.1  | 154.9 | 105.9333 | 1 |
| 1 | 88.3  | 104.4 | 95.2  | 112.2 | 92.7  | 107.2 | 102.2667 | 1 |
| 1 | 87.1  | 114.2 | 83.4  | 84.2  | 134.4 | 96.7  | 98.1     | 1 |
| 1 | 112.4 | 101.3 | 83    | 95.3  | 98    | 109.9 | 98.06667 | 1 |
| 1 | 99.3  | 82.9  | 97.9  | 121.6 | 107.1 | 91.2  | 90.66667 | 1 |
| 1 | 99.1  | 105.5 | 95.6  | 93.1  | 106.7 | 100   | 100.3667 | 1 |
| 1 | 111.1 | 174.4 | 59.5  | 61.1  | 97.3  | 96.6  | 110.1667 | 1 |
| 1 | 79.5  | 125.3 | 88.6  | 131.1 | 104.3 | 71.2  | 95.03333 | 1 |
| 1 | 75.4  | 67.3  | 106   | 120.3 | 62.2  | 168.8 | 114.0333 | 1 |
| 1 | 89    | 106.1 | 101.3 | 94.9  | 108.5 | 100.2 | 102.5333 | 1 |
| 1 | 289.2 | 52.4  | 83.9  | 64.4  | 53.1  | 57    | 64.43333 | 1 |
| 1 | 99.2  | 93    | 92.4  | 112.5 | 99.7  | 103.1 | 96.16667 | 1 |
| 1 | 107.6 | 99    | 111.9 | 86.9  | 91.7  | 102.9 | 104.6    | 1 |
| 1 | 98.2  | 141.6 | 88.5  | 82.4  | 116.5 | 72.8  | 100.9667 | 1 |
| 1 | 90    | 94.9  | 80.2  | 111.9 | 139.3 | 83.8  | 86.3     | 1 |
| 1 | 88.1  | 97.7  | 103.7 | 112.8 | 96.2  | 101.4 | 100.9333 | 1 |
| 1 | 96.6  | 76.6  | 85.1  | 124.7 | 94.4  | 122.6 | 94.76667 | 1 |
| 1 | 113.5 | 189.4 | 61.9  | 60.9  | 115.8 | 58.5  | 103.2667 | 1 |

|   |       |       |       |       |       |       |          |   |
|---|-------|-------|-------|-------|-------|-------|----------|---|
| 1 | 113.7 | 102.9 | 76.4  | 79.2  | 85.8  | 142   | 107.1    | 1 |
| 1 | 83    | 92    | 93    | 127.5 | 94.2  | 110.2 | 98.4     | 1 |
| 1 | 79.5  | 84.1  | 99.5  | 115.8 | 91.7  | 129.4 | 104.3333 | 1 |
| 1 | 79.3  | 77.5  | 111.3 | 110   | 77.8  | 144.2 | 111      | 1 |
| 1 | 107.1 | 147.2 | 102.8 | 75.4  | 96.1  | 71.4  | 107.1333 | 1 |
| 1 | 85.4  | 96.7  | 115.7 | 110.6 | 93.1  | 98.5  | 103.6333 | 1 |
| 1 | 104.1 | 105.1 | 77.8  | 80.4  | 78.2  | 154.5 | 112.4667 | 1 |
| 1 | 75.9  | 55.7  | 149   | 171.1 | 46.6  | 101.7 | 102.1333 | 1 |
| 1 | 88    | 93.3  | 102.7 | 97.3  | 79.7  | 139   | 111.6667 | 1 |
| 1 | 142.5 | 110.3 | 80.9  | 81.7  | 114.4 | 70.2  | 87.13333 | 1 |
| 1 | 73.8  | 67.9  | 108.8 | 129.9 | 73.9  | 145.7 | 107.4667 | 1 |
| 1 | 75.9  | 80.8  | 107.7 | 104.3 | 90.2  | 141.2 | 109.9    | 1 |
| 1 | 77.4  | 81.4  | 107.6 | 102.5 | 80.6  | 150.5 | 113.1667 | 1 |
| 1 | 90.1  | 122.2 | 98.9  | 88.4  | 113.2 | 87.3  | 102.8    | 1 |
| 1 | 100.7 | 110.4 | 101.6 | 96.2  | 109   | 82    | 98       | 1 |
| 1 | 92.5  | 83.7  | 118.9 | 82.2  | 84.7  | 138   | 113.5333 | 1 |
| 1 | 75.8  | 90.9  | 121   | 104   | 79.4  | 128.9 | 113.6    | 1 |
| 1 | 110.3 | 126.7 | 71.3  | 78.3  | 106.8 | 106.6 | 101.5333 | 1 |
| 1 | 77.7  | 92.2  | 116.7 | 106   | 98    | 109.5 | 106.1333 | 1 |
| 1 | 96.1  | 110   | 92.2  | 99.1  | 95.7  | 106.9 | 103.0333 | 1 |
| 1 | 116.3 | 107.7 | 103.4 | 78.1  | 89.5  | 104.9 | 105.3333 | 1 |
| 1 | 85    | 81.6  | 122.1 | 106.4 | 97.7  | 107.1 | 103.6    | 1 |
| 1 | 84.5  | 90.2  | 110.3 | 105.7 | 80    | 129.2 | 109.9    | 1 |
| 1 | 81.8  | 94.7  | 108.5 | 95    | 88.7  | 131.3 | 111.5    | 1 |
| 1 | 106.4 | 79.6  | 86.3  | 88.7  | 150.2 | 88.7  | 84.86667 | 1 |
| 1 | 65.8  | 56    | 92.7  | 120   | 152.5 | 113.1 | 87.26667 | 1 |
| 1 | 81.2  | 110.9 | 95.1  | 117.7 | 99.8  | 95.3  | 100.4333 | 1 |
| 1 | 92.6  | 92.2  | 119.2 | 98.3  | 85.8  | 112.1 | 107.8333 | 1 |
| 1 | 104.4 | 114.5 | 99.8  | 94.9  | 93    | 93.5  | 102.6    | 1 |
| 1 | 137.4 | 105.9 | 76.8  | 104.8 | 115   | 60    | 80.9     | 1 |
| 1 | NA       | 0 |
| 1 | 94    | 103.7 | 103.5 | 93.2  | 100.8 | 104.8 | 104      | 1 |
| 1 | 78.9  | 111.6 | 74.2  | 80.4  | 186.8 | 68.2  | 84.66667 | 1 |
| 1 | 77.1  | 84.1  | 102.8 | 99.9  | 85.8  | 150.3 | 112.4    | 1 |
| 1 | 137   | 132.7 | 73.9  | 65.4  | 144.4 | 46.6  | 84.4     | 1 |
| 1 | 101.2 | 100.3 | 94    | 101.7 | 124.3 | 78.5  | 90.93333 | 1 |
| 1 | 91.4  | 83.5  | 113.3 | 151.7 | 62.4  | 97.8  | 98.2     | 1 |
| 1 | 67.4  | 57.3  | 102.4 | 161.3 | 70.5  | 141.1 | 100.2667 | 1 |
| 1 | 86.8  | 106.2 | 82.8  | 91.4  | 136.2 | 96.7  | 95.23333 | 1 |
| 1 | 96    | 87.3  | 94.6  | 96.5  | 88.3  | 137.3 | 106.4    | 1 |
| 1 | 101.5 | 95.1  | 116.7 | 94.2  | 111.1 | 81.4  | 97.73333 | 1 |
| 1 | 99    | 87.2  | 96.5  | 114.9 | 90.5  | 112   | 98.56667 | 1 |
| 1 | 76.5  | 87    | 109.9 | 92    | 118.8 | 115.8 | 104.2333 | 1 |
| 1 | 124.3 | 96.8  | 94.1  | 97.4  | 105.4 | 81.9  | 90.93333 | 1 |
| 1 | 79.8  | 79.5  | 107.1 | 119.1 | 86.9  | 127.6 | 104.7333 | 1 |
| 1 | 67.7  | 61.2  | 254.6 | 69.7  | 74.4  | 72.3  | 129.3667 | 1 |
| 1 | 116.2 | 80.6  | 82.7  | 99.6  | 121   | 99.9  | 87.73333 | 1 |
| 1 | 80.3  | 93.6  | 103.6 | 113.5 | 101.8 | 107.1 | 101.4333 | 1 |
| 1 | 80.4  | 86.3  | 136.1 | 105.3 | 96.2  | 95.7  | 106.0333 | 1 |
| 1 | 81.2  | 88.5  | 117.3 | 95.9  | 113.7 | 103.3 | 103.0333 | 1 |
| 1 | 97.6  | 108.3 | 72.3  | 85.1  | 100.3 | 136.4 | 105.6667 | 1 |

|   |       |       |       |       |       |       |          |   |
|---|-------|-------|-------|-------|-------|-------|----------|---|
| 1 | 104.2 | 94.5  | 94.1  | 93.8  | 100.9 | 112.5 | 100.3667 | 1 |
| 1 | 74.1  | 80.8  | 146.7 | 111.7 | 84.1  | 102.6 | 110.0333 | 1 |
| 1 | 72.6  | 81.8  | 117.1 | 109.9 | 101.4 | 117.3 | 105.4    | 1 |
| 1 | 105.9 | 119.8 | 96.8  | 89.6  | 92.4  | 95.6  | 104.0667 | 1 |
| 1 | 115.3 | 116.4 | 72.2  | 65.9  | 169.8 | 60.3  | 82.96667 | 1 |
| 1 | 88.8  | 75.6  | 132   | 87.1  | 77.9  | 138.6 | 115.4    | 1 |
| 1 | 76.6  | 83.8  | 117.7 | 107.1 | 79.6  | 135.3 | 112.2667 | 1 |
| 1 | 60.8  | 98.4  | 103.8 | 87.8  | 89.7  | 159.6 | 120.6    | 1 |
| 1 | 105.2 | 109.8 | 90.8  | 84    | 111.3 | 99    | 99.86667 | 1 |
| 1 | 69.9  | 154.3 | 87.2  | 86.5  | 117.6 | 84.5  | 108.6667 | 1 |
| 1 | 94.8  | 103   | 96.5  | 107.5 | 92.4  | 105.8 | 101.7667 | 1 |
| 1 | 81.8  | 97.2  | 108.1 | 107.9 | 89.7  | 115.3 | 106.8667 | 1 |
| 1 | 100.1 | 136   | 108.9 | 77    | 127.7 | 50.2  | 98.36667 | 1 |
| 1 | 93.2  | 117.7 | 97.8  | 100.7 | 100.8 | 89.7  | 101.7333 | 1 |
| 1 | 94.6  | 114   | 92.7  | 107   | 96.4  | 95.3  | 100.6667 | 1 |
| 1 | 90.2  | 86    | 98.8  | 110.2 | 118.6 | 96.3  | 93.7     | 1 |
| 1 | 63.6  | 59.3  | 154.4 | 111.8 | 71.1  | 139.7 | 117.8    | 1 |
| 1 | 109.5 | 95.5  | 93.4  | 106.3 | 110.1 | 85.2  | 91.36667 | 1 |
| 1 | 82.9  | 114.7 | 128   | 83.8  | 118.2 | 72.3  | 105      | 1 |
| 1 | 87.5  | 109.5 | 109.6 | 92.7  | 110.9 | 89.9  | 103      | 1 |
| 1 | 87.5  | 103.9 | 102.2 | 109.5 | 101   | 95.9  | 100.6667 | 1 |
| 1 | 108.1 | 57.8  | 175.6 | 109.1 | 65.2  | 84.2  | 105.8667 | 1 |
| 1 | 93.9  | 103.5 | 112   | 91.8  | 123.7 | 75.2  | 96.9     | 1 |
| 1 | 110   | 112.9 | 96.4  | 102   | 103   | 75.8  | 95.03333 | 1 |
| 1 | 90.2  | 90.4  | 108.4 | 109.8 | 102.7 | 98.6  | 99.13333 | 1 |
| 1 | 68.2  | 78.9  | 93.1  | 108.4 | 73.9  | 177.5 | 116.5    | 1 |
| 1 | 87.2  | 75.1  | 136.9 | 94.8  | 80.8  | 125   | 112.3333 | 1 |
| 1 | 125.8 | 144.7 | 67.9  | 80    | 99.1  | 82.5  | 98.36667 | 1 |
| 1 | 107   | 109.3 | 99.6  | 90.2  | 90.4  | 103.4 | 104.1    | 1 |
| 1 | 99.1  | 102   | 80.6  | 78.4  | 93.6  | 146.3 | 109.6333 | 1 |
| 1 | 120.2 | 89.5  | 87.3  | 97.4  | 79    | 126.6 | 101.1333 | 1 |
| 1 | 109.1 | 140.5 | 76.6  | 65.3  | 145.9 | 62.6  | 93.23333 | 1 |
| 1 | 69.5  | 123.7 | 73.2  | 82.8  | 185.1 | 65.7  | 87.53333 | 1 |
| 1 | 88.3  | 113.8 | 80.6  | 88.5  | 98.8  | 130.1 | 108.1667 | 1 |
| 1 | 165.1 | 110.3 | 73.2  | 86.4  | 85.6  | 79.4  | 87.63333 | 1 |
| 1 | 99.9  | 102.8 | 120.2 | 97.7  | 94.2  | 85.2  | 102.7333 | 1 |
| 1 | 95.4  | 102.9 | 88.2  | 83.2  | 80.2  | 150.1 | 113.7333 | 1 |
| 1 | 81.3  | 79.7  | 114.3 | 112   | 79.8  | 133   | 109      | 1 |
| 1 | 98.8  | 103   | 94.5  | 100.8 | 93.8  | 109.1 | 102.2    | 1 |
| 1 | 90.7  | 99.1  | 93.4  | 102.6 | 94.5  | 119.6 | 104.0333 | 1 |
| 1 | 100.3 | 102.2 | 105.1 | 100.5 | 101.7 | 90.2  | 99.16667 | 1 |
| 1 | 98.4  | 95.6  | 106.5 | 98    | 91.3  | 110.3 | 104.1333 | 1 |
| 1 | 76.8  | 97.1  | 142.7 | 104.8 | 82.8  | 95.9  | 111.9    | 1 |
| 1 | 124.2 | 93.1  | 79.4  | 96.7  | 81.7  | 125   | 99.16667 | 1 |
| 1 | 114.8 | 107.1 | 77.7  | 92.7  | 112   | 95.7  | 93.5     | 1 |
| 1 | 54.6  | 71.3  | 93.8  | 155.8 | 84    | 140.4 | 101.8333 | 1 |
| 1 | 106   | 89.9  | 126   | 106.5 | 76.2  | 95.4  | 103.7667 | 1 |
| 1 | 98.7  | 79.9  | 110.8 | 108.7 | 98.5  | 103.4 | 98.03333 | 1 |
| 1 | 276.7 | 76.7  | 49.6  | 60.7  | 82.3  | 53.9  | 60.06667 | 1 |
| 1 | 103.3 | 100.1 | 107.5 | 91.1  | 85.4  | 112.6 | 106.7333 | 1 |
| 1 | 107.7 | 128   | 86    | 82.6  | 117.4 | 78.2  | 97.4     | 1 |

|   |       |       |       |       |       |       |          |   |
|---|-------|-------|-------|-------|-------|-------|----------|---|
| 1 | 84.3  | 111.2 | 112.4 | 115.4 | 79.7  | 97    | 106.8667 | 1 |
| 1 | 61.5  | 84.5  | 145.8 | 98.6  | 77.6  | 132.1 | 120.8    | 1 |
| 1 | 75.1  | 108.3 | 87.4  | 90.3  | 123.7 | 115   | 103.5667 | 1 |
| 1 | 56.7  | 49.8  | 161.1 | 136.8 | 51.3  | 144.3 | 118.4    | 1 |
| 1 | 94.3  | 88.7  | 107.3 | 106.4 | 92.3  | 111.1 | 102.3667 | 1 |
| 1 | 61    | 60.3  | 162.2 | 121.3 | 58.2  | 137   | 119.8333 | 1 |
| 1 | 105.6 | 112.4 | 72.9  | 79.1  | 104.9 | 125   | 103.4333 | 1 |
| 1 | 124.6 | 120.9 | 69.4  | 80.9  | 121.9 | 82.4  | 90.9     | 1 |
| 1 | 122.4 | 95.8  | 96.1  | 105.9 | 96.6  | 83.2  | 91.7     | 1 |
| 1 | 87.1  | 80.9  | 112.4 | 114.9 | 85.2  | 119.5 | 104.2667 | 1 |
| 1 | 105.8 | 89.8  | 94.5  | 104.6 | 90.9  | 114.3 | 99.53333 | 1 |
| 1 | 98.3  | 67.5  | 90.4  | 149.2 | 103.6 | 91.1  | 83       | 1 |
| 1 | 76.9  | 97.1  | 115.7 | 116.3 | 95.7  | 98.4  | 103.7333 | 1 |
| 1 | 110.7 | 111   | 83.7  | 84.4  | 120.6 | 89.7  | 94.8     | 1 |
| 1 | 132.2 | 110.3 | 76.7  | 94.8  | 102.2 | 83.8  | 90.26667 | 1 |
| 1 | 98.7  | 98    | 100   | 98.9  | 99.3  | 105.1 | 101.0333 | 1 |
| 1 | 80    | 97.6  | 109.2 | 129.2 | 79.2  | 104.9 | 103.9    | 1 |
| 1 | 91.3  | 100.6 | 97.2  | 100   | 103.7 | 107.1 | 101.6333 | 1 |
| 1 | 78.3  | 86.3  | 162.5 | 99.5  | 85.8  | 87.5  | 112.1    | 1 |
| 1 | 90.6  | 92.5  | 99.5  | 105.7 | 91.8  | 120   | 104      | 1 |
| 1 | 101   | 100.4 | 103.2 | 96.1  | 86.4  | 112.9 | 105.5    | 1 |
| 1 | NA       | 0 |
| 1 | 85.7  | 88    | 104.7 | 153.6 | 74.5  | 93.5  | 95.4     | 1 |
| 1 | 89.3  | 109.2 | 97.4  | 88.9  | 110.4 | 104.8 | 103.8    | 1 |
| 1 | 92.6  | 108.7 | 99.7  | 90.6  | 86.2  | 122.3 | 110.2333 | 1 |
| 1 | 97.3  | 93.5  | 93.2  | 122.4 | 118.6 | 75    | 87.23333 | 1 |
| 1 | 68.5  | 71.5  | 156.5 | 111.4 | 72.1  | 119.9 | 115.9667 | 1 |
| 1 | 76.2  | 73.8  | 110.7 | 155.3 | 90.5  | 93.5  | 92.66667 | 1 |
| 1 | 75.7  | 72    | 100   | 111.6 | 86.5  | 154.2 | 108.7333 | 1 |
| 1 | 72.1  | 100.3 | 113.9 | 120.6 | 99.5  | 93.7  | 102.6333 | 1 |
| 1 | 73.2  | 84.9  | 117.6 | 111.5 | 94.2  | 118.6 | 107.0333 | 1 |
| 1 | 139.1 | 89.1  | 89.8  | 87.8  | 94.7  | 99.5  | 92.8     | 1 |
| 1 | 106.6 | 110   | 93    | 94.2  | 112.6 | 83.5  | 95.5     | 1 |
| 1 | 61.9  | 71.7  | 139.9 | 110.4 | 78.7  | 137.4 | 116.3333 | 1 |
| 1 | 94    | 116.5 | 93.7  | 95    | 101.8 | 98.9  | 103.0333 | 1 |
| 1 | 104   | 138.5 | 78    | 88.1  | 113.6 | 77.9  | 98.13333 | 1 |
| 1 | 76.2  | 78.6  | 111.9 | 108.3 | 84.3  | 140.9 | 110.4667 | 1 |
| 1 | NA       | 0 |
| 1 | 76.8  | 86    | 110.4 | 114   | 83.7  | 129.1 | 108.5    | 1 |
| 1 | 97.6  | 118.1 | 110.3 | 80.4  | 107.3 | 86.3  | 104.9    | 1 |
| 1 | 89.6  | 98.8  | 95.8  | 105.4 | 94.2  | 116.2 | 103.6    | 1 |
| 1 | 78.8  | 92.6  | 145.2 | 103.6 | 91.8  | 88    | 108.6    | 1 |
| 1 | 65    | 75.1  | 116.2 | 113.2 | 86.3  | 144.1 | 111.8    | 1 |
| 1 | 133.8 | 77.9  | 98.8  | 98.8  | 74.3  | 116.5 | 97.73333 | 1 |
| 1 | 136.9 | 112.4 | 68.2  | 68.2  | 142.8 | 71.6  | 84.06667 | 1 |
| 1 | 72.9  | 119.3 | 102.6 | 109.3 | 102.3 | 93.5  | 105.1333 | 1 |
| 1 | 81.2  | 76.9  | 103.4 | 112.5 | 80.3  | 145.8 | 108.7    | 1 |
| 1 | 112.9 | 127.2 | 91.8  | 84.3  | 71.8  | 111.9 | 110.3    | 1 |
| 1 | 78    | 65.3  | 97.6  | 147.8 | 90.1  | 121.3 | 94.73333 | 1 |
| 1 | 73.6  | 99.8  | 96.6  | 151.5 | 73.9  | 104.5 | 100.3    | 1 |
| 1 | 149.8 | 109   | 83.1  | 91.6  | 96.8  | 69.7  | 87.26667 | 1 |

|   |       |       |       |       |       |       |          |   |
|---|-------|-------|-------|-------|-------|-------|----------|---|
| 1 | 88.5  | 164.3 | 76.6  | 73.3  | 140.3 | 57    | 99.3     | 1 |
| 1 | 86.2  | 113.3 | 96    | 87    | 137.3 | 80.1  | 96.46667 | 1 |
| 1 | 81.1  | 116.7 | 79.6  | 94.9  | 91.4  | 136.3 | 110.8667 | 1 |
| 1 | 80.1  | 90.2  | 118.2 | 112.9 | 116.1 | 82.5  | 96.96667 | 1 |
| 1 | 86.6  | 88.5  | 133.8 | 97.9  | 72.3  | 121   | 114.4333 | 1 |
| 1 | 57.2  | 46.9  | 139.2 | 78.9  | 51.3  | 226.5 | 137.5333 | 1 |
| 1 | 120.8 | 90.4  | 109.3 | 94.4  | 103.9 | 81.4  | 93.7     | 1 |
| 1 | 83.4  | 88.6  | 100.3 | 99.6  | 103.1 | 125.1 | 104.6667 | 1 |
| 1 | 88.8  | 103.1 | 98.3  | 105   | 98.7  | 106.1 | 102.5    | 1 |
| 1 | 75.4  | 94.2  | 105.8 | 93.1  | 100.7 | 130.8 | 110.2667 | 1 |
| 1 | 78.3  | 82.8  | 129.2 | 102.3 | 85.9  | 121.6 | 111.2    | 1 |
| 1 | 75    | 122   | 98.6  | 86.6  | 130.6 | 87.2  | 102.6    | 1 |
| 1 | 97    | 85.3  | 109.2 | 106.9 | 98.9  | 102.7 | 99.06667 | 1 |
| 1 | 83.3  | 78.1  | 118   | 118.3 | 87.6  | 114.8 | 103.6333 | 1 |
| 1 | 105.6 | 88.8  | 83.1  | 118.1 | 95.1  | 109.2 | 93.7     | 1 |
| 1 | 82.9  | 91.5  | 101.1 | 109.7 | 108.9 | 105.9 | 99.5     | 1 |
| 1 | 53.1  | 59.8  | 123.1 | 194.1 | 79.2  | 90.7  | 91.2     | 1 |
| 1 | 104.7 | 101.1 | 98.9  | 85.4  | 81.9  | 128   | 109.3333 | 1 |
| 1 | NA       | 0 |
| 1 | NA       | 0 |
| 1 | 105.1 | 133.2 | 76.8  | 96.7  | 102.5 | 85.8  | 98.6     | 1 |
| 1 | 84.2  | 83.6  | 111.6 | 106   | 94.4  | 120.1 | 105.1    | 1 |
| 1 | NA       | 0 |
| 1 | 102.2 | 103.3 | 109.9 | 87.4  | 82.3  | 115   | 109.4    | 1 |
| 1 | 103.4 | 98    | 108.5 | 101.8 | 102.2 | 86    | 97.5     | 1 |
| 1 | 94    | 106.5 | 99.1  | 97.4  | 86.7  | 116.4 | 107.3333 | 1 |
| 1 | 103.4 | 100.3 | 99.1  | 96.2  | 113.5 | 87.4  | 95.6     | 1 |
| 1 | 55    | 55.2  | 218.8 | 144.1 | 51.2  | 75.7  | 116.5667 | 1 |
| 1 | 122   | 97.3  | 109.1 | 93.1  | 91.7  | 86.7  | 97.7     | 1 |
| 1 | 87.8  | 96.2  | 86.2  | 149.8 | 94.2  | 85.7  | 89.36667 | 1 |
| 1 | 82.6  | 78.2  | 115.8 | 108.6 | 83.3  | 131.5 | 108.5    | 1 |
| 1 | 84    | 77.8  | 94.5  | 96.6  | 72.8  | 174.2 | 115.5    | 1 |
| 1 | 82.6  | 89.7  | 113   | 97.5  | 74.2  | 143.1 | 115.2667 | 1 |
| 1 | 84.4  | 97.2  | 110.3 | 122.5 | 82.9  | 102.9 | 103.4667 | 1 |
| 1 | 92.2  | 89.9  | 112.9 | 101.8 | 85.7  | 117.5 | 106.7667 | 1 |
| 1 | 90    | 99.7  | 104.6 | 102.6 | 84    | 119.2 | 107.8333 | 1 |
| 1 | NA       | 0 |
| 1 | 106.7 | 105.8 | 102.7 | 83.9  | 98    | 102.8 | 103.7667 | 1 |
| 1 | 106.8 | 96.5  | 95.4  | 93.4  | 120   | 88    | 93.3     | 1 |
| 1 | 78    | 127.8 | 98.3  | 84.2  | 122   | 89.7  | 105.2667 | 1 |
| 1 | 103.7 | 124.1 | 71.8  | 77.5  | 110.7 | 112.1 | 102.6667 | 1 |
| 1 | 89.4  | 96.3  | 115.2 | 93.1  | 91.8  | 114.2 | 108.5667 | 1 |
| 1 | 86.1  | 92.1  | 108.6 | 104.6 | 109.6 | 98.9  | 99.86667 | 1 |
| 1 | 88.5  | 98.8  | 101.6 | 99.2  | 83.4  | 128.5 | 109.6333 | 1 |
| 1 | 86.3  | 92.6  | 115.5 | 109.5 | 101.6 | 94.6  | 100.9    | 1 |
| 1 | 82    | 87.2  | 102.4 | 119.6 | 83.5  | 125.2 | 104.9333 | 1 |
| 1 | 82.3  | 72.8  | 114.8 | 100.6 | 84    | 145.4 | 111      | 1 |
| 1 | 68.2  | 93.2  | 128.4 | 106   | 88.9  | 115.2 | 112.2667 | 1 |
| 1 | 109.5 | 105.7 | 88.7  | 96.4  | 93.9  | 105.8 | 100.0667 | 1 |
| 1 | 160   | 127.7 | 73.1  | 67.5  | 99.3  | 72.4  | 91.06667 | 1 |
| 1 | 115.1 | 109.8 | 77.5  | 85.4  | 75.9  | 136.3 | 107.8667 | 1 |

|   |       |       |       |       |       |       |          |   |
|---|-------|-------|-------|-------|-------|-------|----------|---|
| 1 | 72.4  | 63.1  | 135.7 | 129.1 | 97.3  | 102.4 | 100.4    | 1 |
| 1 | 87.7  | 88.9  | 95.7  | 99.3  | 79.3  | 149.1 | 111.2333 | 1 |
| 1 | 114.9 | 99.1  | 108.5 | 112.4 | 97.4  | 67.8  | 91.8     | 1 |
| 1 | 71.2  | 89    | 121.3 | 112.1 | 87    | 119.5 | 109.9333 | 1 |
| 1 | 92.3  | 92.3  | 122.4 | 103.5 | 101.2 | 88.3  | 101      | 1 |
| 1 | NA       | 0 |
| 1 | 100.5 | 120.5 | 74.5  | 83.9  | 94.4  | 126.2 | 107.0667 | 1 |
| 1 | 80.9  | 79.3  | 134   | 133.7 | 86.8  | 85.3  | 99.53333 | 1 |
| 1 | 87.8  | 81.6  | 113.9 | 108.3 | 87.6  | 120.8 | 105.4333 | 1 |
| 1 | NA       | 0 |
| 1 | 86    | 90    | 112.7 | 107.3 | 105.4 | 98.6  | 100.4333 | 1 |
| 1 | 71.1  | 71.7  | 106.9 | 96.3  | 83.3  | 170.7 | 116.4333 | 1 |
| 1 | 78    | 90.4  | 113.9 | 135.9 | 81    | 100.8 | 101.7    | 1 |
| 1 | 108.8 | 88.1  | 97.5  | 98.8  | 107.5 | 99.4  | 95       | 1 |
| 1 | 98    | 98.1  | 107.4 | 95.4  | 90.9  | 110.2 | 105.2333 | 1 |
| 1 | 119.5 | 97.8  | 107.7 | 89.7  | 103.9 | 81.4  | 95.63333 | 1 |
| 1 | 97.1  | 91.4  | 95.7  | 98    | 132.3 | 85.5  | 90.86667 | 1 |
| 1 | 85.2  | 80.8  | 113.3 | 104.6 | 89.7  | 126.4 | 106.8333 | 1 |
| 1 | 94.1  | 101.2 | 84    | 99.9  | 116.3 | 104.5 | 96.56667 | 1 |
| 1 | 161.4 | 113.2 | 81    | 83.4  | 102.3 | 58.7  | 84.3     | 1 |
| 1 | 91.2  | 118.5 | 70.5  | 77    | 123.3 | 119.4 | 102.8    | 1 |
| 1 | 111.8 | 112.3 | 83    | 99.1  | 95.6  | 98.2  | 97.83333 | 1 |
| 1 | 90.2  | 98.7  | 101.2 | 101.7 | 119.8 | 88.4  | 96.1     | 1 |
| 1 | NA       | 0 |
| 1 | 73.7  | 103.9 | 120.9 | 108.1 | 87.5  | 105.9 | 110.2333 | 1 |
| 1 | 88    | 107.3 | 97.2  | 89.2  | 123.3 | 95    | 99.83333 | 1 |
| 1 | 72.1  | 76.8  | 121   | 115.5 | 107.9 | 106.8 | 101.5333 | 1 |
| 1 | 69    | 58.9  | 107.2 | 94.7  | 102.1 | 168.1 | 111.4    | 1 |
| 1 | 67.3  | 77.4  | 118.2 | 109.2 | 83.9  | 144.1 | 113.2333 | 1 |
| 1 | 74.6  | 98    | 115.6 | 132.8 | 80.6  | 98.3  | 103.9667 | 1 |
| 1 | 81.6  | 84.9  | 118   | 80.7  | 98.8  | 136   | 112.9667 | 1 |
| 1 | 77.1  | 88.8  | 95.3  | 146.8 | 86.3  | 105.7 | 96.6     | 1 |
| 1 | 67.8  | 103   | 113.5 | 120.1 | 68.7  | 126.9 | 114.4667 | 1 |
| 1 | 146.4 | 85.3  | 84.6  | 86.6  | 79.3  | 117.8 | 95.9     | 1 |
| 1 | 158.9 | 108.3 | 76.6  | 84.3  | 103   | 68.9  | 84.6     | 1 |
| 1 | 117.7 | 121.8 | 88.4  | 77.8  | 123.4 | 70.9  | 93.7     | 1 |
| 1 | 94.3  | 85.6  | 96.5  | 109.5 | 84.7  | 129.4 | 103.8333 | 1 |
| 1 | 109.5 | 113.9 | 109.5 | 107   | 80.6  | 79.6  | 101      | 1 |
| 1 | 72.8  | 90.9  | 115.1 | 106.2 | 91.9  | 123   | 109.6667 | 1 |
| 1 | NA       | 0 |
| 1 | 74.4  | 104.2 | 77    | 112   | 135.4 | 96.9  | 92.7     | 1 |
| 1 | 81.9  | 101.6 | 99.4  | 118.1 | 104.9 | 94.1  | 98.36667 | 1 |
| 1 | 103   | 102.7 | 79.1  | 81.1  | 82.1  | 152   | 111.2667 | 1 |
| 1 | 124.8 | 69.9  | 134.4 | 72.8  | 46.7  | 151.4 | 118.5667 | 1 |
| 1 | 111.7 | 109.1 | 82.5  | 91.8  | 133.8 | 71.2  | 87.6     | 1 |
| 1 | 72.6  | 90.7  | 148.9 | 126.7 | 54.1  | 107   | 115.5333 | 1 |
| 1 | 80.2  | 120.5 | 92.3  | 138.2 | 67.1  | 101.6 | 104.8    | 1 |
| 1 | 91.5  | 111.7 | 105.7 | 80.7  | 96.4  | 114   | 110.4667 | 1 |
| 1 | NA       | 0 |
| 1 | 88.4  | 105.8 | 110.3 | 95.6  | 96.2  | 103.7 | 106.6    | 1 |
| 1 | 95.2  | 79.4  | 107.6 | 109.5 | 126.7 | 81.8  | 89.6     | 1 |



|   |       |       |       |       |       |       |          |   |
|---|-------|-------|-------|-------|-------|-------|----------|---|
| 1 | NA       | 0 |
| 1 | 100   | 116.3 | 87    | 90    | 81.4  | 125.3 | 109.5333 | 1 |
| 1 | 89.1  | 73.9  | 137.3 | 127   | 81.3  | 91.4  | 100.8667 | 1 |
| 1 | 75.9  | 72.9  | 104.1 | 139.6 | 77.2  | 130.3 | 102.4333 | 1 |
| 1 | 94.9  | 106.9 | 89    | 105.6 | 74.8  | 128.8 | 108.2333 | 1 |
| 1 | 102.7 | 93.7  | 109.5 | 92.8  | 97    | 104.3 | 102.5    | 1 |
| 1 | 113.5 | 129.8 | 70.2  | 107.7 | 97    | 81.9  | 93.96667 | 1 |
| 1 | 90.4  | 101.8 | 88.2  | 123.1 | 72.4  | 124.2 | 104.7333 | 1 |
| 1 | 88.1  | 80.2  | 133.3 | 93.3  | 95.6  | 109.6 | 107.7    | 1 |
| 1 | 91.8  | 103   | 86.4  | 110.8 | 88.7  | 119.3 | 102.9    | 1 |
| 1 | 69.2  | 81.7  | 107.5 | 96    | 77.6  | 168   | 119.0667 | 1 |
| 1 | 78.9  | 78.8  | 128.9 | 123.5 | 86    | 104   | 103.9    | 1 |
| 1 | 79.6  | 82.3  | 111.1 | 94.1  | 95.6  | 137.3 | 110.2333 | 1 |
| 1 | 68.1  | 132.2 | 97.9  | 96.7  | 76.7  | 128.3 | 119.4667 | 1 |
| 1 | 106.1 | 143.8 | 82.7  | 80.7  | 119.8 | 66.9  | 97.8     | 1 |
| 1 | 79.8  | 106.9 | 102.3 | 112.5 | 106   | 92.5  | 100.5667 | 1 |
| 1 | 95.6  | 92.2  | 103.3 | 100.7 | 100.8 | 107.5 | 101      | 1 |
| 1 | 103.5 | 96    | 88.2  | 140.1 | 89.8  | 82.4  | 88.86667 | 1 |
| 1 | 96.4  | 149.1 | 76.8  | 78    | 126.6 | 73.1  | 99.66667 | 1 |
| 1 | 117.1 | 101   | 88.9  | 98.3  | 95.1  | 99.6  | 96.5     | 1 |
| 1 | 90.7  | 85    | 113.1 | 111.6 | 83.6  | 116.1 | 104.7333 | 1 |
| 1 | 85.8  | 116.9 | 97    | 67    | 150.4 | 83    | 98.96667 | 1 |
| 1 | 96    | 98.3  | 91.4  | 131.3 | 91.3  | 91.6  | 93.76667 | 1 |
| 1 | 96    | 108.1 | 111.6 | 93.1  | 80.1  | 111   | 110.2333 | 1 |
| 1 | 82.3  | 113.4 | 109.7 | 108.6 | 93.4  | 92.6  | 105.2333 | 1 |
| 1 | 90.8  | 149.7 | 75.3  | 73.1  | 129.6 | 81.4  | 102.1333 | 1 |
| 1 | 85.4  | 103.2 | 95.6  | 99.8  | 112.3 | 103.8 | 100.8667 | 1 |
| 1 | 70.2  | 70.9  | 89.4  | 98.1  | 81.6  | 189.8 | 116.7    | 1 |
| 1 | 88.3  | 96.4  | 102.2 | 106.9 | 121.8 | 84.3  | 94.3     | 1 |
| 1 | 113.8 | 101.8 | 84.6  | 94.4  | 94.4  | 111   | 99.13333 | 1 |
| 1 | 134.8 | 88.7  | 62.7  | 110.7 | 153.4 | 49.7  | 67.03333 | 1 |
| 1 | 82.2  | 84.3  | 98.9  | 106.6 | 75.9  | 152.1 | 111.7667 | 1 |
| 1 | 105.9 | 67.1  | 104.3 | 133.3 | 78    | 111.4 | 94.26667 | 1 |
| 1 | 98.7  | 92.2  | 93.4  | 99.2  | 100   | 116.6 | 100.7333 | 1 |
| 1 | 76.1  | 99.3  | 116.7 | 116.7 | 82.8  | 108.4 | 108.1333 | 1 |
| 1 | 90.6  | 95.6  | 118.7 | 96.4  | 100.8 | 97.9  | 104.0667 | 1 |
| 1 | 81    | 99    | 125   | 100.7 | 73.6  | 120.6 | 114.8667 | 1 |
| 1 | 103.4 | 114.7 | 97.4  | 88.6  | 87    | 108.9 | 107      | 1 |
| 1 | 95.3  | 104.6 | 100.8 | 101.6 | 83.5  | 114.2 | 106.5333 | 1 |
| 1 | NA       | 0 |
| 1 | 92.3  | 108.2 | 128.2 | 92.4  | 83.5  | 95.4  | 110.6    | 1 |
| 1 | 92.5  | 89    | 97.1  | 119.8 | 100.9 | 100.7 | 95.6     | 1 |
| 1 | 62.8  | 78.4  | 151   | 142.7 | 76    | 89    | 106.1333 | 1 |
| 1 | 113.3 | 91.8  | 86.6  | 108.7 | 126.3 | 73.2  | 83.86667 | 1 |
| 1 | 73.9  | 143.5 | 100.4 | 105.2 | 95.5  | 81.5  | 108.4667 | 1 |
| 1 | 93.2  | 101.7 | 87.7  | 90.8  | 102.7 | 123.9 | 104.4333 | 1 |
| 1 | 87.1  | 102.2 | 95.3  | 103.7 | 91.6  | 120.1 | 105.8667 | 1 |
| 1 | 97    | 112.6 | 110.5 | 95.8  | 91.5  | 92.5  | 105.2    | 1 |
| 1 | 101.4 | 84.6  | 111.7 | 102   | 95.9  | 104.4 | 100.2333 | 1 |
| 1 | 82.7  | 167   | 55.8  | 82.6  | 125.9 | 86    | 102.9333 | 1 |
| 1 | 146.1 | 99.3  | 72.2  | 91.8  | 135.4 | 55.3  | 75.6     | 1 |

|   |       |       |       |       |       |       |          |   |
|---|-------|-------|-------|-------|-------|-------|----------|---|
| 1 | 96.6  | 81.6  | 118.9 | 95.1  | 94.6  | 113.2 | 104.5667 | 1 |
| 1 | 93.3  | 121.3 | 100.8 | 96.1  | 97.1  | 91.4  | 104.5    | 1 |
| 1 | 126.1 | 99.2  | 107   | 86.8  | 102.5 | 78.3  | 94.83333 | 1 |
| 1 | 99.3  | 92.4  | 109.4 | 95.7  | 95.1  | 108.1 | 103.3    | 1 |
| 1 | 107.3 | 116.3 | 79.8  | 97.5  | 100.4 | 98.7  | 98.26667 | 1 |
| 1 | 87.6  | 81.4  | 119.2 | 103.1 | 83.6  | 125.1 | 108.5667 | 1 |
| 1 | 103.3 | 108.5 | 94.4  | 88.7  | 87.1  | 118.1 | 107      | 1 |
| 1 | 87.8  | 84.7  | 102.5 | 104.2 | 89.4  | 131.4 | 106.2    | 1 |
| 1 | 123.4 | 79.9  | 91    | 112.3 | 88.9  | 104.5 | 91.8     | 1 |
| 1 | 85.1  | 90.4  | 87.2  | 98.3  | 85.4  | 153.5 | 110.3667 | 1 |
| 1 | 73    | 70.9  | 103.6 | 137.3 | 75.3  | 139.8 | 104.7667 | 1 |
| 1 | 85.6  | 89.5  | 103   | 126.5 | 93.7  | 101.6 | 98.03333 | 1 |
| 1 | 69.7  | 76.2  | 156.4 | 132.6 | 71.6  | 93.5  | 108.7    | 1 |
| 1 | 86.1  | 109.9 | 90.2  | 100.5 | 129.8 | 83.5  | 94.53333 | 1 |
| 1 | 81.3  | 93.1  | 106.1 | 130.1 | 86.5  | 102.9 | 100.7    | 1 |
| 1 | 85.3  | 80.7  | 145.5 | 108.9 | 77.3  | 102.4 | 109.5333 | 1 |
| 1 | 69.2  | 68.9  | 162.6 | 110.2 | 90.5  | 98.6  | 110.0333 | 1 |
| 1 | 88.4  | 83.2  | 106.2 | 110.4 | 107.9 | 103.9 | 97.76667 | 1 |
| 1 | 138.5 | 89.9  | 131.2 | 84.2  | 91.9  | 64.3  | 95.13333 | 1 |
| 1 | 65.8  | 70.4  | 105.8 | 103.3 | 81    | 173.6 | 116.6    | 1 |
| 1 | 88.4  | 98.3  | 100.4 | 106   | 86    | 120.9 | 106.5333 | 1 |
| 1 | 113.9 | 127.5 | 81.7  | 74.8  | 97.5  | 104.5 | 104.5667 | 1 |
| 1 | 106.6 | 102.6 | 99.7  | 87.5  | 110.4 | 93.3  | 98.53333 | 1 |
| 1 | NA       | 0 |
| 1 | 58.2  | 86.2  | 156   | 114.6 | 80.3  | 104.8 | 115.6667 | 1 |
| 1 | 65.8  | 61    | 181.9 | 64.3  | 47.8  | 179.2 | 140.7    | 1 |
| 1 | 90.9  | 95.9  | 114.4 | 110.3 | 103.4 | 85    | 98.43333 | 1 |
| 1 | 140.5 | 107.5 | 91.9  | 70.8  | 82.7  | 106.6 | 102      | 1 |
| 1 | 94.8  | 111.5 | 99.1  | 98.6  | 112.9 | 83.1  | 97.9     | 1 |
| 1 | 110.3 | 77.4  | 73.7  | 90.5  | 82    | 166.1 | 105.7333 | 1 |
| 1 | 80.7  | 86.1  | 115.3 | 128.2 | 79.9  | 109.8 | 103.7333 | 1 |
| 1 | 93.1  | 73.3  | 160.3 | 72.8  | 65.5  | 135   | 122.8667 | 1 |
| 1 | 113.8 | 110   | 82.3  | 91.6  | 107.8 | 94.6  | 95.63333 | 1 |
| 1 | 91.2  | 92.9  | 97.1  | 95.2  | 112.6 | 111.1 | 100.3667 | 1 |
| 1 | 97.3  | 116.6 | 99.8  | 86.7  | 113.5 | 86.1  | 100.8333 | 1 |
| 1 | 127.5 | 98.6  | 85.9  | 105   | 112.5 | 70.4  | 84.96667 | 1 |
| 1 | 79.3  | 108.9 | 88.2  | 129.9 | 105.1 | 88.5  | 95.2     | 1 |
| 1 | 113.8 | 141.5 | 92.6  | 81.4  | 81.3  | 89.5  | 107.8667 | 1 |
| 1 | 92.7  | 97.4  | 93    | 101.5 | 101.6 | 113.7 | 101.3667 | 1 |
| 1 | 124.5 | 88.9  | 94.2  | 120   | 92.4  | 80.1  | 87.73333 | 1 |
| 1 | 81.3  | 96.5  | 108.4 | 124   | 77.9  | 111.9 | 105.6    | 1 |
| 1 | 90.2  | 64.4  | 77.1  | 97.9  | 78.7  | 191.8 | 111.1    | 1 |
| 1 | 92.2  | 95.5  | 110.3 | 99.7  | 98.2  | 104.1 | 103.3    | 1 |
| 1 | 75.1  | 66.6  | 120.2 | 147.9 | 100.2 | 90.2  | 92.33333 | 1 |
| 1 | 109.9 | 108.7 | 90    | 89.7  | 85.1  | 116.5 | 105.0667 | 1 |
| 1 | NA       | 0 |
| 1 | 59.5  | 100.3 | 165.7 | 141   | 79.2  | 54.3  | 106.7667 | 1 |
| 1 | 71.3  | 88.9  | 124   | 107.4 | 94.6  | 113.9 | 108.9333 | 1 |
| 1 | 97.8  | 102.7 | 94.7  | 100.1 | 90.8  | 113.8 | 103.7333 | 1 |
| 1 | 98.6  | 90.5  | 130.4 | 106.9 | 93    | 80.6  | 100.5    | 1 |
| 1 | 103.1 | 101.2 | 93.3  | 92.2  | 99.2  | 111.1 | 101.8667 | 1 |

|   |       |       |       |       |       |       |          |   |
|---|-------|-------|-------|-------|-------|-------|----------|---|
| 1 | 68.1  | 73.3  | 120.4 | 116.2 | 75.2  | 146.7 | 113.4667 | 1 |
| 1 | 91.4  | 84.1  | 104.7 | 92.1  | 100.2 | 127.5 | 105.4333 | 1 |
| 1 | 129.8 | 118.5 | 84.2  | 81.7  | 108.4 | 77.5  | 93.4     | 1 |
| 1 | 105.1 | 89.2  | 90.5  | 108.7 | 87.8  | 118.7 | 99.46667 | 1 |
| 1 | 80.8  | 105.1 | 114.9 | 112.6 | 99.3  | 87.3  | 102.4333 | 1 |
| 1 | 93.3  | 106   | 87.8  | 107.4 | 116   | 89.4  | 94.4     | 1 |
| 1 | 133.7 | 212.2 | 53.2  | 59.2  | 59.3  | 82.4  | 115.9333 | 1 |
| 1 | 115.1 | 104.5 | 103.6 | 85    | 86.9  | 104.9 | 104.3333 | 1 |
| 1 | NA       | 0 |
| 1 | 73    | 85.5  | 104.9 | 104   | 96.7  | 136   | 108.8    | 1 |
| 1 | 145.9 | 156.3 | 43.6  | 53.2  | 143.6 | 57.4  | 85.76667 | 1 |
| 1 | 94.7  | 87.3  | 100.7 | 104.2 | 99.8  | 113.4 | 100.4667 | 1 |
| 1 | 93.6  | 103.7 | 91.6  | 107.7 | 94.2  | 109.3 | 101.5333 | 1 |
| 1 | 75    | 80.7  | 119.4 | 91.8  | 92.7  | 140.4 | 113.5    | 1 |
| 1 | 79.8  | 97.4  | 112.2 | 96.6  | 100.8 | 113.2 | 107.6    | 1 |
| 1 | 94    | 75.3  | 99.9  | 137.5 | 99.5  | 93.9  | 89.7     | 1 |
| 1 | NA       | 0 |
| 1 | 87.1  | 82.9  | 116.3 | 117.4 | 87.2  | 109.2 | 102.8    | 1 |
| 1 | 108.1 | 115.9 | 87.7  | 97.6  | 92.3  | 98.4  | 100.6667 | 1 |
| 1 | 119.3 | 112.3 | 102.5 | 77    | 90.6  | 98.3  | 104.3667 | 1 |
| 1 | 64.2  | 78.4  | 120.3 | 112.3 | 89.8  | 135.1 | 111.2667 | 1 |
| 1 | 88.8  | 105.8 | 109.7 | 98.5  | 101.4 | 95.8  | 103.7667 | 1 |
| 1 | 89.8  | 93    | 118.2 | 101.6 | 100.7 | 96.8  | 102.6667 | 1 |
| 1 | 67.4  | 87.2  | 120.6 | 104.9 | 87.5  | 132.5 | 113.4333 | 1 |
| 1 | 113.9 | 85.5  | 119.1 | 93.9  | 86.6  | 101   | 101.8667 | 1 |
| 1 | 64.5  | 71.6  | 160.5 | 104.6 | 84.4  | 114.4 | 115.5    | 1 |
| 1 | 92.7  | 90.2  | 105.2 | 104.3 | 97.5  | 110.1 | 101.8333 | 1 |
| 1 | 74.2  | 92.3  | 124   | 85.4  | 80.4  | 143.7 | 120      | 1 |
| 1 | 82.4  | 80.9  | 110.3 | 98.4  | 81.6  | 146.3 | 112.5    | 1 |
| 1 | 120.6 | 97.7  | 85.3  | 102.3 | 91.2  | 102.8 | 95.26667 | 1 |
| 1 | 94.8  | 91.8  | 98.6  | 105.4 | 93    | 116.3 | 102.2333 | 1 |
| 1 | 86.9  | 97.3  | 98.1  | 108.2 | 86.2  | 123.4 | 106.2667 | 1 |
| 1 | 136.4 | 125.6 | 68.7  | 82.3  | 95.5  | 91.5  | 95.26667 | 1 |
| 1 | 101.1 | 106.8 | 99.7  | 99.3  | 83.7  | 109.4 | 105.3    | 1 |
| 1 | 84.4  | 91.5  | 94.4  | 112.1 | 99    | 118.6 | 101.5    | 1 |
| 1 | 122   | 103.4 | 76.8  | 105   | 74.9  | 118   | 99.4     | 1 |
| 1 | 68.6  | 67.7  | 98.7  | 128.5 | 62.3  | 174.2 | 113.5333 | 1 |
| 1 | 91    | 99.7  | 106.9 | 107.6 | 92    | 102.8 | 103.1333 | 1 |
| 1 | 64.8  | 89.6  | 126   | 89.5  | 89    | 141.2 | 118.9333 | 1 |
| 1 | 110.3 | 137.8 | 90.8  | 68.6  | 87.3  | 105.2 | 111.2667 | 1 |
| 1 | 165.8 | 96.5  | 69.3  | 84.9  | 95.9  | 87.6  | 84.46667 | 1 |
| 1 | 104.5 | 86.8  | 125.9 | 97.8  | 107.4 | 77.7  | 96.8     | 1 |
| 1 | 70.1  | 93    | 138.4 | 108.4 | 85.8  | 104.4 | 111.9333 | 1 |
| 1 | 106.9 | 101.8 | 92.1  | 90.1  | 109.5 | 99.7  | 97.86667 | 1 |
| 1 | 97.3  | 113.1 | 103   | 93    | 102.3 | 91.2  | 102.4333 | 1 |
| 1 | 76.5  | 90.8  | 125.8 | 91.9  | 69.1  | 145.8 | 120.8    | 1 |
| 1 | 91.8  | 113.2 | 100.4 | 100.5 | 96.6  | 97.5  | 103.7    | 1 |
| 1 | 108.3 | 65.2  | 139.8 | 106   | 84.4  | 96.3  | 100.4333 | 1 |
| 1 | 62    | 47.7  | 99.4  | 205.5 | 72.5  | 112.9 | 86.66667 | 1 |
| 1 | 113.1 | 97.1  | 93    | 103.5 | 77.4  | 115.9 | 102      | 1 |
| 1 | 98.2  | 124.7 | 80.8  | 100.4 | 107.4 | 88.6  | 98.03333 | 1 |

|   |       |       |       |       |       |       |          |   |
|---|-------|-------|-------|-------|-------|-------|----------|---|
| 1 | 91.3  | 77.5  | 104.7 | 161.3 | 72.4  | 92.8  | 91.66667 | 1 |
| 1 | 132.8 | 90.5  | 88.8  | 100.6 | 113.6 | 73.7  | 84.33333 | 1 |
| 1 | 102.4 | 94.2  | 90.5  | 104.9 | 108.3 | 99.6  | 94.76667 | 1 |
| 1 | 108.1 | 102.5 | 81.6  | 96    | 131   | 80.8  | 88.3     | 1 |
| 1 | 96.2  | 100.4 | 95.4  | 105.3 | 83.6  | 119.1 | 104.9667 | 1 |
| 1 | 79.2  | 78.7  | 89.5  | 119   | 103.3 | 130.4 | 99.53333 | 1 |
| 1 | 88.2  | 96.1  | 103.5 | 98.1  | 119.1 | 95    | 98.2     | 1 |
| 1 | 98.6  | 93.8  | 104.6 | 106.2 | 81.5  | 115.3 | 104.5667 | 1 |
| 1 | 73.9  | 84.4  | 119   | 94    | 135.7 | 93    | 98.8     | 1 |
| 1 | 198.5 | 136.2 | 38.8  | 79.4  | 48.4  | 98.7  | 91.23333 | 1 |
| 1 | 59.5  | 93.5  | 121.2 | 141.3 | 59.9  | 124.6 | 113.1    | 1 |
| 1 | NA       | 0 |
| 1 | 93.4  | 66.8  | 97.7  | 115.6 | 62.3  | 164.3 | 109.6    | 1 |
| 1 | 128   | 83.2  | 73.2  | 101.8 | 147.5 | 66.3  | 74.23333 | 1 |
| 1 | 91.7  | 76.6  | 113.6 | 103.4 | 80.9  | 133.7 | 107.9667 | 1 |
| 1 | 86.1  | 84.4  | 122.2 | 113.4 | 93.5  | 100.4 | 102.3333 | 1 |
| 1 | 77.2  | 93.2  | 122.5 | 100   | 90.4  | 116.7 | 110.8    | 1 |
| 1 | 77.3  | 87.9  | 104.5 | 92.5  | 81.4  | 156.4 | 116.2667 | 1 |
| 1 | 74.9  | 72.3  | 151.1 | 120.4 | 74    | 107.2 | 110.2    | 1 |
| 1 | 97    | 91    | 94.9  | 110.4 | 119.3 | 87.4  | 91.1     | 1 |
| 1 | 88    | 97.4  | 131.6 | 85.6  | 109.6 | 87.8  | 105.6    | 1 |
| 1 | 172.8 | 111.9 | 64.9  | 67.2  | 108.7 | 74.4  | 83.73333 | 1 |
| 1 | 100.8 | 114.7 | 83.9  | 97.7  | 110.1 | 92.8  | 97.13333 | 1 |
| 1 | 68.5  | 91.9  | 133.4 | 136.1 | 80.3  | 89.9  | 105.0667 | 1 |
| 1 | 64.4  | 79.4  | 161.6 | 111.4 | 102.1 | 81.2  | 107.4    | 1 |
| 1 | 89.9  | 87.9  | 104.7 | 109.4 | 92.1  | 116   | 102.8667 | 1 |
| 1 | 96.2  | 145   | 77.7  | 98.2  | 101.8 | 81    | 101.2333 | 1 |
| 1 | 56.8  | 46.6  | 147.2 | 239.3 | 50.6  | 59.5  | 84.43333 | 1 |
| 1 | 90.1  | 102   | 103.4 | 92.5  | 127.9 | 84.1  | 96.5     | 1 |
| 1 | 87    | 104.1 | 84.5  | 112.7 | 98.8  | 112.8 | 100.4667 | 1 |
| 1 | 92.4  | 102.3 | 84.4  | 99.5  | 95.6  | 125.8 | 104.1667 | 1 |
| 1 | 87.9  | 83.2  | 76.8  | 95.6  | 79    | 177.6 | 112.5333 | 1 |
| 1 | 81.5  | 83.4  | 103.2 | 110.8 | 83.7  | 137.4 | 108      | 1 |
| 1 | 61.1  | 53.6  | 116.4 | 96.3  | 157.1 | 115.6 | 95.2     | 1 |
| 1 | 93.5  | 108.7 | 93    | 97.6  | 110.7 | 96.4  | 99.36667 | 1 |
| 1 | 115.8 | 106.1 | 81.8  | 89.1  | 93    | 114.3 | 100.7333 | 1 |
| 1 | 76.8  | 80.6  | 136.6 | 97.8  | 85.2  | 123   | 113.4    | 1 |
| 1 | 75.1  | 72.6  | 163.6 | 126.4 | 64.5  | 97.8  | 111.3333 | 1 |
| 1 | 79    | 73.8  | 103.3 | 101   | 95.7  | 147.3 | 108.1333 | 1 |
| 1 | 94.8  | 92.2  | 101.7 | 91.8  | 81.4  | 138.1 | 110.6667 | 1 |
| 1 | 87.5  | 82    | 111.2 | 117.1 | 92.9  | 109.2 | 100.8    | 1 |
| 1 | 90.9  | 96.4  | 85.2  | 106.2 | 102.4 | 118.9 | 100.1667 | 1 |
| 1 | 101.4 | 108.9 | 101.2 | 111.6 | 82.4  | 94.4  | 101.5    | 1 |
| 1 | 74.5  | 84.5  | 106.1 | 131.6 | 88.4  | 114.9 | 101.8333 | 1 |
| 1 | 103.9 | 88.4  | 104.2 | 94.3  | 101.3 | 107.8 | 100.1333 | 1 |
| 1 | 109.4 | 94.3  | 79    | 87.5  | 81.6  | 148.2 | 107.1667 | 1 |
| 1 | 100   | 91.3  | 72.8  | 155.8 | 87.2  | 92.9  | 85.66667 | 1 |
| 1 | 95.7  | 90.2  | 125.4 | 88.9  | 92.4  | 107.5 | 107.7    | 1 |
| 1 | 90    | 95.9  | 103.3 | 107.8 | 103   | 99.9  | 99.7     | 1 |
| 1 | 106.4 | 107.8 | 83.4  | 93.6  | 106.3 | 102.5 | 97.9     | 1 |
| 1 | 91.2  | 118.4 | 122   | 84.7  | 80.6  | 103.2 | 114.5333 | 1 |

|      |       |       |       |       |       |       |          |   |
|------|-------|-------|-------|-------|-------|-------|----------|---|
| 1    | 97.2  | 100   | 105.7 | 89.6  | 110.5 | 96.9  | 100.8667 | 1 |
| 1    | 96.9  | 96.1  | 108.7 | 100.1 | 93.3  | 104.9 | 103.2333 | 1 |
| 1 NA | NA    | NA    | NA    | NA    | NA    | NA    | NA       | 0 |
| 1    | 93.5  | 139.2 | 100.6 | 72.1  | 103.2 | 91.5  | 110.4333 | 1 |
| 1    | 90.8  | 66.6  | 141.6 | 110.9 | 94.8  | 95.3  | 101.1667 | 1 |
| 1    | 81.2  | 88.3  | 110.3 | 127.8 | 87.7  | 104.8 | 101.1333 | 1 |
| 1    | 89    | 89.1  | 97.3  | 123.1 | 104.1 | 97.5  | 94.63333 | 1 |
| 1    | 91.8  | 83.1  | 112.2 | 102.2 | 116.6 | 94.2  | 96.5     | 1 |
| 1    | 74.3  | 77.1  | 113.4 | 111.7 | 102.9 | 120.6 | 103.7    | 1 |
| 1    | 63.7  | 79.2  | 215.4 | 94    | 72.2  | 75.5  | 123.3667 | 1 |
| 1    | 70.3  | 89.2  | 105.8 | 104.9 | 109.8 | 120   | 105      | 1 |
| 1    | 65.5  | 76.2  | 111.8 | 110.6 | 68.7  | 167.2 | 118.4    | 1 |
| 1    | 65.7  | 65.5  | 136.6 | 163.4 | 69.5  | 99.3  | 100.4667 | 1 |
| 1    | 92.9  | 101.2 | 110.3 | 118.2 | 83.6  | 93.9  | 101.8    | 1 |
| 1    | 139   | 95.1  | 87.7  | 97.5  | 103.1 | 77.6  | 86.8     | 1 |
| 1    | 114   | 87.8  | 99.7  | 112   | 90.7  | 95.9  | 94.46667 | 1 |
| 1    | 116.8 | 71.6  | 100   | 115.7 | 108.5 | 87.5  | 86.36667 | 1 |
| 1    | 80.8  | 74.3  | 111.5 | 89.3  | 81.9  | 162.1 | 115.9667 | 1 |
| 1 NA | NA    | NA    | NA    | NA    | NA    | NA    | NA       | 0 |
| 1    | 62.9  | 96.2  | 118.5 | 132.3 | 63    | 127   | 113.9    | 1 |
| 1    | 85.2  | 81.8  | 97.9  | 99.8  | 117.9 | 117.4 | 99.03333 | 1 |
| 1    | 106.4 | 136.4 | 88.8  | 70.3  | 122.8 | 75.2  | 100.1333 | 1 |
| 1    | 81.4  | 124.9 | 90.9  | 88.4  | 84.2  | 130.3 | 115.3667 | 1 |
| 1    | 78.3  | 74.4  | 125.5 | 113.1 | 81.7  | 127   | 108.9667 | 1 |
| 1    | 111.7 | 175.2 | 67    | 72.4  | 109.6 | 64.1  | 102.1    | 1 |
| 1    | 94.1  | 97    | 112.6 | 100.1 | 92.7  | 103.4 | 104.3333 | 1 |
| 1    | 83.6  | 76.5  | 125.8 | 112.4 | 80.3  | 121.3 | 107.8667 | 1 |
| 1    | 108.6 | 98.4  | 88.6  | 94.2  | 120.6 | 89.6  | 92.2     | 1 |
| 1    | 102.6 | 94.3  | 96.7  | 109.4 | 89.3  | 107.7 | 99.56667 | 1 |
| 1    | 79.8  | 101.4 | 99.6  | 100   | 104.1 | 115.1 | 105.3667 | 1 |
| 1    | 120.9 | 161.4 | 110.4 | 63.2  | 103   | 41    | 104.2667 | 1 |
| 1    | 108.5 | 110.6 | 90.7  | 86.3  | 95.6  | 108.3 | 103.2    | 1 |
| 1    | 90.2  | 79.6  | 107.7 | 99.9  | 86.8  | 135.8 | 107.7    | 1 |
| 1    | 103.6 | 97    | 103.1 | 110.4 | 83.8  | 102.1 | 100.7333 | 1 |
| 1    | 94.9  | 132.2 | 112.1 | 95.3  | 96.3  | 69.2  | 104.5    | 1 |
| 1 NA | NA    | NA    | NA    | NA    | NA    | NA    | NA       | 0 |
| 1 NA | NA    | NA    | NA    | NA    | NA    | NA    | NA       | 0 |
| 1 NA | NA    | NA    | NA    | NA    | NA    | NA    | NA       | 0 |
| 1    | 99.5  | 93.8  | 110.3 | 93.3  | 85.6  | 117.5 | 107.2    | 1 |
| 1    | 89.3  | 108.6 | 93.2  | 105.1 | 106.2 | 97.6  | 99.8     | 1 |
| 1    | 131.5 | 112.8 | 88.4  | 96.6  | 102.1 | 68.6  | 89.93333 | 1 |
| 1    | 80.2  | 88.7  | 123.4 | 104.5 | 111.3 | 91.9  | 101.3333 | 1 |
| 1    | 85.2  | 80.6  | 108.7 | 111   | 80    | 134.6 | 107.9667 | 1 |
| 1    | 56.1  | 91.1  | 92.2  | 123.6 | 81.5  | 155.6 | 112.9667 | 1 |
| 1    | 92.2  | 85.3  | 102.5 | 105.8 | 112.5 | 101.7 | 96.5     | 1 |
| 1    | 77    | 94.3  | 114.4 | 111.8 | 106.3 | 96.2  | 101.6333 | 1 |
| 1    | 106.6 | 115.2 | 94.3  | 89.7  | 111.8 | 82.4  | 97.3     | 1 |
| 1    | 64.3  | 81.5  | 115.2 | 109   | 80.2  | 149.8 | 115.5    | 1 |
| 1    | 58.9  | 77.3  | 152.6 | 109.5 | 80.3  | 121.5 | 117.1333 | 1 |
| 1    | 60.5  | 79.5  | 87.4  | 110.1 | 106.2 | 156.4 | 107.7667 | 1 |
| 1    | 83.9  | 84.8  | 97.5  | 91.1  | 87.2  | 155.4 | 112.5667 | 1 |

|   |       |       |       |       |       |       |          |   |
|---|-------|-------|-------|-------|-------|-------|----------|---|
| 1 | 64.3  | 109.4 | 117.8 | 152.9 | 78.2  | 77.5  | 101.5667 | 1 |
| 1 | 97.1  | 104.1 | 98.8  | 92.5  | 115.9 | 91.6  | 98.16667 | 1 |
| 1 | 85.3  | 88.5  | 139.4 | 103.7 | 95.5  | 87.6  | 105.1667 | 1 |
| 1 | 92.6  | 99    | 99    | 97.2  | 84.4  | 127.8 | 108.6    | 1 |
| 1 | 72.8  | 88.3  | 117.7 | 110.5 | 68.5  | 142.2 | 116.0667 | 1 |
| 1 | 75.8  | 69.2  | 130.5 | 120.1 | 78.7  | 125.6 | 108.4333 | 1 |
| 1 | 107.5 | 105.4 | 90.1  | 92.9  | 98.5  | 105.6 | 100.3667 | 1 |
| 1 | 100.7 | 106.2 | 82.8  | 89.5  | 107.3 | 113.5 | 100.8333 | 1 |
| 1 | 98    | 95.4  | 94.9  | 97.8  | 93.4  | 120.5 | 103.6    | 1 |
| 1 | 101.7 | 88.2  | 111.2 | 118.6 | 88.1  | 92.2  | 97.2     | 1 |
| 1 | 74    | 84.5  | 116.7 | 126.4 | 76.9  | 121.5 | 107.5667 | 1 |
| 1 | 104.6 | 95.2  | 83.5  | 122.4 | 102   | 92.3  | 90.33333 | 1 |
| 1 | 90.8  | 113.2 | 102.3 | 84.1  | 77.2  | 132.4 | 115.9667 | 1 |
| 1 | 109.8 | 89    | 90.8  | 103.5 | 108.3 | 98.6  | 92.8     | 1 |
| 1 | 58.3  | 93.4  | 128.6 | 93.2  | 68.5  | 158.1 | 126.7    | 1 |
| 1 | 97.3  | 86.1  | 99.2  | 103.1 | 81.8  | 132.6 | 105.9667 | 1 |
| 1 | 77.2  | 104.7 | 118.8 | 138.9 | 63.8  | 96.6  | 106.7    | 1 |
| 1 | 85.1  | 81    | 135.9 | 106.7 | 75.1  | 116.1 | 111      | 1 |
| 1 | 94    | 86.5  | 92.5  | 110.9 | 101.9 | 114.2 | 97.73333 | 1 |
| 1 | 84.4  | 118.6 | 120.3 | 74.8  | 81.8  | 120.2 | 119.7    | 1 |
| 1 | 116.5 | 106.6 | 88.1  | 96.9  | 89.5  | 102.4 | 99.03333 | 1 |
| 1 | 94.6  | 102.5 | 83.5  | 96.5  | 94.1  | 128.8 | 104.9333 | 1 |
| 1 | 92.7  | 95.7  | 100.2 | 104.8 | 100.1 | 106.6 | 100.8333 | 1 |
| 1 | 99.2  | 101.7 | 93    | 103.8 | 103   | 99.3  | 98       | 1 |
| 1 | 99.6  | 82.7  | 72.2  | 107.4 | 98.2  | 140   | 98.3     | 1 |
| 1 | NA       | 0 |
| 1 | 104.1 | 135.9 | 72.7  | 113.5 | 90.2  | 83.7  | 97.43333 | 1 |
| 1 | 79.1  | 85.6  | 95.1  | 129.7 | 107.2 | 103.3 | 94.66667 | 1 |
| 1 | 109.5 | 129.6 | 74.4  | 81.2  | 100.5 | 104.8 | 102.9333 | 1 |
| 1 | 71    | 57.3  | 153   | 105.8 | 115.9 | 97    | 102.4333 | 1 |
| 1 | 116.6 | 116.3 | 91.9  | 92.3  | 95.4  | 87.6  | 98.6     | 1 |
| 1 | 93.7  | 87.2  | 92.3  | 108.8 | 116.2 | 101.8 | 93.76667 | 1 |
| 1 | 116.5 | 105.5 | 89.6  | 96.9  | 110.7 | 80.8  | 91.96667 | 1 |
| 1 | 98.9  | 86.5  | 89.5  | 115.3 | 90.8  | 118.9 | 98.3     | 1 |
| 1 | 114.5 | 92.8  | 107.3 | 93.6  | 90.8  | 101   | 100.3667 | 1 |
| 1 | 69.7  | 79.8  | 94.5  | 167.2 | 102.3 | 86.5  | 86.93333 | 1 |
| 1 | 92.7  | 100.3 | 109.3 | 115.7 | 98.5  | 83.5  | 97.7     | 1 |
| 1 | 88.4  | 112.5 | 87.4  | 80.1  | 125   | 106.6 | 102.1667 | 1 |
| 1 | NA       | 0 |
| 1 | 77.7  | 98.5  | 114   | 97.5  | 92.5  | 119.7 | 110.7333 | 1 |
| 1 | 90    | 109.1 | 116.4 | 100.2 | 84.3  | 100.1 | 108.5333 | 1 |
| 1 | 90.2  | 89.8  | 103.1 | 98.8  | 96.8  | 121.3 | 104.7333 | 1 |
| 1 | 90.5  | 102.1 | 80    | 80.1  | 147.8 | 99.6  | 93.9     | 1 |
| 1 | 94    | 86    | 100.4 | 110.6 | 95.3  | 113.6 | 100      | 1 |
| 1 | 78.9  | 85.3  | 113.7 | 111.2 | 89.4  | 121.5 | 106.8333 | 1 |
| 1 | 86.4  | 97.2  | 125.6 | 98.2  | 85.7  | 106.7 | 109.8333 | 1 |
| 1 | 64.5  | 98.4  | 98.8  | 119.4 | 123.3 | 95.7  | 97.63333 | 1 |
| 1 | 119.6 | 98.1  | 97.5  | 85.4  | 110.1 | 89.3  | 94.96667 | 1 |
| 1 | 89.9  | 101.9 | 106.9 | 101.5 | 95.4  | 104.4 | 104.4    | 1 |
| 1 | 107.2 | 113.9 | 100   | 93.1  | 105   | 81    | 98.3     | 1 |
| 1 | 96.4  | 94.6  | 86.3  | 118.8 | 101   | 103   | 94.63333 | 1 |

|   |       |       |       |       |       |       |          |   |
|---|-------|-------|-------|-------|-------|-------|----------|---|
| 1 | 101.1 | 97.3  | 101.5 | 92.2  | 87.3  | 120.6 | 106.4667 | 1 |
| 1 | 81.8  | 89.6  | 134.6 | 91.7  | 67.8  | 134.4 | 119.5333 | 1 |
| 1 | 76.1  | 92.3  | 118.2 | 101   | 82.5  | 129.9 | 113.4667 | 1 |
| 1 | 102.5 | 79.1  | 105.8 | 121.9 | 109.2 | 81.5  | 88.8     | 1 |
| 1 | 99.6  | 117.9 | 92.3  | 99.2  | 106.7 | 84.3  | 98.16667 | 1 |
| 1 | 77.7  | 79.3  | 90    | 126   | 102.5 | 124.5 | 97.93333 | 1 |
| 1 | 86.4  | 94.7  | 101.1 | 105.3 | 91.5  | 121   | 105.6    | 1 |
| 1 | 92.2  | 98.3  | 110.2 | 99.4  | 74.7  | 125.3 | 111.2667 | 1 |
| 1 | 113.9 | 84.1  | 81.4  | 108.3 | 90.4  | 121.8 | 95.76667 | 1 |
| 1 | 98.1  | 98    | 107.6 | 97    | 104   | 95.2  | 100.2667 | 1 |
| 1 | 92.2  | 92.4  | 107.7 | 101.8 | 88.7  | 117.3 | 105.8    | 1 |
| 1 | 117.5 | 104.6 | 102.2 | 114   | 99.1  | 62.5  | 89.76667 | 1 |
| 1 | 86.3  | 114   | 93.8  | 104.8 | 88.5  | 112.7 | 106.8333 | 1 |
| 1 | 122.5 | 101.4 | 84.8  | 87.2  | 111.6 | 92.4  | 92.86667 | 1 |
| 1 | 115.1 | 110.1 | 102.8 | 78.6  | 109.7 | 83.6  | 98.83333 | 1 |
| 1 | 86.6  | 91.7  | 120   | 84.4  | 82    | 135.3 | 115.6667 | 1 |
| 1 | 95.8  | 88.6  | 108.5 | 107.2 | 94.9  | 105.1 | 100.7333 | 1 |
| 1 | NA       | 0 |
| 1 | 89.4  | 146.5 | 75.9  | 84.3  | 104.6 | 99.3  | 107.2333 | 1 |
| 1 | 83.5  | 90    | 98.9  | 96    | 92.5  | 139.1 | 109.3333 | 1 |
| 1 | 85.3  | 110.3 | 93.3  | 101.9 | 92    | 117.3 | 106.9667 | 1 |
| 1 | 87.1  | 110.5 | 113.8 | 94.5  | 90.1  | 104.1 | 109.4667 | 1 |
| 1 | 114.4 | 96.7  | 104.3 | 87.7  | 105.5 | 91.3  | 97.43333 | 1 |
| 1 | 122.7 | 62    | 112.7 | 109.9 | 50.4  | 142.3 | 105.6667 | 1 |
| 1 | 102.7 | 95.2  | 105.7 | 81.3  | 94.8  | 120.3 | 107.0667 | 1 |
| 1 | 96.6  | 90.1  | 107.3 | 103.7 | 84.4  | 118.1 | 105.1667 | 1 |
| 1 | 88.9  | 85.2  | 96.1  | 127.1 | 105.2 | 97.5  | 92.93333 | 1 |
| 1 | 87.3  | 74.1  | 136.4 | 125.8 | 93.1  | 83.3  | 97.93333 | 1 |
| 1 | 94.6  | 103.4 | 103.6 | 95.7  | 89.4  | 113.3 | 106.7667 | 1 |
| 1 | 107.8 | 116.7 | 93.7  | 94.5  | 87.4  | 99.9  | 103.4333 | 1 |
| 1 | 108   | 92.9  | 66.1  | 101.3 | 177.8 | 53.9  | 70.96667 | 1 |
| 1 | 100.7 | 78.4  | 125   | 97.5  | 84.2  | 114.2 | 105.8667 | 1 |
| 1 | NA       | 0 |
| 1 | 77.1  | 78.2  | 109.2 | 107.7 | 92.6  | 135.2 | 107.5333 | 1 |
| 1 | 79.1  | 102.2 | 93.2  | 108.2 | 77.6  | 139.7 | 111.7    | 1 |
| 1 | 78.4  | 88.5  | 99.9  | 98.5  | 84.4  | 150.4 | 112.9333 | 1 |
| 1 | 134.7 | 88    | 73.2  | 110.7 | 146.8 | 46.6  | 69.26667 | 1 |
| 1 | 99.7  | 89.2  | 99.2  | 95.6  | 126   | 90.3  | 92.9     | 1 |
| 1 | 79.4  | 63.7  | 117.2 | 136.9 | 89.3  | 113.4 | 98.1     | 1 |
| 1 | 113.2 | 98.9  | 99.6  | 93.2  | 94    | 101.2 | 99.9     | 1 |
| 1 | 99.8  | 88    | 95.6  | 118.5 | 112.3 | 85.7  | 89.76667 | 1 |
| 1 | 78.9  | 92.5  | 101.9 | 91.3  | 146.2 | 89.3  | 94.56667 | 1 |
| 1 | 96.9  | 119.7 | 97.7  | 88.5  | 105.4 | 91.8  | 103.0667 | 1 |
| 1 | 89.2  | 83.3  | 87.3  | 94.1  | 75.8  | 170.2 | 113.6    | 1 |
| 1 | 83.3  | 104.2 | 93.4  | 112.4 | 81.1  | 125.7 | 107.7667 | 1 |
| 1 | 60.9  | 80.3  | 118.7 | 112.7 | 122.8 | 104.7 | 101.2333 | 1 |
| 1 | 99.4  | 112.3 | 88.3  | 91.8  | 107.1 | 101.1 | 100.5667 | 1 |
| 1 | 64.7  | 152.1 | 70.4  | 121.1 | 79.7  | 111.9 | 111.4667 | 1 |
| 1 | 95.3  | 89.8  | 100.2 | 112.6 | 95.5  | 106.6 | 98.86667 | 1 |
| 1 | 90.6  | 79.1  | 105.8 | 107.5 | 99.7  | 117.3 | 100.7333 | 1 |
| 1 | 61.3  | 86.6  | 81.4  | 142.5 | 95.1  | 133.1 | 100.3667 | 1 |

|      |       |       |       |       |       |       |          |   |
|------|-------|-------|-------|-------|-------|-------|----------|---|
| 1    | 92    | 73.7  | 106.3 | 103.7 | 112.2 | 112.1 | 97.36667 | 1 |
| 1 NA | NA    | NA    | NA    | NA    | NA    | NA    | NA       | 0 |
| 1    | 113.4 | 81.7  | 91.8  | 105.3 | 100.6 | 107.2 | 93.56667 | 1 |
| 1    | 104.7 | 103.6 | 100.7 | 99.9  | 104.8 | 86.3  | 96.86667 | 1 |
| 1    | 127.6 | 107.2 | 85.4  | 92.2  | 108.5 | 79.1  | 90.56667 | 1 |
| 1    | 63    | 83.8  | 104.3 | 107.1 | 89.7  | 152.1 | 113.4    | 1 |
| 1    | 91.8  | 108.4 | 98.9  | 113.4 | 88.2  | 99.4  | 102.2333 | 1 |
| 1    | 113.5 | 106.5 | 96    | 89.6  | 90.9  | 103.5 | 102      | 1 |
| 1    | 113.1 | 102.5 | 95.6  | 82.3  | 125.6 | 81    | 93.03333 | 1 |
| 1    | 78.1  | 83.3  | 91.2  | 146.8 | 114.8 | 85.8  | 86.76667 | 1 |
| 1 NA | NA    | NA    | NA    | NA    | NA    | NA    | NA       | 0 |
| 1    | 98.1  | 91.5  | 84.6  | 92.7  | 100.7 | 132.4 | 102.8333 | 1 |
| 1    | 72.4  | 64    | 102.8 | 141.9 | 94.7  | 124.2 | 97       | 1 |
| 1    | 114.6 | 108.2 | 80.3  | 88.1  | 115.1 | 93.7  | 94.06667 | 1 |
| 1    | 89.7  | 93.5  | 109.4 | 109.4 | 94.1  | 103.9 | 102.2667 | 1 |
| 1    | 75.7  | 83.2  | 61    | 187.2 | 61.4  | 131.3 | 91.83333 | 1 |
| 1 NA | NA    | NA    | NA    | NA    | NA    | NA    | NA       | 0 |
| 1    | 118.9 | 118.5 | 88.7  | 88.4  | 104.9 | 80.6  | 95.93333 | 1 |
| 1    | 120.8 | 76.9  | 106.7 | 81.6  | 126.1 | 87.9  | 90.5     | 1 |
| 1    | 91.1  | 117.6 | 105.5 | 96.5  | 79.8  | 109.5 | 110.8667 | 1 |
| 1    | 95.1  | 117.2 | 107.1 | 91.1  | 122.6 | 66.9  | 97.06667 | 1 |
| 1    | 89.1  | 85.5  | 106.4 | 92.3  | 91.9  | 134.8 | 108.9    | 1 |
| 1    | 75.3  | 78.7  | 127.6 | 122.2 | 65.1  | 131.1 | 112.4667 | 1 |
| 1    | 93.5  | 114.2 | 91.2  | 121.7 | 90.1  | 89.2  | 98.2     | 1 |
| 1    | 118.9 | 96.1  | 83.1  | 87.9  | 100.2 | 113.8 | 97.66667 | 1 |
| 1    | 117.6 | 106.9 | 96.3  | 91.9  | 100.9 | 86.4  | 96.53333 | 1 |
| 1    | 99.8  | 97.8  | 100.8 | 114.6 | 83.1  | 103.8 | 100.8    | 1 |
| 1    | 109.4 | 116.8 | 120.4 | 89.2  | 88.9  | 75.4  | 104.2    | 1 |
| 1    | 62.1  | 82.6  | 116.5 | 185.6 | 66.8  | 86.3  | 95.13333 | 1 |
| 1    | 83.7  | 120.7 | 109.9 | 92    | 75.7  | 118.1 | 116.2333 | 1 |
| 1    | 105   | 142.7 | 100.1 | 65.4  | 101   | 85.9  | 109.5667 | 1 |
| 1    | 101   | 83.9  | 135.1 | 87.1  | 84.2  | 108.7 | 109.2333 | 1 |
| 1    | 87.4  | 101.5 | 89.4  | 101.7 | 129.3 | 90.6  | 93.83333 | 1 |
| 1 NA | NA    | NA    | NA    | NA    | NA    | NA    | NA       | 0 |
| 1 NA | NA    | NA    | NA    | NA    | NA    | NA    | NA       | 0 |
| 1    | 92.3  | 85.7  | 118   | 120   | 96.1  | 87.9  | 97.2     | 1 |
| 1    | 82.4  | 83.4  | 99    | 141.8 | 84.1  | 109.2 | 97.2     | 1 |
| 1    | 104   | 130.7 | 96.4  | 89.8  | 77.3  | 101.8 | 109.6333 | 1 |
| 1    | 105.1 | 140.7 | 96.6  | 74.2  | 113.5 | 69.9  | 102.4    | 1 |
| 1    | 76.2  | 87.3  | 172.2 | 71.1  | 77.8  | 115.3 | 124.9333 | 1 |
| 1    | 57.8  | 104.4 | 141.2 | 134.6 | 73.2  | 88.9  | 111.5    | 1 |
| 1    | 76.7  | 75.9  | 183.8 | 88.9  | 109.4 | 65.3  | 108.3333 | 1 |
| 1    | 86.5  | 117.5 | 102.6 | 80    | 98.2  | 115.3 | 111.8    | 1 |
| 1    | 93.2  | 91.8  | 105.3 | 95.2  | 82.4  | 132.2 | 109.7667 | 1 |
| 1    | 114   | 94.4  | 129.2 | 73.1  | 121.7 | 67.6  | 97.06667 | 1 |
| 1    | 109   | 96.3  | 116.2 | 91.1  | 102.2 | 85.2  | 99.23333 | 1 |
| 1    | 70    | 79    | 114.9 | 109.6 | 85.4  | 141.2 | 111.7    | 1 |
| 1    | 103.1 | 121   | 82.4  | 94.2  | 84.8  | 114.6 | 106      | 1 |
| 1    | 81    | 81.3  | 71.9  | 213.9 | 82.8  | 69.1  | 74.1     | 1 |
| 1    | 103.8 | 108.7 | 94.9  | 95.5  | 118   | 79.1  | 94.23333 | 1 |
| 1    | 55.3  | 51.7  | 62.8  | 65.8  | 49.4  | 315   | 143.1667 | 1 |



|   |       |       |       |       |       |       |          |   |
|---|-------|-------|-------|-------|-------|-------|----------|---|
| 1 | 97.8  | 100.7 | 113   | 92.8  | 90.4  | 105.3 | 106.3333 | 1 |
| 1 | 97.1  | 89    | 95.3  | 105.6 | 96    | 117   | 100.4333 | 1 |
| 1 | NA       | 0 |
| 1 | 76.2  | 85.9  | 117.6 | 91    | 90.6  | 138.9 | 114.1333 | 1 |
| 1 | 69.2  | 66.3  | 153.7 | 82.4  | 75.9  | 152.6 | 124.2    | 1 |
| 1 | 92.1  | 90.3  | 115.4 | 99.2  | 109   | 94    | 99.9     | 1 |
| 1 | 87.3  | 64.9  | 113.3 | 90    | 80.1  | 164.4 | 114.2    | 1 |
| 1 | 93.2  | 99    | 96.3  | 107.5 | 106   | 98    | 97.76667 | 1 |
| 1 | 92.1  | 106   | 199.3 | 51.8  | 112.6 | 38.2  | 114.5    | 1 |
| 1 | 121.7 | 98.6  | 101.6 | 89.9  | 91    | 97.2  | 99.13333 | 1 |
| 1 | 98.5  | 123.5 | 76.1  | 94.3  | 98.5  | 109   | 102.8667 | 1 |
| 1 | 152.3 | 75.9  | 82.3  | 90.5  | 129.8 | 69.3  | 75.83333 | 1 |
| 1 | NA       | 0 |
| 1 | 77.4  | 106.3 | 120.5 | 97.7  | 107.9 | 90.3  | 105.7    | 1 |
| 1 | 85.4  | 91.4  | 125.5 | 125   | 88.1  | 84.6  | 100.5    | 1 |
| 1 | 88.3  | 102.9 | 109.1 | 108.9 | 72.9  | 118   | 110      | 1 |
| 1 | 85    | 93.2  | 113.7 | 101   | 89.4  | 117.7 | 108.2    | 1 |
| 1 | 120.4 | 103.6 | 99.8  | 99.1  | 99.8  | 77.3  | 93.56667 | 1 |
| 1 | 72.8  | 97.6  | 102.6 | 145.2 | 81.5  | 100.3 | 100.1667 | 1 |
| 1 | 110.7 | 100.2 | 96.9  | 98.7  | 84.8  | 108.7 | 101.9333 | 1 |
| 1 | 107.2 | 84.3  | 100   | 110.1 | 76.8  | 121.6 | 101.9667 | 1 |
| 1 | 92.8  | 81.5  | 127.5 | 102.7 | 105.8 | 89.7  | 99.56667 | 1 |
| 1 | 93.7  | 106   | 99.6  | 96.7  | 95.1  | 108.7 | 104.7667 | 1 |
| 1 | 86.1  | 84.4  | 100.8 | 93.7  | 101   | 134   | 106.4    | 1 |
| 1 | 122.5 | 92.7  | 95.5  | 96.4  | 99.6  | 93.2  | 93.8     | 1 |
| 1 | 85.1  | 94.8  | 103.2 | 102.3 | 117.9 | 96.8  | 98.26667 | 1 |
| 1 | NA       | 0 |
| 1 | 74.1  | 94    | 115.9 | 99.4  | 103.1 | 113.5 | 107.8    | 1 |
| 1 | 85.5  | 87.8  | 102.9 | 120   | 87    | 116.8 | 102.5    | 1 |
| 1 | 152   | 155.2 | 47.6  | 59.7  | 137.3 | 48.2  | 83.66667 | 1 |
| 1 | 163.8 | 86    | 86.9  | 88.2  | 114   | 61.1  | 78       | 1 |
| 1 | NA       | 0 |
| 1 | 92.6  | 180.4 | 39.6  | 40.7  | 199.2 | 47.4  | 89.13333 | 1 |
| 1 | 62.7  | 82.5  | 117.5 | 120   | 84.9  | 132.3 | 110.7667 | 1 |
| 1 | NA       | 0 |
| 1 | 95.4  | 165.2 | 66.2  | 65.7  | 126.1 | 81.3  | 104.2333 | 1 |
| 1 | 79.6  | 80.3  | 129.8 | 132   | 88.8  | 89.5  | 99.86667 | 1 |
| 1 | 65.2  | 79.4  | 102   | 101.8 | 83    | 168.5 | 116.6333 | 1 |
| 1 | 95.2  | 82.5  | 109.4 | 100.7 | 94.3  | 117.9 | 103.2667 | 1 |
| 1 | 125.4 | 118.5 | 65.9  | 70.8  | 125.6 | 93.9  | 92.76667 | 1 |
| 1 | 100.4 | 105.7 | 91    | 101.7 | 91.9  | 109.2 | 101.9667 | 1 |
| 1 | 81.3  | 70.7  | 127.9 | 96.9  | 94    | 129.2 | 109.2667 | 1 |
| 1 | 96.8  | 82.1  | 107.3 | 108.7 | 99.5  | 105.5 | 98.3     | 1 |
| 1 | 99.3  | 110.8 | 108.4 | 94    | 87.7  | 99.8  | 106.3333 | 1 |
| 1 | 97.3  | 97.4  | 104.5 | 90.3  | 85.6  | 124.9 | 108.9333 | 1 |
| 1 | 78.2  | 85.1  | 121.4 | 109.5 | 80.8  | 125   | 110.5    | 1 |
| 1 | 122.6 | 91    | 76.2  | 98.2  | 148.8 | 63    | 76.73333 | 1 |
| 1 | 93.5  | 87.2  | 102.7 | 110.6 | 116.4 | 89.6  | 93.16667 | 1 |
| 1 | 94.2  | 111.2 | 104.9 | 90.2  | 89.9  | 109.7 | 108.6    | 1 |
| 1 | 74    | 88.4  | 116.2 | 66.3  | 91.1  | 164   | 122.8667 | 1 |
| 1 | 81.8  | 92.1  | 87.3  | 122.8 | 90.8  | 125.3 | 101.5667 | 1 |

|   |       |       |       |       |       |       |          |   |
|---|-------|-------|-------|-------|-------|-------|----------|---|
| 1 | 108.7 | 92.2  | 86.8  | 118.3 | 91.3  | 102.6 | 93.86667 | 1 |
| 1 | NA       | 0 |
| 1 | 86.8  | 107.9 | 111.8 | 115.9 | 99.3  | 78.3  | 99.33333 | 1 |
| 1 | 87.3  | 103.5 | 91.4  | 112.3 | 87.5  | 118   | 104.3    | 1 |
| 1 | 80.5  | 92.8  | 68.8  | 143.5 | 117.2 | 97.3  | 86.3     | 1 |
| 1 | 88.7  | 91.1  | 101.1 | 107.4 | 80.7  | 131   | 107.7333 | 1 |
| 1 | 78    | 102.3 | 94.5  | 107.4 | 85    | 132.7 | 109.8333 | 1 |
| 1 | 146.7 | 119.8 | 89.7  | 76.8  | 90.4  | 76.6  | 95.36667 | 1 |
| 1 | 69.8  | 70.4  | 123.9 | 109.7 | 87.2  | 139   | 111.1    | 1 |
| 1 | 110.2 | 99.2  | 93.9  | 94.8  | 100.7 | 101.2 | 98.1     | 1 |
| 1 | 105.1 | 106.4 | 95.1  | 93.5  | 97.3  | 102.6 | 101.3667 | 1 |
| 1 | 107.3 | 126.2 | 82    | 100.4 | 82.4  | 101.7 | 103.3    | 1 |
| 1 | 96.8  | 94.8  | 104.3 | 118.4 | 80.2  | 105.5 | 101.5333 | 1 |
| 1 | 87.5  | 85.9  | 101.9 | 119.2 | 84.7  | 120.7 | 102.8333 | 1 |
| 1 | 72.4  | 90.3  | 120.9 | 129.3 | 75.7  | 111.4 | 107.5333 | 1 |
| 1 | 86.9  | 102.9 | 107.1 | 92.3  | 99.8  | 111.1 | 107.0333 | 1 |
| 1 | 93.7  | 86.1  | 109.5 | 105.1 | 80.3  | 125.4 | 107      | 1 |
| 1 | 81.8  | 92.1  | 107.8 | 119.1 | 95.3  | 104   | 101.3    | 1 |
| 1 | 56.6  | 74.6  | 134.3 | 110.9 | 74.9  | 148.6 | 119.1667 | 1 |
| 1 | 103.5 | 126.3 | 69.7  | 88.2  | 143.7 | 68.6  | 88.2     | 1 |
| 1 | 130.6 | 103   | 92.7  | 93.6  | 94.1  | 86    | 93.9     | 1 |
| 1 | 94    | 140.4 | 86.6  | 110.3 | 95.2  | 73.4  | 100.1333 | 1 |
| 1 | 71.7  | 90.9  | 128.6 | 110.6 | 66.3  | 131.9 | 117.1333 | 1 |
| 1 | 82.8  | 136.5 | 113.8 | 107.5 | 86.6  | 72.9  | 107.7333 | 1 |
| 1 | 96.2  | 102.1 | 112.5 | 96.8  | 100.3 | 92    | 102.2    | 1 |
| 1 | 90.1  | 135.3 | 111   | 89.5  | 74.2  | 99.9  | 115.4    | 1 |
| 1 | 97.8  | 106.5 | 74.2  | 86.8  | 102.8 | 131.9 | 104.2    | 1 |
| 1 | 85.6  | 109.8 | 113.7 | 91.7  | 116   | 83.2  | 102.2333 | 1 |
| 1 | 123.9 | 113.8 | 82.4  | 82.2  | 100.7 | 97.1  | 97.76667 | 1 |
| 1 | 93.6  | 87.9  | 95.9  | 93.2  | 83.1  | 146.4 | 110.0667 | 1 |
| 1 | 120.5 | 106.5 | 86.3  | 87.9  | 98.3  | 100.5 | 97.76667 | 1 |
| 1 | 79.8  | 111.9 | 120.2 | 92.5  | 79.7  | 115.9 | 116      | 1 |
| 1 | 89.5  | 79.8  | 98    | 116.5 | 96.5  | 119.7 | 99.16667 | 1 |
| 1 | 72.7  | 67.1  | 119.4 | 108.4 | 73.4  | 159.1 | 115.2    | 1 |
| 1 | 64    | 74    | 130.5 | 142   | 64.3  | 125.1 | 109.8667 | 1 |
| 1 | 112.1 | 110.6 | 90    | 89    | 92.1  | 106.3 | 102.3    | 1 |
| 1 | 103.8 | 92.6  | 82.9  | 111   | 116.7 | 93.1  | 89.53333 | 1 |
| 1 | 98.5  | 121.9 | 59.5  | 73.2  | 172.7 | 74    | 85.13333 | 1 |
| 1 | NA       | 0 |
| 1 | 70.9  | 75.2  | 146.5 | 147.6 | 67    | 92.8  | 104.8333 | 1 |
| 1 | 78.2  | 131.1 | 85.9  | 82.7  | 130.2 | 91.9  | 102.9667 | 1 |
| 1 | 76.4  | 68    | 126.3 | 147.4 | 74.4  | 107.6 | 100.6333 | 1 |
| 1 | 89.1  | 93.2  | 113.8 | 105.6 | 92.9  | 105.4 | 104.1333 | 1 |
| 1 | 88.3  | 192.3 | 105.8 | 62.2  | 97.4  | 53.9  | 117.3333 | 1 |
| 1 | 76.6  | 94.9  | 120.4 | 100.7 | 100.6 | 106.8 | 107.3667 | 1 |
| 1 | 62.5  | 72.8  | 132.2 | 63.2  | 61    | 208.4 | 137.8    | 1 |
| 1 | 93    | 97.5  | 92.3  | 101.4 | 94.5  | 121.3 | 103.7    | 1 |
| 1 | 97    | 92.6  | 90    | 103.6 | 107.5 | 109.3 | 97.3     | 1 |
| 1 | 82.9  | 98.5  | 81.2  | 109.7 | 98    | 129.7 | 103.1333 | 1 |
| 1 | NA       | 0 |
| 1 | 107.4 | 112.9 | 89.8  | 102.4 | 101.8 | 85.7  | 96.13333 | 1 |

|      |       |       |       |       |       |       |          |   |
|------|-------|-------|-------|-------|-------|-------|----------|---|
| 1    | 97.2  | 64.3  | 129.3 | 114.7 | 83.5  | 110.9 | 101.5    | 1 |
| 1    | 89.4  | 71.5  | 79.4  | 136   | 120.3 | 103.4 | 84.76667 | 1 |
| 1    | 94.2  | 95.3  | 107.8 | 94.9  | 73.2  | 134.7 | 112.6    | 1 |
| 1    | 101.7 | 116   | 102.1 | 86.3  | 86.3  | 107.7 | 108.6    | 1 |
| 1    | 82.4  | 90.3  | 111.9 | 132.7 | 97.9  | 84.8  | 95.66667 | 1 |
| 1    | 80.3  | 115.4 | 115.2 | 101   | 94.5  | 93.6  | 108.0667 | 1 |
| 1    | 69    | 105.5 | 76.6  | 104.1 | 110.3 | 134.4 | 105.5    | 1 |
| 1    | 57.7  | 73.6  | 178.2 | 76.8  | 81.4  | 132.4 | 128.0667 | 1 |
| 1    | 44    | 117.7 | 89.2  | 202.7 | 80.7  | 65.8  | 90.9     | 1 |
| 1    | 85.7  | 93    | 96.3  | 75.5  | 85.7  | 163.8 | 117.7    | 1 |
| 1    | 82.7  | 88.7  | 130.7 | 117.9 | 74.5  | 105.5 | 108.3    | 1 |
| 1    | 106.3 | 116.8 | 89.6  | 78    | 101.6 | 107.6 | 104.6667 | 1 |
| 1    | 114.8 | 91.6  | 105.4 | 97.5  | 91.1  | 99.7  | 98.9     | 1 |
| 1    | 86.7  | 80.9  | 104.1 | 103.6 | 86.2  | 138.6 | 107.8667 | 1 |
| 1    | 147.9 | 105.2 | 127.2 | 97.7  | 86.2  | 35.9  | 89.43333 | 1 |
| 1    | 87.3  | 85.6  | 98.5  | 119.3 | 94.3  | 115   | 99.7     | 1 |
| 1    | 102.7 | 83.3  | 72.7  | 149.9 | 113   | 78.3  | 78.1     | 1 |
| 1    | 112.4 | 84.9  | 93.6  | 115.4 | 96.7  | 97    | 91.83333 | 1 |
| 1    | 75.5  | 65.8  | 94    | 57.5  | 65.1  | 242.2 | 134      | 1 |
| 1    | 88.3  | 121.8 | 104.6 | 86.5  | 95.7  | 103   | 109.8    | 1 |
| 1    | 66.9  | 96.9  | 104.7 | 207.8 | 58.3  | 65.3  | 88.96667 | 1 |
| 1    | 78.3  | 98.5  | 120.9 | 111   | 106.1 | 85.2  | 101.5333 | 1 |
| 1    | 114.7 | 100.9 | 89.8  | 98.9  | 99.7  | 96    | 95.56667 | 1 |
| 1    | 62.6  | 114.4 | 127.6 | 94.2  | 79.6  | 121.6 | 121.2    | 1 |
| 1    | 130.7 | 120   | 74    | 77.5  | 129.3 | 68.4  | 87.46667 | 1 |
| 1    | 86.9  | 91.6  | 111.6 | 112.1 | 106   | 91.8  | 98.33333 | 1 |
| 1    | 108.1 | 101   | 77    | 114.2 | 72.5  | 127.2 | 101.7333 | 1 |
| 1    | 111   | 103.2 | 90.9  | 92.8  | 112.4 | 89.8  | 94.63333 | 1 |
| 1    | 90.3  | 76.7  | 95.8  | 112.8 | 109.6 | 114.7 | 95.73333 | 1 |
| 1    | 110.5 | 149.4 | 73.4  | 88.3  | 124.5 | 53.9  | 92.23333 | 1 |
| 1 NA | NA    | NA    | NA    | NA    | NA    | NA    | NA       | 0 |
| 1    | 88    | 102   | 87.7  | 104.3 | 92.4  | 125.6 | 105.1    | 1 |
| 1    | 83    | 92.5  | 132.6 | 84.4  | 84.7  | 122.8 | 115.9667 | 1 |
| 1    | 73.7  | 67.7  | 120.2 | 128.4 | 82.1  | 127.9 | 105.2667 | 1 |
| 1    | 106.8 | 94.3  | 96.8  | 93    | 108.4 | 100.7 | 97.26667 | 1 |
| 1    | 88.3  | 103.3 | 42.5  | 161.9 | 59.3  | 144.8 | 96.86667 | 1 |
| 1    | 58.9  | 118.4 | 119.1 | 138.2 | 75.1  | 90.2  | 109.2333 | 1 |
| 1    | 74.7  | 69.6  | 102.5 | 88.5  | 69.4  | 195.3 | 122.4667 | 1 |
| 1 NA | NA    | NA    | NA    | NA    | NA    | NA    | NA       | 0 |
| 1    | 73.5  | 80.2  | 128   | 107.6 | 76.9  | 133.8 | 114      | 1 |
| 1 NA | NA    | NA    | NA    | NA    | NA    | NA    | NA       | 0 |
| 1    | 100.8 | 107.4 | 83.6  | 96.6  | 106.1 | 105.4 | 98.8     | 1 |
| 1    | 80.2  | 80.9  | 105.8 | 112.9 | 75.2  | 145   | 110.5667 | 1 |
| 1    | 76.6  | 111.5 | 126.6 | 104.7 | 89.1  | 91.4  | 109.8333 | 1 |
| 1    | 79    | 95.9  | 90.7  | 112.5 | 93.1  | 128.8 | 105.1333 | 1 |
| 1 NA | NA    | NA    | NA    | NA    | NA    | NA    | NA       | 0 |
| 1    | 71.7  | 74.8  | 125.6 | 100.1 | 79.1  | 148.6 | 116.3333 | 1 |
| 1    | 28.4  | 30.6  | 423.7 | 43.1  | 30.9  | 43.3  | 165.8667 | 1 |
| 1    | 88.2  | 98.3  | 98.1  | 105.7 | 97.4  | 112.3 | 102.9    | 1 |
| 1    | 181.4 | 112.8 | 79.1  | 70.4  | 80.2  | 76.1  | 89.33333 | 1 |
| 1    | 90.1  | 89.7  | 105.5 | 89.7  | 95.5  | 129.4 | 108.2    | 1 |

|      |       |       |       |       |       |       |          |   |
|------|-------|-------|-------|-------|-------|-------|----------|---|
| 1    | 90.1  | 90.8  | 108.8 | 107.9 | 86.3  | 116.1 | 105.2333 | 1 |
| 1    | 96.5  | 108.4 | 85.1  | 90.1  | 97.3  | 122.6 | 105.3667 | 1 |
| 1 NA | NA    | NA    | NA    | NA    | NA    | NA    | NA       | 0 |
| 1 NA | NA    | NA    | NA    | NA    | NA    | NA    | NA       | 0 |
| 1    | 121.9 | 108.8 | 85.3  | 84.7  | 108.9 | 90.4  | 94.83333 | 1 |
| 1    | 111.7 | 78.9  | 98.2  | 92.7  | 118.2 | 100.2 | 92.43333 | 1 |
| 1    | 111.9 | 87.1  | 104   | 105.8 | 101.8 | 89.4  | 93.5     | 1 |
| 1    | 123   | 95.3  | 94.9  | 95.9  | 95.9  | 95.1  | 95.1     | 1 |
| 1    | 77.6  | 77.1  | 146.9 | 106.9 | 89    | 102.6 | 108.8667 | 1 |
| 1    | 75.1  | 77.7  | 110.3 | 102.2 | 97.5  | 137.2 | 108.4    | 1 |
| 1 NA | NA    | NA    | NA    | NA    | NA    | NA    | NA       | 0 |
| 1    | 50.6  | 149.3 | 39.9  | 126.2 | 35.4  | 198.6 | 129.2667 | 1 |
| 1    | 81.9  | 101.9 | 99.6  | 98.3  | 101   | 117.3 | 106.2667 | 1 |
| 1 NA | NA    | NA    | NA    | NA    | NA    | NA    | NA       | 0 |
| 1    | 46    | 51.4  | 233.4 | 143.2 | 56.1  | 69.8  | 118.2    | 1 |
| 1    | 80    | 82.7  | 128.4 | 123   | 78.4  | 107.5 | 106.2    | 1 |
| 1    | 79.5  | 107.9 | 108.2 | 95.8  | 95.1  | 113.5 | 109.8667 | 1 |
| 1    | 110.5 | 105.4 | 94.4  | 91.4  | 108.3 | 90    | 96.6     | 1 |
| 1    | 73    | 92    | 106.5 | 123.6 | 69.8  | 135.2 | 111.2333 | 1 |
| 1    | 106.7 | 92.3  | 98.7  | 98.2  | 100   | 104.1 | 98.36667 | 1 |
| 1    | 99.6  | 109.8 | 98.2  | 79.4  | 83.3  | 129.6 | 112.5333 | 1 |
| 1    | 79    | 84.5  | 112.7 | 110.4 | 96.8  | 116.6 | 104.6    | 1 |
| 1    | 130.2 | 91    | 93.5  | 86.8  | 101.5 | 96.9  | 93.8     | 1 |
| 1    | 94.9  | 108.8 | 91.8  | 104.4 | 101   | 99    | 99.86667 | 1 |
| 1    | 112.6 | 122.9 | 81.1  | 94.4  | 107.9 | 81.2  | 95.06667 | 1 |
| 1 NA | NA    | NA    | NA    | NA    | NA    | NA    | NA       | 0 |
| 1    | 64.6  | 132.8 | 90.6  | 141.3 | 84.3  | 86.3  | 103.2333 | 1 |
| 1    | 94.6  | 78.8  | 119.9 | 104.2 | 95    | 107.5 | 102.0667 | 1 |
| 1    | 94.7  | 110.4 | 84.3  | 105   | 102.1 | 103.4 | 99.36667 | 1 |
| 1    | 100.4 | 106.8 | 105   | 91.6  | 106   | 90.4  | 100.7333 | 1 |
| 1    | 92.8  | 101.7 | 101.9 | 101.8 | 89.5  | 112.2 | 105.2667 | 1 |
| 1    | 119.5 | 102.6 | 81.6  | 93.4  | 101.4 | 101.4 | 95.2     | 1 |
| 1    | 111.8 | 118.6 | 94.2  | 89.1  | 95.1  | 91.2  | 101.3333 | 1 |
| 1    | 103.3 | 103.3 | 94    | 99.2  | 112.1 | 88.1  | 95.13333 | 1 |
| 1    | 126.1 | 119   | 58.1  | 70.6  | 96.6  | 129.6 | 102.2333 | 1 |
| 1    | 90.1  | 90.4  | 105.4 | 104.3 | 88.9  | 120.8 | 105.5333 | 1 |
| 1    | 92.7  | 95.4  | 100.7 | 95.4  | 102.4 | 113.4 | 103.1667 | 1 |
| 1    | 84    | 97.8  | 156.7 | 83.1  | 111.3 | 67    | 107.1667 | 1 |
| 1    | 94.3  | 111.8 | 92.6  | 102.2 | 99.4  | 99.7  | 101.3667 | 1 |
| 1    | 95.8  | 95.9  | 80    | 127.6 | 115.4 | 85.3  | 87.06667 | 1 |
| 1    | 65.7  | 78.4  | 127.6 | 109   | 84.7  | 134.4 | 113.4667 | 1 |
| 1    | 93.1  | 119.7 | 93    | 88.9  | 97.8  | 107.5 | 106.7333 | 1 |
| 1    | 91.4  | 101.3 | 96.9  | 100.1 | 96    | 114.3 | 104.1667 | 1 |
| 1    | 115.8 | 91.6  | 88.9  | 100.2 | 110.2 | 93.4  | 91.3     | 1 |
| 1    | 94.6  | 86.7  | 99.4  | 119   | 81    | 119.3 | 101.8    | 1 |
| 1    | 84.2  | 80.6  | 104.2 | 97.2  | 103.3 | 130.5 | 105.1    | 1 |
| 1    | 95.7  | 95.3  | 103.4 | 112.3 | 84.8  | 108.5 | 102.4    | 1 |
| 1    | 60.2  | 101.5 | 92.4  | 146.8 | 96.3  | 102.8 | 98.9     | 1 |
| 1    | 92.8  | 89.2  | 106.5 | 151.6 | 78.9  | 81    | 92.23333 | 1 |
| 1    | 107.3 | 112   | 89.1  | 93.4  | 102.7 | 95.4  | 98.83333 | 1 |
| 1    | 97.8  | 98.5  | 96.2  | 114.5 | 104.7 | 88.4  | 94.36667 | 1 |

|   |       |       |       |       |       |       |          |   |
|---|-------|-------|-------|-------|-------|-------|----------|---|
| 1 | 90.7  | 74.1  | 94.9  | 128.5 | 118.9 | 92.9  | 87.3     | 1 |
| 1 | 115.5 | 101   | 92.3  | 97.1  | 110.5 | 83.6  | 92.3     | 1 |
| 1 | 103.1 | 111.5 | 93.5  | 92.3  | 106   | 93.7  | 99.56667 | 1 |
| 1 | 142.9 | 100.6 | 63.1  | 121.2 | 86    | 86.2  | 83.3     | 1 |
| 1 | 111.6 | 95.7  | 98.3  | 106.7 | 108.8 | 78.9  | 90.96667 | 1 |
| 1 | 102.4 | 93.9  | 110.7 | 95.2  | 96.3  | 101.5 | 102.0333 | 1 |
| 1 | 105.6 | 85.6  | 82.7  | 117.6 | 128.6 | 80    | 82.76667 | 1 |
| 1 | 61    | 68.3  | 132.5 | 118.3 | 89.1  | 130.8 | 110.5333 | 1 |
| 1 | 74.1  | 92.9  | 100.3 | 101.6 | 115.3 | 115.7 | 102.9667 | 1 |
| 1 | 87.2  | 88.5  | 92.9  | 100.4 | 82    | 149.1 | 110.1667 | 1 |
| 1 | 95.4  | 90.1  | 95.2  | 99.3  | 110.9 | 109.1 | 98.13333 | 1 |
| 1 | 77.8  | 90.5  | 108.3 | 112.9 | 84.6  | 125.9 | 108.2333 | 1 |
| 1 | 148.6 | 85.4  | 77.2  | 103.4 | 101.7 | 83.7  | 82.1     | 1 |
| 1 | 103.1 | 87.9  | 109.4 | 109.6 | 89.7  | 100.3 | 99.2     | 1 |
| 1 | 73.7  | 84.6  | 101.4 | 150.5 | 81.6  | 108.2 | 98.06667 | 1 |
| 1 | 106.6 | 86.3  | 85    | 113.4 | 80.9  | 127.8 | 99.7     | 1 |
| 1 | 95.6  | 92.9  | 116.9 | 110.9 | 91.2  | 92.6  | 100.8    | 1 |
| 1 | 113.1 | 110.5 | 96.2  | 86    | 120.4 | 73.9  | 93.53333 | 1 |
| 1 | 93.5  | 93.9  | 91.1  | 113.2 | 88.1  | 120.3 | 101.7667 | 1 |
| 1 | 137.6 | 100.4 | 90.4  | 81.1  | 88.8  | 101.7 | 97.5     | 1 |
| 1 | 83.6  | 80.6  | 99.7  | 128.9 | 91.5  | 115.7 | 98.66667 | 1 |
| 1 | 89.8  | 80.7  | 104.7 | 103.9 | 109.7 | 111.2 | 98.86667 | 1 |
| 1 | 72.3  | 109.3 | 98.5  | 120.7 | 88.1  | 111   | 106.2667 | 1 |
| 1 | 85.8  | 105.1 | 100.1 | 105.8 | 97.4  | 105.8 | 103.6667 | 1 |
| 1 | 90.2  | 87.2  | 112.4 | 112.4 | 77.3  | 120.5 | 106.7    | 1 |
| 1 | 74.8  | 99.2  | 127.6 | 96    | 93.1  | 109.5 | 112.1    | 1 |
| 1 | 121.2 | 89.9  | 93.1  | 101.1 | 107.6 | 87.1  | 90.03333 | 1 |
| 1 | 92.6  | 102.9 | 109.8 | 87.8  | 99.8  | 107   | 106.5667 | 1 |
| 1 | 90.8  | 87.4  | 94.9  | 114.1 | 109.4 | 103.4 | 95.23333 | 1 |
| 1 | 95.3  | 102.4 | 88.3  | 88.1  | 124.4 | 101.5 | 97.4     | 1 |
| 1 | 80.3  | 86.8  | 183.3 | 92.2  | 85.4  | 71.9  | 114      | 1 |
| 1 | 111.7 | 113.3 | 89.1  | 81    | 93.5  | 111.4 | 104.6    | 1 |
| 1 | 76.4  | 162.8 | 83.7  | 95.6  | 83.7  | 97.8  | 114.7667 | 1 |
| 1 | 94.3  | 79.7  | 126.7 | 103.6 | 91    | 104.7 | 103.7    | 1 |
| 1 | NA       | 0 |
| 1 | 128.5 | 85.4  | 65.1  | 54.7  | 148.2 | 118   | 89.5     | 1 |
| 1 | 57.6  | 90.8  | 72.2  | 127.3 | 114.7 | 137.6 | 100.2    | 1 |
| 1 | 112.2 | 81.3  | 114.4 | 99.1  | 87.6  | 105.4 | 100.3667 | 1 |
| 1 | 131.5 | 87.7  | 83.2  | 103.7 | 106.5 | 87.4  | 86.1     | 1 |
| 1 | 72.3  | 79.5  | 98.7  | 110.4 | 77.6  | 161.5 | 113.2333 | 1 |
| 1 | 131.1 | 90.1  | 110.7 | 92.3  | 93.1  | 82.8  | 94.53333 | 1 |
| 1 | 96.7  | 87.1  | 97.5  | 100   | 79.6  | 139   | 107.8667 | 1 |
| 1 | 79.7  | 91.5  | 144.7 | 93.6  | 74    | 116.6 | 117.6    | 1 |
| 1 | 99.4  | 88.2  | 92    | 112   | 92.7  | 115.8 | 98.66667 | 1 |
| 1 | 101.4 | 128.2 | 91.4  | 82.8  | 118.5 | 77.7  | 99.1     | 1 |
| 1 | 95.7  | 82.6  | 122   | 120.4 | 90.3  | 89    | 97.86667 | 1 |
| 1 | 96.3  | 98    | 92.2  | 92.7  | 107.4 | 113.5 | 101.2333 | 1 |
| 1 | 84.7  | 117.7 | 100.7 | 98    | 112.2 | 86.8  | 101.7333 | 1 |
| 1 | NA       | 0 |
| 1 | 118.1 | 119.4 | 76.4  | 79.7  | 128   | 78.5  | 91.43333 | 1 |
| 1 | 71.9  | 112   | 102.8 | 97.4  | 97    | 119   | 111.2667 | 1 |

|   |       |       |       |       |       |       |          |   |
|---|-------|-------|-------|-------|-------|-------|----------|---|
| 1 | 65.1  | 113.1 | 51.5  | 144.6 | 61.7  | 164   | 109.5333 | 1 |
| 1 | 67    | 107.1 | 87    | 139.4 | 81.5  | 117.9 | 104      | 1 |
| 1 | 89.3  | 91.4  | 106.6 | 123.1 | 84.2  | 105.5 | 101.1667 | 1 |
| 1 | 149.1 | 95.9  | 67.3  | 96.8  | 130.5 | 60.5  | 74.56667 | 1 |
| 1 | 106.3 | 86.6  | 98.8  | 83.5  | 108.8 | 116.1 | 100.5    | 1 |
| 1 | 110.6 | 97.1  | 91    | 93.1  | 107.3 | 100.9 | 96.33333 | 1 |
| 1 | NA       | 0 |
| 1 | 120   | 83.1  | 96.5  | 104.1 | 94.6  | 101.8 | 93.8     | 1 |
| 1 | NA       | 0 |
| 1 | 121.7 | 92    | 74.9  | 105.9 | 115   | 90.5  | 85.8     | 1 |
| 1 | 108.1 | 103.7 | 72    | 96.6  | 94    | 125.7 | 100.4667 | 1 |
| 1 | 88.5  | 81.5  | 100.2 | 102.8 | 81.7  | 145.3 | 109      | 1 |
| 1 | 88.7  | 105.6 | 101.9 | 70    | 132.5 | 101.4 | 102.9667 | 1 |
| 1 | NA       | 0 |
| 1 | 119.1 | 98.9  | 98.6  | 88.4  | 90.7  | 104.5 | 100.6667 | 1 |
| 1 | 113.7 | 129.9 | 100.6 | 76    | 102.8 | 77    | 102.5    | 1 |
| 1 | 90.7  | 93.2  | 100.8 | 114.8 | 105.8 | 94.7  | 96.23333 | 1 |
| 1 | 89.3  | 82.3  | 173.2 | 87.4  | 79.3  | 88.4  | 114.6333 | 1 |
| 1 | 100   | 107.4 | 114.6 | 79.3  | 84.4  | 114.3 | 112.1    | 1 |
| 1 | 95    | 69.8  | 145.4 | 99.6  | 88.2  | 102.1 | 105.7667 | 1 |
| 1 | 106.1 | 87    | 105.7 | 117.3 | 94.9  | 89    | 93.9     | 1 |
| 1 | 75.9  | 75.9  | 119   | 102.3 | 84.2  | 142.7 | 112.5333 | 1 |
| 1 | 103.1 | 88.9  | 97.8  | 122.9 | 74.4  | 112.9 | 99.86667 | 1 |
| 1 | NA       | 0 |
| 1 | 91    | 111.7 | 137.3 | 80.9  | 78    | 101.1 | 116.7    | 1 |
| 1 | 82.1  | 80.7  | 104.9 | 111.7 | 105.2 | 115.3 | 100.3    | 1 |
| 1 | 53.9  | 90.1  | 117   | 105.3 | 107.4 | 126.3 | 111.1333 | 1 |
| 1 | 142.8 | 120.9 | 76.8  | 77.5  | 115.2 | 66.8  | 88.16667 | 1 |
| 1 | 98.3  | 102.9 | 85.5  | 93    | 97.9  | 122.4 | 103.6    | 1 |
| 1 | 84.9  | 94.5  | 92.5  | 106.8 | 80.5  | 140.9 | 109.3    | 1 |
| 1 | 65.3  | 66.9  | 129.5 | 114.8 | 82.3  | 141.2 | 112.5333 | 1 |
| 1 | 64.2  | 79    | 122.4 | 111.2 | 72    | 151.1 | 117.5    | 1 |
| 1 | 106.8 | 100.7 | 92.8  | 97    | 93.8  | 108.9 | 100.8    | 1 |
| 1 | 118.3 | 134.6 | 64.7  | 96.9  | 86    | 99.6  | 99.63333 | 1 |
| 1 | 94.3  | 99.3  | 96.5  | 89.1  | 86.8  | 134   | 109.9333 | 1 |
| 1 | 93.7  | 85.9  | 121.5 | 102.5 | 93.2  | 103.4 | 103.6    | 1 |
| 1 | 128.5 | 97.9  | 93    | 92.3  | 100.1 | 88.2  | 93.03333 | 1 |
| 1 | 70.9  | 86.8  | 91    | 103.8 | 95.4  | 152.1 | 109.9667 | 1 |
| 1 | 78    | 88.5  | 115.2 | 105.6 | 84.1  | 128.6 | 110.7667 | 1 |
| 1 | 69.1  | 77.6  | 113.1 | 108.9 | 130.1 | 101.2 | 97.3     | 1 |
| 1 | 91.6  | 102   | 100.5 | 100.2 | 95    | 110.7 | 104.4    | 1 |
| 1 | 107.7 | 130.2 | 78.5  | 101.3 | 80.5  | 101.8 | 103.5    | 1 |
| 1 | 78.1  | 76.6  | 86    | 200.3 | 73.7  | 85.3  | 82.63333 | 1 |
| 1 | 91.8  | 105.7 | 98.9  | 98    | 113.2 | 92.3  | 98.96667 | 1 |
| 1 | 80.2  | 103.6 | 105.2 | 101.4 | 89.5  | 120.1 | 109.6333 | 1 |
| 1 | 73.1  | 96    | 115.1 | 120.8 | 70.4  | 124.6 | 111.9    | 1 |
| 1 | 91.6  | 99.5  | 99.4  | 110.9 | 101   | 97.6  | 98.83333 | 1 |
| 1 | 51    | 98.8  | 91.4  | 63.5  | 72.1  | 223.3 | 137.8333 | 1 |
| 1 | 67.7  | 71.3  | 121.8 | 104.9 | 104.3 | 129.9 | 107.6667 | 1 |
| 1 | 83.9  | 100.1 | 152.1 | 92.9  | 76.3  | 94.7  | 115.6333 | 1 |
| 1 | 87.5  | 107   | 101.7 | 95.8  | 81.1  | 127   | 111.9    | 1 |

|   |       |       |       |       |       |       |          |   |
|---|-------|-------|-------|-------|-------|-------|----------|---|
| 1 | 95.7  | 170.1 | 84.3  | 86.6  | 84.7  | 78.5  | 110.9667 | 1 |
| 1 | 84.9  | 92.3  | 109.4 | 119.3 | 91.5  | 102.7 | 101.4667 | 1 |
| 1 | 79.2  | 118.1 | 85.8  | 89.3  | 91.5  | 136.1 | 113.3333 | 1 |
| 1 | 81.7  | 106.4 | 103.4 | 102.9 | 82.2  | 123.4 | 111.0667 | 1 |
| 1 | 50.8  | 78.6  | 162.9 | 89.3  | 65.2  | 153.2 | 131.5667 | 1 |
| 1 | NA       | 0 |
| 1 | 108.7 | 106.2 | 88.6  | 93.1  | 105.9 | 97.6  | 97.46667 | 1 |
| 1 | NA       | 0 |
| 1 | 74.4  | 92.9  | 140.4 | 87.5  | 94.1  | 110.6 | 114.6333 | 1 |
| 1 | 110.3 | 147.4 | 76.1  | 79.6  | 111.2 | 75.4  | 99.63333 | 1 |
| 1 | 89.2  | 82.2  | 110.5 | 113.5 | 83.4  | 121.1 | 104.6    | 1 |
| 1 | 94    | 105.8 | 107   | 91.3  | 113.6 | 88.4  | 100.4    | 1 |
| 1 | 91.9  | 81.3  | 100.7 | 106.2 | 125.8 | 94.1  | 92.03333 | 1 |
| 1 | 62.5  | 69.9  | 128.4 | 109.9 | 90.2  | 139   | 112.4333 | 1 |
| 1 | 79.5  | 104.2 | 112.7 | 120.7 | 102.3 | 80.7  | 99.2     | 1 |
| 1 | 98.9  | 108.7 | 113.7 | 92.6  | 96.8  | 89.3  | 103.9    | 1 |
| 1 | 103.6 | 84.3  | 101.9 | 113.6 | 106.6 | 90    | 92.06667 | 1 |
| 1 | 81.8  | 86.3  | 113.2 | 110.1 | 101.2 | 107.3 | 102.2667 | 1 |
| 1 | 77.1  | 87.7  | 177.4 | 72.6  | 62.3  | 123   | 129.3667 | 1 |
| 1 | 102.1 | 102.8 | 112.2 | 93.3  | 97.4  | 92.3  | 102.4333 | 1 |
| 1 | 69    | 65.3  | 164.2 | 83.2  | 75.3  | 142.9 | 124.1333 | 1 |
| 1 | 100.9 | 121.7 | 95.5  | 94.3  | 97.9  | 89.6  | 102.2667 | 1 |
| 1 | 186.4 | 124.6 | 53.7  | 55.8  | 132   | 47.5  | 75.26667 | 1 |
| 1 | 102   | 101.6 | 92.3  | 104.9 | 131.7 | 67.6  | 87.16667 | 1 |
| 1 | 83.7  | 71.6  | 113.5 | 113.5 | 77.8  | 139.9 | 108.3333 | 1 |
| 1 | 101.1 | 98.7  | 100.8 | 105.2 | 108.5 | 85.7  | 95.06667 | 1 |
| 1 | 86.7  | 89.6  | 110.8 | 118.8 | 97.2  | 96.8  | 99.06667 | 1 |
| 1 | 94.2  | 98.4  | 108.6 | 98.7  | 99.9  | 100.3 | 102.4333 | 1 |
| 1 | 68.7  | 79.3  | 131   | 116.9 | 83.6  | 120.6 | 110.3    | 1 |
| 1 | 79.2  | 100.1 | 106.4 | 90    | 77.2  | 147.2 | 117.9    | 1 |
| 1 | 92.7  | 119.5 | 99.8  | 95.6  | 96.4  | 96    | 105.1    | 1 |
| 1 | 88.7  | 108   | 91.4  | 103.3 | 105.2 | 103.4 | 100.9333 | 1 |
| 1 | 79.4  | 87.2  | 107.9 | 102.8 | 97.1  | 125.7 | 106.9333 | 1 |
| 1 | 76.1  | 80.7  | 115.7 | 124.9 | 77    | 125.6 | 107.3333 | 1 |
| 1 | 82    | 94.9  | 105.1 | 101   | 108.7 | 108.3 | 102.7667 | 1 |
| 1 | 60.7  | 123   | 115   | 92.8  | 88.7  | 119.9 | 119.3    | 1 |
| 1 | 89    | 142.8 | 119.8 | 55.4  | 155.1 | 37.9  | 100.1667 | 1 |
| 1 | NA       | 0 |
| 1 | 67.5  | 81.3  | 124.9 | 112.2 | 96.6  | 117.6 | 107.9333 | 1 |
| 1 | 85    | 81.2  | 99.8  | 122   | 104   | 108   | 96.33333 | 1 |
| 1 | 125.4 | 118.6 | 75.6  | 78.6  | 114.5 | 87.4  | 93.86667 | 1 |
| 1 | 78.9  | 87.1  | 106.2 | 111.2 | 77.1  | 139.6 | 110.9667 | 1 |
| 1 | 73.4  | 86.1  | 117.2 | 100   | 93    | 130.4 | 111.2333 | 1 |
| 1 | 74.1  | 83.4  | 205.3 | 89.6  | 74.2  | 73.4  | 120.7    | 1 |
| 1 | 122   | 96.2  | 85.7  | 94.6  | 110.2 | 91.3  | 91.06667 | 1 |
| 1 | 103   | 109.2 | 91.3  | 85.6  | 90.4  | 120.6 | 107.0333 | 1 |
| 1 | 88.4  | 61.5  | 183.2 | 87.8  | 86.2  | 93    | 112.5667 | 1 |
| 1 | 103.8 | 98.4  | 92.9  | 101.8 | 114.9 | 88.3  | 93.2     | 1 |
| 1 | 88.5  | 90.8  | 84.1  | 106.6 | 99.4  | 130.6 | 101.8333 | 1 |
| 1 | 123.4 | 88    | 83.1  | 111.2 | 94.9  | 99.3  | 90.13333 | 1 |
| 1 | 116   | 77.9  | 120.8 | 102.5 | 110.4 | 72.5  | 90.4     | 1 |

|   |       |       |       |       |       |       |          |   |
|---|-------|-------|-------|-------|-------|-------|----------|---|
| 1 | 95.3  | 106.4 | 91    | 118.5 | 87.9  | 100.9 | 99.43333 | 1 |
| 1 | 111   | 119.2 | 70.2  | 110.7 | 75.8  | 113.1 | 100.8333 | 1 |
| 1 | 93.9  | 90.5  | 105.1 | 106.4 | 93.2  | 110.9 | 102.1667 | 1 |
| 1 | NA       | 0 |
| 1 | 92    | 101.5 | 105.8 | 94.5  | 112.8 | 93.4  | 100.2333 | 1 |
| 1 | 67.1  | 83.7  | 86.2  | 180   | 69.1  | 114   | 94.63333 | 1 |
| 1 | 69.4  | 74.4  | 115.4 | 100.6 | 120   | 120.1 | 103.3    | 1 |
| 1 | 106.5 | 108.9 | 90.8  | 100.8 | 85.6  | 107.3 | 102.3333 | 1 |
| 1 | 76.8  | 96.9  | 97.7  | 134.7 | 96.1  | 97.8  | 97.46667 | 1 |
| 1 | 100.7 | 89.7  | 102.8 | 84.8  | 83    | 139.1 | 110.5333 | 1 |
| 1 | 90.7  | 113.9 | 92.1  | 98.2  | 116.6 | 88.5  | 98.16667 | 1 |
| 1 | 105   | 116.1 | 82.8  | 93.5  | 120.6 | 82.1  | 93.66667 | 1 |
| 1 | 61.1  | 84.1  | 126.9 | 93.5  | 92.4  | 142   | 117.6667 | 1 |
| 1 | 58.6  | 66.6  | 117.3 | 127   | 83.7  | 146.9 | 110.2667 | 1 |
| 1 | 72    | 60.6  | 96.5  | 160.4 | 100   | 110.5 | 89.2     | 1 |
| 1 | 93.6  | 97    | 95.7  | 110.8 | 92.9  | 110   | 100.9    | 1 |
| 1 | 109.1 | 93.4  | 74    | 89.4  | 116.1 | 117.9 | 95.1     | 1 |
| 1 | NA       | 0 |
| 1 | 88.8  | 83.3  | 116.6 | 123.5 | 84.8  | 103   | 100.9667 | 1 |
| 1 | 97.4  | 137.3 | 86.2  | 83.8  | 106.5 | 88.7  | 104.0667 | 1 |
| 1 | 76.1  | 89.5  | 102.2 | 99    | 87.7  | 145.4 | 112.3667 | 1 |
| 1 | 85.2  | 86.5  | 112.7 | 90.4  | 123.3 | 101.9 | 100.3667 | 1 |
| 1 | 124.3 | 78    | 101.2 | 100.7 | 80.4  | 115.3 | 98.16667 | 1 |
| 1 | 118.5 | 94    | 96.5  | 95    | 101.5 | 94.5  | 95       | 1 |
| 1 | 96.4  | 85.4  | 107.3 | 102.1 | 102.4 | 106.3 | 99.66667 | 1 |
| 1 | 100.4 | 96.8  | 96.1  | 97.8  | 110.1 | 98.8  | 97.23333 | 1 |
| 1 | 119.7 | 95    | 144.5 | 85.2  | 72.5  | 83.1  | 107.5333 | 1 |
| 1 | 87.4  | 101.1 | 115.3 | 100.4 | 96.1  | 99.6  | 105.3333 | 1 |
| 1 | 99.9  | 69.8  | 111   | 83.7  | 109.1 | 126.6 | 102.4667 | 1 |
| 1 | 97.2  | 105.6 | 111   | 92.1  | 74.4  | 119.7 | 112.1    | 1 |
| 1 | 70.2  | 79.1  | 148.5 | 69.3  | 149.7 | 83.2  | 103.6    | 1 |
| 1 | 145.2 | 88.7  | 89.5  | 83.5  | 117.9 | 75.2  | 84.46667 | 1 |
| 1 | 90.1  | 84.3  | 106   | 107.2 | 93.5  | 119   | 103.1    | 1 |
| 1 | 103.1 | 98.9  | 94.8  | 101.9 | 84.4  | 117   | 103.5667 | 1 |
| 1 | 39.8  | 61.1  | 151.3 | 136.2 | 111.8 | 99.9  | 104.1    | 1 |
| 1 | 116.8 | 129.6 | 87    | 80.3  | 79.6  | 106.7 | 107.7667 | 1 |
| 1 | 104.6 | 103.1 | 102.8 | 92.5  | 119.6 | 77.4  | 94.43333 | 1 |
| 1 | 72.2  | 111.8 | 115.2 | 111   | 83.1  | 106.6 | 111.2    | 1 |
| 1 | 175.2 | 83.9  | 79.3  | 85.8  | 95.9  | 79.9  | 81.03333 | 1 |
| 1 | 85.6  | 88.4  | 124.2 | 106.5 | 101.5 | 93.8  | 102.1333 | 1 |
| 1 | 100.9 | 112.2 | 95    | 106.5 | 100.3 | 85    | 97.4     | 1 |
| 1 | 59.9  | 75.6  | 107.9 | 115.2 | 76.1  | 165.3 | 116.2667 | 1 |
| 1 | 78.8  | 126   | 92.1  | 96.2  | 90.4  | 116.5 | 111.5333 | 1 |
| 1 | NA       | 0 |
| 1 | 97.7  | 95.5  | 108.7 | 104.1 | 109.5 | 84.4  | 96.2     | 1 |
| 1 | 87.5  | 95.8  | 108.9 | 117.5 | 93.3  | 97    | 100.5667 | 1 |
| 1 | 84.2  | 80.8  | 118.9 | 95    | 98.8  | 122.3 | 107.3333 | 1 |
| 1 | 73.1  | 78.8  | 128.5 | 118.6 | 82.7  | 118.2 | 108.5    | 1 |
| 1 | 106   | 91.4  | 103.4 | 95.9  | 99.5  | 103.9 | 99.56667 | 1 |
| 1 | 91    | 95.1  | 86.8  | 99.7  | 98.8  | 128.6 | 103.5    | 1 |
| 1 | 228.6 | 77.8  | 71.8  | 61.4  | 62.2  | 98.2  | 82.6     | 1 |



|      |       |       |       |       |       |       |          |   |
|------|-------|-------|-------|-------|-------|-------|----------|---|
| 1    | 68.4  | 76.4  | 126.5 | 137.7 | 84.5  | 106.6 | 103.1667 | 1 |
| 1 NA | NA    | NA    | NA    | NA    | NA    | NA    | NA       | 0 |
| 1    | 84.2  | 72.8  | 115.4 | 104   | 114.1 | 109.6 | 99.26667 | 1 |
| 1 NA | NA    | NA    | NA    | NA    | NA    | NA    | NA       | 0 |
| 1    | 73.3  | 69.9  | 110   | 116.2 | 98.6  | 131.9 | 103.9333 | 1 |
| 1    | 91.4  | 103   | 104.9 | 100.6 | 80.2  | 119.9 | 109.2667 | 1 |
| 1    | 65.5  | 79.6  | 126.6 | 106.1 | 81    | 141.1 | 115.7667 | 1 |
| 1    | 103.1 | 109.3 | 83.8  | 110.6 | 92    | 101.2 | 98.1     | 1 |
| 1    | 96    | 87.9  | 109.7 | 119.7 | 85    | 101.6 | 99.73333 | 1 |
| 1    | 100.9 | 139.3 | 119.5 | 78.2  | 82    | 80.2  | 113      | 1 |
| 1    | 91.5  | 115   | 57.6  | 72.6  | 85.6  | 177.8 | 116.8    | 1 |
| 1    | 80.1  | 66.7  | 119.8 | 115.3 | 91.6  | 126.5 | 104.3333 | 1 |
| 1    | 93.5  | 111.8 | 123.4 | 81.9  | 93.4  | 95.9  | 110.3667 | 1 |
| 1    | 91.5  | 91.1  | 104.2 | 107.6 | 101.1 | 104.6 | 99.96667 | 1 |
| 1    | 142   | 124.6 | 88.5  | 75.2  | 90    | 79.6  | 97.56667 | 1 |
| 1    | 119.1 | 86.4  | 91    | 111   | 101   | 91.5  | 89.63333 | 1 |
| 1    | 70.5  | 98.6  | 109.1 | 90    | 87.9  | 143.7 | 117.1333 | 1 |
| 1    | 121.3 | 90.4  | 91.1  | 113.2 | 118.6 | 65.4  | 82.3     | 1 |
| 1 NA | NA    | NA    | NA    | NA    | NA    | NA    | NA       | 0 |
| 1    | 130.7 | 82.8  | 85    | 96.3  | 103.7 | 101.5 | 89.76667 | 1 |
| 1    | 119.6 | 114.8 | 85.8  | 96.9  | 102.7 | 80.2  | 93.6     | 1 |
| 1 NA | NA    | NA    | NA    | NA    | NA    | NA    | NA       | 0 |
| 1    | 210.5 | 81.9  | 54.8  | 85.5  | 100.6 | 66.7  | 67.8     | 1 |
| 1    | 66.1  | 100   | 112.4 | 126.7 | 85.3  | 109.4 | 107.2667 | 1 |
| 1    | 127.3 | 122.7 | 87.3  | 72.8  | 115.5 | 74.4  | 94.8     | 1 |
| 1    | 69    | 76    | 104.4 | 111.9 | 106.7 | 132   | 104.1333 | 1 |
| 1    | 76    | 112.2 | 90.6  | 97.4  | 119.7 | 104.2 | 102.3333 | 1 |
| 1    | 71.1  | 75.3  | 122.9 | 106.6 | 78.5  | 145.5 | 114.5667 | 1 |
| 1    | 74.1  | 75.7  | 113.2 | 122.5 | 120.3 | 94.2  | 94.36667 | 1 |
| 1    | 59.6  | 58.5  | 32.5  | 299.3 | 51.9  | 98.3  | 63.1     | 1 |
| 1    | 95.1  | 89.5  | 90.7  | 125.9 | 87.7  | 111   | 97.06667 | 1 |
| 1    | 84.1  | 92    | 80.7  | 82.5  | 80.6  | 180.1 | 117.6    | 1 |
| 1    | 121.9 | 101   | 109.4 | 84.5  | 93.4  | 89.8  | 100.0667 | 1 |
| 1    | 86.7  | 97.8  | 101.6 | 105.5 | 104.9 | 103.5 | 100.9667 | 1 |
| 1    | 77.5  | 79.9  | 200.1 | 86.6  | 88.2  | 67.7  | 115.9    | 1 |
| 1    | 72.6  | 111.7 | 105.2 | 111.3 | 115.9 | 83.3  | 100.0667 | 1 |
| 1    | 62.6  | 68.9  | 127.7 | 153.6 | 67    | 120.2 | 105.6    | 1 |
| 1    | 93.1  | 90.2  | 86.8  | 115.3 | 113.1 | 101.5 | 92.83333 | 1 |
| 1    | 108.6 | 122.6 | 98.4  | 79.9  | 92.4  | 98.2  | 106.4    | 1 |
| 1    | 69.3  | 79.7  | 101.4 | 125.1 | 83.2  | 141.3 | 107.4667 | 1 |
| 1    | 95.2  | 88.8  | 92.7  | 113.1 | 97.6  | 112.6 | 98.03333 | 1 |
| 1    | 69.3  | 94.5  | 115.3 | 107.5 | 97.5  | 116   | 108.6    | 1 |
| 1 NA | NA    | NA    | NA    | NA    | NA    | NA    | NA       | 0 |
| 1 NA | NA    | NA    | NA    | NA    | NA    | NA    | NA       | 0 |
| 1    | 118.2 | 102.6 | 73.1  | 85.4  | 102.4 | 118.3 | 98       | 1 |
| 1    | 70.3  | 64.7  | 150.5 | 105.8 | 96.3  | 112.4 | 109.2    | 1 |
| 1    | 82.7  | 82.1  | 175.6 | 92.1  | 77.4  | 90.1  | 115.9333 | 1 |
| 1    | 93.4  | 123.8 | 58.9  | 100.1 | 139.6 | 84.2  | 88.96667 | 1 |
| 1    | 90.3  | 83.7  | 104.7 | 101.4 | 91    | 128.9 | 105.7667 | 1 |
| 1 NA | NA    | NA    | NA    | NA    | NA    | NA    | NA       | 0 |
| 1    | 115   | 87.8  | 95.9  | 103.9 | 97.1  | 100.3 | 94.66667 | 1 |

|   |       |       |       |       |       |       |          |   |
|---|-------|-------|-------|-------|-------|-------|----------|---|
| 1 | 82.5  | 92    | 124.5 | 107.9 | 81.3  | 111.8 | 109.4333 | 1 |
| 1 | 91.3  | 96.7  | 109.4 | 114.1 | 64.8  | 123.8 | 109.9667 | 1 |
| 1 | 78.7  | 94.7  | 95    | 89.6  | 110.9 | 131   | 106.9    | 1 |
| 1 | 44.7  | 60.3  | 106.9 | 69.2  | 55.8  | 263.1 | 143.4333 | 1 |
| 1 | 94.9  | 97.5  | 95.9  | 102.9 | 91.8  | 116.9 | 103.4333 | 1 |
| 1 | 107.3 | 99.4  | 86.6  | 110   | 99.8  | 96.9  | 94.3     | 1 |
| 1 | 58.2  | 31.9  | 105.6 | 174   | 111.6 | 118.8 | 85.43333 | 1 |
| 1 | 87.9  | 111.2 | 104.6 | 112.2 | 118.8 | 65.3  | 93.7     | 1 |
| 1 | 88.3  | 90.6  | 88.4  | 96.3  | 83.4  | 153   | 110.6667 | 1 |
| 1 | 95.8  | 90.5  | 117.1 | 101.7 | 107.9 | 87.1  | 98.23333 | 1 |
| 1 | NA       | 0 |
| 1 | 85.5  | 78    | 131.4 | 109.7 | 80.9  | 114.5 | 107.9667 | 1 |
| 1 | 106.6 | 90.3  | 92.6  | 100.7 | 90.6  | 119.3 | 100.7333 | 1 |
| 1 | 85.6  | 95.9  | 99.7  | 104.1 | 89.3  | 125.5 | 107.0333 | 1 |
| 1 | 132.7 | 114.7 | 73.3  | 84.8  | 105.9 | 88.5  | 92.16667 | 1 |
| 1 | 53.3  | 54.6  | 155.7 | 109.8 | 80.3  | 146.4 | 118.9    | 1 |
| 1 | 104.5 | 90.2  | 93.8  | 111.6 | 99.3  | 100.7 | 94.9     | 1 |
| 1 | 91.5  | 102.2 | 105.4 | 105.2 | 105.9 | 89.7  | 99.1     | 1 |
| 1 | 110.7 | 99    | 81.4  | 96.7  | 108   | 104.1 | 94.83333 | 1 |
| 1 | 97.1  | 111   | 106.4 | 90.7  | 104.9 | 89.7  | 102.3667 | 1 |
| 1 | 82.9  | 75    | 80    | 117.2 | 81.4  | 163.6 | 106.2    | 1 |
| 1 | 106.9 | 97.9  | 91.8  | 106.3 | 96.9  | 100.2 | 96.63333 | 1 |
| 1 | 71.3  | 106.6 | 93.1  | 104.8 | 95.4  | 128.8 | 109.5    | 1 |
| 1 | 108.2 | 92.2  | 97.2  | 97.6  | 98.3  | 106.6 | 98.66667 | 1 |
| 1 | 73.8  | 78.2  | 122.2 | 110.7 | 68.5  | 146.6 | 115.6667 | 1 |
| 1 | 73.7  | 79.8  | 109   | 105.9 | 160.6 | 70.9  | 86.56667 | 1 |
| 1 | 71.5  | 97.6  | 115.4 | 88.3  | 91.2  | 136.1 | 116.3667 | 1 |
| 1 | NA       | 0 |
| 1 | 122.6 | 107.1 | 79.8  | 95.8  | 99.4  | 95.3  | 94.06667 | 1 |
| 1 | 91.5  | 82.8  | 129.4 | 107.8 | 116.6 | 71.9  | 94.7     | 1 |
| 1 | 139.5 | 76.3  | 100.5 | 97.6  | 79.5  | 106.6 | 94.46667 | 1 |
| 1 | 84.6  | 83.7  | 104   | 103.9 | 110.5 | 113.4 | 100.3667 | 1 |
| 1 | NA       | 0 |
| 1 | NA       | 0 |
| 1 | 84.6  | 74.8  | 100.7 | 102.1 | 119.9 | 117.9 | 97.8     | 1 |
| 1 | 108.9 | 110.5 | 89.9  | 82.2  | 114.4 | 94.1  | 98.16667 | 1 |
| 1 | 87.8  | 104.4 | 89.4  | 92.5  | 87    | 138.9 | 110.9    | 1 |
| 1 | 75.7  | 66.2  | 131.5 | 111.3 | 89.1  | 126.2 | 107.9667 | 1 |
| 1 | 73.4  | 79.7  | 124.3 | 105.7 | 86.8  | 130   | 111.3333 | 1 |
| 1 | NA       | 0 |
| 1 | 91.5  | 97    | 97.8  | 105.3 | 100.3 | 108.1 | 100.9667 | 1 |
| 1 | 83.1  | 79.4  | 109.6 | 101.5 | 102.4 | 124.1 | 104.3667 | 1 |
| 1 | 93.4  | 111.6 | 74.5  | 73.4  | 76.2  | 170.8 | 118.9667 | 1 |
| 1 | 94.4  | 71.3  | 111.2 | 144.1 | 103.6 | 75.4  | 85.96667 | 1 |
| 1 | 117.6 | 109.1 | 81.2  | 107.1 | 98.3  | 86.8  | 92.36667 | 1 |
| 1 | 116.4 | 78    | 80.7  | 100.9 | 99    | 124.9 | 94.53333 | 1 |
| 1 | NA       | 0 |
| 1 | 120.3 | 82.6  | 86.6  | 91.3  | 104.2 | 115   | 94.73333 | 1 |
| 1 | NA       | 0 |
| 1 | 69.7  | 75.4  | 163   | 86.6  | 73.6  | 131.7 | 123.3667 | 1 |
| 1 | 96    | 86.8  | 108.6 | 104   | 117.7 | 86.8  | 94.06667 | 1 |

|      |       |       |       |       |       |       |          |   |
|------|-------|-------|-------|-------|-------|-------|----------|---|
| 1    | 89.7  | 127.1 | 73.3  | 83.6  | 110.7 | 115.5 | 105.3    | 1 |
| 1 NA | NA    | NA    | NA    | NA    | NA    | NA    | NA       | 0 |
| 1    | 71.1  | 61.9  | 127.6 | 188.3 | 63.3  | 87.9  | 92.46667 | 1 |
| 1    | 73.9  | 74.3  | 106   | 96.7  | 87.9  | 161.2 | 113.8333 | 1 |
| 1    | 88.5  | 102.5 | 91.7  | 76.5  | 77.8  | 163.1 | 119.1    | 1 |
| 1    | 88.5  | 104.2 | 107.4 | 102.4 | 104.8 | 92.7  | 101.4333 | 1 |
| 1 NA | NA    | NA    | NA    | NA    | NA    | NA    | NA       | 0 |
| 1    | 70.4  | 124   | 86.1  | 87.8  | 146.8 | 85    | 98.36667 | 1 |
| 1    | 129.6 | 62.3  | 88.5  | 117.1 | 89.5  | 113   | 87.93333 | 1 |
| 1    | 94.6  | 72.8  | 82    | 119.1 | 61.8  | 169.7 | 108.1667 | 1 |
| 1    | 111.4 | 92.3  | 88.5  | 111   | 105   | 91.9  | 90.9     | 1 |
| 1    | 86    | 113   | 94.9  | 100.5 | 86.2  | 119.4 | 109.1    | 1 |
| 1 NA | NA    | NA    | NA    | NA    | NA    | NA    | NA       | 0 |
| 1    | 117.8 | 91.1  | 87.1  | 115.7 | 101.6 | 86.7  | 88.3     | 1 |
| 1    | 77.9  | 74.3  | 109.2 | 123.6 | 104   | 111   | 98.16667 | 1 |
| 1    | 101.9 | 79.1  | 105.2 | 101.7 | 105.1 | 107.1 | 97.13333 | 1 |
| 1    | 90.8  | 69.2  | 113.9 | 118.1 | 93.4  | 114.7 | 99.26667 | 1 |
| 1    | 148.1 | 94.9  | 111.8 | 86    | 89.7  | 69.5  | 92.06667 | 1 |
| 1    | 98.3  | 123.8 | 102.1 | 90.5  | 93.5  | 91.8  | 105.9    | 1 |
| 1    | 92.6  | 93.4  | 96.7  | 109   | 119.3 | 88.9  | 93       | 1 |
| 1    | 84.1  | 68.4  | 174.2 | 106.9 | 72.1  | 94.4  | 112.3333 | 1 |
| 1    | 73.7  | 108.1 | 162.2 | 92.6  | 88.5  | 74.9  | 115.0667 | 1 |
| 1    | 117.3 | 82.9  | 92.9  | 92.7  | 84.3  | 130   | 101.9333 | 1 |
| 1    | 103.9 | 103.1 | 98.6  | 98.9  | 87.7  | 107.7 | 103.1333 | 1 |
| 1 NA | NA    | NA    | NA    | NA    | NA    | NA    | NA       | 0 |
| 1    | 102   | 73.1  | 106.4 | 108.3 | 123.1 | 87.1  | 88.86667 | 1 |
| 1    | 143.7 | 119.4 | 75.2  | 77.1  | 114.1 | 70.5  | 88.36667 | 1 |
| 1    | 80.5  | 77.9  | 95    | 135.6 | 122.2 | 88.8  | 87.23333 | 1 |
| 1 NA | NA    | NA    | NA    | NA    | NA    | NA    | NA       | 0 |
| 1    | 90.1  | 107.5 | 118.5 | 81.9  | 86.5  | 115.5 | 113.8333 | 1 |
| 1    | 76.1  | 83.1  | 121.6 | 95.3  | 82.4  | 141.5 | 115.4    | 1 |
| 1    | 88.7  | 85.8  | 107.8 | 109.1 | 105.7 | 102.8 | 98.8     | 1 |
| 1    | 81.7  | 94.6  | 126.8 | 73.8  | 113.6 | 109.5 | 110.3    | 1 |
| 1    | 86.6  | 96.3  | 95.3  | 107.2 | 116   | 98.7  | 96.76667 | 1 |
| 1    | 60.9  | 70    | 119.7 | 124.2 | 114.3 | 110.8 | 100.1667 | 1 |
| 1    | 77.4  | 88    | 99.9  | 99.2  | 61.9  | 173.6 | 120.5    | 1 |
| 1    | 74.6  | 75.6  | 112.1 | 114.6 | 107.6 | 115.5 | 101.0667 | 1 |
| 1 NA | NA    | NA    | NA    | NA    | NA    | NA    | NA       | 0 |
| 1    | 83.7  | 106.6 | 109.8 | 105.2 | 107.4 | 87.3  | 101.2333 | 1 |
| 1    | 62.9  | 115.5 | 102.1 | 132.2 | 81.3  | 106.1 | 107.9    | 1 |
| 1    | 90.4  | 94.7  | 68.2  | 67.7  | 94.4  | 184.7 | 115.8667 | 1 |
| 1    | 62.9  | 96.3  | 130.1 | 122.1 | 77    | 111.7 | 112.7    | 1 |
| 1    | 96.6  | 92.4  | 88.1  | 110.7 | 96.2  | 115.9 | 98.8     | 1 |
| 1    | 131.4 | 99    | 132.1 | 75.5  | 77.3  | 84.8  | 105.3    | 1 |
| 1    | 94.4  | 77    | 106.1 | 110.6 | 85.9  | 125.9 | 103      | 1 |
| 1    | 65.5  | 90.8  | 144.2 | 124.1 | 63.1  | 112.3 | 115.7667 | 1 |
| 1    | 59.5  | 45.8  | 210.1 | 96.9  | 72.6  | 115.2 | 123.7    | 1 |
| 1    | 87.7  | 91.3  | 92    | 100.9 | 109.3 | 118.9 | 100.7333 | 1 |
| 1    | 98    | 105.5 | 76.6  | 76.2  | 174.1 | 69.6  | 83.9     | 1 |
| 1    | 101.9 | 132.9 | 95.8  | 82.7  | 93.3  | 93.4  | 107.3667 | 1 |
| 1    | 83    | 97    | 94.2  | 102.1 | 98.2  | 125.6 | 105.6    | 1 |



|   |       |       |       |       |       |       |          |   |
|---|-------|-------|-------|-------|-------|-------|----------|---|
| 1 | 99.6  | 88.7  | 115   | 93.7  | 90.1  | 112.9 | 105.5333 | 1 |
| 1 | 109.1 | 85.7  | 91    | 98.8  | 116   | 99.3  | 92       | 1 |
| 1 | 115   | 83.6  | 107.2 | 97.4  | 101.7 | 95    | 95.26667 | 1 |
| 1 | 89.9  | 92.3  | 103.7 | 99.8  | 94.5  | 119.8 | 105.2667 | 1 |
| 1 | 62.4  | 144.2 | 129.9 | 159.8 | 50.1  | 53.6  | 109.2333 | 1 |
| 1 | NA       | 0 |
| 1 | 86.5  | 89.4  | 112.1 | 109.3 | 83.4  | 119.3 | 106.9333 | 1 |
| 1 | 155.8 | 88.7  | 116.2 | 74.4  | 89.1  | 75.8  | 93.56667 | 1 |
| 1 | 67.4  | 63.7  | 164.3 | 119.1 | 65.3  | 120.3 | 116.1    | 1 |
| 1 | 88    | 80.1  | 76.9  | 129.7 | 93.6  | 131.7 | 96.23333 | 1 |
| 1 | 100.5 | 94.9  | 103   | 102   | 94.6  | 104.9 | 100.9333 | 1 |
| 1 | 89.4  | 84.9  | 105.5 | 97.9  | 141.1 | 81.2  | 90.53333 | 1 |
| 1 | 78.2  | 80.2  | 133.9 | 90.6  | 90.6  | 126.4 | 113.5    | 1 |
| 1 | 164.8 | 124.9 | 102.8 | 50.6  | 89.8  | 67    | 98.23333 | 1 |
| 1 | 56.8  | 83.9  | 97.8  | 110.7 | 101.6 | 149.1 | 110.2667 | 1 |
| 1 | NA       | 0 |
| 1 | 99.1  | 95.1  | 96.2  | 99.3  | 69.3  | 140.8 | 110.7    | 1 |
| 1 | 144.6 | 107.6 | 71.1  | 73.8  | 127.1 | 75.8  | 84.83333 | 1 |
| 1 | 95.6  | 127.3 | 94.9  | 80.6  | 119.5 | 82.2  | 101.4667 | 1 |
| 1 | 92    | 82.9  | 94.2  | 115   | 93.2  | 122.7 | 99.93333 | 1 |
| 1 | NA       | 0 |
| 1 | 108.5 | 90    | 79.9  | 77    | 145.9 | 98.6  | 89.5     | 1 |
| 1 | 92.4  | 119.4 | 96.4  | 88.7  | 103.9 | 99.2  | 105      | 1 |
| 1 | 105.5 | 78.6  | 82.9  | 110.2 | 93.1  | 129.7 | 97.06667 | 1 |
| 1 | 99.4  | 98.3  | 104.8 | 102.8 | 105.2 | 89.4  | 97.5     | 1 |
| 1 | 64.9  | 77    | 129.1 | 90.5  | 112.8 | 125.6 | 110.5667 | 1 |
| 1 | 113.6 | 105.9 | 80.2  | 102.9 | 98.9  | 98.6  | 94.9     | 1 |
| 1 | 88.6  | 113.9 | 117.7 | 90    | 107.4 | 82.4  | 104.6667 | 1 |
| 1 | 101.4 | 99.8  | 91.7  | 122.4 | 81.5  | 103.2 | 98.23333 | 1 |
| 1 | 83.5  | 67.9  | 244.5 | 44    | 62.1  | 98    | 136.8    | 1 |
| 1 | NA       | 0 |
| 1 | NA       | 0 |
| 1 | 88.5  | 85.2  | 81.8  | 100.2 | 91.5  | 152.9 | 106.6333 | 1 |
| 1 | 133.8 | 100.8 | 97    | 76.2  | 118.3 | 73.9  | 90.56667 | 1 |
| 1 | NA       | 0 |
| 1 | 87.3  | 100.7 | 105   | 84.9  | 116.3 | 105.8 | 103.8333 | 1 |
| 1 | 72.6  | 84.1  | 137.4 | 100.5 | 82.2  | 123.2 | 114.9    | 1 |
| 1 | 62.8  | 72.8  | 112.5 | 117.8 | 79.1  | 155   | 113.4333 | 1 |
| 1 | 87.8  | 67    | 89.4  | 119.5 | 120.3 | 115.9 | 90.76667 | 1 |
| 1 | 92.9  | 93.8  | 111.6 | 101.4 | 91    | 109.3 | 104.9    | 1 |
| 1 | 67.5  | 68.3  | 151.5 | 93.2  | 96.3  | 123.3 | 114.3667 | 1 |
| 1 | NA       | 0 |
| 1 | 105.3 | 86.7  | 108.1 | 107.3 | 90.1  | 102.6 | 99.13333 | 1 |
| 1 | 98.3  | 103.2 | 107   | 101.3 | 86.7  | 103.5 | 104.5667 | 1 |
| 1 | 107.1 | 109.4 | 98.7  | 101.5 | 100.8 | 82.6  | 96.9     | 1 |
| 1 | 106.8 | 98.2  | 97    | 95.8  | 102.3 | 99.9  | 98.36667 | 1 |
| 1 | 75.9  | 165.1 | 106.5 | 107.5 | 76.2  | 68.9  | 113.5    | 1 |
| 1 | 105.7 | 90.5  | 94.7  | 114.1 | 118.2 | 76.8  | 87.33333 | 1 |
| 1 | 99.3  | 103.7 | 113.5 | 96.7  | 76    | 110.8 | 109.3333 | 1 |
| 1 | 118.5 | 98.9  | 87.2  | 98.1  | 116.7 | 80.6  | 88.9     | 1 |
| 1 | 141.9 | 110.5 | 100.3 | 79.3  | 89.9  | 78.1  | 96.3     | 1 |



|      |       |       |       |       |       |       |          |   |
|------|-------|-------|-------|-------|-------|-------|----------|---|
| 1    | 75.6  | 78.3  | 130   | 133.2 | 75.7  | 107.2 | 105.1667 | 1 |
| 1    | 87.9  | 104.6 | 140.7 | 101.8 | 63.5  | 101.5 | 115.6    | 1 |
| 1    | 81.3  | 78.5  | 78.1  | 99.5  | 63.6  | 199.1 | 118.5667 | 1 |
| 1 NA | NA    | NA    | NA    | NA    | NA    | NA    | NA       | 0 |
| 1    | 70.8  | 66.6  | 221.1 | 85.1  | 70    | 86.4  | 124.7    | 1 |
| 1 NA | NA    | NA    | NA    | NA    | NA    | NA    | NA       | 0 |
| 1    | 100.4 | 85.7  | 117.2 | 88.5  | 81.7  | 126.5 | 109.8    | 1 |
| 1 NA | NA    | NA    | NA    | NA    | NA    | NA    | NA       | 0 |
| 1    | 80.6  | 94.5  | 110.8 | 118.6 | 79.4  | 116.1 | 107.1333 | 1 |
| 1 NA | NA    | NA    | NA    | NA    | NA    | NA    | NA       | 0 |
| 1    | 82.7  | 95.8  | 99.5  | 105.3 | 68.7  | 148   | 114.4333 | 1 |
| 1    | 64.1  | 94.5  | 119.6 | 90.7  | 96.1  | 135   | 116.3667 | 1 |
| 1    | 75.5  | 74.3  | 117.7 | 105.6 | 71    | 155.9 | 115.9667 | 1 |
| 1    | 98.9  | 92.6  | 110.3 | 96.1  | 89.6  | 112.5 | 105.1333 | 1 |
| 1    | 98.3  | 73.2  | 91.3  | 106.2 | 100.9 | 130.2 | 98.23333 | 1 |
| 1 NA | NA    | NA    | NA    | NA    | NA    | NA    | NA       | 0 |
| 1    | 93    | 105.3 | 87.9  | 114.6 | 98.4  | 100.8 | 98       | 1 |
| 1    | 58.5  | 69.5  | 140.4 | 107.3 | 74    | 150.3 | 120.0667 | 1 |
| 1 NA | NA    | NA    | NA    | NA    | NA    | NA    | NA       | 0 |
| 1 NA | NA    | NA    | NA    | NA    | NA    | NA    | NA       | 0 |
| 1 NA | NA    | NA    | NA    | NA    | NA    | NA    | NA       | 0 |
| 1    | 80.1  | 88.4  | 117.2 | 108.1 | 71.7  | 134.5 | 113.3667 | 1 |
| 1    | 106.7 | 104.8 | 74.1  | 80.9  | 76.9  | 156.6 | 111.8333 | 1 |
| 1    | 90    | 82.4  | 108.6 | 106.7 | 97.2  | 115.1 | 102.0333 | 1 |
| 1    | 97.5  | 103.7 | 92.9  | 92.9  | 112.1 | 100.9 | 99.16667 | 1 |
| 1    | 108   | 100.3 | 107.3 | 96.3  | 80    | 108   | 105.2    | 1 |
| 1 NA | NA    | NA    | NA    | NA    | NA    | NA    | NA       | 0 |
| 1    | 85.8  | 106.8 | 98.6  | 95    | 92.7  | 121.1 | 108.8333 | 1 |
| 1 NA | NA    | NA    | NA    | NA    | NA    | NA    | NA       | 0 |
| 1    | 119.2 | 92.4  | 105.7 | 95.1  | 89.6  | 98.1  | 98.73333 | 1 |
| 1    | 87.1  | 107.7 | 132.6 | 90.9  | 106.7 | 75.2  | 105.1667 | 1 |
| 1    | 93.4  | 149.6 | 71.8  | 106.3 | 73.3  | 105.6 | 109      | 1 |
| 1    | 96    | 95.1  | 66.6  | 62.4  | 72.2  | 207.7 | 123.1333 | 1 |
| 1    | 103.9 | 104.2 | 108.2 | 94.5  | 102.8 | 86.4  | 99.6     | 1 |
| 1    | 93.2  | 91.2  | 109.9 | 105.7 | 85    | 114.9 | 105.3333 | 1 |
| 1    | 58.3  | 73.8  | 129.3 | 99.1  | 89.3  | 150.2 | 117.7667 | 1 |
| 1    | 107.1 | 98.6  | 81    | 95    | 117.9 | 100.4 | 93.33333 | 1 |
| 1    | 68.7  | 66.5  | 212.6 | 91    | 82.9  | 78.3  | 119.1333 | 1 |
| 1    | 89.8  | 86.8  | 107.5 | 127.4 | 80.9  | 107.5 | 100.6    | 1 |
| 1 NA | NA    | NA    | NA    | NA    | NA    | NA    | NA       | 0 |
| 1    | 106.2 | 106.9 | 88.6  | 96    | 101.8 | 100.6 | 98.7     | 1 |
| 1    | 100.4 | 112.2 | 94.4  | 84.2  | 114.2 | 94.5  | 100.3667 | 1 |
| 1    | 76.5  | 88.3  | 111.3 | 100.9 | 104.1 | 118.8 | 106.1333 | 1 |
| 1    | 81.9  | 76.9  | 104.2 | 110.1 | 86.2  | 140.7 | 107.2667 | 1 |
| 1 NA | NA    | NA    | NA    | NA    | NA    | NA    | NA       | 0 |
| 1    | 86.9  | 89.5  | 107.9 | 99.4  | 90    | 126.3 | 107.9    | 1 |
| 1    | 69.6  | 87.3  | 101.1 | 130.8 | 83.5  | 127.7 | 105.3667 | 1 |
| 1 NA | NA    | NA    | NA    | NA    | NA    | NA    | NA       | 0 |
| 1    | 81.9  | 71.8  | 118.7 | 105.6 | 91.1  | 131   | 107.1667 | 1 |
| 1    | 114.4 | 102.6 | 88.6  | 93.7  | 135.6 | 65.2  | 85.46667 | 1 |
| 1    | 121.4 | 112.7 | 81.6  | 88.7  | 103.9 | 91.7  | 95.33333 | 1 |





|      |       |       |       |       |       |       |          |   |
|------|-------|-------|-------|-------|-------|-------|----------|---|
| 1    | 121.9 | 99.7  | 101   | 86.6  | 95.1  | 95.6  | 98.76667 | 1 |
| 1 NA | NA    | NA    | NA    | NA    | NA    | NA    | NA       | 0 |
| 1    | 110.5 | 67.9  | 102.3 | 112.3 | 69.7  | 137.2 | 102.4667 | 1 |
| 1    | 106.6 | 84.6  | 109.7 | 97.2  | 85.7  | 116.2 | 103.5    | 1 |
| 1 NA | NA    | NA    | NA    | NA    | NA    | NA    | NA       | 0 |
| 1    | 112.2 | 96.4  | 102.4 | 86.4  | 113.5 | 89    | 95.93333 | 1 |
| 1 NA | NA    | NA    | NA    | NA    | NA    | NA    | NA       | 0 |
| 1 NA | NA    | NA    | NA    | NA    | NA    | NA    | NA       | 0 |
| 1    | 62.3  | 68.4  | 106.9 | 73.7  | 86.1  | 202.6 | 125.9667 | 1 |
| 1    | 92    | 91.8  | 88.5  | 120   | 98.7  | 109   | 96.43333 | 1 |
| 1    | 118.2 | 101   | 100.9 | 92.6  | 113.4 | 73.9  | 91.93333 | 1 |
| 1    | 80    | 97.3  | 93.3  | 158.1 | 75.6  | 95.7  | 95.43333 | 1 |
| 1 NA | NA    | NA    | NA    | NA    | NA    | NA    | NA       | 0 |
| 1    | 101   | 129.6 | 88.2  | 82.2  | 102.7 | 96.3  | 104.7    | 1 |
| 1    | 76.9  | 88.5  | 94.1  | 95    | 116   | 129.6 | 104.0667 | 1 |
| 1    | 56.3  | 78.9  | 122.6 | 70.6  | 153.3 | 118.4 | 106.6333 | 1 |
| 1    | 134   | 112.5 | 80.3  | 84.7  | 107.8 | 80.8  | 91.2     | 1 |
| 1    | 70.3  | 99.4  | 133.2 | 77.2  | 95.5  | 124.4 | 119      | 1 |
| 1    | 101.3 | 113.6 | 93.1  | 91.7  | 116   | 84.4  | 97.03333 | 1 |
| 1    | 80.6  | 87.1  | 70.8  | 93.4  | 100.9 | 167.2 | 108.3667 | 1 |
| 1 NA | NA    | NA    | NA    | NA    | NA    | NA    | NA       | 0 |
| 1    | 103.4 | 117.9 | 112.5 | 85.2  | 94.9  | 86.1  | 105.5    | 1 |
| 1    | 98.6  | 105   | 70.8  | 89.4  | 148.6 | 87.6  | 87.8     | 1 |
| 1 NA | NA    | NA    | NA    | NA    | NA    | NA    | NA       | 0 |
| 1 NA | NA    | NA    | NA    | NA    | NA    | NA    | NA       | 0 |
| 1    | 71.8  | 90.4  | 114   | 122.1 | 75.1  | 126.6 | 110.3333 | 1 |
| 1    | 67.7  | 63.8  | 145.8 | 117   | 101.5 | 104.2 | 104.6    | 1 |
| 1 NA | NA    | NA    | NA    | NA    | NA    | NA    | NA       | 0 |
| 1    | 62.3  | 70.5  | 193.3 | 50.8  | 122   | 101.1 | 121.6333 | 1 |
| 1    | 81    | 85.4  | 115.3 | 100.5 | 92.8  | 125   | 108.5667 | 1 |
| 1 NA | NA    | NA    | NA    | NA    | NA    | NA    | NA       | 0 |
| 1 NA | NA    | NA    | NA    | NA    | NA    | NA    | NA       | 0 |
| 1 NA | NA    | NA    | NA    | NA    | NA    | NA    | NA       | 0 |
| 1    | 137.2 | 111.5 | 88.4  | 75.3  | 104.5 | 83.1  | 94.33333 | 1 |
| 1    | 144.4 | 169.7 | 72.4  | 50.5  | 79.8  | 83.2  | 108.4333 | 1 |
| 1    | 52.3  | 76.5  | 141.8 | 137.3 | 29.2  | 162.9 | 127.0667 | 1 |
| 1 NA | NA    | NA    | NA    | NA    | NA    | NA    | NA       | 0 |
| 1 NA | NA    | NA    | NA    | NA    | NA    | NA    | NA       | 0 |
| 1    | 143.8 | 116.9 | 89    | 62.1  | 92.4  | 95.8  | 100.5667 | 1 |
| 1    | 62    | 81.7  | 121.5 | 98.8  | 95.2  | 140.8 | 114.6667 | 1 |
| 1    | 106.2 | 136.5 | 91.1  | 67.8  | 111.9 | 86.6  | 104.7333 | 1 |
| 1    | 89.2  | 74.6  | 101.9 | 128.6 | 128.3 | 77.3  | 84.6     | 1 |
| 1 NA | NA    | NA    | NA    | NA    | NA    | NA    | NA       | 0 |
| 1    | 105.2 | 96.9  | 94.7  | 79.7  | 128.8 | 94.7  | 95.43333 | 1 |
| 1 NA | NA    | NA    | NA    | NA    | NA    | NA    | NA       | 0 |
| 1    | 88.5  | 103.7 | 103.5 | 121.9 | 84.6  | 97.8  | 101.6667 | 1 |
| 1    | 73.7  | 95.8  | 117.2 | 123.6 | 80.7  | 109   | 107.3333 | 1 |
| 1 NA | NA    | NA    | NA    | NA    | NA    | NA    | NA       | 0 |
| 1    | 122.5 | 132.9 | 78.6  | 74.7  | 101.9 | 89.4  | 100.3    | 1 |
| 1    | 95.7  | 109.5 | 96    | 97    | 96.3  | 105.4 | 103.6333 | 1 |
| 1    | 267.6 | 56.5  | 70    | 66.2  | 53.2  | 86.4  | 70.96667 | 1 |

|      |       |       |       |       |       |       |          |   |
|------|-------|-------|-------|-------|-------|-------|----------|---|
| 1    | 97.9  | 54.1  | 56.4  | 169.5 | 136.1 | 86    | 65.5     | 1 |
| 1    | 116.1 | 104.2 | 111.1 | 86.5  | 91.9  | 90.2  | 101.8333 | 1 |
| 1 NA | NA    | NA    | NA    | NA    | NA    | NA    | NA       | 0 |
| 1    | 85.7  | 113.2 | 79.1  | 91.3  | 121.4 | 109.2 | 100.5    | 1 |
| 1 NA | NA    | NA    | NA    | NA    | NA    | NA    | NA       | 0 |
| 1    | 123.8 | 68.3  | 111.4 | 89.6  | 69.7  | 137.2 | 105.6333 | 1 |
| 1 NA | NA    | NA    | NA    | NA    | NA    | NA    | NA       | 0 |
| 1    | 110.4 | 90    | 98.5  | 104   | 104.8 | 92.4  | 93.63333 | 1 |
| 1 NA | NA    | NA    | NA    | NA    | NA    | NA    | NA       | 0 |
| 1    | 67.2  | 68.2  | 97    | 128.4 | 106.1 | 133   | 99.4     | 1 |
| 1    | 107.9 | 114.6 | 70.4  | 111.8 | 77.2  | 118.1 | 101.0333 | 1 |
| 1    | 115.4 | 86.4  | 93.1  | 119.1 | 95.9  | 90.1  | 89.86667 | 1 |
| 1    | 119.7 | 106.7 | 103.1 | 87.7  | 87.3  | 95.5  | 101.7667 | 1 |
| 1    | 129.7 | 162.5 | 72.2  | 64.5  | 117.7 | 53.3  | 96       | 1 |
| 1    | 80.4  | 76.1  | 96.3  | 121.4 | 83.6  | 142.1 | 104.8333 | 1 |
| 1    | 103.6 | 69.5  | 106.9 | 105   | 80.4  | 134.6 | 103.6667 | 1 |
| 1    | 102.9 | 116.2 | 105.7 | 92.7  | 91.5  | 91    | 104.3    | 1 |
| 1 NA | NA    | NA    | NA    | NA    | NA    | NA    | NA       | 0 |
| 1    | 93.9  | 89.2  | 98.8  | 96.4  | 104.6 | 117.1 | 101.7    | 1 |
| 1 NA | NA    | NA    | NA    | NA    | NA    | NA    | NA       | 0 |
| 1    | 80.9  | 107.3 | 122.7 | 91.1  | 94.9  | 103.1 | 111.0333 | 1 |
| 1    | 94.7  | 80.7  | 92.6  | 123.8 | 108.9 | 99.3  | 90.86667 | 1 |
| 1    | 100.5 | 95.9  | 95.8  | 113.9 | 103.4 | 90.5  | 94.06667 | 1 |
| 1    | 96.3  | 105.2 | 101.6 | 107.1 | 87.9  | 101.9 | 102.9    | 1 |
| 1    | 122.5 | 88.5  | 92.3  | 92.9  | 60.2  | 143.7 | 108.1667 | 1 |
| 1    | 91.3  | 95.7  | 107.5 | 102.3 | 102   | 101.3 | 101.5    | 1 |
| 1 NA | NA    | NA    | NA    | NA    | NA    | NA    | NA       | 0 |
| 1 NA | NA    | NA    | NA    | NA    | NA    | NA    | NA       | 0 |
| 1    | 69.2  | 79.5  | 110.8 | 138.2 | 79.2  | 123.2 | 104.5    | 1 |
| 1    | 114.4 | 90.6  | 91    | 78.1  | 133.3 | 92.5  | 91.36667 | 1 |
| 1    | 77.8  | 82.8  | 80.2  | 138.9 | 97.9  | 122.4 | 95.13333 | 1 |
| 1    | 103.5 | 81    | 114.8 | 110.8 | 91.8  | 98.1  | 97.96667 | 1 |
| 1    | 84.1  | 94.7  | 115.2 | 101.3 | 93.3  | 111.4 | 107.1    | 1 |
| 1    | 109.5 | 95.9  | 79    | 105.8 | 105.9 | 103.9 | 92.93333 | 1 |
| 1 NA | NA    | NA    | NA    | NA    | NA    | NA    | NA       | 0 |
| 1 NA | NA    | NA    | NA    | NA    | NA    | NA    | NA       | 0 |
| 1    | 91.8  | 88.8  | 96.6  | 96.2  | 110.2 | 116.4 | 100.6    | 1 |
| 1    | 168.5 | 92.5  | 84.2  | 85.9  | 89.8  | 79.1  | 85.26667 | 1 |
| 1    | 127.6 | 109.1 | 47    | 106.9 | 137.1 | 72.3  | 76.13333 | 1 |
| 1    | 111.1 | 90.4  | 91.9  | 116.4 | 105.9 | 84.2  | 88.83333 | 1 |
| 1    | 64.8  | 80.6  | 107.8 | 92.4  | 164.4 | 89.9  | 92.76667 | 1 |
| 1 NA | NA    | NA    | NA    | NA    | NA    | NA    | NA       | 0 |
| 1    | 80.8  | 86.2  | 111   | 114   | 99.4  | 108.7 | 101.9667 | 1 |
| 1    | 93.1  | 94    | 113.1 | 116.9 | 103.3 | 79.5  | 95.53333 | 1 |
| 1    | 99.6  | 95.9  | 104   | 78.8  | 91.7  | 130.1 | 110      | 1 |
| 1    | 115.9 | 92.4  | 93.7  | 71.8  | 89.7  | 136.4 | 107.5    | 1 |
| 1    | 86.8  | 68.9  | 123.8 | 162.2 | 89.7  | 68.5  | 87.06667 | 1 |
| 1    | 82.6  | 78.5  | 98.4  | 93.5  | 67.8  | 179.2 | 118.7    | 1 |
| 1 NA | NA    | NA    | NA    | NA    | NA    | NA    | NA       | 0 |
| 1    | 91.9  | 96    | 87.3  | 83.3  | 97.1  | 144.3 | 109.2    | 1 |
| 1    | 72.4  | 43    | 123.3 | 104.9 | 96.7  | 159.6 | 108.6333 | 1 |

|      |       |       |       |       |       |       |          |   |
|------|-------|-------|-------|-------|-------|-------|----------|---|
| 1    | 137.2 | 97    | 91.8  | 90.2  | 90.5  | 93.3  | 94.03333 | 1 |
| 1 NA | NA    | NA    | NA    | NA    | NA    | NA    | NA       | 0 |
| 1    | 140.9 | 137.3 | 67    | 96.7  | 91.9  | 66.3  | 90.2     | 1 |
| 1    | 43.2  | 92.2  | 78.9  | 110.5 | 143.4 | 131.8 | 100.9667 | 1 |
| 1    | 99    | 89    | 105.1 | 100.8 | 88    | 118.1 | 104.0667 | 1 |
| 1 NA | NA    | NA    | NA    | NA    | NA    | NA    | NA       | 0 |
| 1    | 110.9 | 89.7  | 106.8 | 94.8  | 82.7  | 115.1 | 103.8667 | 1 |
| 1 NA | NA    | NA    | NA    | NA    | NA    | NA    | NA       | 0 |
| 1    | 89.4  | 99    | 112.3 | 100.2 | 80.4  | 118.6 | 109.9667 | 1 |
| 1    | 55.8  | 79.5  | 114.5 | 118.8 | 54.1  | 177.3 | 123.7667 | 1 |
| 1    | 91.5  | 105.4 | 92.8  | 104.7 | 127.2 | 78.4  | 92.2     | 1 |
| 1    | 74.8  | 91.1  | 106.1 | 121.1 | 93.2  | 113.8 | 103.6667 | 1 |
| 1    | 78.7  | 90    | 104.7 | 95.9  | 102.6 | 128.1 | 107.6    | 1 |
| 1    | 105.4 | 180.8 | 74.1  | 62.7  | 105.2 | 71.8  | 108.9    | 1 |
| 1    | 114.4 | 110.9 | 99.1  | 95.6  | 92    | 88    | 99.33333 | 1 |
| 1    | 88    | 86.7  | 83.9  | 95.8  | 91.1  | 154.5 | 108.3667 | 1 |
| 1 NA | NA    | NA    | NA    | NA    | NA    | NA    | NA       | 0 |
| 1    | 142.7 | 145.1 | 68.7  | 70.1  | 123.9 | 49.5  | 87.76667 | 1 |
| 1    | 83.2  | 92.1  | 116.7 | 105   | 94.4  | 108.6 | 105.8    | 1 |
| 1    | 104.4 | 113.4 | 99.6  | 88.1  | 111.8 | 82.7  | 98.56667 | 1 |
| 1 NA | NA    | NA    | NA    | NA    | NA    | NA    | NA       | 0 |
| 1 NA | NA    | NA    | NA    | NA    | NA    | NA    | NA       | 0 |
| 1    | 90.3  | 101.9 | 101.5 | 115   | 105.4 | 85.8  | 96.4     | 1 |
| 1    | 90.9  | 90.5  | 128.8 | 100.8 | 80.6  | 108.5 | 109.2667 | 1 |
| 1    | 90.6  | 96.2  | 92.9  | 108.9 | 125.5 | 85.8  | 91.63333 | 1 |
| 1    | 100.5 | 82.9  | 91.9  | 125.2 | 98.9  | 100.7 | 91.83333 | 1 |
| 1    | 91.5  | 92.9  | 117.6 | 96    | 83.9  | 118.2 | 109.5667 | 1 |
| 1    | 94.5  | 110.7 | 103   | 94.4  | 90    | 107.3 | 107      | 1 |
| 1    | 90.2  | 63.7  | 100.8 | 136.1 | 96.7  | 112.6 | 92.36667 | 1 |
| 1    | 95.5  | 79.2  | 130.6 | 93.4  | 85.6  | 115.6 | 108.4667 | 1 |
| 1 NA | NA    | NA    | NA    | NA    | NA    | NA    | NA       | 0 |
| 1    | 114.9 | 105.6 | 94.5  | 94.7  | 85.3  | 105   | 101.7    | 1 |
| 1    | 97.5  | 84.5  | 136   | 108.4 | 88.9  | 84.7  | 101.7333 | 1 |
| 1    | 108.4 | 100.9 | 90.2  | 103.7 | 108.9 | 87.8  | 92.96667 | 1 |
| 1    | 93.1  | 74.2  | 107   | 140.6 | 82.5  | 102.7 | 94.63333 | 1 |
| 1    | 99.6  | 89.6  | 69    | 126.6 | 116.3 | 98.9  | 85.83333 | 1 |
| 1 NA | NA    | NA    | NA    | NA    | NA    | NA    | NA       | 0 |
| 1    | 104   | 92.9  | 90.8  | 109.2 | 95.1  | 107.9 | 97.2     | 1 |
| 1    | 73.5  | 76    | 138.6 | 117.5 | 75.3  | 119.1 | 111.2333 | 1 |
| 1    | 93.6  | 93.6  | 92.8  | 81.3  | 86.1  | 152.6 | 113      | 1 |
| 1    | 53.3  | 63.1  | 165.8 | 84.3  | 62.9  | 170.5 | 133.1333 | 1 |
| 1 NA | NA    | NA    | NA    | NA    | NA    | NA    | NA       | 0 |
| 1    | 81.8  | 89.8  | 109   | 103   | 98.1  | 118.4 | 105.7333 | 1 |
| 1    | 69.2  | 81.3  | 110.1 | 101.8 | 97.4  | 140.2 | 110.5333 | 1 |
| 1 NA | NA    | NA    | NA    | NA    | NA    | NA    | NA       | 0 |
| 1    | 94.3  | 122.8 | 75.2  | 97.5  | 104.7 | 105.3 | 101.1    | 1 |
| 1    | 105.2 | 114.2 | 84.3  | 90    | 96.7  | 109.6 | 102.7    | 1 |
| 1    | 98.8  | 104.6 | 98.8  | 85.5  | 85.4  | 126.9 | 110.1    | 1 |
| 1    | 108.9 | 88.1  | 113.2 | 94.1  | 76.8  | 118.7 | 106.6667 | 1 |
| 1    | 58.4  | 57.6  | 77.6  | 218.7 | 89.3  | 98.4  | 77.86667 | 1 |
| 1    | 82.5  | 56.5  | 125.8 | 138.2 | 81.3  | 115.7 | 99.33333 | 1 |

|   |       |       |       |       |       |       |          |   |
|---|-------|-------|-------|-------|-------|-------|----------|---|
| 1 | NA       | 0 |
| 1 | 94.8  | 108.7 | 112.7 | 95.4  | 94.5  | 94    | 105.1333 | 1 |
| 1 | NA       | 0 |
| 1 | 79.9  | 82.8  | 131.2 | 97.9  | 104.7 | 103.6 | 105.8667 | 1 |
| 1 | 98.2  | 94.6  | 91.9  | 114.8 | 92.3  | 108.1 | 98.2     | 1 |
| 1 | NA       | 0 |
| 1 | 72    | 94.8  | 118.3 | 101.3 | 112.7 | 100.9 | 104.6667 | 1 |
| 1 | 75.8  | 75.7  | 132.1 | 86.6  | 113.9 | 115.9 | 107.9    | 1 |
| 1 | 109.6 | 90.6  | 88.2  | 108.4 | 94    | 109.2 | 96       | 1 |
| 1 | 111.9 | 112.4 | 127.3 | 81.7  | 86.8  | 79.8  | 106.5    | 1 |
| 1 | NA       | 0 |
| 1 | NA       | 0 |
| 1 | 88.1  | 95.8  | 92.7  | 112.1 | 103   | 108.4 | 98.96667 | 1 |
| 1 | 103.8 | 84.7  | 94.9  | 119.3 | 73.8  | 123.4 | 101      | 1 |
| 1 | 106.1 | 113.3 | 89.1  | 84.7  | 97    | 109.8 | 104.0667 | 1 |
| 1 | NA       | 0 |
| 1 | 90.3  | 106.1 | 119.1 | 88.6  | 91.1  | 104.8 | 110      | 1 |
| 1 | NA       | 0 |
| 1 | 103.1 | 98.9  | 99.3  | 103.3 | 89.8  | 105.6 | 101.2667 | 1 |
| 1 | 111.4 | 89.5  | 95    | 101.3 | 101.1 | 101.5 | 95.33333 | 1 |
| 1 | 84.1  | 76.3  | 103.8 | 108.9 | 97.5  | 129.5 | 103.2    | 1 |
| 1 | NA       | 0 |
| 1 | 89.5  | 85.8  | 102.7 | 104   | 108.6 | 109.4 | 99.3     | 1 |
| 1 | 87.4  | 82.8  | 103   | 111.7 | 84    | 131.2 | 105.6667 | 1 |
| 1 | NA       | 0 |
| 1 | 92.7  | 99.6  | 108.7 | 116.1 | 59.1  | 123.8 | 110.7    | 1 |
| 1 | 101.8 | 111.9 | 94.7  | 90.2  | 92.7  | 108.7 | 105.1    | 1 |
| 1 | 162.5 | 121.5 | 78.1  | 80.1  | 88.8  | 69    | 89.53333 | 1 |
| 1 | 65.7  | 75.4  | 112.9 | 104.9 | 92.7  | 148.4 | 112.2333 | 1 |
| 1 | NA       | 0 |
| 1 | 81.4  | 85.8  | 116.2 | 101.9 | 79.6  | 135.1 | 112.3667 | 1 |
| 1 | 77.3  | 59.3  | 196.2 | 81.9  | 62.8  | 122.5 | 126      | 1 |
| 1 | 88.2  | 89.5  | 112.6 | 88.9  | 100.9 | 120   | 107.3667 | 1 |
| 1 | NA       | 0 |
| 1 | 92.3  | 211.6 | 64.6  | 83.9  | 72.7  | 74.9  | 117.0333 | 1 |
| 1 | 73    | 95.9  | 107   | 108.4 | 88.2  | 127.6 | 110.1667 | 1 |
| 1 | NA       | 0 |
| 1 | NA       | 0 |
| 1 | NA       | 0 |
| 1 | 76.8  | 80.3  | 108.2 | 123.7 | 78.1  | 132.9 | 107.1333 | 1 |
| 1 | 114.4 | 106.5 | 77.1  | 100.8 | 110   | 91.2  | 91.6     | 1 |
| 1 | 92.2  | 91.9  | 120.7 | 104.5 | 92.7  | 98    | 103.5333 | 1 |
| 1 | 89.5  | 88.9  | 98.9  | 89.2  | 92    | 141.5 | 109.7667 | 1 |
| 1 | 84.1  | 79.8  | 73.4  | 176.9 | 112.3 | 73.5  | 75.56667 | 1 |
| 1 | 165.8 | 120.5 | 89.2  | 68.3  | 91.3  | 64.9  | 91.53333 | 1 |
| 1 | 94.9  | 122.2 | 92    | 89    | 101   | 101   | 105.0667 | 1 |
| 1 | 70.2  | 56.2  | 141.8 | 125.9 | 65.3  | 140.6 | 112.8667 | 1 |
| 1 | 96.7  | 95.6  | 90.6  | 102.7 | 110.8 | 103.6 | 96.6     | 1 |
| 1 | 109.5 | 104.8 | 81    | 92    | 126.1 | 86.6  | 90.8     | 1 |
| 1 | 84.3  | 57    | 94.3  | 161.8 | 65.8  | 136.7 | 96       | 1 |
| 1 | 105   | 79.3  | 127.2 | 96.2  | 82.7  | 109.5 | 105.3333 | 1 |



|   |       |       |       |       |       |       |          |   |
|---|-------|-------|-------|-------|-------|-------|----------|---|
| 1 | NA       | 0 |
| 1 | 77    | 80.7  | 99.5  | 97.4  | 163.9 | 81.5  | 87.23333 | 1 |
| 1 | 90.6  | 117.1 | 94.5  | 99.2  | 112.8 | 85.8  | 99.13333 | 1 |
| 1 | 72.7  | 88.2  | 109.4 | 96.1  | 79.3  | 154.2 | 117.2667 | 1 |
| 1 | 94.6  | 81.7  | 108.2 | 92.7  | 67.6  | 155.2 | 115.0333 | 1 |
| 1 | 78.3  | 137.2 | 69.2  | 120.5 | 84.2  | 110.6 | 105.6667 | 1 |
| 1 | NA       | 0 |
| 1 | 98.8  | 79.5  | 111.5 | 99.1  | 102.3 | 108.7 | 99.9     | 1 |
| 1 | 118.1 | 103.7 | 83    | 102.5 | 89.5  | 103.1 | 96.6     | 1 |
| 1 | 64.5  | 99.8  | 116.2 | 91    | 101.3 | 127.2 | 114.4    | 1 |
| 1 | 116.8 | 113.8 | 85.8  | 96.2  | 106.6 | 80.8  | 93.46667 | 1 |
| 1 | 76.4  | 249.3 | 61.7  | 49.8  | 101.1 | 61.7  | 124.2333 | 1 |
| 1 | 141.2 | 91.5  | 95.9  | 75.3  | 120.1 | 76    | 87.8     | 1 |
| 1 | 97.1  | 99    | 94.3  | 120.1 | 95.8  | 93.7  | 95.66667 | 1 |
| 1 | NA       | 0 |
| 1 | 90.4  | 108.4 | 83.7  | 94.6  | 117.9 | 105   | 99.03333 | 1 |
| 1 | 57.8  | 83.8  | 139   | 111.2 | 75.4  | 132.8 | 118.5333 | 1 |
| 1 | 55.5  | 49.8  | 80.8  | 87.3  | 42.9  | 283.7 | 138.1    | 1 |
| 1 | 75.8  | 79.4  | 132.1 | 110.7 | 84.1  | 117.9 | 109.8    | 1 |
| 1 | 70    | 64.1  | 132.6 | 109.9 | 107.8 | 115.6 | 104.1    | 1 |
| 1 | 106   | 116.3 | 66.9  | 78.4  | 139.5 | 93    | 92.06667 | 1 |
| 1 | NA       | 0 |
| 1 | NA       | 0 |
| 1 | NA       | 0 |
| 1 | 133.4 | 116.7 | 59.8  | 74.2  | 103.3 | 112.6 | 96.36667 | 1 |
| 1 | NA       | 0 |
| 1 | 103.2 | 99.4  | 107.9 | 88.1  | 92.9  | 108.4 | 105.2333 | 1 |
| 1 | NA       | 0 |
| 1 | 146.5 | 133.5 | 66.5  | 62.4  | 84.4  | 106.7 | 102.2333 | 1 |
| 1 | NA       | 0 |
| 1 | NA       | 0 |
| 1 | 71.2  | 73.1  | 119.7 | 138.3 | 93.4  | 104.4 | 99.06667 | 1 |
| 1 | 95    | 108.6 | 92.2  | 116.7 | 102.7 | 84.6  | 95.13333 | 1 |
| 1 | 61.4  | 71.8  | 129.8 | 123.8 | 82    | 131.2 | 110.9333 | 1 |
| 1 | 101.8 | 86.5  | 111.2 | 101.2 | 99.1  | 100.1 | 99.26667 | 1 |
| 1 | NA       | 0 |
| 1 | 114.1 | 62.6  | 89.7  | 154.6 | 114   | 65    | 72.43333 | 1 |
| 1 | NA       | 0 |
| 1 | 76.3  | 84.8  | 121   | 102.3 | 77.1  | 138.4 | 114.7333 | 1 |
| 1 | 98.7  | 96.8  | 112.6 | 90.6  | 81.8  | 119.4 | 109.6    | 1 |
| 1 | 97.7  | 123.5 | 83.8  | 82.7  | 126   | 86.3  | 97.86667 | 1 |
| 1 | NA       | 0 |
| 1 | 91.2  | 88.2  | 91.2  | 124.4 | 104.9 | 100.1 | 93.16667 | 1 |
| 1 | NA       | 0 |
| 1 | NA       | 0 |
| 1 | 80.4  | 86.7  | 142.2 | 98.8  | 77.5  | 114.4 | 114.4333 | 1 |
| 1 | 111.3 | 88.3  | 106.2 | 92.8  | 83.4  | 118   | 104.1667 | 1 |
| 1 | NA       | 0 |
| 1 | 87.5  | 110.8 | 93.4  | 107.4 | 99    | 102   | 102.0667 | 1 |
| 1 | 114.7 | 112.8 | 74.5  | 78    | 79.8  | 140.3 | 109.2    | 1 |
| 1 | 100.7 | 83.5  | 89.1  | 94    | 106.5 | 126.2 | 99.6     | 1 |

|   |       |       |       |       |       |       |          |   |
|---|-------|-------|-------|-------|-------|-------|----------|---|
| 1 | NA       | 0 |
| 1 | 111.3 | 88.2  | 94    | 99.9  | 104.6 | 102   | 94.73333 | 1 |
| 1 | 112.7 | 103.5 | 95.6  | 96.6  | 87.8  | 103.9 | 101      | 1 |
| 1 | 84.9  | 89.4  | 92.7  | 105.7 | 110.3 | 117   | 99.7     | 1 |
| 1 | 103.6 | 133.6 | 94.5  | 83.8  | 80.3  | 104.1 | 110.7333 | 1 |
| 1 | 64.8  | 55.1  | 67.8  | 47.2  | 290.5 | 74.7  | 65.86667 | 1 |
| 1 | 111.8 | 194.4 | 70.3  | 73.7  | 77.9  | 71.8  | 112.1667 | 1 |
| 1 | 109.4 | 100.2 | 109.9 | 69.7  | 114.7 | 96    | 102.0333 | 1 |
| 1 | NA       | 0 |
| 1 | NA       | 0 |
| 1 | 98.1  | 101   | 82.3  | 91.9  | 109   | 117.6 | 100.3    | 1 |
| 1 | 116   | 111.5 | 94    | 106.1 | 98.3  | 74.2  | 93.23333 | 1 |
| 1 | 95.6  | 81.9  | 85.8  | 110.7 | 103.4 | 122.6 | 96.76667 | 1 |
| 1 | 94.6  | 96.7  | 107.8 | 102.9 | 89.3  | 108.7 | 104.4    | 1 |
| 1 | NA       | 0 |
| 1 | 83.1  | 73.4  | 148.8 | 90.6  | 85.4  | 118.7 | 113.6333 | 1 |
| 1 | 72.9  | 105.7 | 85.1  | 85.5  | 122.1 | 128.8 | 106.5333 | 1 |
| 1 | NA       | 0 |
| 1 | NA       | 0 |
| 1 | NA       | 0 |
| 1 | 117.4 | 110.3 | 81.9  | 90    | 102.8 | 97.5  | 96.56667 | 1 |
| 1 | 106   | 91.9  | 104.5 | 107.3 | 90.2  | 100.1 | 98.83333 | 1 |
| 1 | 108.7 | 150.5 | 99    | 73.3  | 72.3  | 96.3  | 115.2667 | 1 |
| 1 | 80.9  | 98.3  | 93.2  | 138.7 | 93.4  | 95.5  | 95.66667 | 1 |
| 1 | 82.2  | 160.6 | 87.4  | 96    | 86.6  | 87.2  | 111.7333 | 1 |
| 1 | 64.1  | 50.8  | 102.8 | 141.4 | 64.9  | 176   | 109.8667 | 1 |
| 1 | NA       | 0 |
| 1 | NA       | 0 |
| 1 | 68.5  | 91.9  | 107.5 | 96.4  | 135.4 | 100.3 | 99.9     | 1 |
| 1 | NA       | 0 |
| 1 | NA       | 0 |
| 1 | 94.6  | 81    | 101   | 114.7 | 99.3  | 109.3 | 97.1     | 1 |
| 1 | 90.1  | 92.4  | 132.7 | 102.2 | 84.2  | 98.4  | 107.8333 | 1 |
| 1 | 106.6 | 88.8  | 93.9  | 107.1 | 98.1  | 105.4 | 96.03333 | 1 |
| 1 | NA       | 0 |
| 1 | 92.6  | 89.8  | 95.6  | 102.8 | 81.1  | 138.1 | 107.8333 | 1 |
| 1 | NA       | 0 |
| 1 | 104.4 | 118.1 | 87.8  | 103.7 | 94.5  | 91.6  | 99.16667 | 1 |
| 1 | 97.9  | 99.2  | 100   | 101.8 | 81.9  | 119.1 | 106.1    | 1 |
| 1 | NA       | 0 |
| 1 | NA       | 0 |
| 1 | 107.9 | 104.5 | 90.4  | 103.9 | 104.8 | 88.6  | 94.5     | 1 |
| 1 | 143.4 | 89.3  | 94.2  | 84.9  | 99.5  | 88.7  | 90.73333 | 1 |
| 1 | 125.9 | 130.8 | 102.4 | 55.8  | 84.8  | 100.2 | 111.1333 | 1 |
| 1 | 108.8 | 102   | 80.7  | 119.7 | 106   | 82.9  | 88.53333 | 1 |
| 1 | 117.2 | 111.4 | 78.9  | 115.4 | 83    | 94.1  | 94.8     | 1 |
| 1 | 74.1  | 96.9  | 96.5  | 96.5  | 133.6 | 102.3 | 98.56667 | 1 |
| 1 | 116.8 | 76.5  | 104   | 112.4 | 99.9  | 90.4  | 90.3     | 1 |
| 1 | 91.9  | 99.3  | 109.4 | 106   | 90    | 103.5 | 104.0667 | 1 |
| 1 | 84    | 130.7 | 94.9  | 99.6  | 105.1 | 85.7  | 103.7667 | 1 |
| 1 | 143.1 | 121.1 | 99.2  | 75.3  | 69.5  | 91.8  | 104.0333 | 1 |

|   |       |       |       |       |       |       |          |          |
|---|-------|-------|-------|-------|-------|-------|----------|----------|
| 1 | 78.3  | 87.1  | 109.8 | 96.7  | 98.7  | 129.4 | 108.7667 | 1        |
| 1 | 103.1 | 98.8  | 96.8  | 103.5 | 102.2 | 95.5  | 97.03333 | 1        |
| 1 | 20.4  | 13.9  | 263.3 | 128.2 | 11.8  | 162.5 | 146.5667 | 1        |
| 1 | 99.4  | 81.2  | 93.7  | 98.4  | 91.9  | 135.3 | 103.4    | 1        |
| 1 | NA       | 0        |
| 1 | NA       | 0        |
| 1 | 64.1  | 78.2  | 96.6  | 139.4 | 77.4  | 144.3 | 106.3667 | 1        |
| 1 | 134.7 | 90.4  | 86.1  | 113.6 | 88.9  | 86.3  | 87.6     | 1        |
| 1 | 95.9  | 88    | 91.5  | 85.8  | 98.6  | 140.3 | 106.6    | 1        |
| 1 | NA       | 0        |
| 1 | NA       | 0        |
| 1 | 81.2  | 76.5  | 123.8 | 96.7  | 120.4 | 101.4 | 100.5667 | 1        |
| 1 | 101.3 | 107.1 | 104.2 | 100.8 | 115.8 | 70.9  | 94.06667 | 1        |
| 1 | 112.1 | 89.7  | 94.8  | 116.9 | 93.3  | 93.3  | 92.6     | 1        |
| 1 | NA    | 223.8 | NA    | 183.2 | NA    | 193.1 | 208.45   | 0.666667 |
| 1 | NA       | 0        |
| 1 | NA       | 0        |
| 1 | NA       | 0        |
| 1 | 128.9 | 90.3  | 84.1  | 99.3  | 122   | 75.4  | 83.26667 | 1        |
| 1 | NA       | 0        |
| 1 | NA       | 0        |
| 1 | 66.4  | 55.2  | 171.2 | 108.4 | 83.1  | 115.7 | 114.0333 | 1        |
| 1 | 101.9 | 89.3  | 67.3  | 69.2  | 35.8  | 236.4 | 131      | 1        |
| 1 | 283   | 155.1 | 56.1  | 21.4  | 67.5  | 16.9  | 76.03333 | 1        |
| 1 | NA       | 0        |
| 1 | NA       | 0        |
| 1 | 99.3  | 121   | 91.7  | 83.7  | 113.6 | 90.6  | 101.1    | 1        |
| 1 | 86.6  | 135.5 | 94.8  | 68.8  | 147.4 | 66.8  | 99.03333 | 1        |
| 1 | NA       | 0        |
| 1 | NA       | 0        |
| 1 | NA       | 0        |
| 1 | NA       | 0        |
| 1 | 183   | 103.6 | 79.1  | 65.1  | 130.1 | 39.2  | 73.96667 | 1        |
| 1 | NA       | 0        |
| 1 | 120.9 | 107.1 | 88    | 93    | 101.3 | 89.7  | 94.93333 | 1        |
| 1 | 88.9  | 102.2 | 109.8 | 95.7  | 110.6 | 92.9  | 101.6333 | 1        |
| 1 | NA       | 0        |
| 1 | 95.8  | 88.2  | 96.9  | 117.3 | 99.1  | 102.9 | 96       | 1        |
| 1 | 88.1  | 110.1 | 132.5 | 89.9  | 84.3  | 95.1  | 112.5667 | 1        |
| 1 | 125.2 | 96.5  | 87    | 85.7  | 115.3 | 90.3  | 91.26667 | 1        |
| 1 | 87.8  | 125.7 | 95.1  | 80    | 110.3 | 101   | 107.2667 | 1        |
| 1 | 89.7  | 76.9  | 110.5 | 114.6 | 94.8  | 113.5 | 100.3    | 1        |
| 1 | 97.8  | 89.6  | 81.3  | 109.9 | 113.5 | 107.9 | 92.93333 | 1        |
| 1 | 116.3 | 116.5 | 111.4 | 60    | 113.1 | 82.7  | 103.5333 | 1        |
| 1 | 48.9  | 52.9  | 83.1  | 104   | 74.5  | 236.6 | 124.2    | 1        |
| 1 | NA       | 0        |
| 1 | 95.3  | 85.6  | 86.4  | 91.7  | 125.3 | 115.6 | 95.86667 | 1        |
| 1 | 100.2 | 94.2  | 102.8 | 94.9  | 98.8  | 109.1 | 102.0333 | 1        |
| 1 | 87.1  | 68.3  | 135.3 | 98.1  | 87.9  | 123.2 | 108.9333 | 1        |
| 1 | 86.3  | 131.6 | 104.6 | 95.5  | 91.4  | 90.6  | 108.9333 | 1        |
| 1 | 73.6  | 74.3  | 221.1 | 96.8  | 69.2  | 65    | 120.1333 | 1        |





| Group_con | Group_con | Group_casp | value    |
|-----------|-----------|------------|----------|
| 121.8     | 1         | 0.64231    | 0.000774 |
| 129.4667  | 1         | 0.544799   | 0.083204 |
| NA        | 0         | NA         | NA       |
| 110.8667  | 1         | 0.803668   | 0.587124 |
| 121.3     | 1         | 0.64853    | 0.521299 |
| 90.46667  | 1         | 1.211496   | 0.355231 |
| 90.9      | 1         | 1.20022    | 0.333613 |
| 116.9     | 1         | 0.711149   | 0.224789 |
| 116.4     | 1         | 0.718499   | 0.218803 |
| 117.2333  | 1         | 0.706284   | 0.097746 |
| 103.3     | 1         | 0.936108   | 0.747447 |
| 102.1667  | 1         | 0.957586   | 0.784881 |
| 112.5333  | 1         | 0.777251   | 0.323335 |
| 88.96667  | 1         | 1.247658   | 0.517769 |
| 92.26667  | 1         | 1.167991   | 0.731103 |
| 85.7      | 1         | 1.333722   | 0.499378 |
| 103.1667  | 1         | 0.938934   | 0.737434 |
| 94.23333  | 1         | 1.122391   | 0.605484 |
| 81.23333  | 1         | 1.462043   | 0.039979 |
| 102.3667  | 1         | 0.953761   | 0.696943 |
| NA        | 0         | NA         | NA       |
| 106.5667  | 1         | 0.876447   | 0.356273 |
| 113.9333  | 1         | 0.755413   | 0.302719 |
| 103.4333  | 1         | 0.93329    | 0.403828 |
| 112.6     | 1         | 0.776199   | 0.513297 |
| 103.4     | 1         | 0.934558   | 0.769526 |
| 130.7     | 1         | 0.530222   | 0.378884 |
| 66.36667  | 1         | 2.013561   | 0.412388 |
| 97.2      | 1         | 1.057613   | 0.748534 |
| 104.0667  | 1         | 0.921525   | 0.698031 |
| 99.96667  | 1         | 1.000667   | 0.99287  |
| 81.76667  | 1         | 1.445577   | 0.256345 |
| 106.2     | 1         | 0.883553   | 0.73738  |
| 92.4      | 1         | 1.164141   | 0.465557 |
| 93.86667  | 1         | 1.130682   | 0.153807 |
| 109       | 1         | 0.834862   | 0.140894 |
| 104.1     | 1         | 0.920909   | 0.766133 |
| 122.0667  | 1         | 0.638449   | 0.348866 |
| 111.8     | 1         | 0.788611   | 0.394864 |
| 110.6667  | 1         | 0.807229   | 0.296879 |
| 101.9333  | 1         | 0.961413   | 0.891301 |
| 114.3     | 1         | 0.749781   | 0.166452 |
| 81.93333  | 1         | 1.441416   | 0.184695 |
| 88.7      | 1         | 1.255167   | 0.289882 |
| 73.93333  | 1         | 1.704689   | 0.249458 |
| 103.6     | 1         | 0.930502   | 0.549751 |
| 102.2333  | 1         | 0.956309   | 0.828802 |
| 104.6667  | 1         | 0.910828   | 0.521358 |
| 106.1667  | 1         | 0.88383    | 0.713046 |
| 108.5333  | 1         | 0.842445   | 0.549969 |

|          |   |          |          |
|----------|---|----------|----------|
| 97.86667 | 1 | 1.043256 | 0.934171 |
| 104.3    | 1 | 0.917546 | 0.857577 |
| 105.1    | 1 | 0.90295  | 0.805219 |
| 99.96667 | 1 | 1.000333 | 0.998575 |
| 98.86667 | 1 | 1.022927 | 0.95849  |
| 106.3333 | 1 | 0.880564 | 0.700267 |
| 70.96667 | 1 | 1.818225 | 0.23295  |
| 92.76667 | 1 | 1.155947 | 0.40016  |
| 90.73333 | 1 | 1.204262 | 0.471953 |
| 90.6     | 1 | 1.207873 | 0.508355 |
| 91.56667 | 1 | 1.184201 | 0.726112 |
| 95.1     | 1 | 1.1034   | 0.734738 |
| 93.73333 | 1 | 1.133713 | 0.680063 |
| NA       | 0 | NA       | NA       |
| 93.7     | 1 | 1.134116 | 0.613566 |
| NA       | 0 | NA       | NA       |
| 71.16667 | 1 | 1.810304 | 0.245906 |
| NA       | 0 | NA       | NA       |
| 107.0333 | 1 | 0.868577 | 0.280376 |
| 82.33333 | 1 | 1.428745 | 0.572283 |
| 79.23333 | 1 | 1.52419  | 0.476662 |
| 102.8    | 1 | 0.945525 | 0.799358 |
| 124.8667 | 1 | 0.601975 | 0.53602  |
| 114.7667 | 1 | 0.742376 | 0.012131 |
| 111      | 1 | 0.801502 | 0.638728 |
| 101.5333 | 1 | 0.970125 | 0.96795  |
| 108.9667 | 1 | 0.835424 | 0.54266  |
| 87.86667 | 1 | 1.276555 | 0.240829 |
| 51.96667 | 1 | 2.847979 | 0.207183 |
| 68.6     | 1 | 1.914966 | 0.272735 |
| 88.26667 | 1 | 1.266239 | 0.388872 |
| 111.7333 | 1 | 0.789678 | 0.310452 |
| 104.6    | 1 | 0.912046 | 0.59862  |
| 90.76667 | 1 | 1.203452 | 0.565649 |
| 99.83333 | 1 | 1.003339 | 0.972951 |
| 86.86667 | 1 | 1.302379 | 0.001991 |
| 84.8     | 1 | 1.358491 | 0.340893 |
| 110.6    | 1 | 0.80862  | 0.027227 |
| 109.8    | 1 | 0.821797 | 0.468488 |
| 91.33333 | 1 | 1.190146 | 0.189476 |
| 89.73333 | 1 | 1.228826 | 0.335753 |
| 83.63333 | 1 | 1.39179  | 0.453301 |
| 94.9     | 1 | 1.107482 | 0.580625 |
| 83.83333 | 1 | 1.386083 | 0.081078 |
| 92.93333 | 1 | 1.152439 | 0.570399 |
| 85.1     | 1 | 1.350176 | 0.473455 |
| 91.43333 | 1 | 1.187386 | 0.269222 |
| 84.63333 | 1 | 1.363135 | 0.377495 |
| 90.26667 | 1 | 1.215657 | 0.502784 |
| 100.8    | 1 | 0.983796 | 0.95301  |
| 89.86667 | 1 | 1.225519 | 0.423081 |

|          |   |          |          |
|----------|---|----------|----------|
| 91.7     | 1 | 1.181025 | 0.634341 |
| 99.2     | 1 | 1.016465 | 0.94378  |
| 99.46667 | 1 | 1.011059 | 0.934973 |
| 95.76667 | 1 | 1.088409 | 0.661627 |
| 107.7333 | 1 | 0.856436 | 0.676926 |
| 101.1667 | 1 | 0.976606 | 0.665666 |
| 92.66667 | 1 | 1.157914 | 0.594686 |
| 93.9     | 1 | 1.12957  | 0.408545 |
| 96.96667 | 1 | 1.062908 | 0.620794 |
| 70.06667 | 1 | 1.854424 | 0.207807 |
| 84.03333 | 1 | 1.380008 | 0.430664 |
| 96.53333 | 1 | 1.071823 | 0.581737 |
| 99.1     | 1 | 1.018163 | 0.957813 |
| 89.76667 | 1 | 1.227999 | 0.21768  |
| 97.43333 | 1 | 1.052686 | 0.836677 |
| 100.8    | 1 | 0.984458 | 0.941511 |
| 92.1     | 1 | 1.171553 | 0.414711 |
| 72.1     | 1 | 1.773925 | 0.162649 |
| 104.7333 | 1 | 0.909612 | 0.414569 |
| 93.66667 | 1 | 1.134875 | 0.254689 |
| 86.03333 | 1 | 1.325068 | 0.356825 |
| 101.7    | 1 | 0.966568 | 0.631    |
| 78.66667 | 1 | 1.542373 | 0.211043 |
| 83.06667 | 1 | 1.407705 | 0.349831 |
| 105.7333 | 1 | 0.891866 | 0.328276 |
| 98.36667 | 1 | 1.033209 | 0.836389 |
| 116.6667 | 1 | 0.714286 | 0.004245 |
| 93.03333 | 1 | 1.150125 | 0.510689 |
| 87.63333 | 1 | 1.282237 | 0.157444 |
| 105.5667 | 1 | 0.894222 | 0.492122 |
| 101.8    | 1 | 0.964309 | 0.912912 |
| 99.86667 | 1 | 1.00267  | 0.991771 |
| 116.7667 | 1 | 0.713103 | 0.030863 |
| 94.93333 | 1 | 1.10639  | 0.592752 |
| 108.3667 | 1 | 0.845586 | 0.485462 |
| 94.06667 | 1 | 1.126152 | 0.571444 |
| 106.6333 | 1 | 0.875899 | 0.594993 |
| 102.7333 | 1 | 0.946788 | 0.792188 |
| 95.5     | 1 | 1.094241 | 0.365167 |
| 111.7333 | 1 | 0.789678 | 0.068909 |
| 78.96667 | 1 | 1.532292 | 0.494296 |
| 90.2     | 1 | 1.217664 | 0.647767 |
| 90.03333 | 1 | 1.22177  | 0.704719 |
| 123.1667 | 1 | 0.624087 | 0.434212 |
| 90.5     | 1 | 1.209945 | 0.421188 |
| 85.53333 | 1 | 1.33827  | 0.398993 |
| 97.9     | 1 | 1.042901 | 0.582765 |
| 100.4333 | 1 | 0.991039 | 0.974702 |
| 107.2667 | 1 | 0.864823 | 0.502364 |
| 107.4    | 1 | 0.861887 | 0.287571 |
| 93.5     | 1 | 1.139037 | 0.294016 |

|          |   |          |          |
|----------|---|----------|----------|
| 107.6667 | 1 | 0.857585 | 0.098879 |
| 104.1333 | 1 | 0.920615 | 0.275395 |
| 86       | 1 | 1.325581 | 0.376613 |
| 111.9    | 1 | 0.78731  | 0.587413 |
| 85.23333 | 1 | 1.346891 | 0.141959 |
| 111.9    | 1 | 0.787608 | 0.244722 |
| 99.63333 | 1 | 1.008029 | 0.947552 |
| 84.26667 | 1 | 1.373418 | 0.250669 |
| 106.9667 | 1 | 0.869741 | 0.470001 |
| 78.13333 | 1 | 1.560154 | 0.374365 |
| 90.8     | 1 | 1.202643 | 0.617153 |
| 89.33333 | 1 | 1.238433 | 0.479144 |
| 105.1667 | 1 | 0.90206  | 0.623252 |
| 123.9    | 1 | 0.613936 | 0.462893 |
| 96.66667 | 1 | 1.06931  | 0.426992 |
| 118.2333 | 1 | 0.691288 | 0.018626 |
| 89.9     | 1 | 1.224694 | 0.422779 |
| 102.0333 | 1 | 0.960144 | 0.875937 |
| 96.46667 | 1 | 1.073255 | 0.79226  |
| 98.66667 | 1 | 1.027027 | 0.73532  |
| 94.63333 | 1 | 1.113068 | 0.645529 |
| 116.6    | 1 | 0.715266 | 0.010182 |
| 88.36667 | 1 | 1.263297 | 0.504294 |
| 110.9333 | 1 | 0.802885 | 0.204187 |
| 95.53333 | 1 | 1.09351  | 0.801991 |
| 88.9     | 1 | 1.249719 | 0.520568 |
| 55.33333 | 1 | 2.614458 | 0.289127 |
| 102.9667 | 1 | 0.942376 | 0.808396 |
| 92.76667 | 1 | 1.155947 | 0.443663 |
| 95.06667 | 1 | 1.104137 | 0.648965 |
| 98.56667 | 1 | 1.029084 | 0.925032 |
| 118.5333 | 1 | 0.687289 | 0.221211 |
| 85.7     | 1 | 1.333722 | 0.304437 |
| 99.73333 | 1 | 1.005013 | 0.985914 |
| 88.26667 | 1 | 1.265483 | 0.351807 |
| 106.3    | 1 | 0.882095 | 0.607574 |
| 78       | 1 | 1.564103 | 0.040295 |
| 103.1333 | 1 | 0.938914 | 0.74519  |
| 105.2    | 1 | 0.901458 | 0.687112 |
| 88.83333 | 1 | 1.251032 | 0.391567 |
| 96.1     | 1 | 1.081165 | 0.545176 |
| 97.2     | 1 | 1.057613 | 0.612145 |
| 99.4     | 1 | 1.011737 | 0.958183 |
| 82.1     | 1 | 1.43646  | 0.252088 |
| 90.26667 | 1 | 1.215288 | 0.312468 |
| 117.1    | 1 | 0.708227 | 0.010569 |
| 97.36667 | 1 | 1.054433 | 0.393258 |
| 92       | 1 | 1.174275 | 0.624954 |
| 114.5667 | 1 | 0.745708 | 0.161825 |
| 107.1    | 1 | 0.867414 | 0.25596  |
| 99.76667 | 1 | 1.005012 | 0.983494 |

|          |   |          |          |
|----------|---|----------|----------|
| 94.03333 | 1 | 1.12726  | 0.542558 |
| 98.73333 | 1 | 1.025321 | 0.778368 |
| 115.5    | 1 | 0.731602 | 0.025872 |
| 95.1     | 1 | 1.102348 | 0.718358 |
| 110.9667 | 1 | 0.802343 | 0.407943 |
| 119.9    | 1 | 0.668335 | 0.260279 |
| 83.63333 | 1 | 1.390992 | 0.446856 |
| 90.73333 | 1 | 1.204629 | 0.466104 |
| 108.5667 | 1 | 0.842186 | 0.497978 |
| 150.3333 | 1 | 0.330155 | 0.441082 |
| 94.33333 | 1 | 1.120495 | 0.509757 |
| 118.4    | 1 | 0.689189 | 0.363721 |
| 110.8667 | 1 | 0.803969 | 0.077524 |
| 97.93333 | 1 | 1.041865 | 0.775672 |
| 76       | 1 | 1.632018 | 0.272666 |
| 115.2    | 1 | 0.736111 | 0.06733  |
| 110.8333 | 1 | 0.804511 | 0.538896 |
| 94.76667 | 1 | 1.110798 | 0.697015 |
| 89.8     | 1 | 1.227171 | 0.553514 |
| 81.8     | 1 | 1.444988 | 0.382014 |
| 86.1     | 1 | 1.323268 | 0.509499 |
| 89.4     | 1 | 1.237136 | 0.260523 |
| 88.56667 | 1 | 1.258186 | 0.3824   |
| 111.3    | 1 | 0.796945 | 0.286565 |
| 115.9667 | 1 | 0.724634 | 0.040167 |
| 90       | 1 | 1.221852 | 0.246383 |
| 76       | 1 | 1.631579 | 0.196616 |
| 89.96667 | 1 | 1.222675 | 0.440687 |
| 74.9     | 1 | 1.669782 | 0.279071 |
| 96.13333 | 1 | 1.080097 | 0.244736 |
| 97.63333 | 1 | 1.049164 | 0.760168 |
| 96.2     | 1 | 1.078656 | 0.597788 |
| 119.7333 | 1 | 0.6701   | 0.242982 |
| 88.53333 | 1 | 1.25866  | 0.264457 |
| 107.9333 | 1 | 0.852996 | 0.611732 |
| 90.03333 | 1 | 1.221029 | 0.413365 |
| 99.36667 | 1 | 1.012747 | 0.955141 |
| 108.1333 | 1 | 0.849568 | 0.351674 |
| 106.1333 | 1 | 0.884422 | 0.483211 |
| 88.96667 | 1 | 1.248033 | 0.143511 |
| 110.7667 | 1 | 0.805597 | 0.592734 |
| 88.93333 | 1 | 1.248501 | 0.06123  |
| 87.86667 | 1 | 1.276176 | 0.336434 |
| 85.7     | 1 | 1.334111 | 0.420302 |
| 95.73333 | 1 | 1.088788 | 0.617069 |
| 108.7    | 1 | 0.839926 | 0.714241 |
| 94.26667 | 1 | 1.121641 | 0.033195 |
| 98.66667 | 1 | 1.027027 | 0.731903 |
| 96.06667 | 1 | 1.081888 | 0.305595 |
| 103.6667 | 1 | 0.929582 | 0.812793 |
| 87.13333 | 1 | 1.295715 | 0.299401 |

|          |   |          |          |
|----------|---|----------|----------|
| 95.4     | 1 | 1.096436 | 0.801237 |
| 89.46667 | 1 | 1.235469 | 0.441356 |
| 87.46667 | 1 | 1.286585 | 0.30812  |
| 97.83333 | 1 | 1.044293 | 0.790729 |
| 100.7333 | 1 | 0.98544  | 0.953091 |
| 112.1667 | 1 | 0.783061 | 0.233168 |
| 75.46667 | 1 | 1.650177 | 0.237719 |
| 99.93333 | 1 | 1.001334 | 0.976555 |
| 98.16667 | 1 | 1.037351 | 0.786306 |
| 90.16667 | 1 | 1.217745 | 0.249484 |
| 110.1    | 1 | 0.81653  | 0.439601 |
| 84.53333 | 1 | 1.365931 | 0.36942  |
| 108.2    | 1 | 0.848121 | 0.048418 |
| 94.2     | 1 | 1.122788 | 0.394782 |
| 125      | 1 | 0.600267 | 0.154859 |
| 114.7667 | 1 | 0.742957 | 0.154553 |
| 102.2333 | 1 | 0.956309 | 0.943123 |
| 88.9     | 1 | 1.250469 | 0.493357 |
| 90.2     | 1 | 1.217295 | 0.369155 |
| 97.1     | 1 | 1.060076 | 0.720629 |
| 72.9     | 1 | 1.743484 | 0.343045 |
| 93.36667 | 1 | 1.142092 | 0.399252 |
| 100.3333 | 1 | 0.993023 | 0.974534 |
| 99.63333 | 1 | 1.00736  | 0.95918  |
| 97.43333 | 1 | 1.052686 | 0.70593  |
| 106      | 1 | 0.887107 | 0.33951  |
| 80.63333 | 1 | 1.480364 | 0.423749 |
| 103.0667 | 1 | 0.940492 | 0.725976 |
| 88.5     | 1 | 1.259887 | 0.17854  |
| 96.2     | 1 | 1.079002 | 0.738558 |
| 92.63333 | 1 | 1.15941  | 0.211325 |
| 113.6667 | 1 | 0.759531 | 0.506437 |
| 100.8333 | 1 | 0.983471 | 0.900123 |
| 74.8     | 1 | 1.674242 | 0.221507 |
| 94.63333 | 1 | 1.11342  | 0.691132 |
| 122.4333 | 1 | 0.633542 | 0.029148 |
| 95.8     | 1 | 1.087683 | 0.482102 |
| 116.5667 | 1 | 0.71547  | 0.180949 |
| 96.56667 | 1 | 1.071108 | 0.767    |
| 104.4    | 1 | 0.915709 | 0.59831  |
| 101      | 1 | 0.980198 | 0.916399 |
| 89.26667 | 1 | 1.240478 | 0.497129 |
| 99.4     | 1 | 1.011737 | 0.773781 |
| 121.9    | 1 | 0.640416 | 0.08916  |
| 91.53333 | 1 | 1.184996 | 0.547948 |
| 91.16667 | 1 | 1.193784 | 0.290615 |
| 95.7     | 1 | 1.089864 | 0.338773 |
| 89.96667 | 1 | 1.223416 | 0.519084 |
| 109.3667 | 1 | 0.828711 | 0.682691 |
| 89.1     | 1 | 1.244669 | 0.366413 |
| 111.8667 | 1 | 0.787843 | 0.440624 |

|          |   |          |          |
|----------|---|----------|----------|
| 101.1667 | 1 | 0.977265 | 0.782063 |
| 88.16667 | 1 | 1.268809 | 0.631183 |
| 83.2     | 1 | 1.403846 | 0.434699 |
| 105.8    | 1 | 0.890359 | 0.591952 |
| 95.63333 | 1 | 1.091321 | 0.400588 |
| 85.1     | 1 | 1.350176 | 0.540079 |
| 91.06667 | 1 | 1.196193 | 0.07585  |
| 103.1667 | 1 | 0.938611 | 0.5827   |
| 90       | 1 | 1.222222 | 0.368624 |
| 109.2    | 1 | 0.831807 | 0.290246 |
| 116.4333 | 1 | 0.717721 | 0.135707 |
| 107.3333 | 1 | 0.863354 | 0.624694 |
| 100.1333 | 1 | 0.99767  | 0.983305 |
| 106.1333 | 1 | 0.884108 | 0.712164 |
| 101.2    | 1 | 0.975955 | 0.905694 |
| 92.9     | 1 | 1.152853 | 0.316781 |
| 95.83333 | 1 | 1.086957 | 0.693969 |
| 101.7333 | 1 | 0.965596 | 0.799945 |
| 114.1333 | 1 | 0.752336 | 0.110222 |
| 92.83333 | 1 | 1.154758 | 0.298728 |
| 92.7     | 1 | 1.157497 | 0.521399 |
| 100.1667 | 1 | 0.996672 | 0.986268 |
| 111.9333 | 1 | 0.78648  | 0.441877 |
| 113.1333 | 1 | 0.76812  | 0.165908 |
| 97.23333 | 1 | 1.056565 | 0.533683 |
| 122.7    | 1 | 0.62972  | 0.103708 |
| 87.23333 | 1 | 1.293084 | 0.361113 |
| 99.23333 | 1 | 1.015116 | 0.901955 |
| 95.76667 | 1 | 1.088409 | 0.473817 |
| 95.46667 | 1 | 1.094972 | 0.516994 |
| 99.73333 | 1 | 1.005348 | 0.961703 |
| 102.0667 | 1 | 0.959504 | 0.853486 |
| 105.1333 | 1 | 0.902029 | 0.051584 |
| 95.63333 | 1 | 1.09167  | 0.514996 |
| 102.6333 | 1 | 0.948685 | 0.822643 |
| 97.2     | 1 | 1.05727  | 0.62359  |
| 65.76667 | 1 | 2.041561 | 0.205719 |
| 78.06667 | 1 | 1.561913 | 0.271164 |
| 111.2333 | 1 | 0.798022 | 0.278988 |
| 78       | 1 | 1.56453  | 0.228388 |
| 118.5    | 1 | 0.687764 | 0.008187 |
| 93.66667 | 1 | 1.134875 | 0.411692 |
| 98.83333 | 1 | 1.023609 | 0.914046 |
| 97.5     | 1 | 1.051282 | 0.506922 |
| 104.6667 | 1 | 0.910828 | 0.703245 |
| 80.76667 | 1 | 1.476269 | 0.188669 |
| 87.76667 | 1 | 1.279149 | 0.258449 |
| 111.5333 | 1 | 0.793186 | 0.124259 |
| 100.6333 | 1 | 0.987413 | 0.954216 |
| 90.86667 | 1 | 1.20066  | 0.099498 |
| 96.96667 | 1 | 1.062221 | 0.406671 |



|          |   |          |          |
|----------|---|----------|----------|
| 112.4    | 1 | 0.779359 | 0.080183 |
| 87.36667 | 1 | 1.289203 | 0.316763 |
| 106.6333 | 1 | 0.875586 | 0.260391 |
| 101.9333 | 1 | 0.962067 | 0.705289 |
| 99.4     | 1 | 1.012072 | 0.938258 |
| 113.1    | 1 | 0.768347 | 0.283259 |
| 106.4    | 1 | 0.879699 | 0.007497 |
| 87.83333 | 1 | 1.27704  | 0.297812 |
| 108.2    | 1 | 0.848429 | 0.668264 |
| 89.66667 | 1 | 1.230855 | 0.456689 |
| 100.8333 | 1 | 0.983802 | 0.818618 |
| 84.33333 | 1 | 1.371542 | 0.230317 |
| 98.5     | 1 | 1.030457 | 0.841216 |
| 99.1     | 1 | 1.018163 | 0.893115 |
| 79.93333 | 1 | 1.502085 | 0.334423 |
| 111.1    | 1 | 0.79958  | 0.279944 |
| 90.46667 | 1 | 1.211127 | 0.22104  |
| 120.6    | 1 | 0.658651 | 0.008306 |
| 94.3     | 1 | 1.120537 | 0.488732 |
| 98.33333 | 1 | 1.033898 | 0.820465 |
| 96.3     | 1 | 1.077189 | 0.389898 |
| 103.2    | 1 | 0.937984 | 0.689406 |
| 74.83333 | 1 | 1.673051 | 0.213029 |
| 99.4     | 1 | 1.012072 | 0.959733 |
| 99.46667 | 1 | 1.010724 | 0.779487 |
| 91.93333 | 1 | 1.175489 | 0.205858 |
| 111.3333 | 1 | 0.796407 | 0.130174 |
| 98.46667 | 1 | 1.031144 | 0.809969 |
| 99.4     | 1 | 1.012408 | 0.933364 |
| 95.33333 | 1 | 1.097552 | 0.681222 |
| 91.56667 | 1 | 1.184201 | 0.629224 |
| 81       | 1 | 1.469547 | 0.236421 |
| 108.9    | 1 | 0.836547 | 0.390657 |
| 94.06667 | 1 | 1.126152 | 0.665095 |
| 97.73333 | 1 | 1.046385 | 0.609379 |
| 101.9    | 1 | 0.962709 | 0.847734 |
| 101.9    | 1 | 0.962381 | 0.708472 |
| 109.3333 | 1 | 0.829268 | 0.07598  |
| 99.63333 | 1 | 1.00736  | 0.88752  |
| 89.83333 | 1 | 1.226345 | 0.611799 |
| 104.9667 | 1 | 0.905367 | 0.672592 |
| 85.96667 | 1 | 1.326483 | 0.460449 |
| 97.46667 | 1 | 1.051984 | 0.449526 |
| 135.5667 | 1 | 0.475289 | 0.410694 |
| 103.8    | 1 | 0.926461 | 0.242212 |
| 95.4     | 1 | 1.096436 | 0.277728 |
| 99.03333 | 1 | 1.019522 | 0.937131 |
| 113.7333 | 1 | 0.758792 | 0.140041 |
| 99.03333 | 1 | 1.019185 | 0.811931 |
| 105.2333 | 1 | 0.900538 | 0.575078 |
| 96.73333 | 1 | 1.06754  | 0.895412 |

|          |   |          |          |
|----------|---|----------|----------|
| 92.9     | 1 | 1.152853 | 0.550162 |
| 101.5667 | 1 | 0.968822 | 0.839022 |
| 95.66667 | 1 | 1.090592 | 0.637924 |
| 89.03333 | 1 | 1.246724 | 0.373151 |
| 92.86667 | 1 | 1.153625 | 0.582268 |
| 96.36667 | 1 | 1.075406 | 0.49144  |
| 87.56667 | 1 | 1.284355 | 0.356813 |
| 97.86667 | 1 | 1.043597 | 0.930912 |
| 88.33333 | 1 | 1.264151 | 0.190782 |
| 112.8667 | 1 | 0.772002 | 0.292922 |
| 92.53333 | 1 | 1.161383 | 0.636242 |
| 90.13333 | 1 | 1.219305 | 0.363615 |
| 86.83333 | 1 | 1.303263 | 0.290346 |
| 97.23333 | 1 | 1.057251 | 0.690787 |
| 101.9667 | 1 | 0.961098 | 0.688346 |
| 86.46667 | 1 | 1.31303  | 0.170141 |
| 86.4     | 1 | 1.314815 | 0.135501 |
| 98.46667 | 1 | 1.031144 | 0.880234 |
| 93.9     | 1 | 1.13028  | 0.333284 |
| 96.96667 | 1 | 1.062564 | 0.339135 |
| 94.63333 | 1 | 1.113068 | 0.40078  |
| 96.36667 | 1 | 1.075061 | 0.61684  |
| 90.06667 | 1 | 1.220207 | 0.223165 |
| 88.5     | 1 | 1.259887 | 0.112253 |
| 115.1    | 1 | 0.73733  | 0.177187 |
| 112.7667 | 1 | 0.773869 | 0.447502 |
| 99.56667 | 1 | 1.008704 | 0.944816 |
| 92.23333 | 1 | 1.169136 | 0.152799 |
| 97.43333 | 1 | 1.053028 | 0.509995 |
| 119.0667 | 1 | 0.679451 | 0.081834 |
| NA       | 0 | NA       | NA       |
| 96       | 1 | 1.083333 | 0.030721 |
| 115.3667 | 1 | 0.733892 | 0.466773 |
| 87.6     | 1 | 1.283105 | 0.298909 |
| 115.6    | 1 | 0.730104 | 0.432375 |
| 109.0667 | 1 | 0.833741 | 0.143971 |
| 101.8333 | 1 | 0.964321 | 0.901881 |
| 99.73333 | 1 | 1.005348 | 0.98979  |
| 104.8    | 1 | 0.908715 | 0.606885 |
| 93.6     | 1 | 1.136752 | 0.463764 |
| 102.2667 | 1 | 0.955671 | 0.710732 |
| 101.4667 | 1 | 0.971419 | 0.789709 |
| 95.76667 | 1 | 1.088409 | 0.606278 |
| 109.0333 | 1 | 0.833996 | 0.120479 |
| 95.26667 | 1 | 1.09937  | 0.634923 |
| 70.6     | 1 | 1.832389 | 0.40189  |
| 112.2667 | 1 | 0.781473 | 0.051208 |
| 98.53333 | 1 | 1.029432 | 0.796649 |
| 93.96667 | 1 | 1.128414 | 0.515139 |
| 96.93333 | 1 | 1.06293  | 0.652277 |
| 94.33333 | 1 | 1.120141 | 0.585474 |

|          |   |          |          |
|----------|---|----------|----------|
| 99.63333 | 1 | 1.00736  | 0.919306 |
| 89.96667 | 1 | 1.223046 | 0.421138 |
| 94.63333 | 1 | 1.113772 | 0.545689 |
| 95.96667 | 1 | 1.084404 | 0.434957 |
| 117      | 1 | 0.709117 | 0.379986 |
| 84.6     | 1 | 1.364066 | 0.203369 |
| 87.76667 | 1 | 1.279149 | 0.244256 |
| 79.43333 | 1 | 1.518254 | 0.130341 |
| 100.1667 | 1 | 0.997005 | 0.977358 |
| 91.33333 | 1 | 1.189781 | 0.552606 |
| 98.23333 | 1 | 1.035969 | 0.551049 |
| 93.13333 | 1 | 1.147459 | 0.215754 |
| 101.6    | 1 | 0.968176 | 0.917324 |
| 98.23333 | 1 | 1.035629 | 0.707756 |
| 99.33333 | 1 | 1.013423 | 0.871662 |
| 106.3333 | 1 | 0.881191 | 0.245445 |
| 82.16667 | 1 | 1.433671 | 0.342711 |
| 108.6333 | 1 | 0.841056 | 0.006771 |
| 94.96667 | 1 | 1.105651 | 0.648959 |
| 97.03333 | 1 | 1.061491 | 0.570005 |
| 99.33333 | 1 | 1.013423 | 0.855196 |
| 94.13333 | 1 | 1.124646 | 0.77581  |
| 103.1333 | 1 | 0.93956  | 0.702042 |
| 105      | 1 | 0.905079 | 0.417027 |
| 100.9    | 1 | 0.982491 | 0.830626 |
| 83.5     | 1 | 1.39521  | 0.376986 |
| 87.6     | 1 | 1.282344 | 0.270489 |
| 101.6333 | 1 | 0.967858 | 0.90965  |
| 95.86667 | 1 | 1.085883 | 0.257562 |
| 90.36667 | 1 | 1.213205 | 0.396577 |
| 98.86667 | 1 | 1.022927 | 0.902924 |
| 106.7667 | 1 | 0.873244 | 0.706323 |
| 112.4667 | 1 | 0.778305 | 0.574225 |
| 91.86667 | 1 | 1.177431 | 0.33747  |
| 112.3667 | 1 | 0.779887 | 0.438224 |
| 97.26667 | 1 | 1.056203 | 0.6217   |
| 86.26667 | 1 | 1.318393 | 0.226625 |
| 91.03333 | 1 | 1.197364 | 0.393605 |
| 97.8     | 1 | 1.04499  | 0.403794 |
| 95.93333 | 1 | 1.084434 | 0.404291 |
| 100.8333 | 1 | 0.983471 | 0.734446 |
| 95.9     | 1 | 1.085853 | 0.17301  |
| 88.13333 | 1 | 1.269667 | 0.248217 |
| 100.8667 | 1 | 0.983146 | 0.930705 |
| 106.5    | 1 | 0.877934 | 0.303607 |
| 98.13333 | 1 | 1.037704 | 0.923711 |
| 96.23333 | 1 | 1.078282 | 0.64294  |
| 101.9667 | 1 | 0.961425 | 0.711562 |
| 139.9    | 1 | 0.429354 | 0.312858 |
| 93.26667 | 1 | 1.144389 | 0.103413 |
| 102.5667 | 1 | 0.949626 | 0.795152 |

|          |   |          |          |
|----------|---|----------|----------|
| 93.13333 | 1 | 1.147459 | 0.325161 |
| 79.23333 | 1 | 1.524611 | 0.124786 |
| 96.36667 | 1 | 1.074715 | 0.686613 |
| 81.6     | 1 | 1.45098  | 0.453032 |
| 97.66667 | 1 | 1.048123 | 0.597366 |
| 80.16667 | 1 | 1.494802 | 0.343063 |
| 96.53333 | 1 | 1.071478 | 0.720292 |
| 109.1333 | 1 | 0.832926 | 0.433269 |
| 108.3    | 1 | 0.846722 | 0.127703 |
| 95.73333 | 1 | 1.089136 | 0.605837 |
| 100.4333 | 1 | 0.991039 | 0.924312 |
| 117.0333 | 1 | 0.7092   | 0.130358 |
| 96.3     | 1 | 1.077189 | 0.594247 |
| 105.2333 | 1 | 0.900855 | 0.486122 |
| 109.7333 | 1 | 0.8226   | 0.273227 |
| 98.96667 | 1 | 1.020882 | 0.385052 |
| 96.13333 | 1 | 1.080791 | 0.669301 |
| 98.33333 | 1 | 1.033559 | 0.519983 |
| 87.86667 | 1 | 1.275797 | 0.403338 |
| 96.03333 | 1 | 1.082957 | 0.451916 |
| 94.5     | 1 | 1.116402 | 0.126943 |
| NA       | 0 | NA       | NA       |
| 104.6    | 1 | 0.912046 | 0.733498 |
| 96.2     | 1 | 1.079002 | 0.390057 |
| 89.8     | 1 | 1.227543 | 0.040367 |
| 112.7667 | 1 | 0.773574 | 0.061741 |
| 84       | 1 | 1.380556 | 0.320171 |
| 107.3333 | 1 | 0.863354 | 0.610316 |
| 91.26667 | 1 | 1.191381 | 0.543907 |
| 97.4     | 1 | 1.05373  | 0.74871  |
| 92.96667 | 1 | 1.151309 | 0.41978  |
| 107.2    | 1 | 0.865672 | 0.430025 |
| 104.4667 | 1 | 0.914167 | 0.396741 |
| 83.66667 | 1 | 1.390438 | 0.284739 |
| 96.93333 | 1 | 1.06293  | 0.451576 |
| 101.9    | 1 | 0.963036 | 0.869495 |
| 89.6     | 1 | 1.232887 | 0.364544 |
| NA       | 0 | NA       | NA       |
| 91.5     | 1 | 1.185792 | 0.371836 |
| 95.1     | 1 | 1.103049 | 0.473104 |
| 96.4     | 1 | 1.074689 | 0.413794 |
| 91.4     | 1 | 1.188184 | 0.431813 |
| 88.16667 | 1 | 1.268053 | 0.387857 |
| 102.3    | 1 | 0.95536  | 0.83507  |
| 115.9667 | 1 | 0.724921 | 0.31573  |
| 94.83333 | 1 | 1.108612 | 0.487076 |
| 91.33333 | 1 | 1.190146 | 0.486651 |
| 89.66667 | 1 | 1.230112 | 0.264351 |
| 105.3    | 1 | 0.899652 | 0.715146 |
| 99.66667 | 1 | 1.006355 | 0.981746 |
| 112.7333 | 1 | 0.774098 | 0.309169 |

|          |   |          |          |
|----------|---|----------|----------|
| 100.7    | 1 | 0.986097 | 0.972892 |
| 103.5    | 1 | 0.932045 | 0.735693 |
| 89.13333 | 1 | 1.243829 | 0.273436 |
| 103.0333 | 1 | 0.941119 | 0.720726 |
| 85.6     | 1 | 1.336838 | 0.134161 |
| 62.46667 | 1 | 2.201708 | 0.226184 |
| 106.3667 | 1 | 0.880915 | 0.324229 |
| 95.36667 | 1 | 1.097518 | 0.493437 |
| 97.5     | 1 | 1.051282 | 0.393489 |
| 89.73333 | 1 | 1.228826 | 0.193304 |
| 88.83333 | 1 | 1.251782 | 0.235135 |
| 97.4     | 1 | 1.053388 | 0.805727 |
| 100.9333 | 1 | 0.981506 | 0.821563 |
| 96.4     | 1 | 1.075035 | 0.69052  |
| 106.2667 | 1 | 0.881744 | 0.291156 |
| 100.5    | 1 | 0.99005  | 0.923386 |
| 108.8    | 1 | 0.838235 | 0.727107 |
| 90.66667 | 1 | 1.205882 | 0.186964 |
| NA       | 0 | NA       | NA       |
| NA       | 0 | NA       | NA       |
| 101.4333 | 1 | 0.972067 | 0.880375 |
| 94.86667 | 1 | 1.107871 | 0.465483 |
| NA       | 0 | NA       | NA       |
| 90.63333 | 1 | 1.207061 | 0.052176 |
| 102.4667 | 1 | 0.951529 | 0.488503 |
| 92.7     | 1 | 1.157857 | 0.068892 |
| 104.3667 | 1 | 0.916001 | 0.248044 |
| 83.43333 | 1 | 1.397123 | 0.608718 |
| 102.2667 | 1 | 0.955346 | 0.718582 |
| 110.6    | 1 | 0.808017 | 0.347843 |
| 91.5     | 1 | 1.185792 | 0.397895 |
| 84.46667 | 1 | 1.367403 | 0.366844 |
| 84.76667 | 1 | 1.359811 | 0.145285 |
| 96.6     | 1 | 1.071084 | 0.637793 |
| 93.23333 | 1 | 1.145156 | 0.236799 |
| 92.2     | 1 | 1.169559 | 0.123101 |
| NA       | 0 | NA       | NA       |
| 96.2     | 1 | 1.078656 | 0.323181 |
| 106.7333 | 1 | 0.874141 | 0.173791 |
| 94.73333 | 1 | 1.111189 | 0.588832 |
| 97.3     | 1 | 1.055156 | 0.789128 |
| 91.43333 | 1 | 1.187386 | 0.051485 |
| 100.1    | 1 | 0.997669 | 0.97966  |
| 90.36667 | 1 | 1.213205 | 0.141866 |
| 99.13333 | 1 | 1.017821 | 0.868353 |
| 95.03333 | 1 | 1.104174 | 0.581344 |
| 88.96667 | 1 | 1.247658 | 0.370085 |
| 87.7     | 1 | 1.280122 | 0.176685 |
| 99.93333 | 1 | 1.001334 | 0.986602 |
| 108.9333 | 1 | 0.835985 | 0.614246 |
| 92.13333 | 1 | 1.170767 | 0.489527 |

|          |   |          |          |
|----------|---|----------|----------|
| 99.6     | 1 | 1.008032 | 0.977478 |
| 88.76667 | 1 | 1.253098 | 0.321993 |
| 108.2333 | 1 | 0.848168 | 0.289228 |
| 90.1     | 1 | 1.220126 | 0.279336 |
| 99       | 1 | 1.020202 | 0.868012 |
| NA       | 0 | NA       | NA       |
| 92.93333 | 1 | 1.15208  | 0.454209 |
| 100.4667 | 1 | 0.99071  | 0.970918 |
| 94.56667 | 1 | 1.11491  | 0.477947 |
| NA       | 0 | NA       | NA       |
| 99.56667 | 1 | 1.008704 | 0.931639 |
| 83.56667 | 1 | 1.393299 | 0.333004 |
| 98.3     | 1 | 1.034588 | 0.873327 |
| 105.0333 | 1 | 0.904475 | 0.099499 |
| 94.76667 | 1 | 1.110447 | 0.067517 |
| 104.3667 | 1 | 0.916321 | 0.490849 |
| 109.1333 | 1 | 0.832621 | 0.201321 |
| 93.16667 | 1 | 1.146691 | 0.407131 |
| 103.4333 | 1 | 0.933613 | 0.496772 |
| 115.7    | 1 | 0.728608 | 0.329737 |
| 97.16667 | 1 | 1.057976 | 0.803371 |
| 102.1667 | 1 | 0.957586 | 0.680842 |
| 103.9    | 1 | 0.924928 | 0.456145 |
| NA       | 0 | NA       | NA       |
| 89.76667 | 1 | 1.227999 | 0.145515 |
| 100.1667 | 1 | 0.996672 | 0.979471 |
| 98.5     | 1 | 1.030795 | 0.87885  |
| 88.6     | 1 | 1.257336 | 0.529363 |
| 86.8     | 1 | 1.304531 | 0.313011 |
| 96       | 1 | 1.082986 | 0.702018 |
| 87.03333 | 1 | 1.29797  | 0.182123 |
| 103.4    | 1 | 0.934236 | 0.776677 |
| 85.53333 | 1 | 1.33827  | 0.195132 |
| 104.1    | 1 | 0.92123  | 0.748903 |
| 115.4    | 1 | 0.733102 | 0.292776 |
| 106.3    | 1 | 0.881468 | 0.575686 |
| 96.16667 | 1 | 1.079723 | 0.636511 |
| 99.03333 | 1 | 1.019859 | 0.896522 |
| 90.3     | 1 | 1.21447  | 0.229498 |
| NA       | 0 | NA       | NA       |
| 107.2667 | 1 | 0.864201 | 0.49737  |
| 101.6333 | 1 | 0.967858 | 0.777541 |
| 88.73333 | 1 | 1.253944 | 0.375766 |
| 81.43333 | 1 | 1.455997 | 0.333747 |
| 112.4333 | 1 | 0.779128 | 0.207496 |
| 84.46667 | 1 | 1.367798 | 0.326933 |
| 95.16667 | 1 | 1.101226 | 0.701305 |
| 89.53333 | 1 | 1.233805 | 0.016367 |
| NA       | 0 | NA       | NA       |
| 93.4     | 1 | 1.141328 | 0.014149 |
| 110.4667 | 1 | 0.811104 | 0.178977 |

|          |      |                   |
|----------|------|-------------------|
| NA       | 0 NA | NA                |
| 90.46667 | 1    | 1.210759 0.209139 |
| 99.13333 | 1    | 1.017485 0.944958 |
| 97.56667 | 1    | 1.04988 0.864627  |
| 91.76667 | 1    | 1.179441 0.323242 |
| 97.5     | 1    | 1.051282 0.411837 |
| 106.0667 | 1    | 0.885921 0.556106 |
| 95.3     | 1    | 1.098986 0.63115  |
| 92.33333 | 1    | 1.166426 0.378093 |
| 97.1     | 1    | 1.059732 0.647294 |
| 80.93333 | 1    | 1.47117 0.227445  |
| 96.13333 | 1    | 1.080791 0.717753 |
| 89.76667 | 1    | 1.227999 0.287153 |
| 80.5     | 1    | 1.484058 0.047249 |
| 102.2    | 1    | 0.956947 0.874288 |
| 99.43333 | 1    | 1.011398 0.921901 |
| 99.03333 | 1    | 1.019859 0.707345 |
| 111.1333 | 1    | 0.79964 0.224738  |
| 100.3333 | 1    | 0.993355 0.982464 |
| 103.5    | 1    | 0.932367 0.423193 |
| 95.3     | 1    | 1.098986 0.507913 |
| 101.0667 | 1    | 0.979222 0.941963 |
| 106.2    | 1    | 0.882925 0.387218 |
| 89.73333 | 1    | 1.228455 0.014922 |
| 94.76667 | 1    | 1.110447 0.352499 |
| 97.83333 | 1    | 1.043952 0.889698 |
| 99.16667 | 1    | 1.017143 0.84603  |
| 83.3     | 1    | 1.40096 0.426997  |
| 105.6667 | 1    | 0.892429 0.361073 |
| 100.8667 | 1    | 0.982816 0.871863 |
| 132.9667 | 1    | 0.504136 0.017381 |
| 88.23333 | 1    | 1.266717 0.357096 |
| 105.7333 | 1    | 0.891551 0.615058 |
| 99.3     | 1    | 1.014434 0.865686 |
| 91.86667 | 1    | 1.177068 0.29568  |
| 95.93333 | 1    | 1.084781 0.362398 |
| 85.1     | 1    | 1.349785 0.059347 |
| 93       | 1    | 1.150538 0.127082 |
| 93.46667 | 1    | 1.1398 0.120307   |
| NA       | 0 NA | NA                |
| 89.4     | 1    | 1.237136 0.101096 |
| 104.4    | 1    | 0.915709 0.373068 |
| 93.83333 | 1    | 1.131083 0.732308 |
| 116.1    | 1    | 0.722366 0.013528 |
| 91.53333 | 1    | 1.184996 0.456169 |
| 95.56667 | 1    | 1.09278 0.470924  |
| 94.13333 | 1    | 1.124646 0.257738 |
| 94.76667 | 1    | 1.110095 0.188745 |
| 99.76667 | 1    | 1.004678 0.957986 |
| 97.06667 | 1    | 1.06044 0.879093  |
| 124.4333 | 1    | 0.607554 0.080424 |

|          |   |          |          |
|----------|---|----------|----------|
| 95.43333 | 1 | 1.095704 | 0.47568  |
| 95.5     | 1 | 1.094241 | 0.369122 |
| 105.1333 | 1 | 0.902029 | 0.510571 |
| 96.7     | 1 | 1.068252 | 0.305247 |
| 101.7333 | 1 | 0.965924 | 0.767027 |
| 91.43333 | 1 | 1.187386 | 0.314984 |
| 93.03333 | 1 | 1.150125 | 0.179633 |
| 93.8     | 1 | 1.132196 | 0.442814 |
| 108.2    | 1 | 0.848429 | 0.256811 |
| 89.6     | 1 | 1.231771 | 0.399048 |
| 95.2     | 1 | 1.10049  | 0.757831 |
| 101.9333 | 1 | 0.96174  | 0.782635 |
| 91.3     | 1 | 1.190581 | 0.614914 |
| 105.4667 | 1 | 0.896334 | 0.509172 |
| 99.3     | 1 | 1.014099 | 0.934314 |
| 90.5     | 1 | 1.210313 | 0.421545 |
| 89.96667 | 1 | 1.223046 | 0.541144 |
| 102.2333 | 1 | 0.956309 | 0.68094  |
| 104.8667 | 1 | 0.907184 | 0.725514 |
| 83.36667 | 1 | 1.398641 | 0.360018 |
| 93.46667 | 1 | 1.1398   | 0.244167 |
| 95.4     | 1 | 1.096087 | 0.626484 |
| 101.5    | 1 | 0.970772 | 0.716153 |
| NA       | 0 | NA       | NA       |
| 84.36667 | 1 | 1.371    | 0.303722 |
| 59.3     | 1 | 2.372681 | 0.113339 |
| 101.5333 | 1 | 0.969468 | 0.77821  |
| 98       | 1 | 1.040816 | 0.865243 |
| 102.1    | 1 | 0.958864 | 0.693104 |
| 94.26667 | 1 | 1.121641 | 0.733018 |
| 96.26667 | 1 | 1.077562 | 0.704304 |
| 77.13333 | 1 | 1.592913 | 0.167062 |
| 104.4    | 1 | 0.916028 | 0.446728 |
| 99.66667 | 1 | 1.007023 | 0.938815 |
| 99.16667 | 1 | 1.016807 | 0.894231 |
| 115      | 1 | 0.738841 | 0.045907 |
| 104.7667 | 1 | 0.908686 | 0.585124 |
| 92.16667 | 1 | 1.170344 | 0.476649 |
| 98.6     | 1 | 1.028059 | 0.71102  |
| 112.3    | 1 | 0.781241 | 0.086164 |
| 94.4     | 1 | 1.118644 | 0.511147 |
| 88.93333 | 1 | 1.24925  | 0.616604 |
| 96.7     | 1 | 1.068252 | 0.246373 |
| 107.7333 | 1 | 0.857054 | 0.590831 |
| 94.9     | 1 | 1.10713  | 0.405601 |
| NA       | 0 | NA       | NA       |
| 93.23333 | 1 | 1.145156 | 0.755553 |
| 91.1     | 1 | 1.195756 | 0.296016 |
| 96.23333 | 1 | 1.077936 | 0.293269 |
| 99.5     | 1 | 1.01005  | 0.952412 |
| 98.16667 | 1 | 1.037691 | 0.574272 |



|          |   |          |          |
|----------|---|----------|----------|
| 86.5     | 1 | 1.311753 | 0.361291 |
| 94.56667 | 1 | 1.11491  | 0.445301 |
| 106.6333 | 1 | 0.875899 | 0.521082 |
| 100.5333 | 1 | 0.98939  | 0.931073 |
| 97.56667 | 1 | 1.04988  | 0.711643 |
| 105.5667 | 1 | 0.894222 | 0.273789 |
| 84.06667 | 1 | 1.379064 | 0.592134 |
| 95.66667 | 1 | 1.090592 | 0.42384  |
| NA       | 0 | NA       | NA       |
| 91.23333 | 1 | 1.192547 | 0.370599 |
| 114.2333 | 1 | 0.750802 | 0.57595  |
| 99.56667 | 1 | 1.009039 | 0.916052 |
| 98.5     | 1 | 1.030795 | 0.685542 |
| 86.5     | 1 | 1.312139 | 0.216327 |
| 92.4     | 1 | 1.164502 | 0.137435 |
| 110.3333 | 1 | 0.812991 | 0.255273 |
| NA       | 0 | NA       | NA       |
| 97.23333 | 1 | 1.057251 | 0.717159 |
| 99.33333 | 1 | 1.013423 | 0.894503 |
| 95.63333 | 1 | 1.091321 | 0.542625 |
| 88.76667 | 1 | 1.253474 | 0.363087 |
| 96.23333 | 1 | 1.078282 | 0.251574 |
| 97.36667 | 1 | 1.054433 | 0.575819 |
| 86.6     | 1 | 1.309854 | 0.196994 |
| 98.13333 | 1 | 1.038043 | 0.783127 |
| 84.5     | 1 | 1.366864 | 0.332732 |
| 98.16667 | 1 | 1.037351 | 0.621678 |
| 80       | 1 | 1.5      | 0.059344 |
| 87.46667 | 1 | 1.286204 | 0.272432 |
| 104.7    | 1 | 0.909901 | 0.39993  |
| 97.73333 | 1 | 1.046044 | 0.614991 |
| 93.76667 | 1 | 1.13331  | 0.327118 |
| 104.7333 | 1 | 0.909612 | 0.70422  |
| 94.7     | 1 | 1.111932 | 0.164542 |
| 98.5     | 1 | 1.030457 | 0.810897 |
| 100.6333 | 1 | 0.987744 | 0.949516 |
| 86.46667 | 1 | 1.31303  | 0.515799 |
| 96.86667 | 1 | 1.064694 | 0.338127 |
| 81.1     | 1 | 1.466502 | 0.094599 |
| 88.73333 | 1 | 1.253944 | 0.287989 |
| 115.5333 | 1 | 0.731102 | 0.307204 |
| 103.2333 | 1 | 0.937682 | 0.691163 |
| 88.1     | 1 | 1.270526 | 0.246975 |
| 102.1667 | 1 | 0.957912 | 0.559077 |
| 97.53333 | 1 | 1.050239 | 0.515399 |
| 79.16667 | 1 | 1.525895 | 0.075162 |
| 96.3     | 1 | 1.076843 | 0.245347 |
| 99.56667 | 1 | 1.008704 | 0.971667 |
| 113.3333 | 1 | 0.764706 | 0.623908 |
| 98       | 1 | 1.040816 | 0.770027 |
| 102      | 1 | 0.961111 | 0.788107 |

|          |   |          |          |
|----------|---|----------|----------|
| 108.3333 | 1 | 0.846154 | 0.585807 |
| 115.6667 | 1 | 0.729107 | 0.0437   |
| 105.2    | 1 | 0.900824 | 0.029511 |
| 111.7    | 1 | 0.79051  | 0.134088 |
| 95.03333 | 1 | 1.104525 | 0.35795  |
| 100.5    | 1 | 0.990381 | 0.962918 |
| 101.8    | 1 | 0.964637 | 0.723786 |
| 95.43333 | 1 | 1.095704 | 0.394603 |
| 101.2    | 1 | 0.976285 | 0.914364 |
| 108.7667 | 1 | 0.838799 | 0.760963 |
| 86.9     | 1 | 1.301496 | 0.416325 |
| NA       | 0 | NA       | NA       |
| 90.43333 | 1 | 1.211942 | 0.588801 |
| 125.7667 | 1 | 0.590246 | 0.021775 |
| 92       | 1 | 1.173551 | 0.423756 |
| 97.66667 | 1 | 1.047782 | 0.749731 |
| 89.2     | 1 | 1.242152 | 0.124329 |
| 83.73333 | 1 | 1.388535 | 0.198386 |
| 89.76667 | 1 | 1.227627 | 0.49823  |
| 108.9    | 1 | 0.836547 | 0.059739 |
| 94.4     | 1 | 1.118644 | 0.505442 |
| 116.2333 | 1 | 0.72039  | 0.392021 |
| 102.8667 | 1 | 0.944264 | 0.592861 |
| 94.96667 | 1 | 1.106353 | 0.709182 |
| 92.63333 | 1 | 1.15941  | 0.655424 |
| 97.13333 | 1 | 1.059025 | 0.605097 |
| 98.73333 | 1 | 1.025321 | 0.914867 |
| 115.5667 | 1 | 0.730603 | 0.677348 |
| 103.5    | 1 | 0.932367 | 0.636499 |
| 99.5     | 1 | 1.009715 | 0.935308 |
| 95.83333 | 1 | 1.086957 | 0.530868 |
| 87.5     | 1 | 1.286095 | 0.489562 |
| 92       | 1 | 1.173913 | 0.432957 |
| 104.8333 | 1 | 0.908108 | 0.796274 |
| 100.6    | 1 | 0.98774  | 0.869549 |
| 99.3     | 1 | 1.014434 | 0.916415 |
| 86.6     | 1 | 1.309469 | 0.20938  |
| 88.66667 | 1 | 1.255639 | 0.532081 |
| 91.9     | 1 | 1.176641 | 0.508043 |
| 89.33333 | 1 | 1.238806 | 0.216873 |
| 99.16667 | 1 | 1.016471 | 0.906767 |
| 99.83333 | 1 | 1.003339 | 0.97712  |
| 98.46667 | 1 | 1.030806 | 0.766098 |
| 98.16667 | 1 | 1.037351 | 0.859431 |
| 99.83333 | 1 | 1.003005 | 0.965984 |
| 92.83333 | 1 | 1.154399 | 0.560834 |
| 114.3333 | 1 | 0.749271 | 0.26298  |
| 92.33333 | 1 | 1.166426 | 0.211786 |
| 100.2667 | 1 | 0.994348 | 0.925993 |
| 102.1    | 1 | 0.958864 | 0.648702 |
| 85.5     | 1 | 1.339571 | 0.011314 |

|          |   |          |          |
|----------|---|----------|----------|
| 99.1     | 1 | 1.017827 | 0.803026 |
| 96.76667 | 1 | 1.066827 | 0.199928 |
| NA       | 0 | NA       | NA       |
| 89.6     | 1 | 1.232515 | 0.29411  |
| 98.83333 | 1 | 1.023609 | 0.923062 |
| 98.9     | 1 | 1.022582 | 0.895739 |
| 105.4    | 1 | 0.897849 | 0.352636 |
| 103.5333 | 1 | 0.932067 | 0.561315 |
| 96.3     | 1 | 1.076843 | 0.695256 |
| 76.63333 | 1 | 1.60983  | 0.375477 |
| 95       | 1 | 1.105263 | 0.548753 |
| 81.6     | 1 | 1.45098  | 0.289978 |
| 99.53333 | 1 | 1.009377 | 0.981572 |
| 98.23333 | 1 | 1.036308 | 0.76952  |
| 113.2    | 1 | 0.766784 | 0.131481 |
| 105.5667 | 1 | 0.894853 | 0.24922  |
| 113.6667 | 1 | 0.759824 | 0.033957 |
| 84       | 1 | 1.380556 | 0.279603 |
| NA       | 0 | NA       | NA       |
| 86.06667 | 1 | 1.323393 | 0.325811 |
| 100.9667 | 1 | 0.980852 | 0.896676 |
| 99.83333 | 1 | 1.003005 | 0.990695 |
| 84.66667 | 1 | 1.362598 | 0.069975 |
| 91.03333 | 1 | 1.196997 | 0.431746 |
| 97.9     | 1 | 1.042901 | 0.918853 |
| 95.63333 | 1 | 1.090972 | 0.160955 |
| 92.1     | 1 | 1.171191 | 0.447753 |
| 107.8    | 1 | 0.855288 | 0.13134  |
| 100.4333 | 1 | 0.991371 | 0.91001  |
| 94.63333 | 1 | 1.11342  | 0.297286 |
| 95.7     | 1 | 1.089516 | 0.836214 |
| 96.8     | 1 | 1.066116 | 0.516122 |
| 92.3     | 1 | 1.166847 | 0.408418 |
| 99.26667 | 1 | 1.014775 | 0.866726 |
| 95.5     | 1 | 1.094241 | 0.653503 |
| NA       | 0 | NA       | NA       |
| NA       | 0 | NA       | NA       |
| NA       | 0 | NA       | NA       |
| 92.8     | 1 | 1.155172 | 0.149511 |
| 100.2    | 1 | 0.996008 | 0.957927 |
| 110.0667 | 1 | 0.817081 | 0.295806 |
| 98.66667 | 1 | 1.027027 | 0.863494 |
| 92.06667 | 1 | 1.172701 | 0.434026 |
| 87.06667 | 1 | 1.297473 | 0.422514 |
| 103.5    | 1 | 0.932367 | 0.440888 |
| 98.36667 | 1 | 1.033209 | 0.807607 |
| 102.7    | 1 | 0.94742  | 0.667857 |
| 84.5     | 1 | 1.366864 | 0.260327 |
| 82.9     | 1 | 1.412947 | 0.263126 |
| 92.26667 | 1 | 1.167991 | 0.623135 |
| 87.4     | 1 | 1.287948 | 0.313131 |

|          |   |          |          |
|----------|---|----------|----------|
| 98.46667 | 1 | 1.031483 | 0.922992 |
| 101.8333 | 1 | 0.963993 | 0.671338 |
| 94.83333 | 1 | 1.108963 | 0.595216 |
| 91.4     | 1 | 1.188184 | 0.170392 |
| 83.93333 | 1 | 1.382844 | 0.192286 |
| 91.53333 | 1 | 1.184632 | 0.525392 |
| 99.63333 | 1 | 1.00736  | 0.917702 |
| 99.16667 | 1 | 1.016807 | 0.882871 |
| 96.4     | 1 | 1.074689 | 0.448775 |
| 102.8    | 1 | 0.945525 | 0.646769 |
| 92.43333 | 1 | 1.163722 | 0.503173 |
| 109.6667 | 1 | 0.823708 | 0.057347 |
| 84.03333 | 1 | 1.380008 | 0.029533 |
| 107.2    | 1 | 0.865672 | 0.014761 |
| 73.33333 | 1 | 1.727727 | 0.067041 |
| 94.06667 | 1 | 1.126506 | 0.478346 |
| 93.3     | 1 | 1.143623 | 0.606655 |
| 88.96667 | 1 | 1.247658 | 0.300944 |
| 102.2667 | 1 | 0.955671 | 0.665435 |
| 80.33333 | 1 | 1.490041 | 0.000175 |
| 100.9667 | 1 | 0.980852 | 0.853378 |
| 95.06667 | 1 | 1.103787 | 0.494905 |
| 99.2     | 1 | 1.016465 | 0.747423 |
| 102      | 1 | 0.960784 | 0.247542 |
| 101.7333 | 1 | 0.966252 | 0.879549 |
| NA       | 0 | NA       | NA       |
| 102.6    | 1 | 0.949643 | 0.814626 |
| 105.3333 | 1 | 0.898734 | 0.529289 |
| 97.06667 | 1 | 1.06044  | 0.760988 |
| 97.56667 | 1 | 1.04988  | 0.882528 |
| 101.4333 | 1 | 0.972067 | 0.821375 |
| 106.2333 | 1 | 0.882648 | 0.188914 |
| 108.0333 | 1 | 0.85128  | 0.158277 |
| 101.6667 | 1 | 0.966885 | 0.802538 |
| 99.63333 | 1 | 1.00736  | 0.935957 |
| 113.0667 | 1 | 0.768868 | 0.418012 |
| 102.3    | 1 | 0.955034 | 0.676532 |
| 97.83333 | 1 | 1.044293 | 0.796683 |
| NA       | 0 | NA       | NA       |
| 89.23333 | 1 | 1.240941 | 0.068574 |
| 91.5     | 1 | 1.186157 | 0.061833 |
| 95.26667 | 1 | 1.09937  | 0.375066 |
| 106.1333 | 1 | 0.884736 | 0.610589 |
| 99.96667 | 1 | 1.000333 | 0.997393 |
| 93.16667 | 1 | 1.146691 | 0.400536 |
| 90.1     | 1 | 1.219016 | 0.1006   |
| 102.4    | 1 | 0.953451 | 0.814349 |
| 105.0333 | 1 | 0.904157 | 0.395257 |
| 95.6     | 1 | 1.09205  | 0.073364 |
| 101.7667 | 1 | 0.965935 | 0.757695 |
| 105.4    | 1 | 0.897849 | 0.267259 |

|          |   |          |          |
|----------|---|----------|----------|
| 93.53333 | 1 | 1.138275 | 0.191139 |
| 80.43333 | 1 | 1.486117 | 0.076782 |
| 86.53333 | 1 | 1.311248 | 0.114504 |
| 111.2    | 1 | 0.798561 | 0.094212 |
| 101.8333 | 1 | 0.963993 | 0.742726 |
| 102.0667 | 1 | 0.959504 | 0.842535 |
| 94.4     | 1 | 1.118644 | 0.313604 |
| 88.76667 | 1 | 1.253474 | 0.103681 |
| 104.2    | 1 | 0.919066 | 0.600256 |
| 99.7     | 1 | 1.005684 | 0.902383 |
| 94.23333 | 1 | 1.122745 | 0.233092 |
| 110.2    | 1 | 0.81458  | 0.238746 |
| 93.2     | 1 | 1.14628  | 0.194417 |
| 107.1    | 1 | 0.867102 | 0.283005 |
| 101.1333 | 1 | 0.977258 | 0.876162 |
| 84.33333 | 1 | 1.371542 | 0.07119  |
| 99.3     | 1 | 1.014434 | 0.85411  |
| NA       | 0 | NA       | NA       |
| 92.76667 | 1 | 1.155947 | 0.540398 |
| 90.66667 | 1 | 1.205882 | 0.296352 |
| 93.06667 | 1 | 1.149355 | 0.181492 |
| 90.56667 | 1 | 1.208686 | 0.006095 |
| 102.5333 | 1 | 0.95026  | 0.58954  |
| 94.33333 | 1 | 1.120141 | 0.743685 |
| 92.93333 | 1 | 1.15208  | 0.214621 |
| 94.9     | 1 | 1.108184 | 0.358783 |
| 107.0667 | 1 | 0.867995 | 0.29465  |
| 102.0667 | 1 | 0.959504 | 0.865055 |
| 93.23333 | 1 | 1.145156 | 0.02358  |
| 96.56667 | 1 | 1.071108 | 0.492841 |
| 129.0333 | 1 | 0.549987 | 0.098231 |
| 94.13333 | 1 | 1.124646 | 0.47674  |
| NA       | 0 | NA       | NA       |
| 92.46667 | 1 | 1.162942 | 0.465457 |
| 88.3     | 1 | 1.265006 | 0.249335 |
| 87.1     | 1 | 1.296594 | 0.264661 |
| 130.7333 | 1 | 0.529832 | 0.018816 |
| 107.1    | 1 | 0.867414 | 0.230021 |
| 101.8667 | 1 | 0.963024 | 0.886358 |
| 100.1333 | 1 | 0.99767  | 0.973382 |
| 110.2    | 1 | 0.81458  | 0.030965 |
| 105.4667 | 1 | 0.89665  | 0.631464 |
| 96.93333 | 1 | 1.063274 | 0.565019 |
| 86.36667 | 1 | 1.315322 | 0.39859  |
| 92.26667 | 1 | 1.167991 | 0.325791 |
| 98.8     | 1 | 1.024629 | 0.918051 |
| 99.43333 | 1 | 1.011398 | 0.897009 |
| 88.5     | 1 | 1.25951  | 0.472639 |
| 101.1333 | 1 | 0.977587 | 0.778659 |
| 99.26667 | 1 | 1.014775 | 0.911002 |
| 99.63333 | 1 | 1.00736  | 0.980851 |

|          |   |          |          |
|----------|---|----------|----------|
| 102.6333 | 1 | 0.948685 | 0.712501 |
| NA       | 0 | NA       | NA       |
| 106.4333 | 1 | 0.879111 | 0.196164 |
| 103.1333 | 1 | 0.939237 | 0.32489  |
| 109.4333 | 1 | 0.827597 | 0.229275 |
| 86.6     | 1 | 1.309469 | 0.325913 |
| 97.8     | 1 | 1.045331 | 0.627661 |
| 98       | 1 | 1.040816 | 0.657437 |
| 107      | 1 | 0.86947  | 0.385303 |
| 113.2333 | 1 | 0.766264 | 0.255974 |
| NA       | 0 | NA       | NA       |
| 97.16667 | 1 | 1.058319 | 0.726538 |
| 103      | 1 | 0.941748 | 0.835154 |
| 105.9333 | 1 | 0.88798  | 0.379336 |
| 97.73333 | 1 | 1.046385 | 0.581757 |
| 108.1    | 1 | 0.849522 | 0.7352   |
| NA       | 0 | NA       | NA       |
| 104.0667 | 1 | 0.921845 | 0.604972 |
| 109.5    | 1 | 0.826484 | 0.313965 |
| 89.13333 | 1 | 1.243829 | 0.023189 |
| 102.9333 | 1 | 0.943005 | 0.764287 |
| 91.1     | 1 | 1.19539  | 0.2818   |
| 87.53333 | 1 | 1.284844 | 0.364555 |
| 101.7667 | 1 | 0.964953 | 0.794808 |
| 102.3333 | 1 | 0.954397 | 0.731175 |
| 103.4667 | 1 | 0.93299  | 0.509174 |
| 99.16667 | 1 | 1.016471 | 0.868591 |
| 95.83333 | 1 | 1.087304 | 0.627657 |
| 104.8333 | 1 | 0.907472 | 0.827915 |
| 83.8     | 1 | 1.387033 | 0.004776 |
| 90.46667 | 1 | 1.211127 | 0.418671 |
| 90.76667 | 1 | 1.203452 | 0.303803 |
| 106.1333 | 1 | 0.884108 | 0.393845 |
| NA       | 0 | NA       | NA       |
| NA       | 0 | NA       | NA       |
| 102.8    | 1 | 0.945525 | 0.700688 |
| 102.7667 | 1 | 0.945832 | 0.803271 |
| 90.36667 | 1 | 1.213205 | 0.216689 |
| 97.6     | 1 | 1.04918  | 0.850327 |
| 75.03333 | 1 | 1.665038 | 0.117275 |
| 88.53333 | 1 | 1.259413 | 0.459956 |
| 91.66667 | 1 | 1.181818 | 0.691425 |
| 88.23333 | 1 | 1.267095 | 0.028955 |
| 90.26667 | 1 | 1.216027 | 0.194408 |
| 102.9333 | 1 | 0.943005 | 0.814037 |
| 100.7667 | 1 | 0.984783 | 0.890565 |
| 88.33333 | 1 | 1.264528 | 0.336157 |
| 94.03333 | 1 | 1.12726  | 0.411367 |
| 125.9    | 1 | 0.588562 | 0.305854 |
| 105.7667 | 1 | 0.890955 | 0.345066 |
| 56.83333 | 1 | 2.519062 | 0.372789 |

|          |   |          |          |
|----------|---|----------|----------|
| 93.66667 | 1 | 1.135231 | 0.039275 |
| 99.56667 | 1 | 1.008704 | 0.927971 |
| NA       | 0 | NA       | NA       |
| 85.93333 | 1 | 1.328161 | 0.155696 |
| 75.83333 | 1 | 1.637802 | 0.173    |
| 100.1    | 1 | 0.998002 | 0.983752 |
| 85.8     | 1 | 1.331002 | 0.38107  |
| 102.2333 | 1 | 0.956309 | 0.387021 |
| 85.5     | 1 | 1.339181 | 0.593001 |
| 100.8667 | 1 | 0.982816 | 0.876912 |
| 97.1     | 1 | 1.059389 | 0.703352 |
| 124.2    | 1 | 0.610574 | 0.058658 |
| NA       | 0 | NA       | NA       |
| 94.33333 | 1 | 1.120495 | 0.41488  |
| 99.5     | 1 | 1.01005  | 0.958313 |
| 90.03333 | 1 | 1.22177  | 0.152301 |
| 91.8     | 1 | 1.178649 | 0.141309 |
| 106.4333 | 1 | 0.879111 | 0.298513 |
| 99.83333 | 1 | 1.003339 | 0.989068 |
| 98.06667 | 1 | 1.039429 | 0.664356 |
| 98.03333 | 1 | 1.040122 | 0.808292 |
| 100.4333 | 1 | 0.991371 | 0.955809 |
| 95.16667 | 1 | 1.100876 | 0.027599 |
| 93.6     | 1 | 1.136752 | 0.44742  |
| 106.1667 | 1 | 0.883516 | 0.208867 |
| 101.7667 | 1 | 0.965608 | 0.739162 |
| NA       | 0 | NA       | NA       |
| 92.2     | 1 | 1.169197 | 0.244772 |
| 97.5     | 1 | 1.051282 | 0.73958  |
| 116.3333 | 1 | 0.719198 | 0.515237 |
| 122      | 1 | 0.639344 | 0.137488 |
| NA       | 0 | NA       | NA       |
| 110.8333 | 1 | 0.804211 | 0.756339 |
| 89.2     | 1 | 1.241779 | 0.387797 |
| NA       | 0 | NA       | NA       |
| 95.73333 | 1 | 1.088788 | 0.821985 |
| 100.1333 | 1 | 0.997337 | 0.990983 |
| 83.33333 | 1 | 1.3996   | 0.311252 |
| 96.73333 | 1 | 1.06754  | 0.579716 |
| 107.2667 | 1 | 0.864823 | 0.574265 |
| 98       | 1 | 1.040476 | 0.567008 |
| 90.73333 | 1 | 1.204262 | 0.403826 |
| 101.6667 | 1 | 0.966885 | 0.723859 |
| 93.66667 | 1 | 1.135231 | 0.055413 |
| 91.06667 | 1 | 1.196193 | 0.115592 |
| 89.5     | 1 | 1.234637 | 0.264985 |
| 123.2    | 1 | 0.622835 | 0.049686 |
| 106.8333 | 1 | 0.872075 | 0.178799 |
| 91.43333 | 1 | 1.187751 | 0.001873 |
| 77.13333 | 1 | 1.592913 | 0.120715 |
| 98.46667 | 1 | 1.031483 | 0.866106 |

|          |   |          |          |
|----------|---|----------|----------|
| 106.1    | 1 | 0.8847   | 0.252712 |
| NA       | 0 | NA       | NA       |
| 100.6667 | 1 | 0.986755 | 0.926207 |
| 95.7     | 1 | 1.089864 | 0.489536 |
| 113.7333 | 1 | 0.758792 | 0.247901 |
| 92.26667 | 1 | 1.16763  | 0.342123 |
| 90.13333 | 1 | 1.218565 | 0.24971  |
| 104.6333 | 1 | 0.911437 | 0.728934 |
| 88.9     | 1 | 1.249719 | 0.403769 |
| 101.9    | 1 | 0.962709 | 0.488496 |
| 98.63333 | 1 | 1.027712 | 0.596726 |
| 96.7     | 1 | 1.068252 | 0.678367 |
| 98.46667 | 1 | 1.031144 | 0.803987 |
| 97.13333 | 1 | 1.058682 | 0.722402 |
| 92.46667 | 1 | 1.162942 | 0.50389  |
| 93       | 1 | 1.150896 | 0.033849 |
| 93.03333 | 1 | 1.150125 | 0.35859  |
| 98.73333 | 1 | 1.025996 | 0.839585 |
| 80.8     | 1 | 1.474835 | 0.238447 |
| 111.8    | 1 | 0.788909 | 0.402662 |
| 106.1    | 1 | 0.885014 | 0.40802  |
| 99.83333 | 1 | 1.003005 | 0.989363 |
| 82.86667 | 1 | 1.413516 | 0.148455 |
| 92.3     | 1 | 1.167208 | 0.48603  |
| 97.76667 | 1 | 1.045346 | 0.504621 |
| 84.6     | 1 | 1.364066 | 0.057714 |
| 95.8     | 1 | 1.087683 | 0.653632 |
| 97.76667 | 1 | 1.045687 | 0.754635 |
| 102.2667 | 1 | 0.955997 | 0.780432 |
| 89.96667 | 1 | 1.223416 | 0.341399 |
| 102.2333 | 1 | 0.956309 | 0.713454 |
| 84       | 1 | 1.380952 | 0.002796 |
| 100.8333 | 1 | 0.983471 | 0.911525 |
| 84.83333 | 1 | 1.357957 | 0.356078 |
| 90.1     | 1 | 1.219386 | 0.565335 |
| 97.73333 | 1 | 1.046726 | 0.658437 |
| 110.5    | 1 | 0.810256 | 0.013724 |
| 114.8    | 1 | 0.74158  | 0.448115 |
| NA       | 0 | NA       | NA       |
| 95.16667 | 1 | 1.101576 | 0.789613 |
| 97.03333 | 1 | 1.061147 | 0.799437 |
| 99.4     | 1 | 1.012408 | 0.968682 |
| 95.86667 | 1 | 1.086231 | 0.348315 |
| 82.63333 | 1 | 1.419927 | 0.452351 |
| 92.63333 | 1 | 1.15905  | 0.2474   |
| 62.23333 | 1 | 2.214247 | 0.126501 |
| 96.3     | 1 | 1.076843 | 0.470502 |
| 102.7    | 1 | 0.94742  | 0.470294 |
| 96.86667 | 1 | 1.064694 | 0.718136 |
| NA       | 0 | NA       | NA       |
| 103.8667 | 1 | 0.925546 | 0.421866 |



|          |   |          |          |
|----------|---|----------|----------|
| 98.46667 | 1 | 1.030806 | 0.893874 |
| 115.2333 | 1 | 0.735609 | 0.142423 |
| 87.43333 | 1 | 1.287838 | 0.138591 |
| 91.43333 | 1 | 1.187751 | 0.058279 |
| 104.3333 | 1 | 0.916933 | 0.637362 |
| 91.93333 | 1 | 1.175489 | 0.163655 |
| 94.46667 | 1 | 1.116796 | 0.628118 |
| 71.96667 | 1 | 1.779528 | 0.145883 |
| 109.1333 | 1 | 0.832926 | 0.735128 |
| 82.3     | 1 | 1.430134 | 0.203604 |
| 91.7     | 1 | 1.181025 | 0.410031 |
| 95.3     | 1 | 1.098286 | 0.473563 |
| 101.1333 | 1 | 0.977917 | 0.79721  |
| 92.16667 | 1 | 1.170344 | 0.425459 |
| 110.6    | 1 | 0.80862  | 0.560696 |
| 100.3    | 1 | 0.994018 | 0.965165 |
| 121.8667 | 1 | 0.640864 | 0.040455 |
| 108.1667 | 1 | 0.848998 | 0.074955 |
| 66.03333 | 1 | 2.029278 | 0.28384  |
| 90.16667 | 1 | 1.217745 | 0.041752 |
| 111      | 1 | 0.801502 | 0.681859 |
| 98.46667 | 1 | 1.031144 | 0.843544 |
| 104.4333 | 1 | 0.915097 | 0.217236 |
| 78.8     | 1 | 1.538071 | 0.012802 |
| 112.5    | 1 | 0.777481 | 0.354928 |
| 101.6667 | 1 | 0.967213 | 0.757491 |
| 98.26667 | 1 | 1.035278 | 0.86736  |
| 105.4    | 1 | 0.897849 | 0.231328 |
| 104.2333 | 1 | 0.918452 | 0.549705 |
| 107.7667 | 1 | 0.855861 | 0.64243  |
| NA       | 0 | NA       | NA       |
| 94.9     | 1 | 1.107482 | 0.445832 |
| 84.03333 | 1 | 1.380008 | 0.057383 |
| 94.73333 | 1 | 1.111189 | 0.700036 |
| 102.7333 | 1 | 0.946788 | 0.355009 |
| 103.1667 | 1 | 0.938934 | 0.889592 |
| 90.73333 | 1 | 1.203894 | 0.515973 |
| 77.53333 | 1 | 1.579536 | 0.303204 |
| NA       | 0 | NA       | NA       |
| 86       | 1 | 1.325581 | 0.237    |
| NA       | 0 | NA       | NA       |
| 101.1667 | 1 | 0.976606 | 0.784736 |
| 89.43333 | 1 | 1.236303 | 0.392841 |
| 90.13333 | 1 | 1.218565 | 0.20535  |
| 94.86667 | 1 | 1.108222 | 0.541001 |
| NA       | 0 | NA       | NA       |
| 83.63333 | 1 | 1.390992 | 0.234857 |
| 34.13333 | 1 | 4.859375 | 0.365062 |
| 97.1     | 1 | 1.059732 | 0.448012 |
| 110.6667 | 1 | 0.807229 | 0.59872  |
| 91.76667 | 1 | 1.179077 | 0.232519 |

|          |   |          |          |
|----------|---|----------|----------|
| 94.76667 | 1 | 1.110447 | 0.356135 |
| 94.63333 | 1 | 1.11342  | 0.390859 |
| NA       | 0 | NA       | NA       |
| NA       | 0 | NA       | NA       |
| 105.1667 | 1 | 0.901743 | 0.472088 |
| 107.5333 | 1 | 0.859578 | 0.213964 |
| 106.5    | 1 | 0.877934 | 0.098196 |
| 104.9333 | 1 | 0.90629  | 0.337576 |
| 91.16667 | 1 | 1.19415  | 0.468112 |
| 91.6     | 1 | 1.183406 | 0.429346 |
| NA       | 0 | NA       | NA       |
| 70.73333 | 1 | 1.827521 | 0.344532 |
| 93.73333 | 1 | 1.133713 | 0.199091 |
| NA       | 0 | NA       | NA       |
| 81.76667 | 1 | 1.445577 | 0.60801  |
| 93.8     | 1 | 1.132196 | 0.563099 |
| 90.13333 | 1 | 1.218935 | 0.024682 |
| 103.4    | 1 | 0.934236 | 0.420085 |
| 88.8     | 1 | 1.252628 | 0.356815 |
| 101.6333 | 1 | 0.967858 | 0.487857 |
| 87.43333 | 1 | 1.287076 | 0.085765 |
| 95.4     | 1 | 1.096436 | 0.535802 |
| 106.1667 | 1 | 0.883516 | 0.390625 |
| 100.1    | 1 | 0.997669 | 0.969072 |
| 104.9667 | 1 | 0.905684 | 0.543981 |
| NA       | 0 | NA       | NA       |
| 96.73333 | 1 | 1.067195 | 0.823931 |
| 97.93333 | 1 | 1.042206 | 0.758764 |
| 100.6    | 1 | 0.98774  | 0.890124 |
| 99.33333 | 1 | 1.014094 | 0.844076 |
| 94.7     | 1 | 1.11158  | 0.104684 |
| 104.7667 | 1 | 0.908686 | 0.405306 |
| 98.66667 | 1 | 1.027027 | 0.820667 |
| 104.8667 | 1 | 0.907184 | 0.170663 |
| 97.76667 | 1 | 1.045687 | 0.878615 |
| 94.43333 | 1 | 1.117543 | 0.332348 |
| 96.83333 | 1 | 1.065404 | 0.355855 |
| 92.8     | 1 | 1.154813 | 0.633675 |
| 98.63333 | 1 | 1.027712 | 0.675485 |
| 112.9333 | 1 | 0.770956 | 0.067254 |
| 86.46667 | 1 | 1.312259 | 0.280202 |
| 93.26667 | 1 | 1.144389 | 0.173145 |
| 95.83333 | 1 | 1.086957 | 0.223906 |
| 108.7333 | 1 | 0.839669 | 0.021335 |
| 98.2     | 1 | 1.03666  | 0.817548 |
| 94.9     | 1 | 1.107482 | 0.545788 |
| 97.6     | 1 | 1.04918  | 0.617169 |
| 101.1    | 1 | 0.978239 | 0.934953 |
| 107.7667 | 1 | 0.855861 | 0.544982 |
| 101.1333 | 1 | 0.977258 | 0.786981 |
| 105.6667 | 1 | 0.89306  | 0.119813 |

|          |   |          |          |
|----------|---|----------|----------|
| 112.7    | 1 | 0.774623 | 0.125308 |
| 107.7    | 1 | 0.85701  | 0.107356 |
| 100.4667 | 1 | 0.991042 | 0.907557 |
| 116.7    | 1 | 0.713796 | 0.167794 |
| 109.0333 | 1 | 0.834301 | 0.044395 |
| 97.96667 | 1 | 1.041511 | 0.489397 |
| 117.2667 | 1 | 0.705799 | 0.007246 |
| 89.46667 | 1 | 1.235469 | 0.476225 |
| 97       | 1 | 1.061512 | 0.688822 |
| 89.86667 | 1 | 1.22589  | 0.3731   |
| 101.8667 | 1 | 0.963351 | 0.637863 |
| 91.76667 | 1 | 1.179441 | 0.329101 |
| 117.9    | 1 | 0.696353 | 0.082866 |
| 100.8    | 1 | 0.984127 | 0.860705 |
| 101.9333 | 1 | 0.962067 | 0.88628  |
| 100.3    | 1 | 0.994018 | 0.973828 |
| 99.23333 | 1 | 1.015788 | 0.883357 |
| 106.5    | 1 | 0.878247 | 0.434132 |
| 98.26667 | 1 | 1.035617 | 0.785549 |
| 102.5    | 1 | 0.95122  | 0.795464 |
| 101.3333 | 1 | 0.973684 | 0.884738 |
| 101.1333 | 1 | 0.977587 | 0.846771 |
| 93.7     | 1 | 1.134116 | 0.443015 |
| 96.33333 | 1 | 1.076125 | 0.293504 |
| 93.3     | 1 | 1.143623 | 0.402936 |
| 87.96667 | 1 | 1.274346 | 0.085649 |
| 109.9667 | 1 | 0.818733 | 0.031959 |
| 93.4     | 1 | 1.140971 | 0.030677 |
| 104.7667 | 1 | 0.909004 | 0.323996 |
| 102.6    | 1 | 0.949318 | 0.687017 |
| 85.96667 | 1 | 1.326095 | 0.469047 |
| 95.4     | 1 | 1.096436 | 0.479978 |
| 85.23333 | 1 | 1.3465   | 0.3028   |
| 96.3     | 1 | 1.076843 | 0.627242 |
| NA       | 0 | NA       | NA       |
| 110.4667 | 1 | 0.810199 | 0.55236  |
| 99.86667 | 1 | 1.003338 | 0.991366 |
| 99.63333 | 1 | 1.00736  | 0.954845 |
| 113.9    | 1 | 0.755926 | 0.036074 |
| 86.76667 | 1 | 1.305033 | 0.390015 |
| 105.5    | 1 | 0.896051 | 0.512784 |
| 92.1     | 1 | 1.171191 | 0.407885 |
| 82.43333 | 1 | 1.426607 | 0.099061 |
| 101.3667 | 1 | 0.973364 | 0.806613 |
| 100.9    | 1 | 0.982161 | 0.926238 |
| 102.1333 | 1 | 0.958225 | 0.7945   |
| 98.8     | 1 | 1.024629 | 0.769099 |
| 98.3     | 1 | 1.034927 | 0.7882   |
| NA       | 0 | NA       | NA       |
| 108.6    | 1 | 0.841928 | 0.445767 |
| 88.76667 | 1 | 1.253474 | 0.080129 |

|          |   |          |          |
|----------|---|----------|----------|
| 90.46667 | 1 | 1.210759 | 0.675703 |
| 95.96667 | 1 | 1.08371  | 0.753649 |
| 98.86667 | 1 | 1.023264 | 0.869653 |
| 125.4667 | 1 | 0.594315 | 0.053353 |
| 99.53333 | 1 | 1.009712 | 0.938378 |
| 103.6667 | 1 | 0.92926  | 0.295175 |
| NA       | 0 | NA       | NA       |
| 106.2333 | 1 | 0.882962 | 0.250775 |
| NA       | 0 | NA       | NA       |
| 114.2    | 1 | 0.751313 | 0.016367 |
| 99.56667 | 1 | 1.009039 | 0.9583   |
| 91       | 1 | 1.197802 | 0.417524 |
| 97.06667 | 1 | 1.060783 | 0.766572 |
| NA       | 0 | NA       | NA       |
| 99.4     | 1 | 1.012743 | 0.90585  |
| 97.5     | 1 | 1.051282 | 0.805052 |
| 103.7667 | 1 | 0.927401 | 0.366531 |
| 85.33333 | 1 | 1.343359 | 0.376764 |
| 87.9     | 1 | 1.275313 | 0.022044 |
| 94.26667 | 1 | 1.121994 | 0.631028 |
| 106.1    | 1 | 0.885014 | 0.236686 |
| 87.46667 | 1 | 1.286585 | 0.299539 |
| 100.1333 | 1 | 0.997337 | 0.987283 |
| NA       | 0 | NA       | NA       |
| 83.3     | 1 | 1.40096  | 0.043311 |
| 99.66667 | 1 | 1.006355 | 0.965161 |
| 88.86667 | 1 | 1.250563 | 0.340294 |
| 111.8333 | 1 | 0.788376 | 0.400601 |
| 96.4     | 1 | 1.074689 | 0.541228 |
| 90.73333 | 1 | 1.204629 | 0.355318 |
| 87.46667 | 1 | 1.286585 | 0.409779 |
| 82.46667 | 1 | 1.424818 | 0.241576 |
| 99.2     | 1 | 1.016129 | 0.80525  |
| 100.4    | 1 | 0.992364 | 0.974219 |
| 90.06667 | 1 | 1.220577 | 0.18053  |
| 96.46667 | 1 | 1.073946 | 0.541896 |
| 106.9667 | 1 | 0.869741 | 0.286913 |
| 90.03333 | 1 | 1.221399 | 0.440406 |
| 89.23333 | 1 | 1.241315 | 0.210583 |
| 102.7    | 1 | 0.94742  | 0.807079 |
| 95.6     | 1 | 1.09205  | 0.095229 |
| 96.5     | 1 | 1.072539 | 0.70252  |
| 117.3667 | 1 | 0.704061 | 0.450681 |
| 101      | 1 | 0.979868 | 0.798198 |
| 90.36667 | 1 | 1.213205 | 0.075553 |
| 88.1     | 1 | 1.270148 | 0.265542 |
| 101.1667 | 1 | 0.976936 | 0.698619 |
| 62.2     | 1 | 2.21597  | 0.155045 |
| 92.3     | 1 | 1.166486 | 0.524734 |
| 84.36667 | 1 | 1.370605 | 0.173732 |
| 88.13333 | 1 | 1.269667 | 0.054063 |

|          |   |          |          |
|----------|---|----------|----------|
| 89       | 1 | 1.246816 | 0.502047 |
| 98.56667 | 1 | 1.029422 | 0.815758 |
| 86.66667 | 1 | 1.307692 | 0.154103 |
| 88.93333 | 1 | 1.248876 | 0.077218 |
| 68.43333 | 1 | 1.922552 | 0.094283 |
| NA       | 0 | NA       | NA       |
| 102.5667 | 1 | 0.950276 | 0.506119 |
| NA       | 0 | NA       | NA       |
| 85.33333 | 1 | 1.343359 | 0.122855 |
| 100.3667 | 1 | 0.992693 | 0.978886 |
| 95.36667 | 1 | 1.096819 | 0.567177 |
| 99.63333 | 1 | 1.007695 | 0.937902 |
| 107.9667 | 1 | 0.852424 | 0.233281 |
| 87.53333 | 1 | 1.284463 | 0.384251 |
| 100.8333 | 1 | 0.983802 | 0.920036 |
| 96.1     | 1 | 1.081165 | 0.366593 |
| 107.9333 | 1 | 0.852996 | 0.056563 |
| 97.7     | 1 | 1.046742 | 0.715758 |
| 70.66667 | 1 | 1.83066  | 0.090721 |
| 97.6     | 1 | 1.049522 | 0.484752 |
| 75.83333 | 1 | 1.636923 | 0.186515 |
| 97.7     | 1 | 1.046742 | 0.673039 |
| 124.7333 | 1 | 0.603421 | 0.335592 |
| 112.8667 | 1 | 0.772298 | 0.137461 |
| 91.66667 | 1 | 1.181818 | 0.504389 |
| 104.9333 | 1 | 0.905972 | 0.12979  |
| 100.9    | 1 | 0.98183  | 0.879139 |
| 97.6     | 1 | 1.049522 | 0.248345 |
| 89.73333 | 1 | 1.229198 | 0.388266 |
| 82.13333 | 1 | 1.435471 | 0.079425 |
| 94.9     | 1 | 1.107482 | 0.238537 |
| 99.06667 | 1 | 1.018843 | 0.807893 |
| 93.1     | 1 | 1.148586 | 0.352738 |
| 92.66667 | 1 | 1.158273 | 0.525303 |
| 97.23333 | 1 | 1.056908 | 0.567966 |
| 80.73333 | 1 | 1.477704 | 0.020374 |
| 99.83333 | 1 | 1.003339 | 0.99422  |
| NA       | 0 | NA       | NA       |
| 92.1     | 1 | 1.171915 | 0.44703  |
| 103.6667 | 1 | 0.92926  | 0.610802 |
| 106.1667 | 1 | 0.884144 | 0.554454 |
| 89.06667 | 1 | 1.245883 | 0.311561 |
| 88.8     | 1 | 1.252628 | 0.217848 |
| 79.3     | 1 | 1.522068 | 0.387272 |
| 108.9333 | 1 | 0.835985 | 0.103281 |
| 93       | 1 | 1.150896 | 0.232472 |
| 87.46667 | 1 | 1.286966 | 0.529187 |
| 106.8333 | 1 | 0.872387 | 0.052992 |
| 98.16667 | 1 | 1.037351 | 0.82392  |
| 109.8333 | 1 | 0.820637 | 0.10805  |
| 109.6333 | 1 | 0.824567 | 0.289697 |

|          |   |          |          |
|----------|---|----------|----------|
| 100.5667 | 1 | 0.988731 | 0.917363 |
| 99.16667 | 1 | 1.016807 | 0.935482 |
| 97.83333 | 1 | 1.044293 | 0.59109  |
| NA       | 0 | NA       | NA       |
| 99.76667 | 1 | 1.004678 | 0.953351 |
| 105.4    | 1 | 0.897849 | 0.793855 |
| 96.66667 | 1 | 1.068621 | 0.764506 |
| 97.63333 | 1 | 1.048139 | 0.610049 |
| 102.5333 | 1 | 0.950585 | 0.780804 |
| 89.5     | 1 | 1.235009 | 0.254163 |
| 101.8333 | 1 | 0.963993 | 0.75674  |
| 106.3667 | 1 | 0.880602 | 0.406201 |
| 82.33333 | 1 | 1.42915  | 0.157279 |
| 89.76667 | 1 | 1.22837  | 0.542124 |
| 110.8    | 1 | 0.805054 | 0.511616 |
| 99.1     | 1 | 1.018163 | 0.820336 |
| 104.8667 | 1 | 0.906866 | 0.550665 |
| NA       | 0 | NA       | NA       |
| 99.03333 | 1 | 1.019522 | 0.907549 |
| 95.9     | 1 | 1.085158 | 0.671764 |
| 87.6     | 1 | 1.282725 | 0.244428 |
| 99.63333 | 1 | 1.00736  | 0.961138 |
| 101.8    | 1 | 0.964309 | 0.838488 |
| 105      | 1 | 0.904762 | 0.228914 |
| 100.3    | 1 | 0.993686 | 0.935919 |
| 102.7667 | 1 | 0.946156 | 0.221955 |
| 92.46667 | 1 | 1.162942 | 0.556338 |
| 94.63333 | 1 | 1.113068 | 0.164464 |
| 97.56667 | 1 | 1.050222 | 0.804183 |
| 87.9     | 1 | 1.275313 | 0.039515 |
| 96.4     | 1 | 1.074689 | 0.846486 |
| 115.5333 | 1 | 0.731102 | 0.167384 |
| 96.93333 | 1 | 1.063618 | 0.617004 |
| 96.46667 | 1 | 1.073601 | 0.479409 |
| 95.93333 | 1 | 1.085129 | 0.844305 |
| 92.23333 | 1 | 1.168413 | 0.422233 |
| 105.5667 | 1 | 0.894537 | 0.390589 |
| 88.76667 | 1 | 1.252722 | 0.130575 |
| 118.9667 | 1 | 0.681143 | 0.251243 |
| 97.86667 | 1 | 1.043597 | 0.755641 |
| 102.5667 | 1 | 0.949626 | 0.56215  |
| 83.73333 | 1 | 1.388535 | 0.352386 |
| 88.46667 | 1 | 1.260739 | 0.111191 |
| NA       | 0 | NA       | NA       |
| 103.7667 | 1 | 0.92708  | 0.387363 |
| 99.43333 | 1 | 1.011398 | 0.916011 |
| 92.66667 | 1 | 1.158273 | 0.354041 |
| 91.46667 | 1 | 1.186224 | 0.453174 |
| 100.4667 | 1 | 0.991042 | 0.867024 |
| 96.5     | 1 | 1.072539 | 0.62069  |
| 117.4    | 1 | 0.703578 | 0.569112 |

|          |   |          |          |
|----------|---|----------|----------|
| 96.86667 | 1 | 1.065038 | 0.817067 |
| NA       | 0 | NA       | NA       |
| 100.7667 | 1 | 0.985114 | 0.929684 |
| NA       | 0 | NA       | NA       |
| 96.03333 | 1 | 1.082263 | 0.737821 |
| 90.73333 | 1 | 1.204262 | 0.080397 |
| 84.2     | 1 | 1.374901 | 0.224829 |
| 101.9    | 1 | 0.962709 | 0.702618 |
| 100.2333 | 1 | 0.995012 | 0.968901 |
| 87.03333 | 1 | 1.298353 | 0.237955 |
| 83.23333 | 1 | 1.403284 | 0.393758 |
| 95.66667 | 1 | 1.090592 | 0.708359 |
| 89.6     | 1 | 1.231771 | 0.07886  |
| 100.0667 | 1 | 0.999001 | 0.988363 |
| 102.4    | 1 | 0.952799 | 0.853149 |
| 110.3667 | 1 | 0.812141 | 0.019383 |
| 82.8     | 1 | 1.414654 | 0.083407 |
| 117.7    | 1 | 0.699235 | 0.015717 |
| NA       | 0 | NA       | NA       |
| 110.2333 | 1 | 0.814333 | 0.163408 |
| 106.4    | 1 | 0.879699 | 0.370596 |
| NA       | 0 | NA       | NA       |
| 132.2    | 1 | 0.512859 | 0.184113 |
| 92.7     | 1 | 1.157138 | 0.469851 |
| 105.2    | 1 | 0.901141 | 0.660571 |
| 95.86667 | 1 | 1.086231 | 0.714848 |
| 97.7     | 1 | 1.047424 | 0.758998 |
| 85.4     | 1 | 1.34153  | 0.279632 |
| 105.6333 | 1 | 0.893342 | 0.587658 |
| 136.9333 | 1 | 0.460808 | 0.4262   |
| 102.9    | 1 | 0.943311 | 0.690465 |
| 82.4     | 1 | 1.427184 | 0.325519 |
| 99.93333 | 1 | 1.001334 | 0.992081 |
| 99.03333 | 1 | 1.019522 | 0.777397 |
| 84.1     | 1 | 1.378121 | 0.494752 |
| 99.93333 | 1 | 1.001334 | 0.993826 |
| 94.4     | 1 | 1.118644 | 0.764449 |
| 107.1667 | 1 | 0.866252 | 0.16094  |
| 93.63333 | 1 | 1.136347 | 0.332979 |
| 92.53333 | 1 | 1.161383 | 0.577044 |
| 101.9667 | 1 | 0.961425 | 0.692917 |
| 91.43333 | 1 | 1.187751 | 0.270507 |
| NA       | 0 | NA       | NA       |
| NA       | 0 | NA       | NA       |
| 102      | 1 | 0.960784 | 0.818073 |
| 90.8     | 1 | 1.202643 | 0.532876 |
| 84.06667 | 1 | 1.379064 | 0.351277 |
| 111.0333 | 1 | 0.801261 | 0.405559 |
| 94.23333 | 1 | 1.122391 | 0.442421 |
| NA       | 0 | NA       | NA       |
| 105.3333 | 1 | 0.898734 | 0.1695   |

|          |   |          |          |
|----------|---|----------|----------|
| 90.56667 | 1 | 1.208318 | 0.215426 |
| 90.06667 | 1 | 1.220947 | 0.288018 |
| 93.06667 | 1 | 1.148639 | 0.417531 |
| 56.56667 | 1 | 2.535651 | 0.232144 |
| 96.53333 | 1 | 1.071478 | 0.410526 |
| 105.7    | 1 | 0.892148 | 0.083307 |
| 114.6    | 1 | 0.745492 | 0.534975 |
| 106.3    | 1 | 0.881468 | 0.502875 |
| 89.33333 | 1 | 1.238806 | 0.377388 |
| 101.8    | 1 | 0.964964 | 0.741985 |
| NA       | 0 | NA       | NA       |
| 92.03333 | 1 | 1.173126 | 0.428724 |
| 99.3     | 1 | 1.014434 | 0.897176 |
| 93       | 1 | 1.150896 | 0.266677 |
| 107.8    | 1 | 0.854978 | 0.443224 |
| 81.13333 | 1 | 1.465489 | 0.355161 |
| 105.1333 | 1 | 0.902663 | 0.095595 |
| 100.8667 | 1 | 0.982485 | 0.805111 |
| 105.1333 | 1 | 0.902029 | 0.272603 |
| 97.56667 | 1 | 1.049197 | 0.565066 |
| 93.83333 | 1 | 1.131794 | 0.710535 |
| 103.3667 | 1 | 0.93486  | 0.175428 |
| 90.5     | 1 | 1.209945 | 0.257933 |
| 101.3667 | 1 | 0.973364 | 0.645369 |
| 84.33333 | 1 | 1.371542 | 0.261973 |
| 113.4    | 1 | 0.763374 | 0.389904 |
| 83.66667 | 1 | 1.390837 | 0.061755 |
| NA       | 0 | NA       | NA       |
| 105.9333 | 1 | 0.88798  | 0.361662 |
| 105.3    | 1 | 0.899335 | 0.608566 |
| 105.5333 | 1 | 0.895136 | 0.610083 |
| 99.66667 | 1 | 1.007023 | 0.95521  |
| NA       | 0 | NA       | NA       |
| NA       | 0 | NA       | NA       |
| 102.2    | 1 | 0.956947 | 0.798737 |
| 101.8333 | 1 | 0.963993 | 0.770845 |
| 89.1     | 1 | 1.244669 | 0.213599 |
| 92.03333 | 1 | 1.173126 | 0.532828 |
| 88.63333 | 1 | 1.256111 | 0.286127 |
| NA       | 0 | NA       | NA       |
| 99.03333 | 1 | 1.019522 | 0.737931 |
| 95.66667 | 1 | 1.090941 | 0.583111 |
| 81       | 1 | 1.468724 | 0.256865 |
| 114.0333 | 1 | 0.753873 | 0.230086 |
| 107.6667 | 1 | 0.857895 | 0.20746  |
| 105.4333 | 1 | 0.896617 | 0.537234 |
| NA       | 0 | NA       | NA       |
| 105.2667 | 1 | 0.899937 | 0.469746 |
| NA       | 0 | NA       | NA       |
| 76.63333 | 1 | 1.60983  | 0.148248 |
| 105.9    | 1 | 0.888259 | 0.286966 |



|          |   |          |          |
|----------|---|----------|----------|
| 94.66667 | 1 | 1.112324 | 0.592205 |
| NA       | 0 | NA       | NA       |
| 107.5667 | 1 | 0.859622 | 0.752573 |
| 86.16667 | 1 | 1.321083 | 0.351243 |
| 80.93333 | 1 | 1.471582 | 0.165693 |
| 98.56667 | 1 | 1.029084 | 0.69345  |
| NA       | 0 | NA       | NA       |
| 101.6667 | 1 | 0.967541 | 0.90668  |
| 112.0667 | 1 | 0.784652 | 0.269247 |
| 91.83333 | 1 | 1.177858 | 0.665541 |
| 109.1333 | 1 | 0.832926 | 0.001599 |
| 90.9     | 1 | 1.20022  | 0.106518 |
| NA       | 0 | NA       | NA       |
| 111.7    | 1 | 0.79051  | 0.011381 |
| 101.8333 | 1 | 0.963993 | 0.847105 |
| 102.9    | 1 | 0.943959 | 0.560713 |
| 100.7667 | 1 | 0.985114 | 0.935335 |
| 107.9333 | 1 | 0.852996 | 0.537747 |
| 94.1     | 1 | 1.125399 | 0.290697 |
| 106.9667 | 1 | 0.86943  | 0.159603 |
| 87.7     | 1 | 1.280882 | 0.502052 |
| 84.93333 | 1 | 1.354788 | 0.312245 |
| 98.1     | 1 | 1.039076 | 0.836565 |
| 96.83333 | 1 | 1.06506  | 0.313005 |
| NA       | 0 | NA       | NA       |
| 111.1333 | 1 | 0.79964  | 0.124965 |
| 111.6333 | 1 | 0.79158  | 0.400826 |
| 112.7667 | 1 | 0.773574 | 0.21459  |
| NA       | 0 | NA       | NA       |
| 86.16667 | 1 | 1.321083 | 0.002403 |
| 84.6     | 1 | 1.364066 | 0.163108 |
| 101.1667 | 1 | 0.976606 | 0.809143 |
| 89.7     | 1 | 1.229654 | 0.249811 |
| 103.2667 | 1 | 0.937056 | 0.499754 |
| 99.8     | 1 | 1.003674 | 0.988961 |
| 79.5     | 1 | 1.515723 | 0.228649 |
| 98.93333 | 1 | 1.021563 | 0.910151 |
| NA       | 0 | NA       | NA       |
| 98.76667 | 1 | 1.024975 | 0.822871 |
| 92.13333 | 1 | 1.171129 | 0.496504 |
| 84.16667 | 1 | 1.376634 | 0.43091  |
| 87.33333 | 1 | 1.290458 | 0.280626 |
| 101.1667 | 1 | 0.976606 | 0.822249 |
| 94.73333 | 1 | 1.111541 | 0.670859 |
| 96.96667 | 1 | 1.062221 | 0.724327 |
| 84.23333 | 1 | 1.374357 | 0.280107 |
| 76.33333 | 1 | 1.620524 | 0.387256 |
| 99.3     | 1 | 1.014434 | 0.903041 |
| 116.1    | 1 | 0.722653 | 0.36642  |
| 92.63333 | 1 | 1.15905  | 0.35013  |
| 94.43333 | 1 | 1.118249 | 0.390305 |

|          |   |          |          |
|----------|---|----------|----------|
| 96.93333 | 1 | 1.06293  | 0.33403  |
| 93.3     | 1 | 1.143623 | 0.359893 |
| 93.33333 | 1 | 1.142857 | 0.202635 |
| 90.5     | 1 | 1.209576 | 0.380517 |
| 91.2     | 1 | 1.193348 | 0.460394 |
| NA       | 0 | NA       | NA       |
| 92.8     | 1 | 1.155172 | 0.210186 |
| 95.26667 | 1 | 1.09902  | 0.626364 |
| 98.7     | 1 | 1.026342 | 0.758414 |
| 105.4    | 1 | 0.897533 | 0.311146 |
| 101      | 1 | 0.980198 | 0.90043  |
| 100.8    | 1 | 0.984127 | 0.873716 |
| NA       | 0 | NA       | NA       |
| 79.63333 | 1 | 1.511511 | 0.157988 |
| NA       | 0 | NA       | NA       |
| 89.03333 | 1 | 1.24635  | 0.280818 |
| 96.7     | 1 | 1.068252 | 0.81858  |
| 131.1333 | 1 | 0.525165 | 0.010345 |
| 95.93333 | 1 | 1.084781 | 0.734609 |
| NA       | 0 | NA       | NA       |
| 90.63333 | 1 | 1.206694 | 0.280011 |
| 100.4    | 1 | 0.992364 | 0.961093 |
| 94.3     | 1 | 1.121244 | 0.601463 |
| 103.9667 | 1 | 0.923373 | 0.565997 |
| 95.3     | 1 | 1.098286 | 0.647811 |
| 104.2333 | 1 | 0.918772 | 0.631363 |
| NA       | 0 | NA       | NA       |
| 108.7333 | 1 | 0.839362 | 0.724493 |
| 100.7    | 1 | 0.986428 | 0.799015 |
| 107.3667 | 1 | 0.862776 | 0.174521 |
| 96.43333 | 1 | 1.073626 | 0.346304 |
| 109.3667 | 1 | 0.828406 | 0.044768 |
| 104.4    | 1 | 0.91539  | 0.648736 |
| 94.93333 | 1 | 1.106742 | 0.026795 |
| 95.63333 | 1 | 1.091321 | 0.506738 |
| 129.8333 | 1 | 0.540693 | 0.213077 |
| 83.16667 | 1 | 1.40481  | 0.014061 |
| 96.2     | 1 | 1.079002 | 0.665469 |
| NA       | 0 | NA       | NA       |
| NA       | 0 | NA       | NA       |
| 107      | 1 | 0.869159 | 0.488007 |
| 88.63333 | 1 | 1.256487 | 0.154296 |
| NA       | 0 | NA       | NA       |
| 100.1667 | 1 | 0.996672 | 0.987735 |
| 86.53333 | 1 | 1.311633 | 0.178515 |
| 86.2     | 1 | 1.320572 | 0.027527 |
| NA       | 0 | NA       | NA       |
| 60       | 1 | 2.333333 | 0.201531 |
| 100.1333 | 1 | 0.997337 | 0.989583 |
| 100.1667 | 1 | 0.996672 | 0.987732 |
| NA       | 0 | NA       | NA       |

|          |   |          |          |
|----------|---|----------|----------|
| 94.46667 | 1 | 1.117149 | 0.280732 |
| 107.9667 | 1 | 0.852115 | 0.066435 |
| 104.7    | 1 | 0.909901 | 0.335822 |
| 94.73333 | 1 | 1.111189 | 0.281765 |
| 90.76667 | 1 | 1.203452 | 0.700473 |
| NA       | 0 | NA       | NA       |
| 93.06667 | 1 | 1.148997 | 0.317769 |
| 106.4333 | 1 | 0.879111 | 0.666827 |
| 83.93333 | 1 | 1.383241 | 0.397923 |
| 103.7667 | 1 | 0.927401 | 0.749778 |
| 99.03333 | 1 | 1.019185 | 0.644022 |
| 109.4667 | 1 | 0.82704  | 0.345044 |
| 86.46667 | 1 | 1.312645 | 0.193001 |
| 101.7333 | 1 | 0.965596 | 0.930145 |
| 89.7     | 1 | 1.229283 | 0.471537 |
| NA       | 0 | NA       | NA       |
| 89.23333 | 1 | 1.240568 | 0.300187 |
| 115.1667 | 1 | 0.736614 | 0.277994 |
| 98.56667 | 1 | 1.029422 | 0.876883 |
| 100.0667 | 1 | 0.998668 | 0.992859 |
| NA       | 0 | NA       | NA       |
| 110.4667 | 1 | 0.810199 | 0.36704  |
| 95       | 1 | 1.105263 | 0.308063 |
| 102.9333 | 1 | 0.943005 | 0.749373 |
| 102.4667 | 1 | 0.951529 | 0.356577 |
| 89.4     | 1 | 1.236764 | 0.386088 |
| 105.1333 | 1 | 0.902663 | 0.310279 |
| 95.33333 | 1 | 1.097902 | 0.503689 |
| 101.7667 | 1 | 0.96528  | 0.788028 |
| 63.2     | 1 | 2.164557 | 0.257097 |
| NA       | 0 | NA       | NA       |
| NA       | 0 | NA       | NA       |
| 93.4     | 1 | 1.141685 | 0.602206 |
| 109.4333 | 1 | 0.827597 | 0.380335 |
| NA       | 0 | NA       | NA       |
| 96.16667 | 1 | 1.079723 | 0.494633 |
| 85.1     | 1 | 1.350176 | 0.171556 |
| 86.56667 | 1 | 1.310358 | 0.403663 |
| 109.2    | 1 | 0.831197 | 0.357155 |
| 95.1     | 1 | 1.103049 | 0.202696 |
| 85.66667 | 1 | 1.335019 | 0.332888 |
| NA       | 0 | NA       | NA       |
| 100.9    | 1 | 0.982491 | 0.843809 |
| 95.43333 | 1 | 1.095704 | 0.118977 |
| 103.1333 | 1 | 0.93956  | 0.481439 |
| 101.6333 | 1 | 0.967858 | 0.3785   |
| 86.53333 | 1 | 1.311633 | 0.417955 |
| 112.6667 | 1 | 0.775148 | 0.017918 |
| 90.66667 | 1 | 1.205882 | 0.078175 |
| 111.1    | 1 | 0.80018  | 0.058072 |
| 103.7    | 1 | 0.92864  | 0.748918 |

|          |   |          |          |
|----------|---|----------|----------|
| 85.43333 | 1 | 1.341007 | 0.186097 |
| 94.6     | 1 | 1.114165 | 0.26607  |
| 92.6     | 1 | 1.159827 | 0.512286 |
| NA       | 0 | NA       | NA       |
| 98.63333 | 1 | 1.027712 | 0.394886 |
| 97.73333 | 1 | 1.046044 | 0.742724 |
| 118.9333 | 1 | 0.681614 | 0.344005 |
| 96.7     | 1 | 1.068597 | 0.674788 |
| 101.0333 | 1 | 0.979215 | 0.892882 |
| 90.5     | 1 | 1.209945 | 0.469016 |
| NA       | 0 | NA       | NA       |
| 111.7    | 1 | 0.79051  | 0.29971  |
| 86.66667 | 1 | 1.308077 | 0.344934 |
| 91       | 1 | 1.197436 | 0.289856 |
| 81.26667 | 1 | 1.460623 | 0.337528 |
| 87.56667 | 1 | 1.284355 | 0.37505  |
| 94.6     | 1 | 1.114165 | 0.610758 |
| 99.6     | 1 | 1.007697 | 0.934879 |
| 88.76667 | 1 | 1.253098 | 0.384084 |
| 80.76667 | 1 | 1.476269 | 0.099972 |
| 90.66667 | 1 | 1.205515 | 0.204926 |
| NA       | 0 | NA       | NA       |
| 101.5667 | 1 | 0.968822 | 0.848589 |
| 100.3667 | 1 | 0.992693 | 0.873062 |
| NA       | 0 | NA       | NA       |
| 100.5    | 1 | 0.99005  | 0.920997 |
| 113.4333 | 1 | 0.763444 | 0.136788 |
| NA       | 0 | NA       | NA       |
| 105.4667 | 1 | 0.896334 | 0.68755  |
| 92.7     | 1 | 1.157497 | 0.209337 |
| 99.93333 | 1 | 1.001334 | 0.982198 |
| 104.8    | 1 | 0.908397 | 0.693336 |
| 88.76667 | 1 | 1.253098 | 0.187659 |
| 96.53333 | 1 | 1.071823 | 0.458442 |
| 100.3    | 1 | 0.993686 | 0.927883 |
| 94.53333 | 1 | 1.115656 | 0.738869 |
| 92.8     | 1 | 1.155172 | 0.713973 |
| NA       | 0 | NA       | NA       |
| 101.6333 | 1 | 0.968186 | 0.618671 |
| 86.4     | 1 | 1.314815 | 0.264061 |
| 92.4     | 1 | 1.164141 | 0.284746 |
| 99.33333 | 1 | 1.013423 | 0.876308 |
| 97.13333 | 1 | 1.059369 | 0.57802  |
| NA       | 0 | NA       | NA       |
| 94.23333 | 1 | 1.122391 | 0.386918 |
| NA       | 0 | NA       | NA       |
| 98.36667 | 1 | 1.033209 | 0.925668 |
| 89.33333 | 1 | 1.238433 | 0.197497 |
| NA       | 0 | NA       | NA       |
| 108.8667 | 1 | 0.83711  | 0.181216 |
| NA       | 0 | NA       | NA       |

|          |   |          |          |
|----------|---|----------|----------|
| 94.83333 | 1 | 1.108963 | 0.692851 |
| 84.4     | 1 | 1.369668 | 0.137564 |
| 81.46667 | 1 | 1.455401 | 0.422673 |
| NA       | 0 | NA       | NA       |
| 75.3     | 1 | 1.656042 | 0.368523 |
| NA       | 0 | NA       | NA       |
| 90.2     | 1 | 1.217295 | 0.220204 |
| NA       | 0 | NA       | NA       |
| 92.86667 | 1 | 1.153625 | 0.378465 |
| NA       | 0 | NA       | NA       |
| 85.56667 | 1 | 1.337359 | 0.220747 |
| 83.63333 | 1 | 1.391391 | 0.100691 |
| 84.03333 | 1 | 1.380008 | 0.28596  |
| 94.86667 | 1 | 1.108222 | 0.209632 |
| 101.8    | 1 | 0.964964 | 0.843854 |
| NA       | 0 | NA       | NA       |
| 102      | 1 | 0.960784 | 0.655992 |
| 79.93333 | 1 | 1.502085 | 0.241751 |
| NA       | 0 | NA       | NA       |
| NA       | 0 | NA       | NA       |
| NA       | 0 | NA       | NA       |
| 86.63333 | 1 | 1.30858  | 0.198709 |
| 88.16667 | 1 | 1.268431 | 0.411242 |
| 97.96667 | 1 | 1.041511 | 0.732715 |
| 100.8333 | 1 | 0.983471 | 0.813929 |
| 94.76667 | 1 | 1.110095 | 0.286131 |
| NA       | 0 | NA       | NA       |
| 91.16667 | 1 | 1.193784 | 0.068418 |
| NA       | 0 | NA       | NA       |
| 101.3    | 1 | 0.974663 | 0.80771  |
| 94.9     | 1 | 1.108184 | 0.592363 |
| 91       | 1 | 1.197802 | 0.503016 |
| 76.86667 | 1 | 1.601908 | 0.354452 |
| 100.4    | 1 | 0.992032 | 0.918323 |
| 94.63333 | 1 | 1.113068 | 0.318264 |
| 82.23333 | 1 | 1.432104 | 0.242013 |
| 106.6667 | 1 | 0.875    | 0.214995 |
| 80.86667 | 1 | 1.473207 | 0.463951 |
| 99.36667 | 1 | 1.012412 | 0.941651 |
| NA       | 0 | NA       | NA       |
| 101.3333 | 1 | 0.974013 | 0.689466 |
| 99.6     | 1 | 1.007697 | 0.945278 |
| 93.83333 | 1 | 1.131083 | 0.386127 |
| 92.73333 | 1 | 1.156722 | 0.516666 |
| NA       | 0 | NA       | NA       |
| 92.1     | 1 | 1.171553 | 0.233506 |
| 94.63333 | 1 | 1.11342  | 0.651063 |
| NA       | 0 | NA       | NA       |
| 92.86667 | 1 | 1.153984 | 0.500091 |
| 114.5667 | 1 | 0.745999 | 0.148555 |
| 104.6667 | 1 | 0.910828 | 0.517305 |

|          |   |          |          |
|----------|---|----------|----------|
| 85       | 1 | 1.352549 | 0.15566  |
| 94.2     | 1 | 1.122788 | 0.439318 |
| 91.36667 | 1 | 1.188982 | 0.49007  |
| 109.7667 | 1 | 0.822047 | 0.327724 |
| 110.6333 | 1 | 0.807472 | 0.492573 |
| NA       | 0 | NA       | NA       |
| NA       | 0 | NA       | NA       |
| 91       | 1 | 1.197802 | 0.112723 |
| 98.5     | 1 | 1.030457 | 0.875666 |
| NA       | 0 | NA       | NA       |
| 102.1333 | 1 | 0.957898 | 0.848657 |
| 94       | 1 | 1.12766  | 0.103855 |
| NA       | 0 | NA       | NA       |
| 93.43333 | 1 | 1.140564 | 0.477142 |
| NA       | 0 | NA       | NA       |
| NA       | 0 | NA       | NA       |
| 100.3    | 1 | 0.99435  | 0.95917  |
| 130.7667 | 1 | 0.529442 | 0.153298 |
| 96.9     | 1 | 1.063639 | 0.583711 |
| 77.1     | 1 | 1.594034 | 0.027945 |
| 102.8    | 1 | 0.94585  | 0.740486 |
| 104.2    | 1 | 0.919386 | 0.194323 |
| NA       | 0 | NA       | NA       |
| 92.6     | 1 | 1.159827 | 0.251985 |
| 94.43333 | 1 | 1.117896 | 0.797288 |
| NA       | 0 | NA       | NA       |
| 107      | 1 | 0.869159 | 0.716377 |
| 108.2667 | 1 | 0.847599 | 0.302221 |
| 105.8    | 1 | 0.890044 | 0.048956 |
| 115.8    | 1 | 0.727116 | 0.091651 |
| 93.03333 | 1 | 1.149767 | 0.39193  |
| NA       | 0 | NA       | NA       |
| 90.93333 | 1 | 1.19978  | 0.133558 |
| NA       | 0 | NA       | NA       |
| NA       | 0 | NA       | NA       |
| 104.2    | 1 | 0.919706 | 0.667087 |
| 101.7667 | 1 | 0.965608 | 0.895737 |
| 103.2333 | 1 | 0.937359 | 0.59875  |
| NA       | 0 | NA       | NA       |
| NA       | 0 | NA       | NA       |
| 99.16667 | 1 | 1.017143 | 0.921638 |
| 87.86667 | 1 | 1.276555 | 0.363607 |
| 106.8    | 1 | 0.872971 | 0.331575 |
| 99.2     | 1 | 1.016465 | 0.933249 |
| 95.33333 | 1 | 1.098252 | 0.524629 |
| NA       | 0 | NA       | NA       |
| 106.6667 | 1 | 0.875    | 0.43524  |
| NA       | 0 | NA       | NA       |
| 104.5    | 1 | 0.913876 | 0.655507 |
| 97.3     | 1 | 1.055498 | 0.639536 |
| NA       | 0 | NA       | NA       |

|          |   |          |          |
|----------|---|----------|----------|
| 101.2    | 1 | 0.975955 | 0.832183 |
| NA       | 0 | NA       | NA       |
| 97.5     | 1 | 1.05094  | 0.848431 |
| 96.5     | 1 | 1.072539 | 0.571526 |
| NA       | 0 | NA       | NA       |
| 104.0333 | 1 | 0.92214  | 0.447975 |
| NA       | 0 | NA       | NA       |
| NA       | 0 | NA       | NA       |
| 74.03333 | 1 | 1.701486 | 0.268842 |
| 103.5667 | 1 | 0.931123 | 0.536616 |
| 108.0667 | 1 | 0.850709 | 0.24864  |
| 104.5667 | 1 | 0.912655 | 0.7506   |
| NA       | 0 | NA       | NA       |
| 95.3     | 1 | 1.098636 | 0.546042 |
| 95.96667 | 1 | 1.084404 | 0.660858 |
| 93.4     | 1 | 1.141685 | 0.711235 |
| 108.8333 | 1 | 0.837979 | 0.37754  |
| 81       | 1 | 1.469136 | 0.039419 |
| 103      | 1 | 0.942071 | 0.621643 |
| 91.63333 | 1 | 1.182612 | 0.611022 |
| NA       | 0 | NA       | NA       |
| 94.5     | 1 | 1.116402 | 0.379441 |
| 112.2    | 1 | 0.782531 | 0.307369 |
| NA       | 0 | NA       | NA       |
| NA       | 0 | NA       | NA       |
| 89.66667 | 1 | 1.230483 | 0.346828 |
| 95.4     | 1 | 1.096436 | 0.75721  |
| NA       | 0 | NA       | NA       |
| 78.36667 | 1 | 1.552105 | 0.371252 |
| 91.43333 | 1 | 1.187386 | 0.263998 |
| NA       | 0 | NA       | NA       |
| NA       | 0 | NA       | NA       |
| NA       | 0 | NA       | NA       |
| 105.6667 | 1 | 0.892744 | 0.599308 |
| 91.56667 | 1 | 1.184201 | 0.704854 |
| 72.93333 | 1 | 1.74223  | 0.266072 |
| NA       | 0 | NA       | NA       |
| NA       | 0 | NA       | NA       |
| 99.43333 | 1 | 1.011398 | 0.966393 |
| 85.33333 | 1 | 1.34375  | 0.234511 |
| 95.3     | 1 | 1.098986 | 0.678135 |
| 115.3667 | 1 | 0.733314 | 0.121669 |
| NA       | 0 | NA       | NA       |
| 104.5667 | 1 | 0.912655 | 0.555023 |
| NA       | 0 | NA       | NA       |
| 98.33333 | 1 | 1.033898 | 0.79485  |
| 92.66667 | 1 | 1.158273 | 0.431869 |
| NA       | 0 | NA       | NA       |
| 99.7     | 1 | 1.006018 | 0.97918  |
| 96.33333 | 1 | 1.075779 | 0.143073 |
| 129      | 1 | 0.550129 | 0.453312 |

|          |   |          |          |
|----------|---|----------|----------|
| 134.5    | 1 | 0.486989 | 0.040429 |
| 98.16667 | 1 | 1.037351 | 0.755268 |
| NA       | 0 | NA       | NA       |
| 99.46667 | 1 | 1.010389 | 0.949885 |
| NA       | 0 | NA       | NA       |
| 94.36667 | 1 | 1.119392 | 0.68218  |
| NA       | 0 | NA       | NA       |
| 106.4    | 1 | 0.880013 | 0.01684  |
| NA       | 0 | NA       | NA       |
| 100.5667 | 1 | 0.988399 | 0.966239 |
| 98.96667 | 1 | 1.020882 | 0.917979 |
| 110.1333 | 1 | 0.815981 | 0.053021 |
| 98.23333 | 1 | 1.035969 | 0.768771 |
| 103.9667 | 1 | 0.923373 | 0.848879 |
| 95.13333 | 1 | 1.101962 | 0.701521 |
| 96.33333 | 1 | 1.076125 | 0.73838  |
| 95.7     | 1 | 1.089864 | 0.351063 |
| NA       | 0 | NA       | NA       |
| 98.3     | 1 | 1.034588 | 0.718854 |
| NA       | 0 | NA       | NA       |
| 88.96667 | 1 | 1.248033 | 0.038705 |
| 109.1333 | 1 | 0.832621 | 0.142019 |
| 105.9333 | 1 | 0.88798  | 0.05579  |
| 97.1     | 1 | 1.059732 | 0.364577 |
| 91.86667 | 1 | 1.177431 | 0.554626 |
| 98.53333 | 1 | 1.030108 | 0.58271  |
| NA       | 0 | NA       | NA       |
| NA       | 0 | NA       | NA       |
| 95.53333 | 1 | 1.093859 | 0.739454 |
| 108.6    | 1 | 0.841314 | 0.347564 |
| 104.8667 | 1 | 0.907184 | 0.688585 |
| 102.0333 | 1 | 0.960144 | 0.735297 |
| 92.9     | 1 | 1.152853 | 0.151378 |
| 107.0667 | 1 | 0.867995 | 0.130281 |
| NA       | 0 | NA       | NA       |
| NA       | 0 | NA       | NA       |
| 99.4     | 1 | 1.012072 | 0.90948  |
| 114.7333 | 1 | 0.743173 | 0.33942  |
| 123.8667 | 1 | 0.614639 | 0.076548 |
| 111.1333 | 1 | 0.79934  | 0.004373 |
| 107.2    | 1 | 0.865361 | 0.663175 |
| NA       | 0 | NA       | NA       |
| 98.06667 | 1 | 1.039769 | 0.769659 |
| 104.4333 | 1 | 0.914778 | 0.496924 |
| 90.03333 | 1 | 1.22177  | 0.170556 |
| 92.46667 | 1 | 1.162581 | 0.47977  |
| 112.9    | 1 | 0.771184 | 0.448154 |
| 81.3     | 1 | 1.460025 | 0.303165 |
| NA       | 0 | NA       | NA       |
| 90.76667 | 1 | 1.203085 | 0.367953 |
| 91.33333 | 1 | 1.189416 | 0.654224 |



|          |   |          |          |
|----------|---|----------|----------|
| 105.9667 | 1 | 0.887386 | 0.489361 |
| NA       | 0 | NA       | NA       |
| 109.8333 | 1 | 0.821244 | 0.52527  |
| 99.03333 | 1 | 1.019522 | 0.956741 |
| 95.93333 | 1 | 1.084781 | 0.432038 |
| NA       | 0 | NA       | NA       |
| 96.13333 | 1 | 1.080444 | 0.52343  |
| NA       | 0 | NA       | NA       |
| 90       | 1 | 1.221852 | 0.07005  |
| 76.23333 | 1 | 1.623524 | 0.253419 |
| 107.8    | 1 | 0.855288 | 0.296906 |
| 96.36667 | 1 | 1.075752 | 0.652356 |
| 92.4     | 1 | 1.164502 | 0.313051 |
| 91.1     | 1 | 1.19539  | 0.669119 |
| 100.6667 | 1 | 0.986755 | 0.89613  |
| 91.63333 | 1 | 1.182612 | 0.510514 |
| NA       | 0 | NA       | NA       |
| 112.2333 | 1 | 0.782002 | 0.538425 |
| 94.2     | 1 | 1.123142 | 0.293113 |
| 101.4333 | 1 | 0.971738 | 0.812333 |
| NA       | 0 | NA       | NA       |
| NA       | 0 | NA       | NA       |
| 103.5667 | 1 | 0.930801 | 0.467318 |
| 90.76667 | 1 | 1.203819 | 0.213148 |
| 108.3333 | 1 | 0.845846 | 0.188118 |
| 108.2    | 1 | 0.848737 | 0.175107 |
| 90.46667 | 1 | 1.211127 | 0.102492 |
| 92.96667 | 1 | 1.15095  | 0.006328 |
| 107.6667 | 1 | 0.857895 | 0.498102 |
| 91.5     | 1 | 1.185428 | 0.33668  |
| NA       | 0 | NA       | NA       |
| 98.3     | 1 | 1.034588 | 0.737114 |
| 98.26667 | 1 | 1.035278 | 0.856963 |
| 107      | 1 | 0.868847 | 0.032187 |
| 105.4    | 1 | 0.897849 | 0.629095 |
| 114.1667 | 1 | 0.751825 | 0.074748 |
| NA       | 0 | NA       | NA       |
| 102.7667 | 1 | 0.945832 | 0.457597 |
| 88.76667 | 1 | 1.253098 | 0.391816 |
| 87       | 1 | 1.298851 | 0.265916 |
| 66.83333 | 1 | 1.99202  | 0.141157 |
| NA       | 0 | NA       | NA       |
| 94.3     | 1 | 1.121244 | 0.340574 |
| 89.46667 | 1 | 1.235469 | 0.348072 |
| NA       | 0 | NA       | NA       |
| 98.83333 | 1 | 1.022934 | 0.881216 |
| 97.3     | 1 | 1.055498 | 0.627259 |
| 89.9     | 1 | 1.224694 | 0.104503 |
| 93.26667 | 1 | 1.143674 | 0.368063 |
| 122.1333 | 1 | 0.637555 | 0.430155 |
| 100.6667 | 1 | 0.986755 | 0.965083 |

|          |            |          |
|----------|------------|----------|
| NA       | 0 NA       | NA       |
| 94.9     | 1 1.107833 | 0.146569 |
| NA       | 0 NA       | NA       |
| 94.16667 | 1 1.124248 | 0.501386 |
| 101.7667 | 1 0.964953 | 0.692802 |
| NA       | 0 NA       | NA       |
| 95.33333 | 1 1.097902 | 0.541968 |
| 92.1     | 1 1.171553 | 0.47861  |
| 104      | 1 0.923077 | 0.390539 |
| 93.46667 | 1 1.139444 | 0.482341 |
| NA       | 0 NA       | NA       |
| NA       | 0 NA       | NA       |
| 101.0667 | 1 0.979222 | 0.816693 |
| 98.96667 | 1 1.020546 | 0.913966 |
| 95.93333 | 1 1.084781 | 0.451989 |
| NA       | 0 NA       | NA       |
| 90       | 1 1.222222 | 0.012401 |
| NA       | 0 NA       | NA       |
| 98.73333 | 1 1.025658 | 0.636824 |
| 104.6    | 1 0.911409 | 0.129062 |
| 96.83333 | 1 1.065749 | 0.726276 |
| NA       | 0 NA       | NA       |
| 100.7    | 1 0.986097 | 0.884917 |
| 94.36667 | 1 1.119746 | 0.531645 |
| NA       | 0 NA       | NA       |
| 89.3     | 1 1.239642 | 0.299879 |
| 94.9     | 1 1.107482 | 0.183458 |
| 110.4667 | 1 0.810501 | 0.533387 |
| 87.76667 | 1 1.278769 | 0.366501 |
| NA       | 0 NA       | NA       |
| 87.63333 | 1 1.282237 | 0.198001 |
| 74       | 1 1.702703 | 0.263197 |
| 92.66667 | 1 1.158633 | 0.218034 |
| NA       | 0 NA       | NA       |
| 82.96667 | 1 1.410607 | 0.514705 |
| 89.86667 | 1 1.22589  | 0.216163 |
| NA       | 0 NA       | NA       |
| NA       | 0 NA       | NA       |
| NA       | 0 NA       | NA       |
| 92.86667 | 1 1.153625 | 0.545895 |
| 108.4    | 1 0.845018 | 0.148014 |
| 96.46667 | 1 1.073255 | 0.504167 |
| 90.23333 | 1 1.216476 | 0.293107 |
| 124.4333 | 1 0.607286 | 0.150767 |
| 108.4667 | 1 0.843884 | 0.640182 |
| 94.96667 | 1 1.106353 | 0.352069 |
| 87.13333 | 1 1.295333 | 0.495536 |
| 103.4    | 1 0.934236 | 0.289182 |
| 109.2    | 1 0.831502 | 0.205621 |
| 103.9667 | 1 0.923373 | 0.84151  |
| 94.63333 | 1 1.113068 | 0.525784 |

|          |   |          |          |
|----------|---|----------|----------|
| 102.4    | 1 | 0.953125 | 0.766957 |
| 85.43333 | 1 | 1.341007 | 0.573358 |
| 92.6     | 1 | 1.159827 | 0.108813 |
| 97.33333 | 1 | 1.054795 | 0.46622  |
| 96.3     | 1 | 1.077189 | 0.73316  |
| NA       | 0 | NA       | NA       |
| 91.1     | 1 | 1.195024 | 0.456253 |
| 92.8     | 1 | 1.154813 | 0.334633 |
| 114.0333 | 1 | 0.753873 | 0.548596 |
| 118.1667 | 1 | 0.692525 | 0.460032 |
| NA       | 0 | NA       | NA       |
| NA       | 0 | NA       | NA       |
| NA       | 0 | NA       | NA       |
| NA       | 0 | NA       | NA       |
| NA       | 0 | NA       | NA       |
| 108.8333 | 1 | 0.837366 | 0.028149 |
| 85.9     | 1 | 1.328289 | 0.12522  |
| NA       | 0 | NA       | NA       |
| 133.3667 | 1 | 0.499375 | 0.323685 |
| 106.4333 | 1 | 0.879424 | 0.111484 |
| 94.36667 | 1 | 1.119392 | 0.331259 |
| 100      | 1 | 1        | 1        |
| 88.83333 | 1 | 1.251407 | 0.423311 |
| NA       | 0 | NA       | NA       |
| 100.4333 | 1 | 0.991703 | 0.896032 |
| 92.06667 | 1 | 1.172339 | 0.543833 |
| 91.96667 | 1 | 1.175063 | 0.710573 |
| 97.46667 | 1 | 1.051642 | 0.821322 |
| NA       | 0 | NA       | NA       |
| 88.36667 | 1 | 1.263674 | 0.395771 |
| 90.36667 | 1 | 1.212837 | 0.3914   |
| NA       | 0 | NA       | NA       |
| 94.9     | 1 | 1.107482 | 0.663492 |
| 106.8667 | 1 | 0.871491 | 0.352753 |
| 130.3333 | 1 | 0.534527 | 0.044977 |
| 92.86667 | 1 | 1.152907 | 0.501584 |
| 94.76667 | 1 | 1.110447 | 0.758347 |
| NA       | 0 | NA       | NA       |
| 53.6     | 1 | 2.731343 | 0.277961 |
| NA       | 0 | NA       | NA       |
| 91.66667 | 1 | 1.181455 | 0.466739 |
| 88.36667 | 1 | 1.263674 | 0.049381 |
| 101.4667 | 1 | 0.971091 | 0.806568 |
| 89.13333 | 1 | 1.243829 | 0.397877 |
| 100.9    | 1 | 0.982491 | 0.887261 |
| 106.6333 | 1 | 0.875899 | 0.493198 |
| NA       | 0 | NA       | NA       |
| NA       | 0 | NA       | NA       |
| NA       | 0 | NA       | NA       |
| 100.3    | 1 | 0.99435  | 0.932786 |
| NA       | 0 | NA       | NA       |

|          |            |          |
|----------|------------|----------|
| NA       | 0 NA       | NA       |
| 112.7667 | 1 0.773574 | 0.396979 |
| 100.8667 | 1 0.982816 | 0.885994 |
| 82.7     | 1 1.417977 | 0.169679 |
| 84.96667 | 1 1.353864 | 0.26445  |
| 94.33333 | 1 1.120141 | 0.658522 |
| NA       | 0 NA       | NA       |
| 100.0667 | 1 0.998334 | 0.987857 |
| 103.3667 | 1 0.934537 | 0.561685 |
| 85.6     | 1 1.336449 | 0.100665 |
| 106.5333 | 1 0.877347 | 0.332635 |
| 75.76667 | 1 1.639683 | 0.492705 |
| 112.2    | 1 0.782531 | 0.296595 |
| 104.3333 | 1 0.916933 | 0.343223 |
| NA       | 0 NA       | NA       |
| 100.9667 | 1 0.980852 | 0.874951 |
| 81.46667 | 1 1.454992 | 0.189663 |
| 61.9     | 1 2.231018 | 0.364378 |
| 90.2     | 1 1.217295 | 0.359154 |
| 95.9     | 1 1.085506 | 0.753075 |
| 107.9667 | 1 0.852732 | 0.52239  |
| NA       | 0 NA       | NA       |
| NA       | 0 NA       | NA       |
| NA       | 0 NA       | NA       |
| 103.6333 | 1 0.929881 | 0.78621  |
| NA       | 0 NA       | NA       |
| 94.73333 | 1 1.110837 | 0.119981 |
| NA       | 0 NA       | NA       |
| 97.76667 | 1 1.045687 | 0.895182 |
| NA       | 0 NA       | NA       |
| NA       | 0 NA       | NA       |
| 100.9667 | 1 0.981182 | 0.940784 |
| 104.8    | 1 0.907761 | 0.367015 |
| 89.06667 | 1 1.245509 | 0.460849 |
| 100.7    | 1 0.985766 | 0.851695 |
| NA       | 0 NA       | NA       |
| 127.5667 | 1 0.567808 | 0.02643  |
| NA       | 0 NA       | NA       |
| 85.23333 | 1 1.346109 | 0.175581 |
| 90.36667 | 1 1.212837 | 0.080986 |
| 102.1333 | 1 0.958225 | 0.824785 |
| NA       | 0 NA       | NA       |
| 106.8333 | 1 0.872075 | 0.254222 |
| NA       | 0 NA       | NA       |
| NA       | 0 NA       | NA       |
| 85.56667 | 1 1.337359 | 0.17157  |
| 95.83333 | 1 1.086957 | 0.52248  |
| NA       | 0 NA       | NA       |
| 97.96667 | 1 1.041851 | 0.620341 |
| 90.83333 | 1 1.202202 | 0.460345 |
| 100.4    | 1 0.992032 | 0.95679  |

|          |            |          |
|----------|------------|----------|
| NA       | 0 NA       | NA       |
| 105.2667 | 1 0.899937 | 0.112316 |
| 99.03333 | 1 1.019859 | 0.812777 |
| 100.3    | 1 0.994018 | 0.961545 |
| 89.23333 | 1 1.240941 | 0.194784 |
| 134.1667 | 1 0.490932 | 0.433588 |
| 87.8     | 1 1.277525 | 0.60001  |
| 97.93333 | 1 1.041865 | 0.79527  |
| NA       | 0 NA       | NA       |
| NA       | 0 NA       | NA       |
| 99.66667 | 1 1.006355 | 0.958197 |
| 106.8    | 1 0.872971 | 0.318948 |
| 103.2333 | 1 0.937359 | 0.661037 |
| 95.6     | 1 1.09205  | 0.186591 |
| NA       | 0 NA       | NA       |
| 86.36667 | 1 1.315708 | 0.283418 |
| 93.5     | 1 1.139394 | 0.53885  |
| NA       | 0 NA       | NA       |
| NA       | 0 NA       | NA       |
| NA       | 0 NA       | NA       |
| 103.4    | 1 0.933914 | 0.581368 |
| 101.1667 | 1 0.976936 | 0.742316 |
| 84.76667 | 1 1.359811 | 0.22566  |
| 104.3333 | 1 0.916933 | 0.648584 |
| 88.26667 | 1 1.265861 | 0.39709  |
| 90.13333 | 1 1.218935 | 0.680045 |
| NA       | 0 NA       | NA       |
| NA       | 0 NA       | NA       |
| 100.1    | 1 0.998002 | 0.992469 |
| NA       | 0 NA       | NA       |
| NA       | 0 NA       | NA       |
| 102.8667 | 1 0.94394  | 0.607552 |
| 92.16667 | 1 1.169982 | 0.314295 |
| 103.9333 | 1 0.92399  | 0.238849 |
| NA       | 0 NA       | NA       |
| 92.16667 | 1 1.169982 | 0.395235 |
| NA       | 0 NA       | NA       |
| 100.8667 | 1 0.983146 | 0.873881 |
| 93.86667 | 1 1.130327 | 0.241654 |
| NA       | 0 NA       | NA       |
| NA       | 0 NA       | NA       |
| 105.5333 | 1 0.895452 | 0.099786 |
| 109.2667 | 1 0.830384 | 0.353324 |
| 88.83333 | 1 1.251032 | 0.379598 |
| 111.5    | 1 0.794021 | 0.044615 |
| 105.2    | 1 0.901141 | 0.514172 |
| 101.4    | 1 0.972058 | 0.878891 |
| 109.7    | 1 0.823154 | 0.108392 |
| 95.96667 | 1 1.084404 | 0.237406 |
| 96.23333 | 1 1.078282 | 0.644273 |
| 95.96667 | 1 1.084057 | 0.765006 |

|          |          |          |          |
|----------|----------|----------|----------|
| 91.23333 | 1        | 1.192181 | 0.273926 |
| 102.9333 | 1        | 0.942681 | 0.004662 |
| 53.46667 | 1        | 2.741272 | 0.317273 |
| 96.56667 | 1        | 1.070763 | 0.700374 |
| NA       | 0        | NA       | NA       |
| NA       | 0        | NA       | NA       |
| 93.63333 | 1        | 1.135991 | 0.697164 |
| 112.4    | 1        | 0.779359 | 0.135862 |
| 93.43333 | 1        | 1.14092  | 0.489569 |
| NA       | 0        | NA       | NA       |
| NA       | 0        | NA       | NA       |
| 99.43333 | 1        | 1.011398 | 0.952265 |
| 105.9667 | 1        | 0.887701 | 0.398836 |
| 107.4333 | 1        | 0.86193  | 0.114042 |
| 183.2    | 0.333333 | 1.137828 | NA       |
| NA       | 0        | NA       | NA       |
| NA       | 0        | NA       | NA       |
| NA       | 0        | NA       | NA       |
| 116.7333 | 1        | 0.713307 | 0.028045 |
| NA       | 0        | NA       | NA       |
| NA       | 0        | NA       | NA       |
| 85.96667 | 1        | 1.326483 | 0.47517  |
| 68.96667 | 1        | 1.899468 | 0.333182 |
| 123.9667 | 1        | 0.613337 | 0.624402 |
| NA       | 0        | NA       | NA       |
| NA       | 0        | NA       | NA       |
| 98.86667 | 1        | 1.022589 | 0.873646 |
| 100.9333 | 1        | 0.981176 | 0.954139 |
| NA       | 0        | NA       | NA       |
| NA       | 0        | NA       | NA       |
| NA       | 0        | NA       | NA       |
| NA       | 0        | NA       | NA       |
| 126.0667 | 1        | 0.586727 | 0.251688 |
| NA       | 0        | NA       | NA       |
| 105.0667 | 1        | 0.903553 | 0.380037 |
| 98.4     | 1        | 1.032859 | 0.70877  |
| NA       | 0        | NA       | NA       |
| 104.0667 | 1        | 0.922486 | 0.366609 |
| 87.43333 | 1        | 1.287457 | 0.084167 |
| 108.7333 | 1        | 0.839362 | 0.225126 |
| 92.7     | 1        | 1.157138 | 0.326923 |
| 99.7     | 1        | 1.006018 | 0.967813 |
| 107.0667 | 1        | 0.867995 | 0.198536 |
| 96.46667 | 1        | 1.073255 | 0.754193 |
| 75.8     | 1        | 1.638522 | 0.458505 |
| NA       | 0        | NA       | NA       |
| 104.1    | 1        | 0.920909 | 0.60101  |
| 97.96667 | 1        | 1.041511 | 0.426624 |
| 91.03333 | 1        | 1.196631 | 0.440356 |
| 91.06667 | 1        | 1.196193 | 0.220702 |
| 79.86667 | 1        | 1.504174 | 0.476174 |

|          |   |          |          |
|----------|---|----------|----------|
| 100.9    | 1 | 0.982161 | 0.866279 |
| 98.4     | 1 | 1.032182 | 0.869782 |
| 85.9     | 1 | 1.327901 | 0.299553 |
| 125.9333 | 1 | 0.588142 | 0.116469 |
| 97       | 1 | 1.061856 | 0.766532 |
| 98.56667 | 1 | 1.029084 | 0.626028 |
| NA       | 0 | NA       | NA       |
| 91.86667 | 1 | 1.176705 | 0.125642 |
| NA       | 0 | NA       | NA       |
| NA       | 0 | NA       | NA       |
| 92.83333 | 1 | 1.154758 | 0.139631 |
| NA       | 0 | NA       | NA       |
| NA       | 0 | NA       | NA       |
| NA       | 0 | NA       | NA       |
| NA       | 0 | NA       | NA       |
| NA       | 0 | NA       | NA       |
| 106.6667 | 1 | 0.875    | 0.630565 |
| NA       | 0 | NA       | NA       |

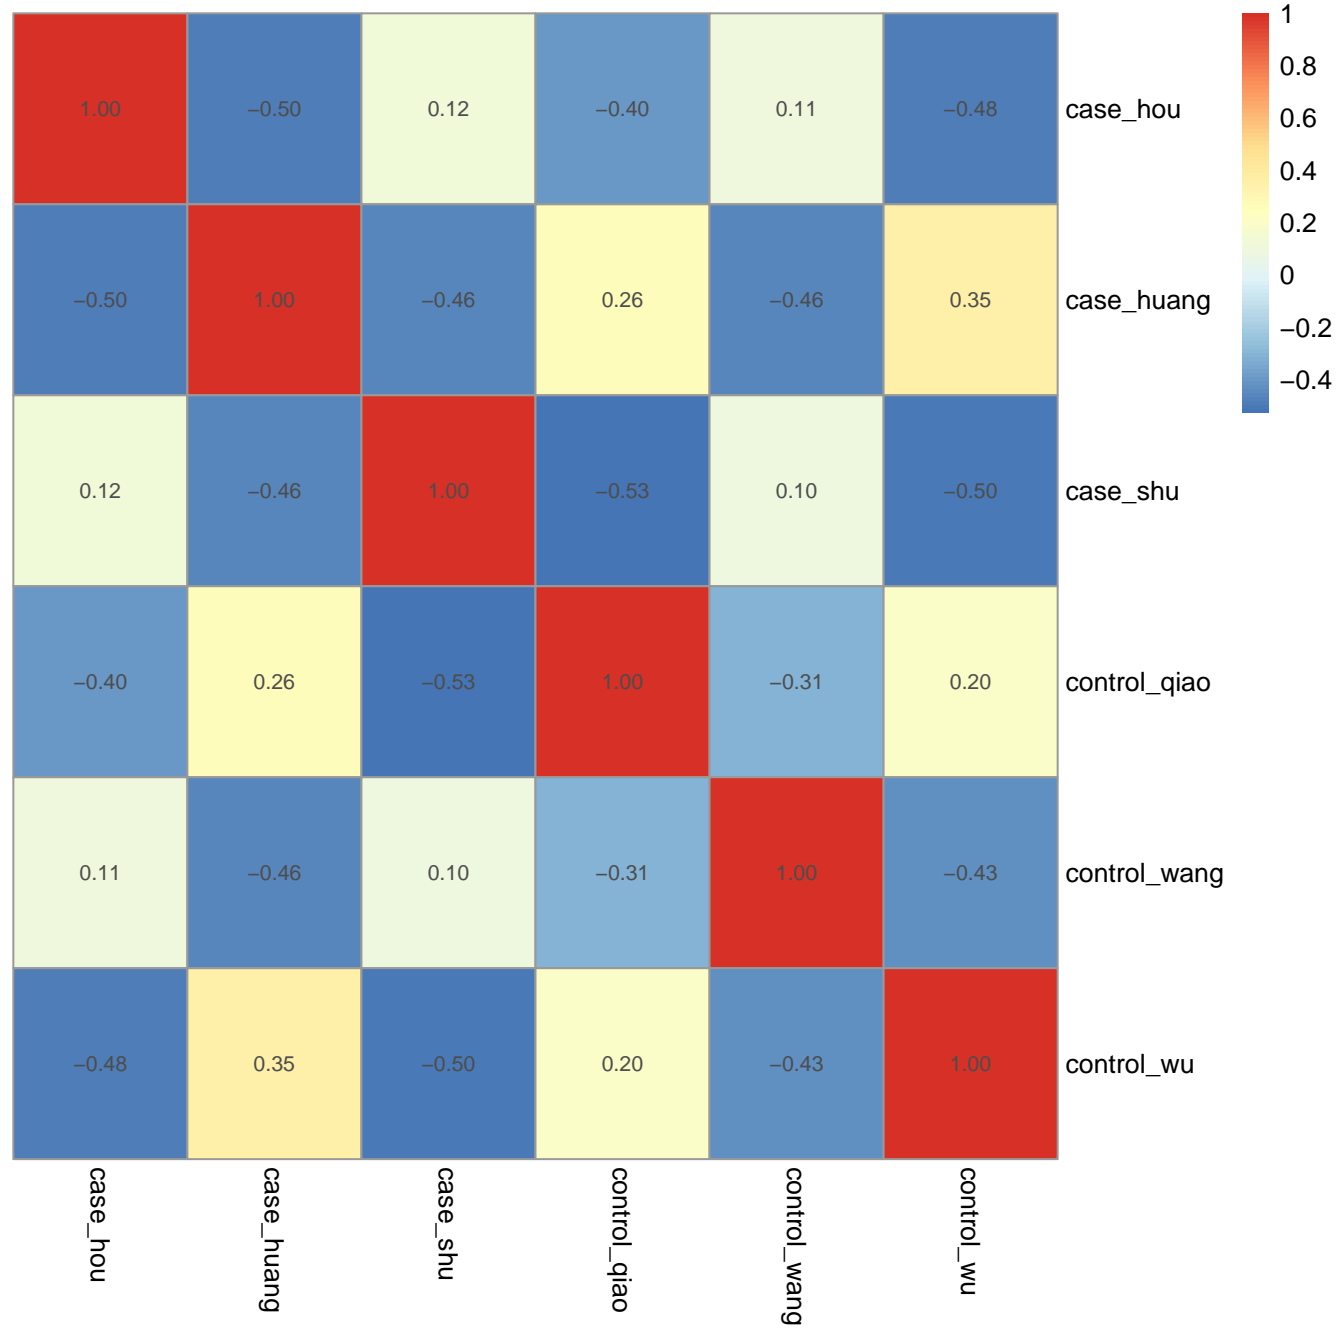



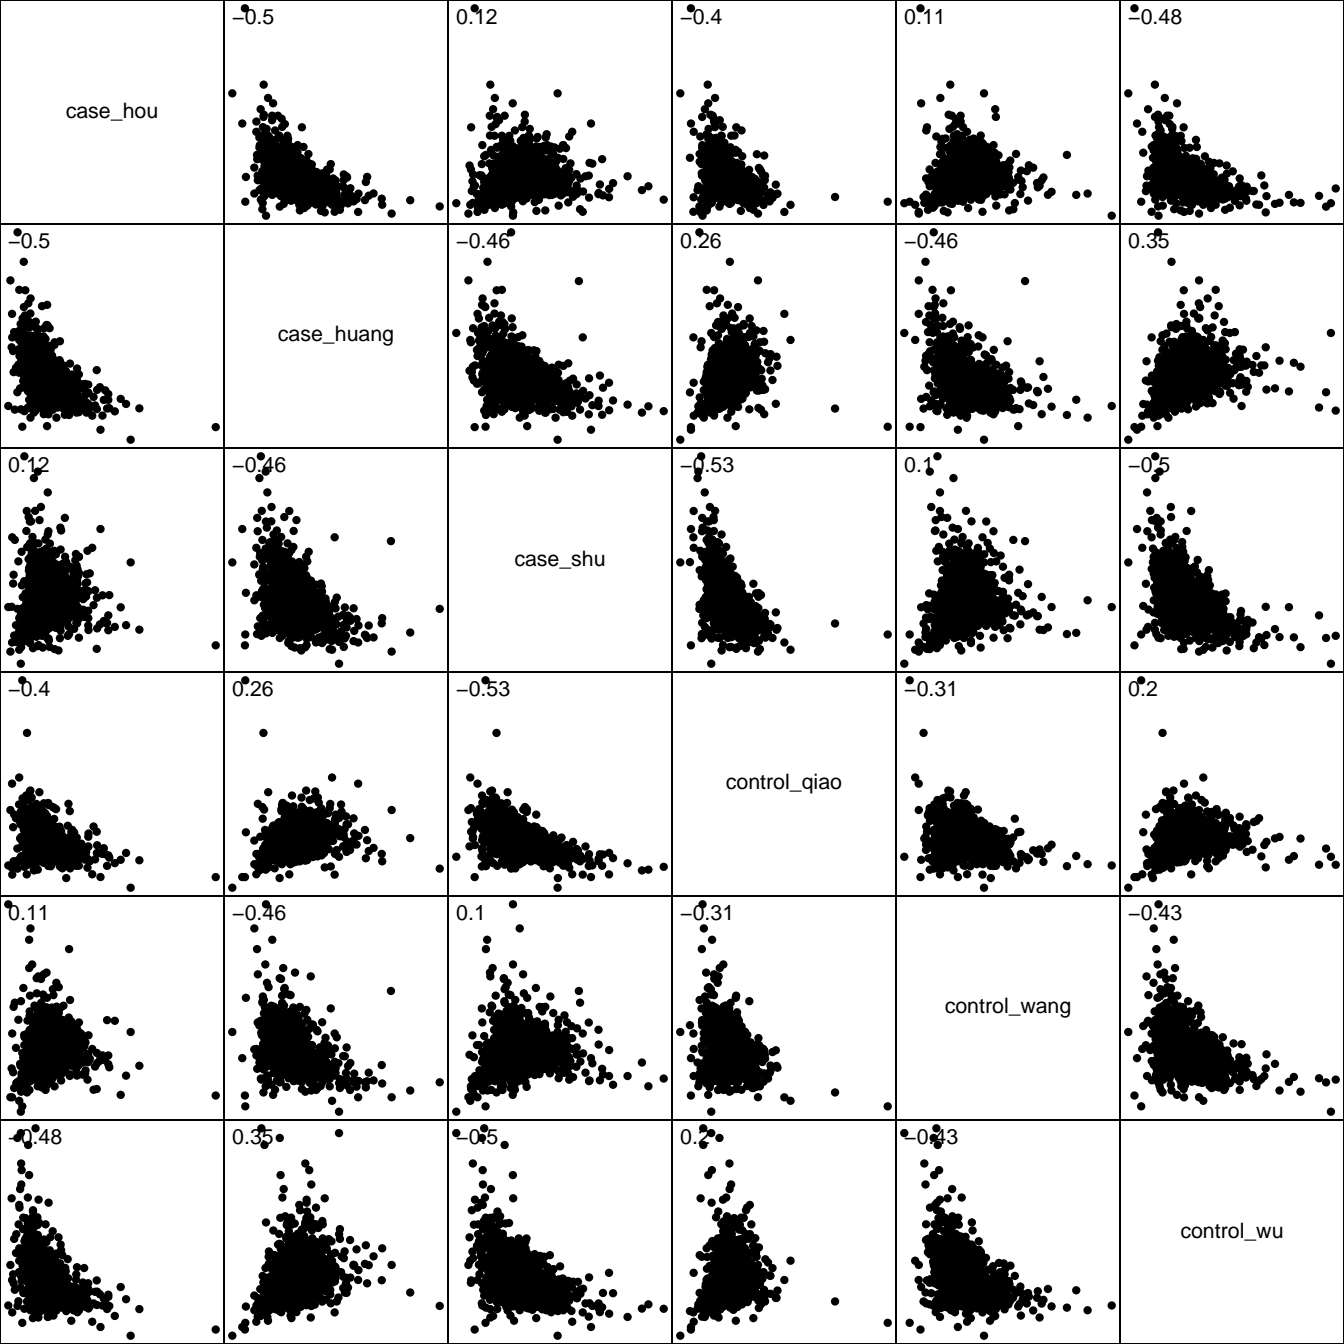

# Molecular Weight Distribution

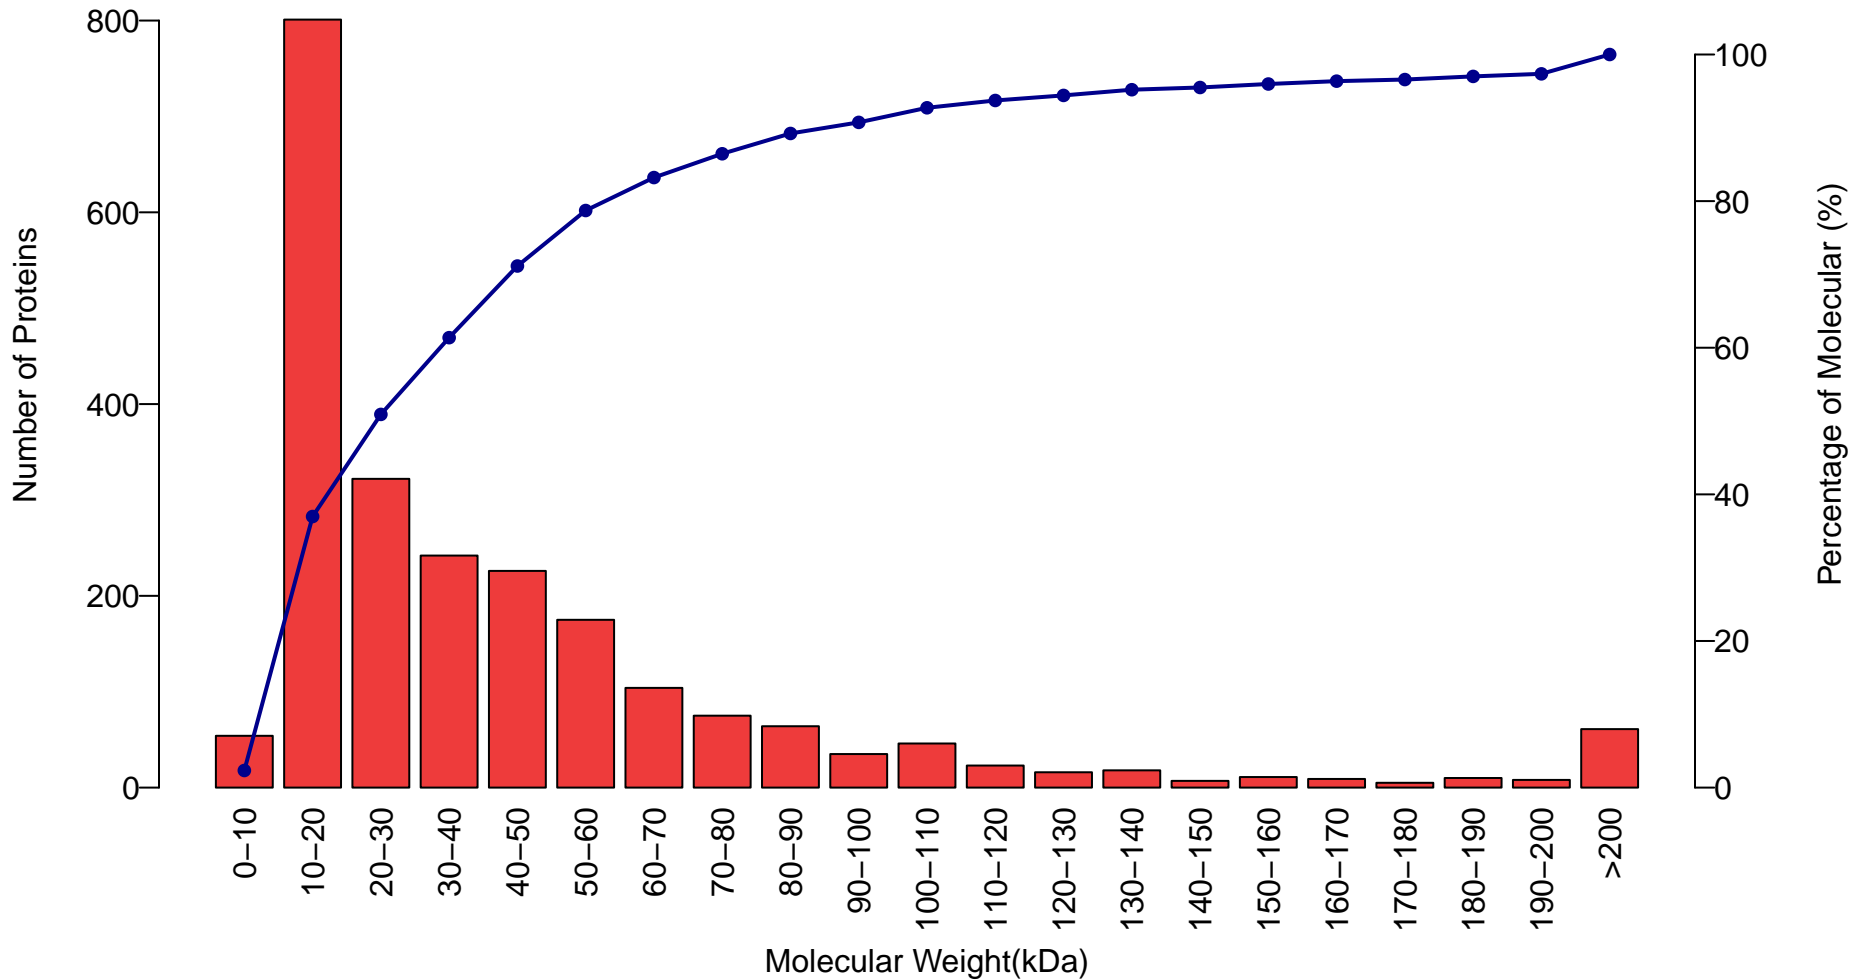

# Peptide Count Distribution

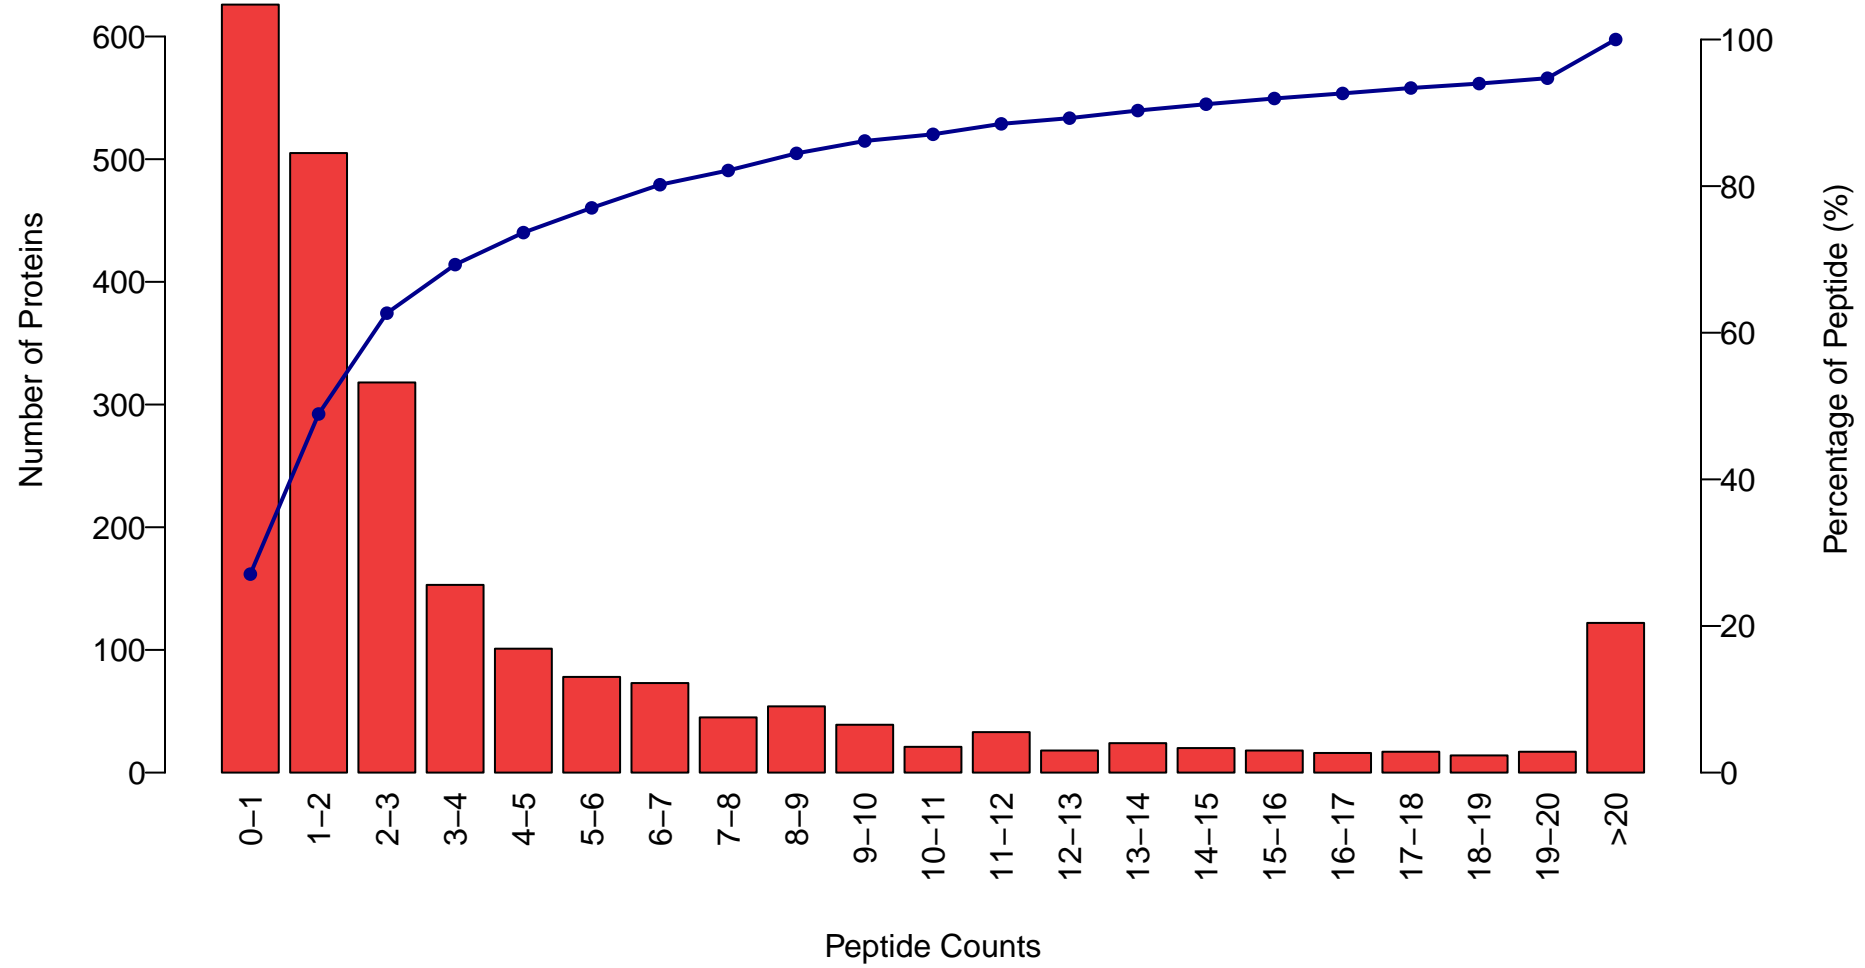

# Peptide Length Distribution

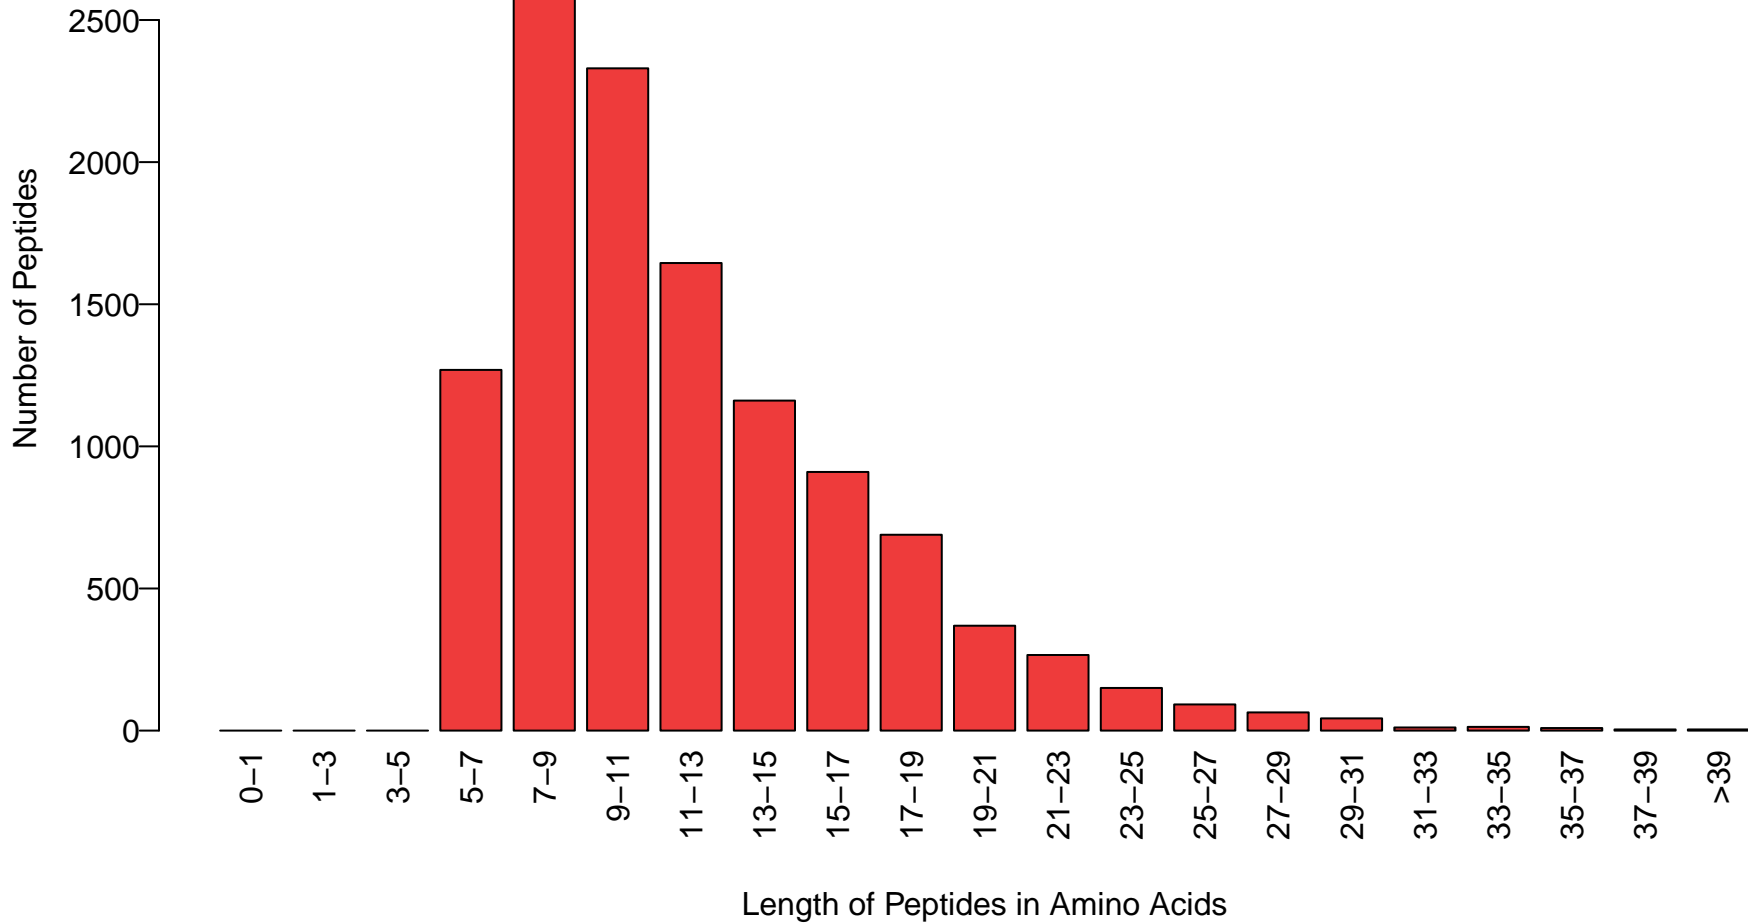

# Protein Sequence Coverage Distribution

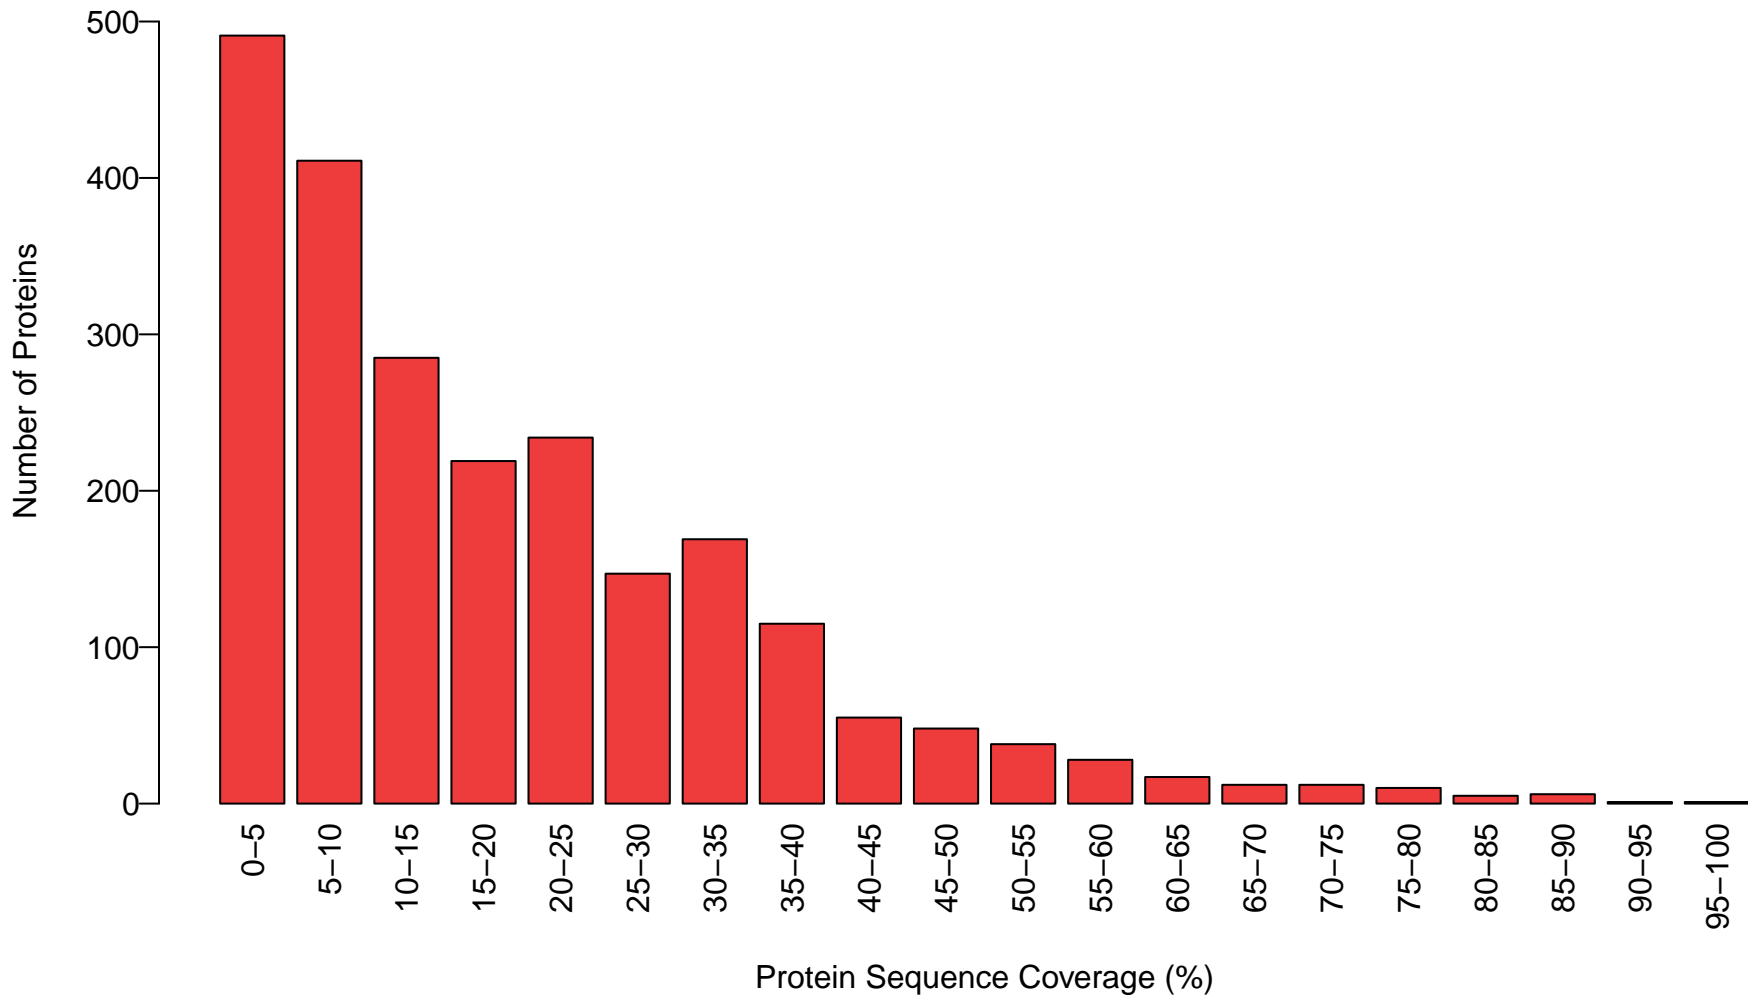

# Supplemental material3

*We used EBI database to do GO/KEGG annotations, TermFinder to do GO enrichment of functional terms and R code to do KEGG enrichment of functional terms.*

| GO_ID     | class    | term      | number | protein   | label | number | protein   | label |
|-----------|----------|-----------|--------|-----------|-------|--------|-----------|-------|
| GO:000000 | biologic | reproduct | 1      | P54851    | up    | 1      | P35527    | down  |
| GO:00019C | biologic | cell kill | 1      | P54851    | up    | 0      | -         | down  |
| GO:000237 | biologic | immune sy | 11     | A0A5C2FYV | up    | 4      | A0A5C2GMH | down  |
| GO:000382 | molecul  | catalytic | 9      | P05496;AC | up    | 10     | A0A172Q3A | down  |
| GO:000519 | molecul  | structura | 0      | -         | up    | 7      | Q9NR99;Q1 | down  |
| GO:000521 | molecul  | transport | 3      | P05496;Q9 | up    | 2      | E9M263;B7 | down  |
| GO:000548 | molecul  | binding   | 22     | P05496;Q6 | up    | 24     | P60827;G3 | down  |
| GO:000562 | cellular | intracell | 11     | P05496;P5 | up    | 17     | D6RFN0;Q1 | down  |
| GO:000562 | cellular | cell      | 2      | Q9HBA0;P5 | up    | 0      | -         | down  |
| GO:000815 | biologic | metabolic | 8      | P05496;AC | up    | 12     | A0A172Q3A | down  |
| GO:000828 | biologic | cell popu | 2      | P54851;A4 | up    | 1      | P35908    | down  |
| GO:000998 | biologic | cellular  | 20     | P05496;AC | up    | 21     | G3V357;Q1 | down  |
| GO:002241 | biologic | reproduct | 1      | P54851    | up    | 1      | P35527    | down  |
| GO:002261 | biologic | biologica | 2      | P54851;QC | up    | 1      | Q14324    | down  |
| GO:002305 | biologic | signaling | 10     | A0A5C2FYV | up    | 4      | A0A5C2GMH | down  |
| GO:00325C | biologic | multicell | 3      | P54851;Q9 | up    | 11     | Q14324;Q9 | down  |
| GO:00325C | biologic | developme | 2      | P54851;Q9 | up    | 8      | Q9NQ79;P3 | down  |
| GO:003299 | cellular | protein-c | 9      | P05496;AC | up    | 11     | D6RFN0;P6 | down  |
| GO:003802 | molecul  | cargo rec | 0      | -         | up    | 1      | P58215    | down  |
| GO:004001 | biologic | locomotic | 9      | A0A5C2FYV | up    | 3      | A0A5C2GMH | down  |
| GO:005089 | biologic | response  | 14     | A0A5C2FYV | up    | 10     | Q9NR99;AC | down  |
| GO:005117 | biologic | localizat | 13     | P05496;AC | up    | 9      | A0A5C2GMH | down  |
| GO:00517C | biologic | multi-org | 6      | P54851;QC | up    | 3      | A0A5C2GMH | down  |
| GO:006008 | molecul  | molecul   | 2      | Q08722;Q9 | up    | 0      | -         | down  |
| GO:00650C | biologic | biologica | 16     | A0A5C2FYV | up    | 16     | P60827;Q6 | down  |
| GO:007184 | biologic | cellular  | 9      | P05496;P5 | up    | 9      | A0A5C2GMH | down  |
| GO:009877 | molecul  | molecul   | 1      | 000487    | up    | 0      | -         | down  |
| GO:011016 | cellular | cellular  | 19     | P05496;AC | up    | 29     | D6RFN0;P6 | down  |
| GO:014011 | molecul  | transcrip | 0      | -         | up    | 3      | B4E3L5;Q8 | down  |
| GO:014029 | molecul  | small mol | 1      | Q9HBA0    | up    | 0      | -         | down  |

| GO-ID     | description | ontology | Input | numInput | allBackgroun | Backgroun | P-Value  | Corrected |
|-----------|-------------|----------|-------|----------|--------------|-----------|----------|-----------|
| GO:000588 | intermediC  |          | 5     | 63       | 15           | 2002      | 6.20E-05 | 0.023572  |
| GO:007026 | cornificaP  |          | 4     | 63       | 9            | 2002      | 9.98E-05 | 0.023572  |
| GO:007025 | actin-medP  |          | 5     | 63       | 17           | 2002      | 0.000122 | 0.023572  |
| GO:003142 | keratinizP  |          | 4     | 63       | 10           | 2002      | 0.000162 | 0.023572  |
| GO:003004 | actin filP  |          | 5     | 63       | 19           | 2002      | 0.000218 | 0.023572  |
| GO:004511 | intermediC  |          | 5     | 63       | 19           | 2002      | 0.000218 | 0.023572  |
| GO:003021 | keratinocP  |          | 4     | 63       | 11           | 2002      | 0.000249 | 0.023572  |
| GO:000991 | epidermalP  |          | 4     | 63       | 13           | 2002      | 0.000515 | 0.040864  |
| GO:000551 | calmoduliF  |          | 3     | 63       | 6            | 2002      | 0.000556 | 0.040864  |
| GO:003004 | muscle fiP  |          | 4     | 63       | 15           | 2002      | 0.000937 | 0.044286  |
| GO:003327 | actin-myoP  |          | 4     | 63       | 15           | 2002      | 0.000937 | 0.044286  |
| GO:004509 | keratin fC  |          | 3     | 63       | 7            | 2002      | 0.00095  | 0.044286  |
| GO:003028 | structuraF  |          | 2     | 63       | 2            | 2002      | 0.000975 | 0.044286  |
| GO:009908 | supramoleC  |          | 10    | 63       | 102          | 2002      | 0.001003 | 0.044286  |
| GO:009951 | supramoleC  |          | 10    | 63       | 102          | 2002      | 0.001003 | 0.044286  |
| GO:00037C | DNA-bindiF  |          | 3     | 63       | 10           | 2002      | 0.003045 | 0.119887  |
| GO:009908 | supramoleC  |          | 10    | 63       | 118          | 2002      | 0.003079 | 0.119887  |
| GO:000854 | epidermisP  |          | 4     | 63       | 21           | 2002      | 0.003565 | 0.13113   |
| GO:004358 | skin deveP  |          | 4     | 63       | 22           | 2002      | 0.004256 | 0.148287  |
| GO:00451C | intermediP  |          | 2     | 63       | 4            | 2002      | 0.005615 | 0.16896   |
| GO:004568 | positive P  |          | 2     | 63       | 4            | 2002      | 0.005615 | 0.16896   |
| GO:000153 | cornifiedC  |          | 2     | 63       | 4            | 2002      | 0.005615 | 0.16896   |
| GO:004589 | negative P  |          | 5     | 63       | 39           | 2002      | 0.006628 | 0.190779  |
| GO:19035C | negative P  |          | 5     | 63       | 40           | 2002      | 0.007394 | 0.202327  |
| GO:190267 | negative P  |          | 5     | 63       | 41           | 2002      | 0.00822  | 0.202327  |
| GO:005125 | negative P  |          | 5     | 63       | 42           | 2002      | 0.009108 | 0.202327  |
| GO:200104 | positive P  |          | 2     | 63       | 5            | 2002      | 0.009169 | 0.202327  |
| GO:000586 | troponin C  |          | 2     | 63       | 5            | 2002      | 0.009169 | 0.202327  |
| GO:003298 | myosin fiC  |          | 2     | 63       | 5            | 2002      | 0.009169 | 0.202327  |
| GO:001683 | carboxy-lF  |          | 2     | 63       | 5            | 2002      | 0.009169 | 0.202327  |
| GO:009951 | polymericC  |          | 6     | 63       | 61           | 2002      | 0.010938 | 0.228739  |
| GO:003002 | actin filP  |          | 7     | 63       | 80           | 2002      | 0.011318 | 0.228739  |
| GO:004593 | negative P  |          | 5     | 63       | 45           | 2002      | 0.012167 | 0.228739  |
| GO:004542 | regulatioP  |          | 2     | 63       | 6            | 2002      | 0.013476 | 0.228739  |
| GO:004568 | regulatioP  |          | 2     | 63       | 6            | 2002      | 0.013476 | 0.228739  |
| GO:005149 | regulatioP  |          | 2     | 63       | 6            | 2002      | 0.013476 | 0.228739  |
| GO:011002 | regulatioP  |          | 2     | 63       | 6            | 2002      | 0.013476 | 0.228739  |
| GO:200104 | regulatioP  |          | 2     | 63       | 6            | 2002      | 0.013476 | 0.228739  |
| GO:000418 | metallocaF  |          | 2     | 63       | 6            | 2002      | 0.013476 | 0.228739  |
| GO:000693 | muscle coP  |          | 4     | 63       | 33           | 2002      | 0.018378 | 0.269185  |
| GO:00030C | skeletal P  |          | 2     | 63       | 7            | 2002      | 0.018486 | 0.269185  |
| GO:003223 | regulatioP  |          | 2     | 63       | 7            | 2002      | 0.018486 | 0.269185  |
| GO:003267 | regulatioP  |          | 2     | 63       | 7            | 2002      | 0.018486 | 0.269185  |
| GO:00451C | intermediP  |          | 2     | 63       | 7            | 2002      | 0.018486 | 0.269185  |
| GO:00451C | intermediP  |          | 2     | 63       | 7            | 2002      | 0.018486 | 0.269185  |
| GO:200011 | negative P  |          | 5     | 63       | 50           | 2002      | 0.018705 | 0.269185  |
| GO:009743 | supramoleP  |          | 7     | 63       | 90           | 2002      | 0.020783 | 0.292727  |
| GO:000301 | muscle syP  |          | 4     | 63       | 35           | 2002      | 0.022441 | 0.296085  |
| GO:004687 | metal ionF  |          | 19    | 63       | 384          | 2002      | 0.022517 | 0.296085  |
| GO:000012 | negative P  |          | 3     | 63       | 20           | 2002      | 0.023107 | 0.296085  |



|                     |    |    |     |      |          |          |
|---------------------|----|----|-----|------|----------|----------|
| GO:014011transcripF | 3  | 63 | 20  | 2002 | 0.023107 | 0.296085 |
| GO:005087multicellP | 2  | 63 | 8   | 2002 | 0.024152 | 0.296085 |
| GO:005088musculoskP | 2  | 63 | 8   | 2002 | 0.024152 | 0.296085 |
| GO:001683carbon-caF | 2  | 63 | 8   | 2002 | 0.024152 | 0.296085 |
| GO:001526channel aF | 3  | 63 | 21  | 2002 | 0.026364 | 0.311661 |
| GO:002280passive tF | 3  | 63 | 21  | 2002 | 0.026364 | 0.311661 |
| GO:001055negative P | 5  | 63 | 56  | 2002 | 0.029195 | 0.339069 |
| GO:190342regulatioP | 2  | 63 | 9   | 2002 | 0.03043  | 0.341431 |
| GO:001660nuclear sC | 2  | 63 | 9   | 2002 | 0.03043  | 0.341431 |
| GO:004316cation biF | 19 | 63 | 398 | 2002 | 0.031945 | 0.352465 |
| GO:000821cell deatP | 5  | 63 | 59  | 2002 | 0.035609 | 0.380216 |
| GO:003132negative P | 5  | 63 | 59  | 2002 | 0.035609 | 0.380216 |
| GO:000823metalloexF | 2  | 63 | 10  | 2002 | 0.037276 | 0.390308 |
| GO:003085epitheliaP | 4  | 63 | 41  | 2002 | 0.037734 | 0.390308 |
| GO:000367DNA bindiF | 5  | 63 | 61  | 2002 | 0.040338 | 0.410823 |
| GO:000418carboxypeF | 2  | 63 | 11  | 2002 | 0.04465  | 0.447853 |
| GO:005508transmembP | 6  | 63 | 84  | 2002 | 0.045648 | 0.449037 |
| GO:002289inorganicF | 3  | 63 | 26  | 2002 | 0.046125 | 0.449037 |
| GO:000697cellular P | 3  | 63 | 27  | 2002 | 0.050756 | 0.451474 |
| GO:001063epitheliaP | 2  | 63 | 12  | 2002 | 0.052513 | 0.451474 |
| GO:009013epitheliuP | 2  | 63 | 12  | 2002 | 0.052513 | 0.451474 |
| GO:009752myeloid lP | 2  | 63 | 12  | 2002 | 0.052513 | 0.451474 |
| GO:000586striated C | 2  | 63 | 12  | 2002 | 0.052513 | 0.451474 |
| GO:003637myofilameC | 2  | 63 | 12  | 2002 | 0.052513 | 0.451474 |
| GO:000371transcripF | 2  | 63 | 12  | 2002 | 0.052513 | 0.451474 |
| GO:000526cation chF | 2  | 63 | 12  | 2002 | 0.052513 | 0.451474 |
| GO:001507proton trF | 2  | 63 | 12  | 2002 | 0.052513 | 0.451474 |
| GO:000701cytoskeleP | 7  | 63 | 111 | 2002 | 0.056288 | 0.47062  |
| GO:000989negative P | 5  | 63 | 67  | 2002 | 0.056745 | 0.47062  |
| GO:004316proteasomP | 3  | 63 | 29  | 2002 | 0.06067  | 0.47062  |
| GO:009866inorganicP | 3  | 63 | 29  | 2002 | 0.06067  | 0.47062  |
| GO:006113regulatioP | 2  | 63 | 13  | 2002 | 0.060828 | 0.47062  |
| GO:009013tissue miP | 2  | 63 | 13  | 2002 | 0.060828 | 0.47062  |
| GO:190260proton trP | 2  | 63 | 13  | 2002 | 0.060828 | 0.47062  |
| GO:000905electron F | 2  | 63 | 13  | 2002 | 0.060828 | 0.47062  |
| GO:000550calcium iF | 9  | 63 | 161 | 2002 | 0.061138 | 0.47062  |
| GO:000832cation trF | 3  | 63 | 30  | 2002 | 0.065943 | 0.495858 |
| GO:000195regulatioP | 2  | 63 | 14  | 2002 | 0.069559 | 0.495858 |
| GO:001814peptide cP | 2  | 63 | 14  | 2002 | 0.069559 | 0.495858 |
| GO:002290electron P | 2  | 63 | 14  | 2002 | 0.069559 | 0.495858 |
| GO:005072positive P | 2  | 63 | 14  | 2002 | 0.069559 | 0.495858 |
| GO:190305regulatioP | 2  | 63 | 14  | 2002 | 0.069559 | 0.495858 |
| GO:190290regulatioP | 4  | 63 | 50  | 2002 | 0.06966  | 0.495858 |
| GO:009866inorganicP | 3  | 63 | 31  | 2002 | 0.071422 | 0.498708 |
| GO:000585cytoskeleC | 9  | 63 | 166 | 2002 | 0.071567 | 0.498708 |
| GO:003015regulatioP | 5  | 63 | 73  | 2002 | 0.076521 | 0.50565  |
| GO:001049proteasomP | 3  | 63 | 32  | 2002 | 0.0771   | 0.50565  |
| GO:002240regulatioP | 3  | 63 | 32  | 2002 | 0.0771   | 0.50565  |
| GO:009865cation trP | 3  | 63 | 32  | 2002 | 0.0771   | 0.50565  |
| GO:003001sarcomereC | 3  | 63 | 32  | 2002 | 0.0771   | 0.50565  |
| GO:000694striated P | 2  | 63 | 15  | 2002 | 0.078674 | 0.50565  |

|           |            |    |    |     |      |          |          |
|-----------|------------|----|----|-----|------|----------|----------|
| GO:003042 | growth ccC | 2  | 63 | 15  | 2002 | 0.078674 | 0.50565  |
| GO:004687 | metal ionF | 2  | 63 | 15  | 2002 | 0.078674 | 0.50565  |
| GO:00052C | structuraF | 3  | 63 | 33  | 2002 | 0.082972 | 0.52815  |
| GO:000269 | negative P | 2  | 63 | 16  | 2002 | 0.088139 | 0.545311 |
| GO:000693 | regulatioP | 2  | 63 | 16  | 2002 | 0.088139 | 0.545311 |
| GO:003042 | site of pC | 2  | 63 | 16  | 2002 | 0.088139 | 0.545311 |
| GO:000823 | metallopeF | 3  | 63 | 34  | 2002 | 0.089033 | 0.545738 |
| GO:006042 | epitheliuP | 5  | 63 | 77  | 2002 | 0.091555 | 0.556047 |
| GO:000801 | blood cirP | 3  | 63 | 35  | 2002 | 0.095276 | 0.571875 |
| GO:00516C | proteolysP | 4  | 63 | 56  | 2002 | 0.096776 | 0.571875 |
| GO:00224C | negative P | 2  | 63 | 17  | 2002 | 0.097926 | 0.571875 |
| GO:000301 | circulatoP | 3  | 63 | 36  | 2002 | 0.101695 | 0.571875 |
| GO:00125C | programmeP | 4  | 63 | 57  | 2002 | 0.101721 | 0.571875 |
| GO:00015C | regulatioP | 2  | 63 | 18  | 2002 | 0.108005 | 0.571875 |
| GO:005086 | regulatioP | 2  | 63 | 18  | 2002 | 0.108005 | 0.571875 |
| GO:000022 | nuclear cC | 2  | 63 | 18  | 2002 | 0.108005 | 0.571875 |
| GO:001632 | apical pIC | 2  | 63 | 18  | 2002 | 0.108005 | 0.571875 |
| GO:00166C | nuclear bC | 2  | 63 | 18  | 2002 | 0.108005 | 0.571875 |
| GO:00483C | calcium-dF | 2  | 63 | 18  | 2002 | 0.108005 | 0.571875 |
| GO:003001 | myofibrilC | 3  | 63 | 37  | 2002 | 0.108285 | 0.571875 |
| GO:001531 | inorganicF | 3  | 63 | 37  | 2002 | 0.108285 | 0.571875 |
| GO:002285 | transmembF | 4  | 63 | 59  | 2002 | 0.11196  | 0.571875 |
| GO:00030C | system prP | 6  | 63 | 106 | 2002 | 0.112492 | 0.571875 |
| GO:000692 | movement P | 16 | 63 | 375 | 2002 | 0.114624 | 0.571875 |
| GO:004329 | contractiC | 3  | 63 | 38  | 2002 | 0.115038 | 0.571875 |
| GO:000635 | regulatioP | 7  | 63 | 132 | 2002 | 0.116755 | 0.571875 |
| GO:001062 | negative P | 5  | 63 | 83  | 2002 | 0.116772 | 0.571875 |
| GO:000377 | actin binF | 5  | 63 | 83  | 2002 | 0.116772 | 0.571875 |
| GO:004425 | cellular P | 4  | 63 | 60  | 2002 | 0.117248 | 0.571875 |
| GO:000628 | DNA repaiP | 2  | 63 | 19  | 2002 | 0.118349 | 0.571875 |
| GO:001567 | monovalenP | 2  | 63 | 19  | 2002 | 0.118349 | 0.571875 |
| GO:190303 | regulatioP | 2  | 63 | 19  | 2002 | 0.118349 | 0.571875 |
| GO:190336 | regulatioP | 2  | 63 | 19  | 2002 | 0.118349 | 0.571875 |
| GO:015003 | distal axC | 2  | 63 | 19  | 2002 | 0.118349 | 0.571875 |
| GO:000521 | ion channF | 2  | 63 | 19  | 2002 | 0.118349 | 0.571875 |
| GO:001507 | monovalenF | 2  | 63 | 19  | 2002 | 0.118349 | 0.571875 |
| GO:19035C | regulatioP | 7  | 63 | 133 | 2002 | 0.120271 | 0.576953 |
| GO:200114 | regulatioP | 7  | 63 | 134 | 2002 | 0.123843 | 0.577062 |
| GO:00065C | proteolysP | 8  | 63 | 161 | 2002 | 0.128119 | 0.577062 |
| GO:003432 | cell juncP | 2  | 63 | 20  | 2002 | 0.128931 | 0.577062 |
| GO:005071 | positive P | 2  | 63 | 20  | 2002 | 0.128931 | 0.577062 |
| GO:009025 | regulatioP | 2  | 63 | 20  | 2002 | 0.128931 | 0.577062 |
| GO:004356 | sequence-F | 2  | 63 | 20  | 2002 | 0.128931 | 0.577062 |
| GO:000651 | ubiquitinP | 3  | 63 | 40  | 2002 | 0.129011 | 0.577062 |
| GO:001994 | modificatP | 3  | 63 | 40  | 2002 | 0.129011 | 0.577062 |
| GO:004363 | modificatP | 3  | 63 | 40  | 2002 | 0.129011 | 0.577062 |
| GO:004405 | regulatioP | 3  | 63 | 40  | 2002 | 0.129011 | 0.577062 |
| GO:003132 | regulatioP | 9  | 63 | 190 | 2002 | 0.136586 | 0.600647 |
| GO:200011 | regulatioP | 8  | 63 | 164 | 2002 | 0.138387 | 0.600647 |
| GO:000166 | ameboidalP | 2  | 63 | 21  | 2002 | 0.139728 | 0.600647 |
| GO:001648 | protein pP | 2  | 63 | 21  | 2002 | 0.139728 | 0.600647 |

|                     |    |    |     |      |          |          |
|---------------------|----|----|-----|------|----------|----------|
| GO:003433cell_juncP | 2  | 63 | 21  | 2002 | 0.139728 | 0.600647 |
| GO:200037regulatioP | 2  | 63 | 21  | 2002 | 0.139728 | 0.600647 |
| GO:000828cell_popuP | 3  | 63 | 42  | 2002 | 0.143561 | 0.613143 |
| GO:007001peptidaseF | 6  | 63 | 114 | 2002 | 0.145132 | 0.61588  |
| GO:000279positive_P | 2  | 63 | 22  | 2002 | 0.150715 | 0.61971  |
| GO:000961response_P | 2  | 63 | 22  | 2002 | 0.150715 | 0.61971  |
| GO:004887multicellP | 2  | 63 | 22  | 2002 | 0.150715 | 0.61971  |
| GO:007134cellular_P | 2  | 63 | 22  | 2002 | 0.150715 | 0.61971  |
| GO:004698protein_hF | 2  | 63 | 22  | 2002 | 0.150715 | 0.61971  |
| GO:004487protein-cF | 8  | 63 | 168 | 2002 | 0.152722 | 0.624086 |
| GO:007055response_P | 2  | 63 | 23  | 2002 | 0.161871 | 0.645714 |
| GO:004517apical_paC | 2  | 63 | 23  | 2002 | 0.161871 | 0.645714 |
| GO:000551collagen_F | 2  | 63 | 23  | 2002 | 0.161871 | 0.645714 |
| GO:000823peptidaseF | 6  | 63 | 118 | 2002 | 0.162956 | 0.645714 |
| GO:003016protein_cP | 4  | 63 | 68  | 2002 | 0.163257 | 0.645714 |
| GO:000521transportF | 5  | 63 | 93  | 2002 | 0.165315 | 0.645714 |
| GO:003134positive_P | 3  | 63 | 45  | 2002 | 0.166353 | 0.645714 |
| GO:001507ion_transF | 3  | 63 | 45  | 2002 | 0.166353 | 0.645714 |
| GO:000988regulatioP | 9  | 63 | 199 | 2002 | 0.167183 | 0.645714 |
| GO:001055regulatioP | 8  | 63 | 172 | 2002 | 0.167769 | 0.645714 |
| GO:005125regulatioP | 7  | 63 | 146 | 2002 | 0.170859 | 0.653807 |
| GO:003422ion_transP | 3  | 63 | 46  | 2002 | 0.174181 | 0.66269  |
| GO:004316ion_bindiF | 24 | 63 | 639 | 2002 | 0.17525  | 0.662945 |
| GO:000809cytoskeleF | 6  | 63 | 121 | 2002 | 0.176931 | 0.665501 |
| GO:001990protein_kF | 3  | 63 | 47  | 2002 | 0.182115 | 0.68113  |
| GO:003003actin_cytP | 4  | 63 | 72  | 2002 | 0.188434 | 0.700805 |
| GO:000701actin_filP | 3  | 63 | 48  | 2002 | 0.190147 | 0.703224 |
| GO:001678hydrolaseF | 13 | 63 | 319 | 2002 | 0.191726 | 0.705126 |
| GO:000681cation_trP | 3  | 63 | 49  | 2002 | 0.19827  | 0.725166 |
| GO:190136heterocycF | 17 | 63 | 441 | 2002 | 0.206248 | 0.735551 |
| GO:000823serine-tyF | 3  | 63 | 50  | 2002 | 0.20648  | 0.735551 |
| GO:001682hydrolaseF | 3  | 63 | 50  | 2002 | 0.20648  | 0.735551 |
| GO:001717serine_hyF | 3  | 63 | 50  | 2002 | 0.20648  | 0.735551 |
| GO:005149positive_P | 2  | 63 | 27  | 2002 | 0.207777 | 0.735551 |
| GO:000823exopeptidF | 2  | 63 | 27  | 2002 | 0.207777 | 0.735551 |
| GO:005101actin_filF | 3  | 63 | 51  | 2002 | 0.214768 | 0.748954 |
| GO:004698protein_dF | 4  | 63 | 76  | 2002 | 0.214799 | 0.748954 |
| GO:001921regulatioP | 7  | 63 | 156 | 2002 | 0.215331 | 0.748954 |
| GO:000625DNA_metabP | 2  | 63 | 28  | 2002 | 0.219482 | 0.748954 |
| GO:005160protein_mP | 2  | 63 | 28  | 2002 | 0.219482 | 0.748954 |
| GO:190290positive_P | 2  | 63 | 28  | 2002 | 0.219482 | 0.748954 |
| GO:190353positive_P | 2  | 63 | 28  | 2002 | 0.219482 | 0.748954 |
| GO:001562actin_cytC | 4  | 63 | 77  | 2002 | 0.221552 | 0.75214  |
| GO:009715organic_cF | 17 | 63 | 447 | 2002 | 0.223695 | 0.75554  |
| GO:000916nucleotidP | 2  | 63 | 29  | 2002 | 0.231246 | 0.761616 |
| GO:007121cellular_P | 2  | 63 | 29  | 2002 | 0.231246 | 0.761616 |
| GO:010400cellular_P | 2  | 63 | 29  | 2002 | 0.231246 | 0.761616 |
| GO:190129nucleosidP | 2  | 63 | 29  | 2002 | 0.231246 | 0.761616 |
| GO:001682lyase_actF | 2  | 63 | 29  | 2002 | 0.231246 | 0.761616 |
| GO:005122regulatioP | 3  | 63 | 54  | 2002 | 0.240047 | 0.786688 |
| GO:000699organelleP | 9  | 63 | 218 | 2002 | 0.241439 | 0.787352 |

|                     |    |    |     |      |          |          |
|---------------------|----|----|-----|------|----------|----------|
| GO:00199Ckinase biF | 3  | 63 | 55  | 2002 | 0.248591 | 0.80351  |
| GO:000716negative P | 2  | 63 | 31  | 2002 | 0.25489  | 0.80351  |
| GO:001656protein uP | 2  | 63 | 31  | 2002 | 0.25489  | 0.80351  |
| GO:004217regulatioP | 2  | 63 | 31  | 2002 | 0.25489  | 0.80351  |
| GO:005122positive P | 2  | 63 | 31  | 2002 | 0.25489  | 0.80351  |
| GO:002003heme bindF | 2  | 63 | 31  | 2002 | 0.25489  | 0.80351  |
| GO:00469CtetrapyrF  | 2  | 63 | 31  | 2002 | 0.25489  | 0.80351  |
| GO:000269regulatioP | 11 | 63 | 280 | 2002 | 0.258282 | 0.810345 |
| GO:000988tissue deP | 7  | 63 | 166 | 2002 | 0.263712 | 0.821319 |
| GO:009008regulatioP | 3  | 63 | 57  | 2002 | 0.265821 | 0.821319 |
| GO:005072regulatioP | 2  | 63 | 32  | 2002 | 0.266743 | 0.821319 |
| GO:005104positive P | 2  | 63 | 32  | 2002 | 0.266743 | 0.821319 |
| GO:00300Cmetal ionP | 2  | 63 | 33  | 2002 | 0.278599 | 0.842157 |
| GO:003244protein mP | 2  | 63 | 33  | 2002 | 0.278599 | 0.842157 |
| GO:00005CproteasomC | 2  | 63 | 33  | 2002 | 0.278599 | 0.842157 |
| GO:190536endopeptiC | 2  | 63 | 33  | 2002 | 0.278599 | 0.842157 |
| GO:000588integral C | 3  | 63 | 59  | 2002 | 0.283203 | 0.849873 |
| GO:003809Fc receptP | 10 | 63 | 257 | 2002 | 0.283719 | 0.849873 |
| GO:005124regulatioP | 6  | 63 | 142 | 2002 | 0.286514 | 0.854379 |
| GO:000635regulatioP | 4  | 63 | 88  | 2002 | 0.298998 | 0.880977 |
| GO:004426cellular P | 4  | 63 | 88  | 2002 | 0.298998 | 0.880977 |
| GO:00702CregulatioP | 3  | 63 | 61  | 2002 | 0.300694 | 0.880977 |
| GO:00507CregulatioP | 2  | 63 | 35  | 2002 | 0.302275 | 0.880977 |
| GO:190536peptidaseC | 2  | 63 | 35  | 2002 | 0.302275 | 0.880977 |
| GO:000269regulatioP | 6  | 63 | 145 | 2002 | 0.303418 | 0.880977 |
| GO:005149regulatioP | 3  | 63 | 62  | 2002 | 0.309468 | 0.889686 |
| GO:004322non-membrC | 11 | 63 | 293 | 2002 | 0.310449 | 0.889686 |
| GO:004323intracellC | 11 | 63 | 293 | 2002 | 0.310449 | 0.889686 |
| GO:001081regulatioP | 2  | 63 | 36  | 2002 | 0.314074 | 0.892347 |
| GO:005105negative P | 2  | 63 | 36  | 2002 | 0.314074 | 0.892347 |
| GO:000609generatioP | 3  | 63 | 63  | 2002 | 0.318253 | 0.900357 |
| GO:000279regulatioP | 2  | 63 | 37  | 2002 | 0.325833 | 0.9047   |
| GO:00199Cprotein dF | 2  | 63 | 37  | 2002 | 0.325833 | 0.9047   |
| GO:001647cell migrP | 12 | 63 | 327 | 2002 | 0.326848 | 0.9047   |
| GO:003134regulatioP | 3  | 63 | 64  | 2002 | 0.327046 | 0.9047   |
| GO:00321Cpositive P | 3  | 63 | 64  | 2002 | 0.327046 | 0.9047   |
| GO:000519structuraF | 7  | 63 | 179 | 2002 | 0.330806 | 0.9047   |
| GO:00509CleukocyteP | 10 | 63 | 269 | 2002 | 0.335567 | 0.9047   |
| GO:190495positive P | 2  | 63 | 38  | 2002 | 0.337544 | 0.9047   |
| GO:003355cellular P | 5  | 63 | 122 | 2002 | 0.337975 | 0.9047   |
| GO:00903Cnucleic aP | 4  | 63 | 94  | 2002 | 0.34275  | 0.9047   |
| GO:005086regulatioP | 6  | 63 | 152 | 2002 | 0.343574 | 0.9047   |
| GO:000367nucleic aF | 8  | 63 | 212 | 2002 | 0.348382 | 0.9047   |
| GO:000243Fc receptP | 9  | 63 | 242 | 2002 | 0.34899  | 0.9047   |
| GO:000243immune reP | 9  | 63 | 242 | 2002 | 0.34899  | 0.9047   |
| GO:003809Fc-gamma P | 9  | 63 | 242 | 2002 | 0.34899  | 0.9047   |
| GO:003809Fc-gamma P | 9  | 63 | 242 | 2002 | 0.34899  | 0.9047   |
| GO:19037CregulatioP | 2  | 63 | 39  | 2002 | 0.349198 | 0.9047   |
| GO:003042axon C     | 2  | 63 | 39  | 2002 | 0.349198 | 0.9047   |
| GO:004887cell motiP | 12 | 63 | 333 | 2002 | 0.351188 | 0.9047   |
| GO:005167localizatP | 12 | 63 | 333 | 2002 | 0.351188 | 0.9047   |

|                     |    |    |     |      |          |          |
|---------------------|----|----|-----|------|----------|----------|
| G0:004858positive P | 17 | 63 | 486 | 2002 | 0.3517   | 0.9047   |
| G0:000998cell surfC | 8  | 63 | 213 | 2002 | 0.353362 | 0.9047   |
| G0:001943aromatic P | 3  | 63 | 67  | 2002 | 0.353422 | 0.9047   |
| G0:003122intrinsicC | 3  | 63 | 67  | 2002 | 0.353422 | 0.9047   |
| G0:005117negative P | 6  | 63 | 154 | 2002 | 0.35518  | 0.9047   |
| G0:000582cytosol C  | 15 | 63 | 427 | 2002 | 0.360621 | 0.9047   |
| G0:000268negative P | 2  | 63 | 40  | 2002 | 0.360787 | 0.9047   |
| G0:001081regulatioP | 2  | 63 | 40  | 2002 | 0.360787 | 0.9047   |
| G0:008013regulatioP | 2  | 63 | 40  | 2002 | 0.360787 | 0.9047   |
| G0:00904CorganophcP | 2  | 63 | 40  | 2002 | 0.360787 | 0.9047   |
| G0:200014positive P | 3  | 63 | 68  | 2002 | 0.362199 | 0.904815 |
| G0:004691transitioF | 4  | 63 | 97  | 2002 | 0.364764 | 0.907797 |
| G0:003809Fc-epsiloP | 9  | 63 | 246 | 2002 | 0.367825 | 0.910742 |
| G0:000563nucleus C  | 13 | 63 | 368 | 2002 | 0.36945  | 0.910742 |
| G0:001813heterocycP | 3  | 63 | 69  | 2002 | 0.370962 | 0.910742 |
| G0:007064protein mP | 2  | 63 | 41  | 2002 | 0.372303 | 0.910742 |
| G0:004648heterocycP | 7  | 63 | 187 | 2002 | 0.373531 | 0.910742 |
| G0:000268positive P | 14 | 63 | 400 | 2002 | 0.374713 | 0.910742 |
| G0:005077regulatioP | 14 | 63 | 401 | 2002 | 0.378593 | 0.910742 |
| G0:200014regulatioP | 4  | 63 | 99  | 2002 | 0.379443 | 0.910742 |
| G0:005127positive P | 3  | 63 | 70  | 2002 | 0.379705 | 0.910742 |
| G0:009859plasma meC | 3  | 63 | 70  | 2002 | 0.379705 | 0.910742 |
| G0:011005regulatioP | 2  | 63 | 42  | 2002 | 0.38374  | 0.913799 |
| G0:000569chromosomC | 2  | 63 | 42  | 2002 | 0.38374  | 0.913799 |
| G0:190156organonitP | 4  | 63 | 100 | 2002 | 0.386776 | 0.914449 |
| G0:001711nucleosidF | 4  | 63 | 100 | 2002 | 0.386776 | 0.914449 |
| G0:00069CphagocytoP | 11 | 63 | 312 | 2002 | 0.391167 | 0.921539 |
| G0:000242immune reP | 11 | 63 | 313 | 2002 | 0.395505 | 0.925173 |
| G0:000276immune reP | 11 | 63 | 313 | 2002 | 0.395505 | 0.925173 |
| G0:001064positive P | 5  | 63 | 132 | 2002 | 0.402429 | 0.931054 |
| G0:005125positive P | 5  | 63 | 132 | 2002 | 0.402429 | 0.931054 |
| G0:004001positive P | 3  | 63 | 73  | 2002 | 0.405788 | 0.931054 |
| G0:004578positive P | 2  | 63 | 44  | 2002 | 0.406351 | 0.931054 |
| G0:000425serine-tyF | 2  | 63 | 44  | 2002 | 0.406351 | 0.931054 |
| G0:002305positive P | 5  | 63 | 133 | 2002 | 0.408876 | 0.931054 |
| G0:000269positive P | 5  | 63 | 134 | 2002 | 0.415317 | 0.931054 |
| G0:005127regulatioP | 4  | 63 | 104 | 2002 | 0.416007 | 0.931054 |
| G0:000672cellular P | 7  | 63 | 195 | 2002 | 0.416696 | 0.931054 |
| G0:000268regulatioP | 15 | 63 | 442 | 2002 | 0.417487 | 0.931054 |
| G0:005086positive P | 5  | 63 | 135 | 2002 | 0.42175  | 0.931054 |
| G0:190136organic cP | 3  | 63 | 75  | 2002 | 0.423017 | 0.931054 |
| G0:190249catalyticC | 3  | 63 | 75  | 2002 | 0.423017 | 0.931054 |
| G0:001646pyrophospF | 4  | 63 | 105 | 2002 | 0.423278 | 0.931054 |
| G0:001681hydrolaseF | 4  | 63 | 105 | 2002 | 0.423278 | 0.931054 |
| G0:001681hydrolaseF | 4  | 63 | 105 | 2002 | 0.423278 | 0.931054 |
| G0:003132negative P | 6  | 63 | 166 | 2002 | 0.425266 | 0.931054 |
| G0:000687cellular P | 2  | 63 | 46  | 2002 | 0.428575 | 0.931054 |
| G0:003802signalingF | 2  | 63 | 46  | 2002 | 0.428575 | 0.931054 |
| G0:006008molecularF | 2  | 63 | 46  | 2002 | 0.428575 | 0.931054 |
| G0:000275immune reP | 11 | 63 | 321 | 2002 | 0.430349 | 0.931054 |
| G0:000276immune reP | 11 | 63 | 321 | 2002 | 0.430349 | 0.931054 |

|                     |    |    |      |      |          |          |
|---------------------|----|----|------|------|----------|----------|
| GO:004803cofactor F | 3  | 63 | 76   | 2002 | 0.431574 | 0.931054 |
| GO:004001locomotioP | 12 | 63 | 353  | 2002 | 0.434466 | 0.931054 |
| GO:000803cell reccP | 5  | 63 | 137  | 2002 | 0.434585 | 0.931054 |
| GO:005085antigen rP | 5  | 63 | 137  | 2002 | 0.434585 | 0.931054 |
| GO:004001regulatioP | 4  | 63 | 107  | 2002 | 0.437762 | 0.932916 |
| GO:003464cellular P | 9  | 63 | 261  | 2002 | 0.439314 | 0.932916 |
| GO:003288regulatioP | 3  | 63 | 77   | 2002 | 0.440088 | 0.932916 |
| GO:001604cellular P | 18 | 63 | 542  | 2002 | 0.441092 | 0.932916 |
| GO:000613nucleobasP | 6  | 63 | 169  | 2002 | 0.442746 | 0.933296 |
| GO:003044regulatioP | 9  | 63 | 262  | 2002 | 0.444091 | 0.933296 |
| GO:000292regulatioP | 9  | 63 | 263  | 2002 | 0.448865 | 0.940345 |
| GO:003000cellular P | 2  | 63 | 49   | 2002 | 0.461099 | 0.959898 |
| GO:003295regulatioP | 2  | 63 | 49   | 2002 | 0.461099 | 0.959898 |
| GO:009879membrane C | 3  | 63 | 80   | 2002 | 0.465348 | 0.965308 |
| GO:000225activatioP | 12 | 63 | 361  | 2002 | 0.468102 | 0.965308 |
| GO:007184cellular P | 18 | 63 | 550  | 2002 | 0.469964 | 0.965308 |
| GO:006106muscle stP | 2  | 63 | 50   | 2002 | 0.471708 | 0.965308 |
| GO:000417endopeptiF | 3  | 63 | 81   | 2002 | 0.473664 | 0.965308 |
| GO:000548binding F  | 46 | 63 | 1438 | 2002 | 0.479644 | 0.965308 |
| GO:001707purine nuF | 7  | 63 | 207  | 2002 | 0.481152 | 0.965308 |
| GO:000681ion transP | 3  | 63 | 82   | 2002 | 0.481925 | 0.965308 |
| GO:004300neuron prC | 3  | 63 | 82   | 2002 | 0.481925 | 0.965308 |
| GO:000687cellular P | 2  | 63 | 51   | 2002 | 0.482195 | 0.965308 |
| GO:004408positive P | 2  | 63 | 51   | 2002 | 0.482195 | 0.965308 |
| GO:005506metal ionP | 2  | 63 | 51   | 2002 | 0.482195 | 0.965308 |
| GO:005117regulatioP | 11 | 63 | 333  | 2002 | 0.482654 | 0.965308 |
| GO:003055adenyl nuF | 5  | 63 | 145  | 2002 | 0.485312 | 0.965359 |
| GO:001060negative P | 6  | 63 | 177  | 2002 | 0.48888  | 0.965359 |
| GO:005105positive P | 3  | 63 | 83   | 2002 | 0.490128 | 0.965359 |
| GO:014009catalyticF | 7  | 63 | 209  | 2002 | 0.491765 | 0.965359 |
| GO:190353regulatioP | 2  | 63 | 52   | 2002 | 0.492558 | 0.965359 |
| GO:000905macromoleP | 4  | 63 | 115  | 2002 | 0.494625 | 0.965359 |
| GO:000828lipid binF | 3  | 63 | 84   | 2002 | 0.49827  | 0.965359 |
| GO:190136organic cP | 7  | 63 | 211  | 2002 | 0.502324 | 0.965359 |
| GO:000181regulatioP | 2  | 63 | 54   | 2002 | 0.512899 | 0.965359 |
| GO:001063positive P | 2  | 63 | 54   | 2002 | 0.512899 | 0.965359 |
| GO:003297regulatioP | 2  | 63 | 54   | 2002 | 0.512899 | 0.965359 |
| GO:005508cation hcP | 2  | 63 | 54   | 2002 | 0.512899 | 0.965359 |
| GO:000961response P | 6  | 63 | 182  | 2002 | 0.517177 | 0.965359 |
| GO:008013regulatioP | 4  | 63 | 119  | 2002 | 0.522218 | 0.965359 |
| GO:006034regulatioP | 2  | 63 | 55   | 2002 | 0.522873 | 0.965359 |
| GO:000392GTPase acF | 2  | 63 | 55   | 2002 | 0.522873 | 0.965359 |
| GO:001046regulatioP | 7  | 63 | 215  | 2002 | 0.52325  | 0.965359 |
| GO:000225immune efP | 14 | 63 | 438  | 2002 | 0.524013 | 0.965359 |
| GO:000246adaptive P | 10 | 63 | 311  | 2002 | 0.52505  | 0.965359 |
| GO:009865import inP | 11 | 63 | 343  | 2002 | 0.525726 | 0.965359 |
| GO:004851animal orP | 8  | 63 | 248  | 2002 | 0.528684 | 0.965359 |
| GO:005085B cell reP | 4  | 63 | 120  | 2002 | 0.529013 | 0.965359 |
| GO:004257immunoglcC | 4  | 63 | 120  | 2002 | 0.529013 | 0.965359 |
| GO:000244lymphocytP | 10 | 63 | 312  | 2002 | 0.529483 | 0.965359 |
| GO:004408regulatioP | 3  | 63 | 88   | 2002 | 0.530198 | 0.965359 |

|                     |    |    |     |      |          |          |
|---------------------|----|----|-----|------|----------|----------|
| GO:00447Cmulti-orgP | 2  | 63 | 56  | 2002 | 0.532713 | 0.965359 |
| GO:005104regulatioP | 2  | 63 | 56  | 2002 | 0.532713 | 0.965359 |
| GO:012003regulatioP | 2  | 63 | 56  | 2002 | 0.532713 | 0.965359 |
| GO:003287regulatioP | 7  | 63 | 217 | 2002 | 0.533606 | 0.965359 |
| GO:005077positive P | 12 | 63 | 377 | 2002 | 0.534651 | 0.965359 |
| GO:005086regulatioP | 4  | 63 | 121 | 2002 | 0.535763 | 0.965359 |
| GO:005087positive P | 4  | 63 | 121 | 2002 | 0.535763 | 0.965359 |
| GO:003498immunogloF | 4  | 63 | 121 | 2002 | 0.535763 | 0.965359 |
| GO:00226Ccellular P | 6  | 63 | 186 | 2002 | 0.539422 | 0.965359 |
| GO:000675nucleosidP | 2  | 63 | 57  | 2002 | 0.542418 | 0.965359 |
| GO:000911nucleotidP | 2  | 63 | 57  | 2002 | 0.542418 | 0.965359 |
| GO:003134regulatioP | 2  | 63 | 57  | 2002 | 0.542418 | 0.965359 |
| GO:005508cellular P | 2  | 63 | 57  | 2002 | 0.542418 | 0.965359 |
| GO:009877inorganicP | 2  | 63 | 57  | 2002 | 0.542418 | 0.965359 |
| GO:000827zinc ion F | 2  | 63 | 57  | 2002 | 0.542418 | 0.965359 |
| GO:000691phagocytoP | 4  | 63 | 122 | 2002 | 0.542467 | 0.965359 |
| GO:000689receptor-P | 8  | 63 | 252 | 2002 | 0.548055 | 0.972687 |
| GO:003465nucleobasP | 2  | 63 | 58  | 2002 | 0.551987 | 0.974452 |
| GO:003132regulatioP | 11 | 63 | 350 | 2002 | 0.555331 | 0.974452 |
| GO:000691phagocytoP | 4  | 63 | 124 | 2002 | 0.555736 | 0.974452 |
| GO:009902plasma meP | 4  | 63 | 124 | 2002 | 0.555736 | 0.974452 |
| GO:004508innate inP | 6  | 63 | 190 | 2002 | 0.561257 | 0.974452 |
| GO:006102membrane P | 6  | 63 | 190 | 2002 | 0.561257 | 0.974452 |
| GO:004559negative P | 2  | 63 | 59  | 2002 | 0.561418 | 0.974452 |
| GO:000996positive P | 4  | 63 | 125 | 2002 | 0.562297 | 0.974452 |
| GO:001032membrane P | 4  | 63 | 125 | 2002 | 0.562297 | 0.974452 |
| GO:003015cell diffP | 8  | 63 | 256 | 2002 | 0.567136 | 0.980272 |
| GO:000695complemenP | 10 | 63 | 321 | 2002 | 0.56881  | 0.980604 |
| GO:000695inflammatP | 2  | 63 | 60  | 2002 | 0.570711 | 0.981326 |
| GO:004408cellular P | 6  | 63 | 194 | 2002 | 0.582635 | 0.991945 |
| GO:000573mitochondC | 3  | 63 | 95  | 2002 | 0.583344 | 0.991945 |
| GO:000989negative P | 6  | 63 | 195 | 2002 | 0.587903 | 0.991945 |
| GO:003033regulatioP | 3  | 63 | 96  | 2002 | 0.590632 | 0.991945 |
| GO:00508Cion homecP | 2  | 63 | 63  | 2002 | 0.59775  | 0.991945 |
| GO:000016nucleotidF | 7  | 63 | 230 | 2002 | 0.59876  | 0.991945 |
| GO:190126nucleosidF | 7  | 63 | 230 | 2002 | 0.59876  | 0.991945 |
| GO:003033positive P | 2  | 63 | 64  | 2002 | 0.606482 | 0.991945 |
| GO:004886cellular P | 8  | 63 | 266 | 2002 | 0.613353 | 0.991945 |
| GO:003132regulatioP | 2  | 63 | 65  | 2002 | 0.615074 | 0.991945 |
| GO:000013Golgi memC | 2  | 63 | 65  | 2002 | 0.615074 | 0.991945 |
| GO:003304regulatioP | 3  | 63 | 100 | 2002 | 0.618983 | 0.991945 |
| GO:005104regulatioP | 4  | 63 | 134 | 2002 | 0.61899  | 0.991945 |
| GO:012003plasma meP | 2  | 63 | 66  | 2002 | 0.623525 | 0.991945 |
| GO:001649oxidoreduF | 3  | 63 | 101 | 2002 | 0.625867 | 0.991945 |
| GO:004851positive P | 22 | 63 | 723 | 2002 | 0.626588 | 0.991945 |
| GO:000225adaptive P | 10 | 63 | 335 | 2002 | 0.627394 | 0.991945 |
| GO:000689endocytosP | 10 | 63 | 335 | 2002 | 0.627394 | 0.991945 |
| GO:004858regulatioP | 18 | 63 | 595 | 2002 | 0.627973 | 0.991945 |
| GO:003255ribonucleF | 6  | 63 | 203 | 2002 | 0.628849 | 0.991945 |
| GO:003255purine riF | 6  | 63 | 203 | 2002 | 0.628849 | 0.991945 |
| GO:004559regulatioP | 4  | 63 | 136 | 2002 | 0.630978 | 0.991945 |

|                     |    |    |     |      |          |          |
|---------------------|----|----|-----|------|----------|----------|
| GO:003003cell projP | 2  | 63 | 67  | 2002 | 0.631836 | 0.991945 |
| GO:000188nucleosidF | 2  | 63 | 67  | 2002 | 0.631836 | 0.991945 |
| GO:000188purine nuF | 2  | 63 | 67  | 2002 | 0.631836 | 0.991945 |
| GO:000552GTP bindiF | 2  | 63 | 67  | 2002 | 0.631836 | 0.991945 |
| GO:00190Cguanyl nuF | 2  | 63 | 67  | 2002 | 0.631836 | 0.991945 |
| GO:003254ribonucleF | 2  | 63 | 67  | 2002 | 0.631836 | 0.991945 |
| GO:003255purine riF | 2  | 63 | 67  | 2002 | 0.631836 | 0.991945 |
| GO:003256guanyl riF | 2  | 63 | 67  | 2002 | 0.631836 | 0.991945 |
| GO:003198vesicle C  | 17 | 63 | 564 | 2002 | 0.632162 | 0.991945 |
| GO:005079regulatioP | 6  | 63 | 204 | 2002 | 0.63381  | 0.991945 |
| GO:00432Cresponse P | 7  | 63 | 238 | 2002 | 0.636624 | 0.991945 |
| GO:00517Cresponse P | 7  | 63 | 238 | 2002 | 0.636624 | 0.991945 |
| GO:001922regulatioP | 12 | 63 | 404 | 2002 | 0.640832 | 0.991945 |
| GO:00096Cresponse P | 7  | 63 | 239 | 2002 | 0.641222 | 0.991945 |
| GO:00321CregulatioP | 3  | 63 | 104 | 2002 | 0.646022 | 0.991945 |
| GO:000245humoral iP | 9  | 63 | 307 | 2002 | 0.647654 | 0.991945 |
| GO:000695complemenP | 9  | 63 | 307 | 2002 | 0.647654 | 0.991945 |
| GO:000741central nP | 2  | 63 | 69  | 2002 | 0.648038 | 0.991945 |
| GO:000828positive P | 2  | 63 | 69  | 2002 | 0.648038 | 0.991945 |
| GO:001606immunogloP | 9  | 63 | 308 | 2002 | 0.651746 | 0.991945 |
| GO:001972B cell meP | 9  | 63 | 308 | 2002 | 0.651746 | 0.991945 |
| GO:000244leukocyteP | 12 | 63 | 407 | 2002 | 0.651923 | 0.991945 |
| GO:000726cell-cellP | 2  | 63 | 70  | 2002 | 0.65593  | 0.991945 |
| GO:001631phosphoryP | 3  | 63 | 106 | 2002 | 0.65904  | 0.991945 |
| GO:00650Cprotein-cP | 3  | 63 | 106 | 2002 | 0.65904  | 0.991945 |
| GO:003255adenyl riF | 4  | 63 | 141 | 2002 | 0.659918 | 0.991945 |
| GO:001677transferaF | 2  | 63 | 71  | 2002 | 0.663684 | 0.991945 |
| GO:001989enzyme biF | 4  | 63 | 142 | 2002 | 0.665526 | 0.991945 |
| GO:008009regulatioP | 10 | 63 | 345 | 2002 | 0.666832 | 0.991945 |
| GO:003299protein-cC | 20 | 63 | 672 | 2002 | 0.668102 | 0.991945 |
| GO:005087regulatioP | 2  | 63 | 72  | 2002 | 0.6713   | 0.991945 |
| GO:000962response P | 3  | 63 | 108 | 2002 | 0.671722 | 0.991945 |
| GO:009854defense rP | 6  | 63 | 212 | 2002 | 0.672147 | 0.991945 |
| GO:00325CmulticellP | 14 | 63 | 479 | 2002 | 0.674449 | 0.991945 |
| GO:00096Cresponse P | 9  | 63 | 314 | 2002 | 0.675772 | 0.991945 |
| GO:003005cell juncC | 3  | 63 | 109 | 2002 | 0.677936 | 0.991945 |
| GO:00052CextracellF | 2  | 63 | 73  | 2002 | 0.678779 | 0.991945 |
| GO:005113positive P | 3  | 63 | 110 | 2002 | 0.684066 | 0.991945 |
| GO:000989regulatioP | 2  | 63 | 74  | 2002 | 0.686122 | 0.991945 |
| GO:00106Cpositive P | 5  | 63 | 182 | 2002 | 0.692793 | 0.991945 |
| GO:003132positive P | 5  | 63 | 182 | 2002 | 0.692793 | 0.991945 |
| GO:000695humoral iP | 10 | 63 | 352 | 2002 | 0.693071 | 0.991945 |
| GO:000193positive P | 2  | 63 | 75  | 2002 | 0.693331 | 0.991945 |
| GO:000695defense rP | 7  | 63 | 251 | 2002 | 0.693853 | 0.991945 |
| GO:003227positive P | 3  | 63 | 112 | 2002 | 0.696072 | 0.991945 |
| GO:004858negative P | 4  | 63 | 148 | 2002 | 0.697894 | 0.991945 |
| GO:001064regulatioP | 6  | 63 | 218 | 2002 | 0.699256 | 0.991945 |
| GO:000382catalyticF | 19 | 63 | 650 | 2002 | 0.699509 | 0.991945 |
| GO:005508nucleobasP | 2  | 63 | 76  | 2002 | 0.700405 | 0.991945 |
| GO:00000CreproductP | 2  | 63 | 77  | 2002 | 0.707347 | 0.991945 |
| GO:001024response P | 2  | 63 | 77  | 2002 | 0.707347 | 0.991945 |



|                     |    |    |      |      |          |          |
|---------------------|----|----|------|------|----------|----------|
| GO:002241reproductP | 2  | 63 | 77   | 2002 | 0.707347 | 0.991945 |
| GO:000716cell surfP | 13 | 63 | 456  | 2002 | 0.707462 | 0.991945 |
| GO:000989external C | 4  | 63 | 150  | 2002 | 0.70819  | 0.991945 |
| GO:004232positive P | 2  | 63 | 78   | 2002 | 0.714157 | 0.991945 |
| GO:006025regulatioP | 10 | 63 | 359  | 2002 | 0.7181   | 0.991945 |
| GO:002305regulatioP | 6  | 63 | 224  | 2002 | 0.7249   | 0.991945 |
| GO:001055positive P | 2  | 63 | 80   | 2002 | 0.727388 | 0.991945 |
| GO:005511oxidationP | 3  | 63 | 118  | 2002 | 0.730074 | 0.991945 |
| GO:000551protein bF | 27 | 63 | 919  | 2002 | 0.73206  | 0.991945 |
| GO:004274defense rP | 4  | 63 | 155  | 2002 | 0.732847 | 0.991945 |
| GO:00314Cpositive P | 2  | 63 | 81   | 2002 | 0.733812 | 0.991945 |
| GO:004322organelleC | 30 | 63 | 1015 | 2002 | 0.733945 | 0.991945 |
| GO:001602integral C | 7  | 63 | 262  | 2002 | 0.737728 | 0.991945 |
| GO:000972response P | 2  | 63 | 82   | 2002 | 0.740109 | 0.991945 |
| GO:005109negative P | 2  | 63 | 82   | 2002 | 0.740109 | 0.991945 |
| GO:004393protein-cP | 3  | 63 | 120  | 2002 | 0.740743 | 0.991945 |
| GO:000382antigen bF | 6  | 63 | 229  | 2002 | 0.745129 | 0.991945 |
| GO:005124positive P | 3  | 63 | 121  | 2002 | 0.745954 | 0.991945 |
| GO:004887chemical P | 2  | 63 | 83   | 2002 | 0.746281 | 0.991945 |
| GO:009736carbohydrF | 8  | 63 | 299  | 2002 | 0.746581 | 0.991945 |
| GO:005123regulatioP | 7  | 63 | 265  | 2002 | 0.74894  | 0.991945 |
| GO:004322intracellC | 25 | 63 | 862  | 2002 | 0.750276 | 0.991945 |
| GO:004846cell deveP | 3  | 63 | 122  | 2002 | 0.751084 | 0.991945 |
| GO:000588plasma meC | 17 | 63 | 603  | 2002 | 0.752096 | 0.991945 |
| GO:001056positive P | 2  | 63 | 84   | 2002 | 0.75233  | 0.991945 |
| GO:004593positive P | 2  | 63 | 84   | 2002 | 0.75233  | 0.991945 |
| GO:190169response P | 2  | 63 | 84   | 2002 | 0.75233  | 0.991945 |
| GO:003609small molF | 8  | 63 | 301  | 2002 | 0.753575 | 0.991945 |
| GO:000646cellular P | 5  | 63 | 196  | 2002 | 0.755164 | 0.991945 |
| GO:003621protein mP | 5  | 63 | 196  | 2002 | 0.755164 | 0.991945 |
| GO:003141cytoplasmC | 6  | 63 | 232  | 2002 | 0.756766 | 0.991945 |
| GO:00977CintracellC | 6  | 63 | 232  | 2002 | 0.756766 | 0.991945 |
| GO:009855side of mC | 4  | 63 | 161  | 2002 | 0.760402 | 0.991945 |
| GO:012002plasma meC | 3  | 63 | 124  | 2002 | 0.761101 | 0.991945 |
| GO:004341macromoleP | 5  | 63 | 198  | 2002 | 0.763282 | 0.991945 |
| GO:001972cellular P | 2  | 63 | 86   | 2002 | 0.764064 | 0.991945 |
| GO:005112regulatioP | 5  | 63 | 199  | 2002 | 0.767268 | 0.991945 |
| GO:003563purine riF | 5  | 63 | 199  | 2002 | 0.767268 | 0.991945 |
| GO:004316anion binF | 9  | 63 | 340  | 2002 | 0.768466 | 0.991945 |
| GO:001963organophoP | 2  | 63 | 87   | 2002 | 0.769753 | 0.991945 |
| GO:200002regulatioP | 4  | 63 | 164  | 2002 | 0.773358 | 0.991945 |
| GO:000996regulatioP | 5  | 63 | 202  | 2002 | 0.77893  | 0.991945 |
| GO:004852negative P | 9  | 63 | 344  | 2002 | 0.780992 | 0.991945 |
| GO:000695response P | 12 | 63 | 447  | 2002 | 0.781863 | 0.991945 |
| GO:003122intrinsicC | 7  | 63 | 275  | 2002 | 0.783948 | 0.991945 |
| GO:000971response P | 3  | 63 | 129  | 2002 | 0.784758 | 0.991945 |
| GO:004852positive P | 13 | 63 | 482  | 2002 | 0.785139 | 0.991945 |
| GO:007134cellular P | 2  | 63 | 90   | 2002 | 0.786121 | 0.991945 |
| GO:000989positive P | 5  | 63 | 204  | 2002 | 0.786461 | 0.991945 |
| GO:003198nuclear lC | 5  | 63 | 204  | 2002 | 0.786461 | 0.991945 |
| GO:00517Cmulti-orgP | 9  | 63 | 347  | 2002 | 0.790077 | 0.991945 |

|                     |    |    |      |      |          |          |
|---------------------|----|----|------|------|----------|----------|
| G0:004885anatomicaP | 10 | 63 | 382  | 2002 | 0.79128  | 0.991945 |
| G0:004424cellular P | 4  | 63 | 169  | 2002 | 0.793757 | 0.991945 |
| G0:003109organelleC | 5  | 63 | 207  | 2002 | 0.797397 | 0.991945 |
| G0:004299cell projC | 3  | 63 | 132  | 2002 | 0.798024 | 0.991945 |
| G0:000228neutrophiP | 2  | 63 | 93   | 2002 | 0.801478 | 0.991945 |
| G0:001062positive P | 2  | 63 | 93   | 2002 | 0.801478 | 0.991945 |
| G0:003623granulocyP | 2  | 63 | 93   | 2002 | 0.801478 | 0.991945 |
| G0:004211neutrophiP | 2  | 63 | 93   | 2002 | 0.801478 | 0.991945 |
| G0:004308positive P | 2  | 63 | 93   | 2002 | 0.801478 | 0.991945 |
| G0:004331neutrophiP | 2  | 63 | 93   | 2002 | 0.801478 | 0.991945 |
| G0:000679phosphateP | 4  | 63 | 171  | 2002 | 0.801507 | 0.991945 |
| G0:000715cell adheP | 3  | 63 | 133  | 2002 | 0.802296 | 0.991945 |
| G0:001046gene exprP | 3  | 63 | 133  | 2002 | 0.802296 | 0.991945 |
| G0:002261biologicaP | 3  | 63 | 133  | 2002 | 0.802296 | 0.991945 |
| G0:005117positive P | 4  | 63 | 172  | 2002 | 0.805296 | 0.991945 |
| G0:014035export frP | 4  | 63 | 172  | 2002 | 0.805296 | 0.991945 |
| G0:003019extracellP | 2  | 63 | 94   | 2002 | 0.80638  | 0.991945 |
| G0:003132positive P | 2  | 63 | 94   | 2002 | 0.80638  | 0.991945 |
| G0:004306extracellP | 2  | 63 | 94   | 2002 | 0.80638  | 0.991945 |
| G0:004329leukocyteP | 2  | 63 | 94   | 2002 | 0.80638  | 0.991945 |
| G0:004322membrane-C | 26 | 63 | 918  | 2002 | 0.807679 | 0.991945 |
| G0:004323intracellC | 19 | 63 | 691  | 2002 | 0.80796  | 0.991945 |
| G0:19017Cresponse P | 3  | 63 | 135  | 2002 | 0.810619 | 0.991945 |
| G0:000227myeloid cP | 2  | 63 | 95   | 2002 | 0.811177 | 0.991945 |
| G0:000244neutrophiP | 2  | 63 | 95   | 2002 | 0.811177 | 0.991945 |
| G0:007194cell periC | 17 | 63 | 627  | 2002 | 0.81282  | 0.991945 |
| G0:004259homeostatP | 3  | 63 | 136  | 2002 | 0.814671 | 0.991945 |
| G0:003409response P | 2  | 63 | 96   | 2002 | 0.815869 | 0.991945 |
| G0:000565nucleoplaC | 4  | 63 | 175  | 2002 | 0.81632  | 0.991945 |
| G0:000552ATP bindiF | 3  | 63 | 137  | 2002 | 0.818651 | 0.991945 |
| G0:00068Cnitrogen P | 17 | 63 | 630  | 2002 | 0.819651 | 0.991945 |
| G0:000814drug bindF | 4  | 63 | 176  | 2002 | 0.819883 | 0.991945 |
| G0:000989positive P | 2  | 63 | 97   | 2002 | 0.820459 | 0.991945 |
| G0:004423cellular P | 17 | 63 | 631  | 2002 | 0.821891 | 0.991945 |
| G0:00469CintracellP | 3  | 63 | 138  | 2002 | 0.82256  | 0.991945 |
| G0:001619vesicle-mP | 14 | 63 | 531  | 2002 | 0.823327 | 0.991945 |
| G0:000244myeloid lP | 2  | 63 | 98   | 2002 | 0.824949 | 0.991945 |
| G0:000727multicellP | 9  | 63 | 360  | 2002 | 0.826406 | 0.991945 |
| G0:000236leukocyteP | 2  | 63 | 99   | 2002 | 0.829339 | 0.991945 |
| G0:000996negative P | 2  | 63 | 99   | 2002 | 0.829339 | 0.991945 |
| G0:004869generatioP | 2  | 63 | 99   | 2002 | 0.829339 | 0.991945 |
| G0:000226cell actiP | 2  | 63 | 100  | 2002 | 0.833632 | 0.991945 |
| G0:000695immune reP | 13 | 63 | 502  | 2002 | 0.834754 | 0.991945 |
| G0:000679phosphoruP | 4  | 63 | 181  | 2002 | 0.836876 | 0.991945 |
| G0:005164cellular P | 4  | 63 | 181  | 2002 | 0.836876 | 0.991945 |
| G0:000227myeloid lP | 2  | 63 | 101  | 2002 | 0.837829 | 0.991945 |
| G0:004873system deP | 8  | 63 | 329  | 2002 | 0.837966 | 0.991945 |
| G0:00650CbiologicaP | 32 | 63 | 1123 | 2002 | 0.839022 | 0.991945 |
| G0:001981immunolocC | 6  | 63 | 257  | 2002 | 0.839354 | 0.991945 |
| G0:004249response P | 2  | 63 | 102  | 2002 | 0.841932 | 0.991945 |
| G0:000681transportP | 20 | 63 | 741  | 2002 | 0.844411 | 0.991945 |

|                     |    |    |      |      |          |          |
|---------------------|----|----|------|------|----------|----------|
| G0:001064negative P | 2  | 63 | 103  | 2002 | 0.845943 | 0.991945 |
| G0:002305negative P | 2  | 63 | 103  | 2002 | 0.845943 | 0.991945 |
| G0:005109positive P | 2  | 63 | 103  | 2002 | 0.845943 | 0.991945 |
| G0:003016regulatioP | 2  | 63 | 104  | 2002 | 0.849863 | 0.991945 |
| G0:005078regulatioP | 30 | 63 | 1066 | 2002 | 0.850334 | 0.991945 |
| G0:000177cell actiP | 3  | 63 | 146  | 2002 | 0.851375 | 0.991945 |
| G0:000237immune syP | 15 | 63 | 578  | 2002 | 0.851836 | 0.991945 |
| G0:003555intracellP | 2  | 63 | 105  | 2002 | 0.853694 | 0.991945 |
| G0:009858bounding C | 3  | 63 | 147  | 2002 | 0.854682 | 0.991945 |
| G0:190157organic sP | 4  | 63 | 187  | 2002 | 0.855527 | 0.991945 |
| G0:005123establishP | 20 | 63 | 748  | 2002 | 0.857811 | 0.991945 |
| G0:000573cytoplasmC | 25 | 63 | 911  | 2002 | 0.858181 | 0.991945 |
| G0:005117localizatP | 22 | 63 | 814  | 2002 | 0.858587 | 0.991945 |
| G0:000193regulatioP | 2  | 63 | 107  | 2002 | 0.861095 | 0.992559 |
| G0:007006extracellC | 12 | 63 | 481  | 2002 | 0.863384 | 0.992559 |
| G0:000651peptide mP | 2  | 63 | 108  | 2002 | 0.864668 | 0.992559 |
| G0:190356extracellC | 12 | 63 | 483  | 2002 | 0.867358 | 0.992559 |
| G0:004409positive P | 2  | 63 | 109  | 2002 | 0.868158 | 0.992559 |
| G0:004323extracellC | 12 | 63 | 484  | 2002 | 0.869312 | 0.992559 |
| G0:003250developmeP | 10 | 63 | 414  | 2002 | 0.869617 | 0.992559 |
| G0:001953protein mP | 11 | 63 | 450  | 2002 | 0.871113 | 0.992559 |
| G0:001003response P | 6  | 63 | 271  | 2002 | 0.875036 | 0.994629 |
| G0:000739nervous sP | 3  | 63 | 154  | 2002 | 0.876117 | 0.994629 |
| G0:005124negative P | 2  | 63 | 112  | 2002 | 0.878148 | 0.994629 |
| G0:004317macromoleP | 13 | 63 | 524  | 2002 | 0.879266 | 0.994629 |
| G0:004232regulatioP | 2  | 63 | 114  | 2002 | 0.884423 | 0.994629 |
| G0:000562cell C     | 2  | 63 | 114  | 2002 | 0.884423 | 0.994629 |
| G0:009880whole memC | 2  | 63 | 114  | 2002 | 0.884423 | 0.994629 |
| G0:002200neurogeneP | 2  | 63 | 115  | 2002 | 0.887449 | 0.994629 |
| G0:002260regulatioP | 2  | 63 | 116  | 2002 | 0.890403 | 0.994629 |
| G0:000998cellular P | 41 | 63 | 1426 | 2002 | 0.890447 | 0.994629 |
| G0:000562intracellC | 28 | 63 | 1028 | 2002 | 0.892949 | 0.994629 |
| G0:004427cellular P | 3  | 63 | 161  | 2002 | 0.894762 | 0.994629 |
| G0:004212regulatioP | 2  | 63 | 118  | 2002 | 0.8961   | 0.994629 |
| G0:004360cellular P | 2  | 63 | 119  | 2002 | 0.898846 | 0.994629 |
| G0:190156organonitP | 14 | 63 | 571  | 2002 | 0.899908 | 0.994629 |
| G0:004532leukocyteP | 2  | 63 | 120  | 2002 | 0.901526 | 0.994629 |
| G0:004426cellular P | 7  | 63 | 322  | 2002 | 0.902401 | 0.994629 |
| G0:003139regulatioP | 2  | 63 | 121  | 2002 | 0.90414  | 0.994629 |
| G0:004851negative P | 9  | 63 | 398  | 2002 | 0.906012 | 0.994629 |
| G0:003294secretionP | 3  | 63 | 168  | 2002 | 0.910901 | 0.994629 |
| G0:001922regulatioP | 2  | 63 | 128  | 2002 | 0.920733 | 0.994629 |
| G0:003461cellular P | 2  | 63 | 128  | 2002 | 0.920733 | 0.994629 |
| G0:007072cellular P | 2  | 63 | 128  | 2002 | 0.920733 | 0.994629 |
| G0:004280identicalF | 3  | 63 | 173  | 2002 | 0.921046 | 0.994629 |
| G0:000815metabolicP | 20 | 63 | 790  | 2002 | 0.921401 | 0.994629 |
| G0:005117regulatioP | 2  | 63 | 129  | 2002 | 0.922874 | 0.994629 |
| G0:003226regulatioP | 4  | 63 | 217  | 2002 | 0.924206 | 0.994629 |
| G0:004222response P | 8  | 63 | 374  | 2002 | 0.925388 | 0.994629 |
| G0:004690secretionP | 3  | 63 | 176  | 2002 | 0.926626 | 0.994629 |
| G0:005133regulatioP | 2  | 63 | 131  | 2002 | 0.926997 | 0.994629 |

|                     |    |    |      |      |          |          |
|---------------------|----|----|------|------|----------|----------|
| GO:000905catabolicP | 4  | 63 | 219  | 2002 | 0.927549 | 0.994629 |
| GO:004423primary mP | 16 | 63 | 663  | 2002 | 0.930422 | 0.994629 |
| GO:000237immunogloP | 2  | 63 | 133  | 2002 | 0.930916 | 0.994629 |
| GO:000244productioP | 2  | 63 | 134  | 2002 | 0.932801 | 0.994629 |
| GO:001583peptide tP | 2  | 63 | 134  | 2002 | 0.932801 | 0.994629 |
| GO:001602membrane C | 24 | 63 | 932  | 2002 | 0.933418 | 0.994629 |
| GO:004288amide traP | 2  | 63 | 136  | 2002 | 0.936429 | 0.994629 |
| GO:000557extracellC | 27 | 63 | 1032 | 2002 | 0.937183 | 0.994629 |
| GO:000716signal trP | 14 | 63 | 604  | 2002 | 0.941219 | 0.994629 |
| GO:007256blood micC | 2  | 63 | 140  | 2002 | 0.943144 | 0.994629 |
| GO:00650CregulatioP | 4  | 63 | 230  | 2002 | 0.94372  | 0.994629 |
| GO:004505regulatedP | 2  | 63 | 141  | 2002 | 0.944716 | 0.994629 |
| GO:005124regulatioP | 4  | 63 | 233  | 2002 | 0.947532 | 0.994629 |
| GO:00717Corganic sP | 17 | 63 | 715  | 2002 | 0.9481   | 0.994629 |
| GO:000688exocytosiP | 2  | 63 | 146  | 2002 | 0.951986 | 0.994629 |
| GO:003014secretoryC | 2  | 63 | 147  | 2002 | 0.953329 | 0.994629 |
| GO:000561extracellC | 21 | 63 | 857  | 2002 | 0.954338 | 0.994629 |
| GO:002305signalingP | 14 | 63 | 620  | 2002 | 0.955511 | 0.994629 |
| GO:00717Cnitrogen P | 2  | 63 | 149  | 2002 | 0.955908 | 0.994629 |
| GO:00051CsignalingF | 5  | 63 | 283  | 2002 | 0.95649  | 0.994629 |
| GO:00995CsecretoryC | 2  | 63 | 151  | 2002 | 0.958353 | 0.994629 |
| GO:000372RNA bindiF | 2  | 63 | 152  | 2002 | 0.959527 | 0.994629 |
| GO:00650CregulatioP | 7  | 63 | 368  | 2002 | 0.960634 | 0.994629 |
| GO:190113carbohydrP | 2  | 63 | 153  | 2002 | 0.96067  | 0.994629 |
| GO:000715cell commP | 14 | 63 | 627  | 2002 | 0.96078  | 0.994629 |
| GO:005171cellular P | 17 | 63 | 734  | 2002 | 0.962672 | 0.994629 |
| GO:005079regulatioP | 3  | 63 | 204  | 2002 | 0.963925 | 0.994629 |
| GO:005079regulatioP | 24 | 63 | 969  | 2002 | 0.964012 | 0.994629 |
| GO:000579Golgi appC | 2  | 63 | 157  | 2002 | 0.964945 | 0.994629 |
| GO:004426cellular P | 7  | 63 | 378  | 2002 | 0.96819  | 0.994629 |
| GO:005089response P | 24 | 63 | 976  | 2002 | 0.96824  | 0.994629 |
| GO:006202collagen-C | 2  | 63 | 162  | 2002 | 0.969673 | 0.994629 |
| GO:011016cellular C | 48 | 63 | 1690 | 2002 | 0.972392 | 0.994629 |
| GO:00081Cprotein lP | 2  | 63 | 167  | 2002 | 0.973794 | 0.994629 |
| GO:001674transferaF | 2  | 63 | 168  | 2002 | 0.974552 | 0.994629 |
| GO:000965anatomicaP | 2  | 63 | 174  | 2002 | 0.978679 | 0.994629 |
| GO:00717Corganic sP | 2  | 63 | 178  | 2002 | 0.981068 | 0.994629 |
| GO:003101extracellC | 2  | 63 | 188  | 2002 | 0.985975 | 0.994629 |
| GO:000578endoplasmC | 2  | 63 | 192  | 2002 | 0.987575 | 0.994629 |
| GO:004424cellular P | 3  | 63 | 245  | 2002 | 0.988166 | 0.994629 |
| GO:003197membrane-C | 6  | 63 | 382  | 2002 | 0.988729 | 0.994629 |
| GO:004323organelleC | 6  | 63 | 382  | 2002 | 0.988729 | 0.994629 |
| GO:007001intracellC | 6  | 63 | 382  | 2002 | 0.988729 | 0.994629 |
| GO:007131cellular P | 2  | 63 | 196  | 2002 | 0.989    | 0.994629 |
| GO:003303macromoleP | 2  | 63 | 197  | 2002 | 0.989331 | 0.994629 |
| GO:190156organonitP | 2  | 63 | 199  | 2002 | 0.989964 | 0.994629 |
| GO:007088cellular P | 3  | 63 | 256  | 2002 | 0.991343 | 0.994629 |
| GO:004428small molP | 2  | 63 | 208  | 2002 | 0.992395 | 0.994629 |
| GO:00125CendomembrC | 7  | 63 | 441  | 2002 | 0.992633 | 0.994629 |
| GO:190157organic sP | 3  | 63 | 264  | 2002 | 0.993127 | 0.994629 |
| GO:000905biosyntheP | 3  | 63 | 273  | 2002 | 0.994716 | 0.994716 |

Protein info

P35527, H6VRF8, P35908, P13647, P13645  
P13647, P13645, P35908, P35527  
P54851, P45378, Q9UKX2, Q14324, P02585  
P35527, P13647, P13645, P35908  
P54851, P45378, Q9UKX2, Q14324, P02585  
P35527, P13647, P13645, P35908, H6VRF8  
P35908, P13647, P13645, P35527  
P35527, P13647, P13645, P35908  
Q8IUX7, Q9HBA0, Q9UKX2  
P02585, P45378, Q14324, Q9UKX2  
P02585, Q14324, Q9UKX2, P45378  
P13647, P35908, H6VRF8  
P35908, P13645  
P45378, P13647, H6VRF8, P35908, P35527, Q9HBA0, P13645, Q9UKX2, Q14324, P02585  
H6VRF8, P35908, P13647, P45378, P35527, P13645, Q9HBA0, Q9UKX2, Q14324, P02585  
B4E3L5, Q8IUX7, Q99592  
Q14324, Q9UKX2, Q9HBA0, P13645, P02585, P35908, H6VRF8, P45378, P13647, P35527  
P13647, P13645, P35908, P35527  
P35908, P13645, P13647, P35527  
P35908, P35527  
P13645, P35908  
P13645, P35908  
Q71UI9, Q9HBA0, Q99592, P58215, Q8IUX7  
Q9HBA0, Q71UI9, Q8IUX7, P58215, Q99592  
Q9HBA0, Q71UI9, Q8IUX7, P58215, Q99592  
Q8IUX7, P58215, Q99592, Q9HBA0, Q71UI9  
P54851, P58215  
P02585, P45378  
Q9UKX2, Q14324  
AOA1BOGVN9, P48163  
P35908, H6VRF8, P13645, P13647, Q9HBA0, P35527  
P02585, P45378, Q9HBA0, A4D2P0, Q9UKX2, Q14324, P54851  
Q8IUX7, Q99592, P58215, Q9HBA0, Q71UI9  
A4D2P0, Q08722  
P35908, P13645  
Q6PKX1, Q08722  
Q6PKX1, Q08722  
P54851, P58215  
Q8IUX7, Q075976  
Q9UKX2, Q14324, P45378, P02585  
P02585, P45378  
Q6PKX1, Q08722  
Q9HBA0, Q08722  
P35527, P35908  
P35527, P35908  
Q9HBA0, Q71UI9, Q8IUX7, P58215, Q99592  
P35908, P54851, A4D2P0, P45378, Q9HBA0, P35527, P58215  
P02585, P45378, Q14324, Q9UKX2  
Q99592, A8K7Q1, P58215, B2R7L2, O00487, D6RJI3, H3BPK4, P02585, C9JFR7, P48163, Q  
Q9HBA0, Q8IUX7, Q99592

B4E3L5, Q99592, Q8IUX7  
P45378, P02585  
P02585, P45378  
P48163, AOA1BOGVN9  
P05496, B7Z7F6, Q9HBA0  
Q9HBA0, B7Z7F6, P05496  
Q71UI9, Q9HBA0, P58215, Q99592, Q8IUX7  
A4D2P0, Q08722  
Q99592, D6RFNO  
Q99592, A8K7Q1, P58215, B2R7L2, 000487, D6RJI3, H3BPK4, P02585, C9JFR7, P48163, E  
P13645, P13647, P35908, P54851, P35527  
Q8IUX7, P58215, Q99592, Q9HBA0, Q71UI9  
Q8IUX7, 075976  
P35908, P13645, P13647, P35527  
AOA494COB4, B4E3L5, Q71UI9, Q8IUX7, Q99592  
Q8IUX7, 075976  
P54707, Q13438, B7Z7F6, Q9HBA0, 000487, P05496  
P05496, Q9HBA0, P54707  
AOA494COB4, 000487, Q99592  
P54851, P35908  
P54851, P35908  
A4D2P0, Q08722  
P02585, P45378  
P45378, P02585  
Q99592, Q8IUX7  
Q9HBA0, P05496  
P05496, P54707  
P35908, P54851, A4D2P0, Q9HBA0, P13647, P45378, P35527  
Q8IUX7, P58215, Q99592, Q9HBA0, Q71UI9  
000487, Q13438, AOA494COB4  
P05496, Q9HBA0, P54707  
000487, Q13438  
P35908, P54851  
P54707, P05496  
C9JFR7, P48163  
P02585, Q9NQ79, Q53R15, B2R7L2, Q6P528, A8K7Q1, H3BPK4, D6RJI3, P45378  
P05496, Q9HBA0, P54707  
P54851, Q6PKX1  
P35908, P13645  
C9JFR7, P48163  
Q08722, Q9HBA0  
Q13438, 000487  
Q6PKX1, Q8IUX7, Q08722, Q9HBA0  
Q9HBA0, P54707, P05496  
H6VRF8, P35908, P13647, P45378, P35527, Q9HBA0, P13645, Q9UKX2, P02585  
Q6PKX1, P58215, P54851, Q9HBA0, Q08722  
000487, AOA494COB4, Q13438  
Q08722, Q9HBA0, P58215  
P05496, P54707, Q9HBA0  
P02585, P45378, Q9UKX2  
P02585, P45378

Q9NQ79, Q9HBA0  
P54707, Q9HBA0  
P35908, P13647, P35527  
Q08722, P58215  
P45378, P02585  
Q9HBA0, Q9NQ79  
Q8IUX7, 000487, 075976  
P35527, P58215, P13645, P13647, P35908  
Q9HBA0, P45378, P54851  
Q6IAT9, A0A494COB4, Q13438, 000487  
Q9HBA0, P58215  
P45378, Q9HBA0, P54851  
P13647, P13645, P35908, P35527  
A4D2P0, Q08722  
P58215, Q08722  
Q99592, Q71UI9  
P54851, Q9HBA0  
D6RFN0, Q99592  
P45378, P02585  
P02585, P45378, Q9UKX2  
P54707, Q9HBA0, P05496  
P05496, P54707, B7Z7F6, Q9HBA0  
P02585, P54851, P45378, Q9HBA0, Q14324, Q9UKX2  
A0A5C2GA04, P02585, Q14324, Q9UKX2, A0A5C2GED2, A0A5C2FYV4, A0A5C2GXC2, A4D2P0, A  
P02585, P45378, Q9UKX2  
P58215, Q99592, Q8IUX7, B4E3L5, 000487, Q71UI9, Q9HBA0  
Q8IUX7, P58215, Q99592, Q9HBA0, Q71UI9  
P02585, Q14324, Q9UKX2, P45378, Q9HBA0  
000487, Q13438, A0A494COB4, Q6IAT9  
A0A494COB4, 000487  
P05496, P54707  
P58215, Q08722  
Q13438, 000487  
Q9HBA0, Q9NQ79  
P05496, Q9HBA0  
P05496, P54707  
P58215, Q99592, Q8IUX7, B4E3L5, 000487, Q71UI9, Q9HBA0  
Q9HBA0, B4E3L5, 000487, Q71UI9, Q8IUX7, P58215, Q99592  
Q8IUX7, Q6IAT9, A0A494COB4, 000487, 075976, A0A087WUR8, Q13438, A0A172Q3A0  
P13647, Q9HBA0  
A4D2P0, Q9HBA0  
P45378, P02585  
Q99592, Q8IUX7  
A0A494COB4, Q13438, 000487  
Q13438, A0A494COB4, 000487  
A0A494COB4, Q13438, 000487  
P02585, P54851, P45378  
A4D2P0, B4E3L5, Q71UI9, 000487, P58215, Q99592, Q9HBA0, Q08722, Q8IUX7  
Q9HBA0, Q8IUX7, A4D2P0, B4E3L5, Q71UI9, 000487, P58215, Q99592  
P54851, P35908  
075976, Q8IUX7

Q9HBA0, P13647  
A4D2P0, Q08722  
A4D2P0, P54851, P35908  
Q8IUX7, 075976, 000487, A0A087WUR8, Q6IAT9, A0A172Q3A0  
Q9HBA0, A4D2P0  
A4D2P0, Q9HBA0  
Q9HBA0, A4D2P0  
Q08722, 000487  
P13645, Q71UI9  
P50502, Q6P528, 000487, P54851, Q8IUX7, P02585, Q9UKX2, Q9HBA0  
Q08722, 000487  
Q9HBA0, P54851  
Q6P528, Q8IUX7  
Q8IUX7, Q6IAT9, A0A172Q3A0, 000487, 075976, A0A087WUR8  
Q13438, Q6IAT9, A0A494COB4, 000487  
E9M263, P54707, Q9HBA0, B7Z7F6, P05496  
Q08722, Q9HBA0, 000487  
P05496, P54707, Q9HBA0  
000487, Q71UI9, B4E3L5, A4D2P0, Q99592, P58215, Q9HBA0, Q08722, Q8IUX7  
Q99592, P58215, A4D2P0, Q71UI9, 000487, B4E3L5, Q8IUX7, Q9HBA0  
B4E3L5, 000487, Q71UI9, Q9HBA0, P58215, Q99592, Q8IUX7  
Q9HBA0, P54707, P05496  
A8K7Q1, Q99592, P50502, P58215, B2R7L2, A0A024R1U4, A8K5T0, 000487, H3BPK4, D6RJI  
P02585, Q9UKX2, Q14324, Q9HBA0, P45378, P35908  
Q9HBA0, A4D2P0, P54851  
P45378, Q9HBA0, A4D2P0, P54851  
P54851, A4D2P0, Q9HBA0  
A0A024R1U4, 043263, G3V357, A4D2P0, A0A0G2JLB3, P45378, A0A172Q3A0, 000487, 07597  
P54707, Q9HBA0, P05496  
C9JFR7, Q9UKX2, A0A024R1U4, Q99592, G3V357, P50502, A4D2P0, Q71UI9, B4E3L5, E9M26  
A0A087WUR8, 075976, A0A172Q3A0  
A0A087WUR8, 075976, A0A172Q3A0  
A0A172Q3A0, 075976, A0A087WUR8  
Q08722, Q9HBA0  
Q8IUX7, 075976  
Q9UKX2, Q9HBA0, P02585  
P13645, Q71UI9, B4E3L5, P50502  
Q9HBA0, B4E3L5, Q71UI9, 000487, Q8IUX7, P58215, Q99592  
A0A494COB4, 000487  
Q8IUX7, 075976  
Q08722, Q9HBA0  
A4D2P0, Q9HBA0  
P45378, Q9HBA0, Q9UKX2, P02585  
Q9UKX2, C9JFR7, Q71UI9, B4E3L5, A4D2P0, G3V357, Q99592, P50502, A0A024R1U4, A0A49  
P48163, P05496  
Q9HBA0, A4D2P0  
A4D2P0, Q9HBA0  
P05496, P48163  
P48163, A0A1BOGVN9  
A4D2P0, Q13438, Q9HBA0  
P05496, Q9HBA0, Q71UI9, P35908, P54851, A4D2P0, P45378, P13647, P35527



Q9HBA0, A4D2P0, P54851  
P58215, Q9HBA0  
000487, Q13438  
Q13438, 000487  
Q9HBA0, A4D2P0  
C9JFR7, E9M263  
C9JFR7, E9M263  
AOA5C2GMH6, AOA5C2GAR1, AOA5C2GXC2, P58215, A8K5T0, AOA5C2FYV4, AOA5C2GED2, Q0872  
P58215, P35527, Q99592, P35908, Q9HBA0, P13647, P13645  
Q13438, Q9HBA0, A4D2P0  
Q9HBA0, Q08722  
Q9HBA0, A4D2P0  
Q9HBA0, P54707  
000487, Q13438  
000487, Q6IAT9  
000487, Q6IAT9  
P54707, Q08722, Q9HBA0  
AOA5C2GF02, AOA5C2GA04, AOA5C2GFF7, Q9UKX2, AOA5C2GED2, AOA5C2FYV4, AOA5C2GAR1, A  
P58215, AOA5C2GMH6, AOA5C2G830, Q08722, AOA5C2GXC2, AOA5C2GED2  
Q8IUX7, Q99592, Q9HBA0, 000487  
000487, Q13438, Q6IAT9, AOA494COB4  
Q13438, Q9HBA0, A4D2P0  
Q9HBA0, A4D2P0  
000487, Q6IAT9  
AOA5C2GED2, AOA5C2GMH6, Q08722, AOA5C2G830, AOA5C2GXC2, P58215  
Q6PKX1, Q08722, Q9HBA0  
P02585, Q9HBA0, P13645, Q9UKX2, P35527, Q99592, P45378, P13647, H6VRF8, Q71UI9, P  
Q9UKX2, Q9HBA0, P13645, P02585, P35908, Q71UI9, H6VRF8, P13647, P45378, Q99592, P  
Q9HBA0, A4D2P0  
Q08722, Q13438  
C9JFR7, P48163, P05496  
A4D2P0, Q9HBA0  
P50502, Q9HBA0  
AOA5C2GED2, Q08722, AOA5C2GFF7, AOA5C2GF02, AOA5C2GA04, P35908, P54851, AOA5C2GAR  
000487, Q9HBA0, Q08722  
000487, Q9HBA0, Q08722  
Q14324, P13645, P13647, P35908, Q8IUX7, Q9NR99, P35527  
AOA5C2GFF7, AOA5C2GA04, AOA5C2GF02, AOA5C2GED2, Q08722, AOA5C2FYV4, AOA5C2GXC2, A  
Q9HBA0, A4D2P0  
000487, Q13438, Q9HBA0, AOA494COB4, Q99592  
043263, G3V357, AOA494COB4, 000487  
AOA5C2GXC2, AOA5C2G830, Q08722, AOA5C2GMH6, AOA5C2GED2, P58215  
Q8IUX7, AOA494COB4, 043263, Q99592, G3V357, Q71UI9, B4E3L5, G3V4C1  
AOA5C2GAR1, AOA5C2GMH6, AOA5C2GXC2, AOA5C2FYV4, AOA5C2GED2, Q9UKX2, AOA5C2GFF7, A  
AOA5C2GMH6, AOA5C2GAR1, AOA5C2GXC2, AOA5C2FYV4, Q9UKX2, AOA5C2GED2, AOA5C2GF02, A  
AOA5C2GXC2, AOA5C2GAR1, AOA5C2GMH6, AOA5C2FYV4, AOA5C2GED2, Q9UKX2, AOA5C2GFF7, A  
AOA5C2GAR1, AOA5C2GMH6, AOA5C2GXC2, AOA5C2FYV4, Q9UKX2, AOA5C2GED2, AOA5C2GF02, A  
P58215, 000487  
Q9HBA0, Q9NQ79  
P54851, P35908, AOA5C2GXC2, AOA5C2GAR1, AOA5C2GMH6, A4D2P0, AOA5C2FYV4, AOA5C2GED  
AOA5C2FYV4, P35908, P54851, AOA5C2GMH6, A4D2P0, AOA5C2GAR1, AOA5C2GXC2, AOA5C2GFF

Q08722, AOA5C2G830, Q9HBA0, AOA5C2GFF7, AOA5C2GF02, P54851, AOA5C2GMH6, AOA5C2GED  
Q9HBA0, Q08722, AOA5C2G830, P13645, AOA5C2GED2, AOA5C2GMH6, AOA5C2GXC2, P54851  
P05496, P48163, AOA1BOGVN9  
P54707, Q9HBA0, Q08722  
Q71UI9, Q9HBA0, Q13438, Q99592, P58215, Q8IUX7  
P02585, E9M263, P13645, Q9UKX2, Q6IAT9, Q14324, P35527, P50502, P48163, P54851, O  
P58215, Q08722  
Q6PKX1, P54851  
Q13438, Q9HBA0  
P05496, P48163  
Q6PKX1, P60827, Q9HBA0  
Q8IUX7, P48163, P58215, 075976  
000487, AOA5C2GAR1, AOA5C2GMH6, AOA5C2GXC2, AOA5C2FYV4, AOA5C2GED2, AOA5C2GFF7, A  
P13645, Q6IAT9, Q8IUX7, P13647, B4E3L5, P54851, 000487, P35908, Q71UI9, P58215, P  
P48163, AOA1BOGVN9, P05496  
000487, Q13438  
043263, P48163, G3V357, AOA1BOGVN9, AOA494COB4, 000487, P05496  
Q9UKX2, Q9HBA0, AOA5C2G830, Q08722, AOA5C2GED2, AOA5C2GF02, AOA5C2GA04, AOA5C2GFF  
AOA5C2G830, Q08722, Q9UKX2, AOA5C2GED2, AOA5C2GA04, AOA5C2GF02, AOA5C2GFF7, AOA5C  
P60827, Q9HBA0, P54851, Q6PKX1  
Q6PKX1, P60827, Q9HBA0  
Q9HBA0, P54707, P54851  
Q6PKX1, Q08722  
Q71UI9, Q99592  
000487, Q13438, AOA494COB4, Q6IAT9  
P45378, A4D2P0, Q9UKX2, AOA024R1U4  
AOA5C2GMH6, AOA5C2GAR1, AOA5C2GXC2, AOA5C2FYV4, AOA5C2GED2, Q9UKX2, Q08722, AOA5C  
AOA5C2GMH6, AOA5C2GAR1, AOA5C2GXC2, 000487, AOA5C2FYV4, Q9UKX2, AOA5C2G830, AOA5C  
AOA5C2FYV4, AOA5C2GXC2, AOA5C2GMH6, AOA5C2GAR1, 000487, AOA5C2GA04, AOA5C2GF02, A  
P54851, 000487, Q9HBA0, A4D2P0, P58215  
AOA5C2GMH6, AOA5C2G830, AOA5C2GXC2, Q08722, AOA5C2GED2  
Q6PKX1, Q9HBA0, P60827  
P54851, Q08722  
AOA087WUR8, AOA172Q3A0  
P58215, 000487, P54851, A4D2P0, Q9HBA0  
AOA5C2GED2, AOA5C2GMH6, AOA5C2G830, AOA5C2GXC2, Q08722  
P60827, Q9HBA0, P54851, Q6PKX1  
P05496, 000487, AOA494COB4, AOA1BOGVN9, G3V357, P48163, 043263  
P58215, AOA5C2FYV4, A8K5T0, 000487, AOA5C2GXC2, AOA5C2GMH6, AOA5C2GAR1, AOA5C2GFF  
AOA5C2GED2, AOA5C2GMH6, Q08722, AOA5C2G830, AOA5C2GXC2  
AOA1BOGVN9, P48163, P05496  
Q6IAT9, Q13438, 000487  
AOA024R1U4, Q9UKX2, A4D2P0, P45378  
Q9UKX2, A4D2P0, P45378, AOA024R1U4  
AOA024R1U4, P45378, A4D2P0, Q9UKX2  
Q71UI9, Q13438, Q9HBA0, Q99592, P58215, Q8IUX7  
Q9HBA0, P54707  
Q9HBA0, Q08722  
Q08722, Q9HBA0  
AOA5C2FYV4, AOA5C2GXC2, AOA5C2GMH6, AOA5C2GAR1, 000487, AOA5C2GA04, AOA5C2GF02, A  
AOA5C2G830, Q9UKX2, AOA5C2GED2, AOA5C2GA04, AOA5C2GF02, AOA5C2GFF7, AOA5C2GXC2, A

E9M263, C9JFR7, P48163  
AOA5C2GF02, AOA5C2GA04, AOA5C2GFF7, Q08722, AOA5C2GED2, AOA5C2FYV4, AOA5C2GAR1, A  
AOA5C2GMH6, AOA5C2G830, AOA5C2GXC2, Q9NQ79, AOA5C2GED2  
AOA5C2GXC2, AOA5C2G830, AOA5C2GMH6, 000487, AOA5C2GED2  
Q6PKX1, P54851, Q9HBA0, P60827  
Q8IUX7, AOA1BOGVN9, AOA494COB4, P05496, 043263, G3V357, P48163, 075976, 000487  
A4D2P0, Q9HBA0, Q13438  
AOA5C2G830, Q9NQ79, Q9HBA0, Q08722, P54851, P35908, P45378, AOA5C2GMH6, P35527, P  
AOA494COB4, P05496, 000487, 043263, P48163, G3V357  
AOA5C2GED2, AOA5C2GF02, AOA5C2GA04, AOA5C2GFF7, AOA5C2GAR1, AOA5C2GMH6, AOA5C2GXC  
AOA5C2FYV4, A8K5T0, AOA5C2GXC2, AOA5C2GAR1, AOA5C2GMH6, AOA5C2GA04, AOA5C2GF02, A  
Q9HBA0, P54707  
Q6PKX1, Q08722  
P05496, P54707, Q13438  
000487, AOA5C2GAR1, AOA5C2GMH6, AOA5C2GXC2, A8K5T0, AOA5C2FYV4, AOA5C2GED2, Q9UKX  
P35527, P45378, AOA5C2GMH6, P54851, P35908, Q9HBA0, AOA5C2G830, Q08722, Q9NQ79, P  
P45378, Q99592  
AOA087WUR8, AOA172Q3A0, Q6IAT9  
Q53R15, Q9NQ79, AOA5C2G830, Q8IUX7, AOA5C2GMH6, Q13438, P45378, 075976, G3V4C1, P  
P50502, P48163, AOA024R1U4, Q9HBA0, P54707, Q9UKX2, A4D2P0  
P05496, Q9HBA0, P54707  
A4D2P0, Q9NQ79, Q9HBA0  
Q9HBA0, P54707  
A4D2P0, Q08722  
P54707, Q9HBA0  
Q13438, A4D2P0, B4E3L5, P54851, 000487, Q71UI9, P58215, Q99592, Q08722, Q9HBA0, Q  
P54707, Q9UKX2, Q9HBA0, P50502, P48163  
Q13438, Q9HBA0, Q71UI9, Q8IUX7, P58215, Q99592  
Q08722, Q9HBA0, A4D2P0  
P58215, Q8IUX7, AOA087WUR8, 000487, 075976, AOA172Q3A0, Q6IAT9  
Q9HBA0, A4D2P0  
000487, Q13438, AOA494COB4, Q6IAT9  
B2R7L2, P05496, Q9HBA0  
P48163, G3V357, AOA1BOGVN9, 043263, 000487, P05496, AOA494COB4  
Q08722, Q9HBA0  
Q08722, Q9HBA0  
Q6PKX1, Q08722  
Q9HBA0, P54707  
P50502, AOA5C2G830, Q08722, AOA5C2GXC2, AOA5C2GMH6, AOA5C2GED2  
Q13438, Q9HBA0, Q08722, 000487  
Q13438, A4D2P0  
AOA024R1U4, A4D2P0  
Q8IUX7, P58215, Q99592, Q9HBA0, B4E3L5, Q71UI9, 000487  
AOA5C2GFF7, AOA5C2GA04, AOA5C2GF02, AOA5C2GED2, AOA5C2G830, Q08722, Q9UKX2, AOA5C  
AOA5C2GA04, AOA5C2GF02, AOA5C2GFF7, AOA5C2G830, AOA5C2GED2, AOA5C2FYV4, AOA5C2GXC  
AOA5C2FYV4, P58215, AOA5C2GXC2, AOA5C2GMH6, P54707, AOA5C2GAR1, AOA5C2GA04, AOA5C  
P13647, P35908, P58215, P35527, Q99592, Q9HBA0, P13645, Q9NQ79  
AOA5C2G830, AOA5C2GXC2, AOA5C2GMH6, AOA5C2GED2  
AOA5C2GXC2, AOA5C2G830, AOA5C2GMH6, AOA5C2GED2  
AOA5C2G830, AOA5C2GED2, AOA5C2GF02, AOA5C2GA04, AOA5C2GFF7, AOA5C2GAR1, AOA5C2GMH  
A4D2P0, Q08722, Q6PKX1

P54851, P35527  
Q9HBA0, A4D2P0  
A4D2P0, Q9HBA0  
Q13438, Q08722, Q9HBA0, A4D2P0, P60827, P54851, Q6PKX1  
A8K5T0, AOA5C2FYV4, 000487, AOA5C2GAR1, AOA5C2GMH6, AOA5C2GXC2, AOA5C2GFF7, AOA5C  
AOA5C2GED2, AOA5C2GMH6, AOA5C2GXC2, AOA5C2G830  
AOA5C2GMH6, AOA5C2GXC2, AOA5C2G830, AOA5C2GED2  
AOA5C2GED2, AOA5C2GMH6, AOA5C2GXC2, AOA5C2G830  
P13647, P13645, P45378, Q9HBA0, P54851, P50502  
P05496, P48163  
P48163, P05496  
A4D2P0, Q9HBA0  
Q9HBA0, P54707  
Q9HBA0, P54707  
075976, Q8IUX7  
AOA5C2GMH6, AOA5C2GXC2, AOA5C2G830, AOA5C2GED2  
AOA5C2GF02, AOA5C2GA04, AOA5C2GFF7, AOA5C2GED2, AOA5C2FYV4, AOA5C2GMH6, AOA5C2GAR  
P48163, P05496  
Q9HBA0, Q08722, Q8IUX7, Q13438, A4D2P0, B4E3L5, P54851, 000487, Q71UI9, P58215, Q  
AOA5C2GXC2, AOA5C2G830, AOA5C2GMH6, AOA5C2GED2  
AOA5C2GED2, AOA5C2GMH6, AOA5C2G830, AOA5C2GXC2  
A8K5T0, AOA5C2GED2, AOA5C2GMH6, AOA5C2G830, Q08722, AOA5C2GXC2  
AOA5C2GED2, P54851, P05496, AOA5C2GMH6, AOA5C2G830, AOA5C2GXC2  
P58215, Q9HBA0  
P58215, Q9HBA0, P54851, 000487  
AOA5C2GED2, AOA5C2G830, AOA5C2GXC2, AOA5C2GMH6  
Q9NQ79, Q9HBA0, P13645, P45378, P13647, P35908, P35527, P58215  
AOA5C2GFF7, AOA5C2GF02, AOA5C2GA04, AOA5C2GED2, AOA5C2G830, A8K5T0, AOA5C2FYV4, A  
Q08722, P58215  
P50502, P13647, P13645, P45378, Q9HBA0, P54851  
P05496, P48163, C9JFR7  
Q71UI9, Q13438, Q9HBA0, Q99592, P58215, Q8IUX7  
Q6PKX1, Q9HBA0, P54851  
Q9HBA0, P54707  
Q9UKX2, P54707, A4D2P0, Q9HBA0, AOA024R1U4, P50502, P48163  
Q9UKX2, P54707, A4D2P0, Q9HBA0, P48163, P50502, AOA024R1U4  
Q6PKX1, Q9HBA0  
P35527, P58215, P35908, P45378, P13647, P13645, Q9NQ79, Q9HBA0  
Q13438, 000487  
P54851, A4D2P0  
Q6PKX1, Q08722, Q9HBA0  
A4D2P0, Q08722, Q13438, Q9HBA0  
Q9NQ79, P54851  
C9JFR7, P48163, P58215  
000487, A4D2P0, AOA5C2GAR1, AOA5C2GXC2, Q6PKX1, Q99592, P58215, A8K5T0, AOA5C2FYV  
AOA5C2FYV4, P54851, AOA5C2GMH6, AOA5C2GAR1, AOA5C2GXC2, AOA5C2GFF7, AOA5C2GF02, A  
AOA5C2GXC2, AOA5C2GMH6, AOA5C2GAR1, AOA5C2FYV4, P58215, AOA5C2G830, AOA5C2GED2, A  
P54851, AOA5C2GMH6, Q13438, Q08722, AOA5C2G830, Q9HBA0, AOA5C2GFF7, AOA5C2GF02, O  
Q9UKX2, A4D2P0, P54707, Q9HBA0, P48163, AOA024R1U4  
P48163, AOA024R1U4, Q9UKX2, A4D2P0, P54707, Q9HBA0  
000487, P54851, Q9HBA0, P58215

P54851, Q9NQ79  
AOA024R1U4, A4D2P0  
AOA024R1U4, A4D2P0  
AOA024R1U4, A4D2P0  
AOA024R1U4, A4D2P0  
A4D2P0, AOA024R1U4  
A4D2P0, AOA024R1U4  
AOA024R1U4, A4D2P0  
Q9HBA0, Q08722, Q9NQ79, Q8IUX7, P54851, P35908, 075976, P35527, P13645, Q9NR99, P  
P58215, Q9HBA0, P13645, P54851, P35908, 000487  
AOA5C2GXC2, AOA5C2G830, Q08722, AOA5C2GMH6, AOA5C2GED2, A8K5T0, P50502  
Q08722, AOA5C2G830, AOA5C2GXC2, AOA5C2GMH6, AOA5C2GED2, A8K5T0, P50502  
Q9HBA0, Q08722, Q8IUX7, Q13438, A4D2P0, P54851, B4E3L5, Q71UI9, 000487, P58215, Q  
AOA5C2GMH6, Q08722, AOA5C2G830, AOA5C2GXC2, AOA5C2GED2, A8K5T0, P50502  
Q9HBA0, Q08722, 000487  
AOA5C2GXC2, AOA5C2GMH6, AOA5C2GAR1, AOA5C2FYV4, AOA5C2GED2, AOA5C2G830, AOA5C2GFF  
AOA5C2FYV4, AOA5C2GXC2, AOA5C2GMH6, AOA5C2GAR1, AOA5C2GA04, AOA5C2GF02, AOA5C2GFF  
Q9NQ79, P58215  
Q08722, P54851  
AOA5C2GMH6, AOA5C2GAR1, AOA5C2GXC2, AOA5C2FYV4, AOA5C2GED2, AOA5C2G830, AOA5C2GFF  
AOA5C2G830, AOA5C2GED2, AOA5C2GF02, AOA5C2GA04, AOA5C2GFF7, AOA5C2GMH6, AOA5C2GAR  
AOA5C2GED2, AOA5C2G830, Q08722, AOA5C2GFF7, AOA5C2GA04, AOA5C2GF02, P54851, 00048  
000487, Q9HBA0  
P05496, 000487, B2RD19  
Q9HBA0, P13645, P50502  
Q9UKX2, P54707, Q9HBA0, P48163  
B2RD19, P05496  
P54851, A4D2P0, Q13438, Q9HBA0  
Q9HBA0, Q8IUX7, Q13438, P54851, B4E3L5, 000487, Q71UI9, P58215, Q99592, P48163  
E9M263, AOA5C2G830, Q6IAT9, D6RFN0, Q13438, P45378, AOA5C2GMH6, P54707, AOA5C2GA0  
Q9HBA0, P54851  
000487, Q9HBA0, A4D2P0  
AOA5C2GED2, AOA5C2GMH6, AOA5C2G830, Q08722, AOA5C2GXC2, A8K5T0  
Q9HBA0, Q9NQ79, P13645, Q9UKX2, Q14324, P02585, P54851, P35908, P13647, P45378, A  
AOA5C2GXC2, A4D2P0, AOA5C2GMH6, A8K5T0, P50502, AOA5C2G830, Q08722, Q9HBA0, AOA5C  
Q9HBA0, Q9UKX2, D6RFN0  
Q9NR99, Q8IUX7  
A4D2P0, Q9HBA0, Q08722  
Q13438, 000487  
000487, P54851, A4D2P0, Q9HBA0, Q99592  
Q99592, Q9HBA0, A4D2P0, P54851, 000487  
AOA5C2GFF7, AOA5C2GA04, AOA5C2GF02, AOA5C2GED2, AOA5C2G830, AOA5C2FYV4, A8K5T0, A  
P54851, Q9HBA0  
P58215, A8K5T0, AOA5C2GED2, AOA5C2G830, Q08722, AOA5C2GXC2, AOA5C2GMH6  
Q9HBA0, 000487, P54851  
000487, Q08722, Q13438, P58215  
A4D2P0, Q9HBA0, Q08722, 000487, P54851, P58215  
043263, P48163, P45378, AOA172Q3A0, 075976, AOA087WUR8, Q8IUX7, B2RD19, Q6IAT9, A  
P48163, P05496  
P35527, P54851  
Q9HBA0, Q13438

P54851, P35527  
AOA5C2FYV4, 000487, AOA5C2GXC2, AOA5C2GAR1, AOA5C2GMH6, A4D2P0, AOA5C2GFF7, AOA5C  
AOA5C2GMH6, AOA5C2G830, AOA5C2GXC2, AOA5C2GED2  
P54851, Q9HBA0  
Q13438, A4D2P0, P54851, B4E3L5, 000487, Q71UI9, P58215, Q99592, Q9HBA0, Q8IUX7  
Q9HBA0, Q08722, A4D2P0, P54851, 000487, P58215  
A4D2P0, Q99592  
P58215, P48163, C9JFR7  
Q8IUX7, Q08722, AOA5C2G830, Q9HBA0, Q9NQ79, AOA5C2GMH6, Q13438, P45378, P35908, P  
AOA5C2GMH6, AOA5C2G830, AOA5C2GXC2, AOA5C2GED2  
Q9HBA0, P54851  
D6RFNO, P48163, P35527, P45378, Q13438, P35908, 075976, H6VRF8, P54851, Q8IUX7, Q  
P54851, P05496, 075976, Q9HBA0, B7Z7F6, Q08722, P54707  
P48163, Q9HBA0  
P58215, Q9HBA0  
Q9HBA0, P13645, P50502  
AOA5C2GED2, AOA5C2GMH6, AOA5C2G830, AOA5C2GXC2, AOA5C2GA04, AOA5C2FYV4  
Q9HBA0, 000487, P54851  
Q9HBA0, P54707  
Q9HBA0, Q9UKX2, P54707, A4D2P0, P48163, P50502, A8K5T0, AOA024R1U4  
Q08722, P45378, Q9HBA0, 000487, P54851, P02585, P58215  
P02585, C9JFR7, P05496, P13645, Q9UKX2, P58215, Q99592, AOA024R1U4, B4E3L5, 00048  
Q9NQ79, P45378, P35908  
AOA5C2GXC2, P13647, AOA5C2GAR1, AOA5C2FYV4, P13645, AOA5C2GED2, AOA5C2GA04, P5470  
P54851, Q9HBA0  
P54851, Q9HBA0  
Q13438, Q9HBA0  
E9M263, Q9HBA0, Q9UKX2, P48163, P50502, AOA024R1U4, A4D2P0, P54707  
P58215, P35908, 000487, Q13438, P13645  
000487, P35908, P13645, Q13438, P58215  
000487, P54851, A4D2P0, Q9HBA0, Q08722, AOA024R1U4  
AOA024R1U4, 000487, P54851, A4D2P0, Q08722, Q9HBA0  
AOA5C2GMH6, AOA5C2G830, AOA5C2GXC2, AOA5C2GED2  
Q9NQ79, Q9HBA0, A4D2P0  
P58215, Q13438, P13645, 000487, P35908  
P54707, Q9HBA0  
Q8IUX7, Q6PKX1, A4D2P0, Q08722, Q9HBA0  
Q9UKX2, A4D2P0, P54707, Q9HBA0, AOA024R1U4  
Q9HBA0, Q9UKX2, B2R7L2, P48163, P50502, A8K5T0, AOA024R1U4, P54707, A4D2P0  
P05496, P48163  
P54851, 000487, Q9HBA0, P58215  
P58215, 000487, P54851, Q9HBA0, Q08722  
Q08722, Q9HBA0, Q8IUX7, Q71UI9, 000487, Q13438, P58215, Q99592, P50502  
AOA5C2GED2, Q9HBA0, AOA5C2G830, Q08722, AOA494C0B4, P58215, Q99592, A8K5T0, 00048  
P54707, Q9HBA0, B7Z7F6, Q08722, 075976, P54851, P05496  
Q9NR99, P48163, Q9HBA0  
Q9HBA0, AOA5C2G830, Q08722, P60827, AOA5C2GED2, AOA5C2GXC2, AOA5C2GMH6, A4D2P0, P  
Q08722, 000487  
Q99592, 000487, P54851, A4D2P0, Q9HBA0  
Q6IAT9, Q71UI9, 000487, Q99592, D6RFNO  
Q08722, AOA5C2G830, AOA5C2GED2, AOA5C2GXC2, AOA5C2GMH6, P54851, A8K5T0, P35527, P

P35908, P54851, P45378, P13647, Q99592, P58215, P35527, Q9NQ79, Q9HBA0, P13645  
Q6IAT9, AOA494COB4, Q13438, 000487  
Q13438, Q08722, A4D2P0, P05496, P54851  
A4D2P0, Q9HBA0, Q9NQ79  
Q08722, 000487  
Q99592, Q9HBA0  
Q08722, 000487  
Q08722, 000487  
P54851, 000487  
000487, Q08722  
000487, P05496, P48163, B2RD19  
Q08722, Q14324, P54851  
075976, Q8IUX7, 043263  
P54851, Q14324, Q08722  
Q9HBA0, 000487, P54851, Q99592  
000487, Q9HBA0, Q08722, P54707  
Q08722, P58215  
Q99592, A4D2P0  
Q08722, P58215  
Q08722, 000487  
Q9NR99, C9JFR7, P13645, P05496, AOA024RIU4, A8K5T0, P50502, Q99592, P58215, A4D2P  
P13647, A4D2P0, B4E3L5, Q71UI9, 000487, P58215, Q99592, P13645, P05496, C9JFR7, Q  
P48163, 000487, Q9HBA0  
000487, Q08722  
000487, Q08722  
AOA5C2GA04, P13645, AOA5C2GED2, AOA5C2FYV4, AOA5C2GAR1, P13647, AOA5C2GXC2, AOA5C  
P54707, A4D2P0, Q9HBA0  
Q08722, 000487  
000487, Q6IAT9, Q99592, D6RFN0  
Q9UKX2, P54707, Q9HBA0  
AOA172Q3A0, Q13438, 075976, P35908, AOA087WUR8, 043263, P48163, AOA494COB4, Q6IAT  
Q9HBA0, Q9UKX2, P54707, E9M263  
A4D2P0, Q99592  
AOA1BOGVN9, C9JFR7, P05496, P13645, G3V357, P58215, 000487, AOA0G2JLB3, Q8IUX7, B  
P05496, P54851, Q13438  
AOA5C2GED2, Q9UKX2, Q08722, AOA5C2G830, AOA5C2GFF7, AOA5C2GF02, AOA5C2GA04, 00048  
Q08722, 000487  
P13647, P35908, P54851, Q99592, P58215, P35527, Q9HBA0, Q9NQ79, P13645  
Q08722, 000487  
000487, Q08722  
Q9NQ79, Q9HBA0  
000487, Q08722  
AOA5C2GED2, Q08722, AOA5C2G830, AOA5C2GFF7, AOA5C2GA04, AOA5C2GF02, P54851, 00048  
P48163, B2RD19, P05496, 000487  
Q9HBA0, Q13438, P54851, P05496  
Q08722, 000487  
Q9HBA0, Q9NQ79, P13645, P35527, P58215, Q99592, P13647, P35908  
AOA5C2GXC2, A4D2P0, B4E3L5, Q6PKX1, Q99592, P50502, P60827, AOA5C2GED2, P02585, P  
AOA5C2GED2, AOA5C2G830, AOA5C2GXC2, AOA5C2GMH6, AOA5C2GA04, AOA5C2FYV4  
000487, E9M263  
AOA5C2GFF7, E9M263, AOA5C2GF02, AOA5C2G830, Q9HBA0, Q08722, P54851, P54707, AOA5C

Q08722, 000487  
Q08722, 000487  
P13645, P35908  
000487, Q13438  
P54851, P35908, Q13438, P45378, A0A5C2GMH6, P48163, Q08722, A0A5C2G830, Q9HBA0, A  
000487, P35908, Q08722  
A0A5C2GF02, A0A5C2GA04, A0A5C2GFF7, Q9UKX2, Q08722, A0A5C2G830, A0A5C2GED2, A8K5T  
A4D2P0, 000487  
P54851, Q08722, A4D2P0  
000487, A0A494COB4, Q6IAT9, Q13438  
A0A5C2GFF7, E9M263, A0A5C2GF02, Q9HBA0, A0A5C2G830, Q08722, P54851, Q13438, B7Z7F  
P50502, P58215, A0A024R1U4, 000487, B4E3L5, A4D2P0, P13647, P02585, C9JFR7, P0549  
A0A5C2GA04, Q9UKX2, A0A5C2GED2, P05496, A0A5C2FYV4, P58215, A0A5C2GAR1, A4D2P0, A  
Q9HBA0, P54851  
Q9NR99, Q8IUX7, Q08722, Q9NQ79, P13645, P35527, P50502, A8K5T0, Q71UI9, 075976, P  
Q8IUX7, 075976  
Q08722, P13645, Q9NQ79, Q8IUX7, Q9NR99, 075976, P35908, Q71UI9, P13647, P50502, P  
000487, P54851  
Q8IUX7, Q9NR99, Q9NQ79, Q08722, P13645, P50502, P35527, A8K5T0, Q71UI9, 075976, P  
Q9HBA0, Q9NQ79, P13645, P13647, P45378, P54851, P35908, P58215, P35527, Q99592  
P58215, A0A087WUR8, 075976, P35908, 000487, Q13438, A0A172Q3A0, Q8IUX7, P13645, Q  
Q9NR99, P48163, Q13438, Q08722, Q9HBA0, 000487  
Q9HBA0, Q9NQ79, P58215  
Q9HBA0, P58215  
Q8IUX7, P13645, A0A494COB4, Q6IAT9, 043263, P58215, G3V357, Q13438, A0A172Q3A0, A  
Q9HBA0, P54851  
P54707, Q9HBA0  
Q08722, P54851  
Q9HBA0, Q9NQ79  
P54851, 000487  
Q9NQ79, A0A5C2G830, A0A5C2GFF7, A0A5C2GF02, Q8IUX7, B2RD19, 075976, A0A5C2GMH6, Q  
B4E3L5, Q71UI9, 000487, P13647, A4D2P0, P58215, P50502, Q99592, A0A024R1U4, P0549  
A0A1BOGVN9, P48163, P05496  
P54851, Q08722  
Q8IUX7, 075976  
P58215, A0A0G2JLB3, Q13438, A0A172Q3A0, 075976, P35908, 000487, A0A087WUR8, Q8IUX  
Q08722, 000487  
P58215, P13645, Q13438, A0A494COB4, Q6IAT9, P35908, 000487  
P54851, Q9HBA0  
P58215, P50502, Q99592, Q13438, 000487, Q71UI9, Q8IUX7, Q08722, Q9HBA0  
Q08722, Q9HBA0, 000487  
Q9HBA0, P54851  
P54851, Q13438  
Q13438, P54851  
Q9HBA0, P50502, A8K5T0  
A0A1BOGVN9, C9JFR7, P05496, P13645, G3V357, P58215, 000487, A0A0G2JLB3, Q8IUX7, B  
P54851, Q9HBA0  
P54851, 000487, Q9HBA0, Q13438  
E9M263, Q9NR99, Q9HBA0, Q08722, P48163, 000487, A4D2P0, Q13438  
000487, Q08722, Q9HBA0  
000487, P45378



AOA494COB4, Q6IAT9, Q13438, 000487  
P48163, 043263, 075976, P35908, AOA087WUR8, AOA172Q3A0, Q13438, Q8IUX7, Q6IAT9, A  
AOA5C2FYV4, AOA5C2GA04  
AOA5C2FYV4, AOA5C2GA04  
Q9HBA0, Q13438  
AOA5C2FYV4, P58215, A4D2P0, AOA5C2GAR1, P13647, AOA5C2GXC2, AOA5C2GA04, C9JFR7, P  
Q13438, Q9HBA0  
P35527, AOA024R462, AOA5C2GMH6, P35908, 075976, AOA024R6P0, Q8IUX7, AOA5C2GF02, A  
AOA5C2GF02, AOA5C2GA04, AOA5C2GFF7, Q9UKX2, Q08722, AOA5C2G830, Q9HBA0, AOA5C2GED  
AOA5C2GA04, A8K5T0  
000487, P54851, Q9NQ79, P45378  
Q08722, 000487  
Q9HBA0, Q13438, 000487, P54851  
P05496, P13645, AOA1BOGVN9, 000487, AOA0G2JLB3, P58215, G3V357, Q6IAT9, AOA494COB  
Q08722, 000487  
000487, Q08722  
P13647, AOA5C2GXC2, Q71UI9, AOA5C2FYV4, A8K5T0, P58215, Q6PKX1, P50502, P13645, A  
AOA5C2GFF7, AOA5C2GF02, AOA5C2GA04, AOA5C2GED2, Q9UKX2, Q9HBA0, AOA5C2G830, Q0872  
Q13438, Q9HBA0  
P54851, AOA5C2GED2, AOA5C2GXC2, AOA5C2G830, AOA5C2GMH6  
000487, Q08722  
043263, G3V4C1  
000487, P54851, P54707, A4D2P0, Q13438, Q08722, Q9HBA0  
Q13438, P05496  
000487, AOA5C2GXC2, AOA5C2GAR1, AOA5C2GMH6, A4D2P0, AOA5C2FYV4, AOA5C2GED2, AOA5C  
Q13438, AOA5C2GMH6, AOA5C2G830, Q9HBA0, Q08722, AOA494COB4, AOA5C2GF02, AOA5C2GFF  
000487, P54851, P45378  
B4E3L5, Q71UI9, 000487, AOA5C2GXC2, AOA5C2GAR1, A4D2P0, P58215, P50502, Q99592, Q  
P54851, A4D2P0  
Q6IAT9, AOA494COB4, Q13438, P13645, P35908, 000487, P58215  
AOA5C2GFF7, E9M263, AOA5C2GF02, AOA494COB4, AOA5C2G830, Q08722, Q9HBA0, P48163, P  
Q8IUX7, Q9NR99  
AOA5C2GXC2, A4D2P0, B4E3L5, AOA024R1U4, Q6PKX1, Q99592, P50502, P60827, Q14324, A  
P54851, Q13438  
B2RD19, P05496  
P45378, Q9HBA0  
Q9HBA0, Q13438  
Q9NR99, Q8IUX7  
Q13438, Q9HBA0  
AOA1BOGVN9, P48163, P05496  
000487, Q71UI9, Q6IAT9, Q13438, D6RFN0, Q99592  
D6RFN0, Q99592, Q13438, Q6IAT9, Q71UI9, 000487  
Q6IAT9, Q13438, Q71UI9, 000487, Q99592, D6RFN0  
000487, Q08722  
P54851, Q13438  
P05496, AOA1BOGVN9  
000487, A4D2P0, Q08722  
P48163, P05496  
A4D2P0, Q08722, Q13438, Q9HBA0, 000487, P54851, AOA024R1U4  
AOA1BOGVN9, P48163, P05496  
P05496, P48163, AOA1BOGVN9

6P528, E9PP21, 075976, P54707, P45378, Q8IUX7, Q53R15, Q9HBA0, Q9NQ79

9PP21, Q6P528, 075976, P54707, P45378, Q8IU7, Q53R15, Q9HBA0, Q9NQ79

0A5C2GAR1, A0A5C2GF02, A0A5C2GFF7, Q08722, P45378, A0A5C2GMH6, P54851, P35908

3, A4D2P0, P02585, C9JFR7, Q9UKX2, P48163, E9PP21, Q6P528, 075976, P54707, P45378,

6, A0A087WUR8, Q8IUX7, Q9UKX2, Q6IAT9

3, Q8IUX7, A0A494COB4, Q9HBA0, 043263, P48163, P54707, G3V4C1

4COB4, Q9HBA0, Q8IUX7, E9M263, G3V4C1, P54707, P48163, 043263

2, A0A5C2GFF7, A0A5C2GF02, A0A5C2GA04

0A5C2GMH6, A0A5C2GXC2, 000487

35908  
35527

1, A0A5C2GMH6, A4D2P0, A0A5C2GXC2, A0A5C2FYV4

4D2P0, A0A5C2GMH6, A0A5C2GAR1

0A5C2GF02, A0A5C2GA04  
0A5C2GA04, A0A5C2GFF7  
0A5C2GA04, A0A5C2GF02  
0A5C2GA04, A0A5C2GFF7

2, Q08722, A0A5C2GFF7, A0A5C2GA04, A0A5C2GF02  
7, A0A5C2GF02, A0A5C2GA04, A0A5C2GED2, Q08722

2, Q9UKX2, AOA5C2GA04, 000487, AOA5C2GXC2, A4D2P0, AOA5C2GAR1, P58215, AOA5C2FYV4,

00487, P35908, P13647, P45378, A4D2P0

0A5C2GF02, AOA5C2GA04  
35527, D6RFN0, Q99592

7, AOA5C2GAR1, AOA5C2GMH6, AOA5C2GXC2, 000487, A8K5T0, AOA5C2FYV4  
2GXC2, AOA5C2GMH6, AOA5C2GAR1, 000487, AOA5C2FYV4, A8K5T0, P58215

2G830, AOA5C2GFF7, AOA5C2GF02, AOA5C2GA04  
2GED2, AOA5C2GF02, AOA5C2GA04, AOA5C2GFF7  
0A5C2GFF7, AOA5C2G830, Q9UKX2, AOA5C2GED2

7, AOA5C2GA04, AOA5C2GF02, AOA5C2GED2, AOA5C2G830, Q08722, Q9HBA0, Q9UKX2

0A5C2GFF7, AOA5C2G830, Q9UKX2, AOA5C2GED2  
0A5C2GAR1, AOA5C2GMH6, 000487, AOA5C2FYV4

0A5C2GMH6, A4D2P0, A0A5C2GXC2, P35908, P54851

05496, A0A5C2GED2, P13645, Q71UI9, A0A5C2GXC2, P13647, A4D2P0, P58215, P50502

2, A8K5T0, A0A5C2FYV4  
0A5C2GFF7, A0A5C2GED2

2, A0A5C2G830, A0A5C2GFF7, A0A5C2GF02, A0A5C2GA04  
58215, P50502, P13647, A0A5C2GXC2, A4D2P0, Q71UI9, P13645, P05496, A0A5C2GED2

48163, Q9UKX2, P13645, P05496, A0A5C2GA04, C9JFR7, P13647, Q71UI9, 000487, H3BPK4,

8IUX7

2FYV4, A8K5T0, P54851, 000487, A0A5C2GXC2, A0A5C2GMH6, A0A5C2GAR1  
2, A0A5C2GMH6, A0A5C2GAR1, P54851  
2GF02, A0A5C2GFF7, A0A5C2G830, A0A5C2GED2

6, A0A5C2GXC2, P54851, A0A5C2FYV4



2GF02, A0A5C2GA04, A0A5C2GED2, Q9UKX2, A0A5C2G830

1, A0A5C2GXC2

99592

A0A5C2GAR1, A0A5C2GMH6, A0A5C2GXC2

4, A0A5C2GED2, Q9UKX2, P60827, P13645, A0A5C2GA04, P35908, P54851, A0A5C2GMH6, A0A5C2GA04, A0A5C2GED2, A0A5C2G830  
A0A5C2GA04, A0A5C2GF02, A0A5C2GFF7  
00487, A0A5C2GAR1, A4D2P0, A0A5C2GXC2, P58215, A8K5T0, A0A5C2FYV4, A0A5C2GED2, Q9I

13647, A4D2P0, Q71UI9, 000487, A8K5T0, A0A024R1U4, P50502

99592, P48163

7, A0A5C2GA04, A0A5C2GF02

7, A0A5C2G830, A0A5C2GED2

7, A0A5C2GF02, A0A5C2GA04

1, A0A5C2GXC2, A0A5C2FYV4

7, A0A5C2GXC2, A0A5C2GMH6, A0A5C2GAR1, A0A5C2FYV4

4, P02585, Q9UKX2, P60827, P05496, A0A5C2GED2, A0A5C2FYV4, P50502, A0A5C2GXC2, B4I

4D2P0, P35527, P58215, Q99592

2GED2

0A5C2GXC2, A0A5C2GMH6, A0A5C2GAR1

0A024R1U4, G3V357, P58215, A4D2P0, A0A0G2JLB3, 000487, C9JFR7, A0A1B0GVN9, Q9UKX2,

2GA04, A0A5C2GF02, A0A5C2GED2, Q08722, A0A5C2G830, Q9UKX2

54851, P02585, Q14324, Q9UKX2, P60827, P13645, A0A5C2GED2, P05496, A8K5T0, P50502,

6IAT9, Q9HBA0, Q9NQ79, Q08722, A0A024R1U4, A8K5T0, P50502, Q99592, P58215, A4D2P0,

7, Q71UI9, P13647, A4D2P0, Q8IU7, Q08722, Q9HBA0, Q6IAT9, P35527, P48163, D6RFN0,

7, A0A5C2GMH6, P54851, P35908, 075976, Q08722, Q9HBA0, A0A5C2G830, A0A5C2GF02, A0/

7, Q13438, A0A5C2GXC2, A0A5C2GMH6

54851, 000487, P58215, Q6PKX1, Q99592

50502

0, P13647, 000487, Q71UI9, B4E3L5, Q8IUX7, Q6IAT9, Q9NQ79, Q9HBA0, Q08722, P48163, 13438, P54851, P35908, P35527, P48163, D6RFN0, Q9HBA0, Q6IAT9, Q8IUX7

2GF02, AOA5C2GFF7, Q08722, AOA5C2G830, Q9HBA0, AOA5C2GMH6, P54707, P35908, 075976,

9, Q8IUX7, AOA0G2JLB3, 000487, G3V357, P58215, P13645, P05496, AOA1BOGVN9

2RD19, AOA494COB4, Q6IAT9, P48163, 043263, 075976, P35908, Q13438

7, P54851, AOA5C2GAR1, AOA5C2GMH6, AOA5C2GXC2, P58215, AOA5C2FYV4

7, AOA5C2GXC2, AOA5C2GMH6, AOA5C2GAR1, AOA5C2FYV4, A8K5T0

54707, P54851, P35908, Q08722, Q9HBA0, AOA5C2GAR1, 000487, Q71UI9, AOA5C2FYV4, A8I

2GMH6, Q13438, B7Z7F6, AOA5C2GA04, AOA5C2GED2, P05496, Q9UKX2, P58215, AOA5C2FYV4,

0A5C2GFF7, A0A5C2GF02, Q8IUX7, B4E3L5, 000487, Q71UI9, A0A5C2GXC2, A0A5C2GAR1, A4I  
0, A0A5C2FYV4, A4D2P0, A0A5C2GMH6, A0A5C2GAR1, A0A5C2GXC2, 000487, P54851

6, P54707, A0A5C2GMH6, A0A5C2GA04, P05496, A0A5C2GED2, Q9UKX2, P58215, A0A5C2FYV4,  
6, Q14324, Q9UKX2, P13645, P48163, D6RFN0, P35527, P35908, P54851, Q13438, P45378,  
0A5C2GXC2, 000487, A0A5C2GF02, E9M263, A0A5C2GFF7, Q08722, A0A5C2G830, Q9HBA0, A0A  
35908, P13647

35527, A8K5T0

35908, P13647

6IAT9, A0A494COB4

0A087WUR8, P35908, 075976, 000487

13438, P45378, P48163, P35527, P05496, Q9UKX2, P13645, A0A1BOGVN9, A0A5C2GA04, C9  
6, P13645, Q9UKX2, Q14324, P02585, C9JFR7, H6VRF8, P54851, P35908, Q13438, P45378,

7, A0A1BOGVN9, Q6IAT9, A0A494COB4, P13645, P05496

2RD19, A0A494COB4, Q6IAT9, Q9HBA0, P48163, 043263, 075976, P35908, A0A087WUR8, Q13

0A494C0B4, G3V357, P58215, 000487, A0A0G2JLB3, P05496, P13645

13645, A0A5C2GED2, P05496, P35527, P54707, A0A5C2GMH6, B7Z7F6, Q13438, P35908, 075

0A5C2GFF7, A0A5C2G830, Q08722, Q9NQ79, A0A5C2FYV4, A8K5T0, P58215, Q6PKX1, P50502,  
2, A0A5C2FYV4, A4D2P0, A0A5C2GMH6, A0A5C2GAR1, A0A5C2GXC2, 000487

4, Q8IUX7, A0A087WUR8, P35908, 075976, Q13438, A0A172Q3A0, P48163, 043263

0A5C2GED2, Q9NR99, A0A5C2GA04, A0A5C2GMH6, P35908, 075976, A0A024R6P0, P35527, Q08  
2, A0A5C2FYV4, 000487, A0A5C2GAR1, A0A5C2GMH6, A4D2P0, A0A5C2GXC2

2G830, Q9HBA0, Q08722, Q9UKX2, A0A5C2GFF7, A0A5C2GA04, A0A5C2GF02  
7, A0A5C2GXC2, A0A5C2GAR1, A4D2P0, 000487, A0A5C2FYV4, Q99592, Q9UKX2, A0A5C2GED2,

6PKX1, A0A5C2FYV4, A0A5C2GED2, P60827, Q9UKX2, A0A5C2GA04, P54851, Q13438, A0A5C2C

54851, A0A5C2GMH6, Q13438, Q9NR99, A0A5C2GA04, A0A5C2GED2, Q9UKX2, Q99592, P50502,

0A5C2GED2, Q9NR99, P02585, A0A024R462, P54707, P54851, P35908, A0A024R6P0, D6RFN0,









, Q8IUX7, Q53R15, Q9HBA0, Q9NQ79



. A8K5T0

, D6RJI3, A8K5T0, A0A5C2FYV4, G3V357, P58215, B2R7L2, A0A494COB4, Q9HBA0, Q08722,

A5C2G830, Q08722, Q9HBA0, A0A5C2GFF7, A0A5C2GF02

JKX2, A0A5C2GA04

E3L5, Q71UI9, 000487

, P05496

, Q99592, P58215, A4D2P0, P13647, A0A5C2GXC2, Q71UI9, 000487, B4E3L5

, P13647, 000487, Q71UI9, B4E3L5, Q9NR99, C9JFR7, P02585, Q9UKX2, P13645, P05496

, P54851, H6VRF8, P35908, Q13438, P45378

A5C2GFF7



, D6RFN0, P35527, Q13438, P35908, 075976, P54851

, P54851

X5T0, P58215, P13645, Q9UKX2, A0A5C2GA04, Q13438, P45378, A0A5C2GMH6, P48163, Q9NG

, 000487, A0A5C2GAR1, A0A5C2GXC2

D2P0, P58215, P50502, Q99592, Q6PKX1, A0A5C2FYV4, A8K5T0, A0A5C2GED2, P13645, P608

, 000487, A0A5C2GXC2, A0A5C2GAR1  
, E9M263, Q8IUX7, Q6IAT9, Q08722, Q9HBA0  
A5C2GMH6, P54707, B7Z7F6, Q13438, P35908, P54851

JFR7, Q71UI9, 000487, A0A5C2GAR1, P13647, G3V357, P58215, A0A5C2FYV4, Q6IAT9, A0A4  
, P35527, P48163, D6RFN0, Q08722, Q9HBA0, Q6IAT9, E9M263, Q8IUX7

3438, A0A172Q3A0

5976, P54851, AOA5C2GF02, AOA5C2GFF7, AOA5C2G830, Q08722, Q9HBA0  
, AOA5C2GXC2, P13647, AOA5C2GAR1, Q71UI9, 000487, Q9NR99, AOA5C2GA04, P13645, P608

3722, AOA5C2G830, Q9NQ79, Q8IUX7

, AOA5C2GA04

3MH6, AOA5C2G830, Q08722, Q9HBA0, AOA5C2GFF7, Q8IUX7, AOA5C2GF02

, P58215, A8K5T0, AOA5C2FYV4, 000487, AOA5C2GAR1, A4D2P0, AOA5C2GXC2

, Q9HBA0, Q08722, Q6IAT9, AOA494COB4, E9M263, P13647, AOA5C2GAR1, 000487, Q71UI9,















E9M263, P54707, P35908, P54851, 043263, E9PP21, Q6P528, Q14324, P60827, A0A5C2GED







79, A0A5C2G830, A0A5C2GF02, Q8IUX7, A0A5C2GFF7

327, Q9UKX2, P02585, A0A5C2GA04

I94COB4, Q08722, Q9HBA0, P35908, P54851, P54707, O43263, A0A5C2GED2, Q14324, P0258

327, A0A5C2GED2

A0A5C2FYV4, A8K5T0, P58215, P13645, Q9UKX2, P05496, A0A5C2GA04, C9JFR7, P45378, B















2, P02585, A4D2P0, A0A5C2GXC2, B4E3L5, A0A024R1U4, P50502, Q99592, A8K7Q1











5, A0A0G2JLB3, A4D2P0, A0A5C2GXC2, Q99592, P50502

7Z7F6, Q13438, A0A5C2GMH6, H6VRF8, 075976, P35527, P48163, A0A5C2G830, Q9NQ79, Q8





























IUX7, A0A5C2GF02, A0A5C2GFF7

| ko_id   | ko_descrip | pathway_r | pathway_ilabel | pathway_p | pathway_ilabel | pathway_w                         |
|---------|------------|-----------|----------------|-----------|----------------|-----------------------------------|
| ko00190 | Oxidative  | 2         | P05496 (K0up   | 0 -       | down           | <a href="http://ww">http://ww</a> |
| ko00511 | Other gly  | 0 -       | up             | 1         | A0A0G2JLEdown  | <a href="http://ww">http://ww</a> |
| ko00600 | Sphingoli  | 0 -       | up             | 1         | A0A0G2JLEdown  | <a href="http://ww">http://ww</a> |
| ko00620 | Pyruvate   | 1         | P48163 (K0up   | 0 -       | down           | <a href="http://ww">http://ww</a> |
| ko00860 | Porphyrin  | 1         | A0A1B0GVNup    | 0 -       | down           | <a href="http://ww">http://ww</a> |
| ko01100 | Metabolic  | 4         | P05496 (K0up   | 1         | A0A0G2JLEdown  | <a href="http://ww">http://ww</a> |
| ko01200 | Carbon me  | 1         | P48163 (K0up   | 0 -       | down           | <a href="http://ww">http://ww</a> |
| ko01524 | Platinum   | 1         | C9JFR7 (K0up   | 0 -       | down           | <a href="http://ww">http://ww</a> |
| ko03040 | Spliceosc  | 1         | G3V4C1 (K1up   | 0 -       | down           | <a href="http://ww">http://ww</a> |
| ko03050 | Proteasom  | 1         | 000487 (K0up   | 2         | D6RFN0 (KCdown | <a href="http://ww">http://ww</a> |
| ko03320 | PPAR sign  | 1         | P48163 (K0up   | 1         | B7Z7F6 (KCdown | <a href="http://ww">http://ww</a> |
| ko03420 | Nucleotid  | 0 -       | up             | 1         | A0A494C0Edown  | <a href="http://ww">http://ww</a> |
| ko04010 | MAPK sign  | 1         | A4D2P0 (K0up   | 0 -       | down           | <a href="http://ww">http://ww</a> |
| ko04014 | Ras signa  | 2         | A0A024R1Uup    | 0 -       | down           | <a href="http://ww">http://ww</a> |
| ko04015 | Rapl sign  | 1         | A4D2P0 (K0up   | 0 -       | down           | <a href="http://ww">http://ww</a> |
| ko04020 | Calcium s  | 0 -       | up             | 1         | P02585 (K1down | <a href="http://ww">http://ww</a> |
| ko04024 | cAMP sign  | 1         | A4D2P0 (K0up   | 0 -       | down           | <a href="http://ww">http://ww</a> |
| ko04062 | Chemokine  | 1         | A4D2P0 (K0up   | 0 -       | down           | <a href="http://ww">http://ww</a> |
| ko04066 | HIF-1 sig  | 0 -       | up             | 1         | B4E3L5 (KCdown | <a href="http://ww">http://ww</a> |
| ko04071 | Sphingoli  | 1         | A4D2P0 (K0up   | 0 -       | down           | <a href="http://ww">http://ww</a> |
| ko04115 | p53 signa  | 1         | C9JFR7 (K0up   | 0 -       | down           | <a href="http://ww">http://ww</a> |
| ko04141 | Protein p  | 0 -       | up             | 2         | A0A494C0Edown  | <a href="http://ww">http://ww</a> |
| ko04142 | Lysosome   | 0 -       | up             | 1         | A0A0G2JLEdown  | <a href="http://ww">http://ww</a> |
| ko04144 | Endocytos  | 1         | A0A024R1Uup    | 0 -       | down           | <a href="http://ww">http://ww</a> |
| ko04145 | Phagosome  | 2         | A0A024R1Uup    | 0 -       | down           | <a href="http://ww">http://ww</a> |
| ko04151 | PI3K-Akt   | 1         | A4D2P0 (K0up   | 1         | A0A024R46down  | <a href="http://ww">http://ww</a> |
| ko04210 | Apoptosis  | 1         | C9JFR7 (K0up   | 0 -       | down           | <a href="http://ww">http://ww</a> |
| ko04215 | Apoptosis  | 1         | C9JFR7 (K0up   | 0 -       | down           | <a href="http://ww">http://ww</a> |
| ko04217 | Necroptos  | 1         | Q71UI9 (K1up   | 0 -       | down           | <a href="http://ww">http://ww</a> |
| ko04218 | Cellular   | 1         | Q9HBA0 (K0up   | 0 -       | down           | <a href="http://ww">http://ww</a> |
| ko04310 | Wnt signa  | 1         | A4D2P0 (K0up   | 0 -       | down           | <a href="http://ww">http://ww</a> |
| ko04350 | TGF-beta   | 1         | D6RJI3 (K1up   | 0 -       | down           | <a href="http://ww">http://ww</a> |
| ko04360 | Axon guid  | 1         | A4D2P0 (K0up   | 0 -       | down           | <a href="http://ww">http://ww</a> |
| ko04370 | VEGF sign  | 1         | A4D2P0 (K0up   | 0 -       | down           | <a href="http://ww">http://ww</a> |
| ko04380 | Osteoclas  | 1         | A4D2P0 (K0up   | 0 -       | down           | <a href="http://ww">http://ww</a> |
| ko04510 | Focal adh  | 1         | A4D2P0 (K0up   | 2         | A0A024R46down  | <a href="http://ww">http://ww</a> |
| ko04512 | ECM-recep  | 1         | Q08722 (K0up   | 1         | A0A024R46down  | <a href="http://ww">http://ww</a> |
| ko04520 | Adherens   | 1         | A4D2P0 (K0up   | 0 -       | down           | <a href="http://ww">http://ww</a> |
| ko04530 | Tight jun  | 1         | A4D2P0 (K0up   | 1         | Q9UKX2 (K1down | <a href="http://ww">http://ww</a> |
| ko04610 | Complemen  | 1         | A8K5T0 (K0up   | 0 -       | down           | <a href="http://ww">http://ww</a> |
| ko04620 | Toll-like  | 1         | A4D2P0 (K0up   | 0 -       | down           | <a href="http://ww">http://ww</a> |
| ko04650 | Natural k  | 1         | A4D2P0 (K0up   | 0 -       | down           | <a href="http://ww">http://ww</a> |
| ko04662 | B cell re  | 1         | A4D2P0 (K0up   | 0 -       | down           | <a href="http://ww">http://ww</a> |
| ko04664 | Fc epsilo  | 1         | A4D2P0 (K0up   | 0 -       | down           | <a href="http://ww">http://ww</a> |
| ko04666 | Fc gamma   | 1         | A4D2P0 (K0up   | 0 -       | down           | <a href="http://ww">http://ww</a> |
| ko04670 | Leukocyte  | 1         | A4D2P0 (K0up   | 1         | H3BPK4 (K1down | <a href="http://ww">http://ww</a> |
| ko04714 | Thermogen  | 1         | P05496 (K0up   | 0 -       | down           | <a href="http://ww">http://ww</a> |
| ko04722 | Neurotrop  | 1         | A4D2P0 (K0up   | 0 -       | down           | <a href="http://ww">http://ww</a> |
| ko04750 | Inflammat  | 1         | Q9HBA0 (K0up   | 0 -       | down           | <a href="http://ww">http://ww</a> |
| ko04810 | Regulatio  | 1         | A4D2P0 (K0up   | 2         | A0A024R46down  | <a href="http://ww">http://ww</a> |

|         |           |             |    |              |      |                                   |
|---------|-----------|-------------|----|--------------|------|-----------------------------------|
| ko04915 | Estrogen  | 0 -         | up | 2 P13645 (KC | down | <a href="http://ww">http://ww</a> |
| ko04923 | Regulatio | 0 -         | up | 1 B7Z7F6 (KC | down | <a href="http://ww">http://ww</a> |
| ko04932 | Non-alcoh | 2 C9JFR7 (K | up | 0 -          | down | <a href="http://ww">http://ww</a> |
| ko04933 | AGE-RAGE  | 1 A4D2P0 (K | up | 1 A0A024R46  | down | <a href="http://ww">http://ww</a> |
| ko04934 | Cushing s | 0 -         | up | 1 B4E3L5 (KC | down | <a href="http://ww">http://ww</a> |
| ko04962 | Vasopress | 1 A0A024R1U | up | 0 -          | down | <a href="http://ww">http://ww</a> |
| ko04972 | Pancreati | 1 A4D2P0 (K | up | 1 A0A087WUR  | down | <a href="http://ww">http://ww</a> |
| ko04974 | Protein d | 0 -         | up | 1 A0A087WUR  | down | <a href="http://ww">http://ww</a> |
| ko05010 | Alzheimer | 2 P05496 (K | up | 0 -          | down | <a href="http://ww">http://ww</a> |
| ko05012 | Parkinson | 2 P05496 (K | up | 0 -          | down | <a href="http://ww">http://ww</a> |
| ko05014 | Amyotroph | 2 C9JFR7 (K | up | 0 -          | down | <a href="http://ww">http://ww</a> |
| ko05016 | Huntingto | 2 P05496 (K | up | 0 -          | down | <a href="http://ww">http://ww</a> |
| ko05034 | Alcoholis | 1 Q71UI9 (K | up | 0 -          | down | <a href="http://ww">http://ww</a> |
| ko05100 | Bacterial | 1 A4D2P0 (K | up | 1 A0A024R46  | down | <a href="http://ww">http://ww</a> |
| ko05120 | Epithelia | 1 A4D2P0 (K | up | 0 -          | down | <a href="http://ww">http://ww</a> |
| ko05130 | Pathogeni | 2 C9JFR7 (K | up | 1 Q9UKX2 (K  | down | <a href="http://ww">http://ww</a> |
| ko05131 | Shigellos | 2 C9JFR7 (K | up | 1 H3BPK4 (K  | down | <a href="http://ww">http://ww</a> |
| ko05132 | Salmonell | 3 A0A024R1U | up | 1 Q9UKX2 (K  | down | <a href="http://ww">http://ww</a> |
| ko05134 | Legionell | 1 C9JFR7 (K | up | 0 -          | down | <a href="http://ww">http://ww</a> |
| ko05135 | Yersinia  | 1 A4D2P0 (K | up | 1 A0A024R46  | down | <a href="http://ww">http://ww</a> |
| ko05143 | African t | 0 -         | up | 1 E9M263 (K  | down | <a href="http://ww">http://ww</a> |
| ko05144 | Malaria   | 0 -         | up | 1 E9M263 (K  | down | <a href="http://ww">http://ww</a> |
| ko05145 | Toxoplas  | 1 C9JFR7 (K | up | 0 -          | down | <a href="http://ww">http://ww</a> |
| ko05146 | Amoebiasi | 1 A0A024R1U | up | 1 A0A024R46  | down | <a href="http://ww">http://ww</a> |
| ko05150 | Staphyloc | 1 A8K5T0 (K | up | 2 P13645 (KC | down | <a href="http://ww">http://ww</a> |
| ko05152 | Tuberculo | 2 A0A024R1U | up | 0 -          | down | <a href="http://ww">http://ww</a> |
| ko05160 | Hepatitis | 1 C9JFR7 (K | up | 0 -          | down | <a href="http://ww">http://ww</a> |
| ko05161 | Hepatitis | 1 C9JFR7 (K | up | 0 -          | down | <a href="http://ww">http://ww</a> |
| ko05162 | Measles   | 1 C9JFR7 (K | up | 0 -          | down | <a href="http://ww">http://ww</a> |
| ko05163 | Human cyt | 2 C9JFR7 (K | up | 0 -          | down | <a href="http://ww">http://ww</a> |
| ko05164 | Influenza | 1 C9JFR7 (K | up | 0 -          | down | <a href="http://ww">http://ww</a> |
| ko05165 | Human pap | 0 -         | up | 1 A0A024R46  | down | <a href="http://ww">http://ww</a> |
| ko05167 | Kaposi sa | 2 C9JFR7 (K | up | 0 -          | down | <a href="http://ww">http://ww</a> |
| ko05168 | Herpes si | 1 C9JFR7 (K | up | 0 -          | down | <a href="http://ww">http://ww</a> |
| ko05169 | Epstein-B | 3 C9JFR7 (K | up | 1 D6RFN0 (KC | down | <a href="http://ww">http://ww</a> |
| ko05170 | Human imm | 2 C9JFR7 (K | up | 0 -          | down | <a href="http://ww">http://ww</a> |
| ko05200 | Pathways  | 2 C9JFR7 (K | up | 2 B4E3L5 (KC | down | <a href="http://ww">http://ww</a> |
| ko05203 | Viral car | 1 A4D2P0 (K | up | 0 -          | down | <a href="http://ww">http://ww</a> |
| ko05204 | Chemical  | 0 -         | up | 1 B4E3L5 (KC | down | <a href="http://ww">http://ww</a> |
| ko05205 | Proteogly | 1 A4D2P0 (K | up | 1 A0A024R46  | down | <a href="http://ww">http://ww</a> |
| ko05210 | Colorecta | 2 C9JFR7 (K | up | 0 -          | down | <a href="http://ww">http://ww</a> |
| ko05211 | Renal cel | 1 A4D2P0 (K | up | 1 B4E3L5 (KC | down | <a href="http://ww">http://ww</a> |
| ko05212 | Pancreati | 1 A4D2P0 (K | up | 0 -          | down | <a href="http://ww">http://ww</a> |
| ko05222 | Small cel | 1 C9JFR7 (K | up | 1 A0A024R46  | down | <a href="http://ww">http://ww</a> |
| ko05231 | Choline m | 1 A4D2P0 (K | up | 0 -          | down | <a href="http://ww">http://ww</a> |
| ko05322 | Systemic  | 1 Q71UI9 (K | up | 0 -          | down | <a href="http://ww">http://ww</a> |
| ko05416 | Viral myo | 2 C9JFR7 (K | up | 0 -          | down | <a href="http://ww">http://ww</a> |
| ko05418 | Fluid she | 2 Q9HBA0 (K | up | 0 -          | down | <a href="http://ww">http://ww</a> |

reb

w. genome. jp/kegg-bin/show\_pathway?ko00190/K01544%09red/K02128%09red  
w. genome. jp/kegg-bin/show\_pathway?ko00511/K01201%09green  
w. genome. jp/kegg-bin/show\_pathway?ko00600/K01201%09green  
w. genome. jp/kegg-bin/show\_pathway?ko00620/K00029%09red  
w. genome. jp/kegg-bin/show\_pathway?ko00860/K01599%09red  
w. genome. jp/kegg-bin/show\_pathway?ko01100/K00029%09red/K01201%09green/K01544%09re  
w. genome. jp/kegg-bin/show\_pathway?ko01200/K00029%09red  
w. genome. jp/kegg-bin/show\_pathway?ko01524/K08738%09red  
w. genome. jp/kegg-bin/show\_pathway?ko03040/K12884%09red  
w. genome. jp/kegg-bin/show\_pathway?ko03050/K02738%09green/K03030%09red/K03035%09gr  
w. genome. jp/kegg-bin/show\_pathway?ko03320/K00029%09red/K08771%09green  
w. genome. jp/kegg-bin/show\_pathway?ko03420/K10839%09green  
w. genome. jp/kegg-bin/show\_pathway?ko04010/K04392%09red  
w. genome. jp/kegg-bin/show\_pathway?ko04014/K04392%09red/K07889%09red  
w. genome. jp/kegg-bin/show\_pathway?ko04015/K04392%09red  
w. genome. jp/kegg-bin/show\_pathway?ko04020/K12042%09green  
w. genome. jp/kegg-bin/show\_pathway?ko04024/K04392%09red  
w. genome. jp/kegg-bin/show\_pathway?ko04062/K04392%09red  
w. genome. jp/kegg-bin/show\_pathway?ko04066/K09097%09green  
w. genome. jp/kegg-bin/show\_pathway?ko04071/K04392%09red  
w. genome. jp/kegg-bin/show\_pathway?ko04115/K08738%09red  
w. genome. jp/kegg-bin/show\_pathway?ko04141/K10088%09green/K10839%09green  
w. genome. jp/kegg-bin/show\_pathway?ko04142/K01201%09green  
w. genome. jp/kegg-bin/show\_pathway?ko04144/K07889%09red  
w. genome. jp/kegg-bin/show\_pathway?ko04145/K04392%09red/K07889%09red  
w. genome. jp/kegg-bin/show\_pathway?ko04151/K04392%09red/K05717%09green  
w. genome. jp/kegg-bin/show\_pathway?ko04210/K08738%09red  
w. genome. jp/kegg-bin/show\_pathway?ko04215/K08738%09red  
w. genome. jp/kegg-bin/show\_pathway?ko04217/K11251%09red  
w. genome. jp/kegg-bin/show\_pathway?ko04218/K04973%09red  
w. genome. jp/kegg-bin/show\_pathway?ko04310/K04392%09red  
w. genome. jp/kegg-bin/show\_pathway?ko04350/K19559%09red  
w. genome. jp/kegg-bin/show\_pathway?ko04360/K04392%09red  
w. genome. jp/kegg-bin/show\_pathway?ko04370/K04392%09red  
w. genome. jp/kegg-bin/show\_pathway?ko04380/K04392%09red  
w. genome. jp/kegg-bin/show\_pathway?ko04510/K04392%09red/K05717%09green/K12758%09gr  
w. genome. jp/kegg-bin/show\_pathway?ko04512/K05717%09green/K06266%09red  
w. genome. jp/kegg-bin/show\_pathway?ko04520/K04392%09red  
w. genome. jp/kegg-bin/show\_pathway?ko04530/K04392%09red/K10352%09green  
w. genome. jp/kegg-bin/show\_pathway?ko04610/K04004%09red  
w. genome. jp/kegg-bin/show\_pathway?ko04620/K04392%09red  
w. genome. jp/kegg-bin/show\_pathway?ko04650/K04392%09red  
w. genome. jp/kegg-bin/show\_pathway?ko04662/K04392%09red  
w. genome. jp/kegg-bin/show\_pathway?ko04664/K04392%09red  
w. genome. jp/kegg-bin/show\_pathway?ko04666/K04392%09red  
w. genome. jp/kegg-bin/show\_pathway?ko04670/K04392%09red/K12758%09green  
w. genome. jp/kegg-bin/show\_pathway?ko04714/K02128%09red  
w. genome. jp/kegg-bin/show\_pathway?ko04722/K04392%09red  
w. genome. jp/kegg-bin/show\_pathway?ko04750/K04973%09red  
w. genome. jp/kegg-bin/show\_pathway?ko04810/K04392%09red/K05717%09green/K12758%09gr

w. genome. jp/kegg-bin/show\_pathway?ko04915/K07604%09green  
w. genome. jp/kegg-bin/show\_pathway?ko04923/K08771%09green  
w. genome. jp/kegg-bin/show\_pathway?ko04932/K04392%09red/K08738%09red  
w. genome. jp/kegg-bin/show\_pathway?ko04933/K04392%09red/K05717%09green  
w. genome. jp/kegg-bin/show\_pathway?ko04934/K09097%09green  
w. genome. jp/kegg-bin/show\_pathway?ko04962/K07889%09red  
w. genome. jp/kegg-bin/show\_pathway?ko04972/K04392%09red/K09632%09green  
w. genome. jp/kegg-bin/show\_pathway?ko04974/K09632%09green  
w. genome. jp/kegg-bin/show\_pathway?ko05010/K02128%09red/K08738%09red  
w. genome. jp/kegg-bin/show\_pathway?ko05012/K02128%09red/K08738%09red  
w. genome. jp/kegg-bin/show\_pathway?ko05014/K04392%09red/K08738%09red  
w. genome. jp/kegg-bin/show\_pathway?ko05016/K02128%09red/K08738%09red  
w. genome. jp/kegg-bin/show\_pathway?ko05034/K11251%09red  
w. genome. jp/kegg-bin/show\_pathway?ko05100/K04392%09red/K05717%09green  
w. genome. jp/kegg-bin/show\_pathway?ko05120/K04392%09red  
w. genome. jp/kegg-bin/show\_pathway?ko05130/K04392%09red/K08738%09red/K10352%09gree  
w. genome. jp/kegg-bin/show\_pathway?ko05131/K04392%09red/K08738%09red/K12758%09gree  
w. genome. jp/kegg-bin/show\_pathway?ko05132/K04392%09red/K07889%09red/K08738%09red/  
w. genome. jp/kegg-bin/show\_pathway?ko05134/K08738%09red  
w. genome. jp/kegg-bin/show\_pathway?ko05135/K04392%09red/K05717%09green  
w. genome. jp/kegg-bin/show\_pathway?ko05143/K13823%09green  
w. genome. jp/kegg-bin/show\_pathway?ko05144/K13823%09green  
w. genome. jp/kegg-bin/show\_pathway?ko05145/K08738%09red  
w. genome. jp/kegg-bin/show\_pathway?ko05146/K05717%09green/K07889%09red  
w. genome. jp/kegg-bin/show\_pathway?ko05150/K04004%09red/K07604%09green  
w. genome. jp/kegg-bin/show\_pathway?ko05152/K07889%09red/K08738%09red  
w. genome. jp/kegg-bin/show\_pathway?ko05160/K08738%09red  
w. genome. jp/kegg-bin/show\_pathway?ko05161/K08738%09red  
w. genome. jp/kegg-bin/show\_pathway?ko05162/K08738%09red  
w. genome. jp/kegg-bin/show\_pathway?ko05163/K04392%09red/K08738%09red  
w. genome. jp/kegg-bin/show\_pathway?ko05164/K08738%09red  
w. genome. jp/kegg-bin/show\_pathway?ko05165/K05717%09green  
w. genome. jp/kegg-bin/show\_pathway?ko05167/K04392%09red/K08738%09red  
w. genome. jp/kegg-bin/show\_pathway?ko05168/K08738%09red  
w. genome. jp/kegg-bin/show\_pathway?ko05169/K03030%09red/K03035%09green/K04392%09re  
w. genome. jp/kegg-bin/show\_pathway?ko05170/K04392%09red/K08738%09red  
w. genome. jp/kegg-bin/show\_pathway?ko05200/K04392%09red/K05717%09green/K08738%09re  
w. genome. jp/kegg-bin/show\_pathway?ko05203/K04392%09red  
w. genome. jp/kegg-bin/show\_pathway?ko05204/K09097%09green  
w. genome. jp/kegg-bin/show\_pathway?ko05205/K04392%09red/K05717%09green  
w. genome. jp/kegg-bin/show\_pathway?ko05210/K04392%09red/K08738%09red  
w. genome. jp/kegg-bin/show\_pathway?ko05211/K04392%09red/K09097%09green  
w. genome. jp/kegg-bin/show\_pathway?ko05212/K04392%09red  
w. genome. jp/kegg-bin/show\_pathway?ko05222/K05717%09green/K08738%09red  
w. genome. jp/kegg-bin/show\_pathway?ko05231/K04392%09red  
w. genome. jp/kegg-bin/show\_pathway?ko05322/K11251%09red  
w. genome. jp/kegg-bin/show\_pathway?ko05416/K04392%09red/K08738%09red  
w. genome. jp/kegg-bin/show\_pathway?ko05418/K04392%09red/K04973%09red

d/K01599%09red/K02128%09red

een

een

een

n  
n  
K10352%09green

d/K08738%09red

d/K09097%09green



| ko-ID   | descripti | Input num | Input all | Backgroun | Backgroun | P value  | Corrected | protein i  |
|---------|-----------|-----------|-----------|-----------|-----------|----------|-----------|------------|
| ko05169 | Epstein-B | 4         | 29        | 26        | 1031      | 0.004923 | 0.196927  | C9JFR7 (KC |
| ko05416 | Viral myo | 2         | 29        | 10        | 1031      | 0.029901 | 0.222239  | C9JFR7 (KC |
| ko05210 | Colorecta | 2         | 29        | 10        | 1031      | 0.029901 | 0.222239  | C9JFR7 (KC |
| ko04932 | Non-alcoh | 2         | 29        | 11        | 1031      | 0.035915 | 0.222239  | C9JFR7 (KC |
| ko05014 | Amyotroph | 2         | 29        | 11        | 1031      | 0.035915 | 0.222239  | C9JFR7 (KC |
| ko03050 | Proteasom | 3         | 29        | 29        | 1031      | 0.044724 | 0.222239  | 000487 (KC |
| ko00190 | Oxidative | 2         | 29        | 14        | 1031      | 0.056406 | 0.222239  | P05496 (KC |
| ko03320 | PPAR sign | 2         | 29        | 14        | 1031      | 0.056406 | 0.222239  | P48163 (KC |
| ko05132 | Salmonell | 4         | 29        | 54        | 1031      | 0.060204 | 0.222239  | A0A024R1U  |
| ko05222 | Small cel | 2         | 29        | 15        | 1031      | 0.063967 | 0.222239  | C9JFR7 (KC |
| ko05211 | Renal cel | 2         | 29        | 15        | 1031      | 0.063967 | 0.222239  | A4D2P0 (KC |
| ko05150 | Staphyloc | 3         | 29        | 34        | 1031      | 0.066672 | 0.222239  | A8K5T0 (KC |
| ko05167 | Kaposi sa | 2         | 29        | 18        | 1031      | 0.088508 | 0.271497  | C9JFR7 (KC |
| ko05135 | Yersinia  | 2         | 29        | 20        | 1031      | 0.1062   | 0.271497  | A4D2P0 (KC |
| ko05130 | Pathogeni | 3         | 29        | 42        | 1031      | 0.110137 | 0.271497  | C9JFR7 (KC |
| ko05200 | Pathways  | 4         | 29        | 67        | 1031      | 0.11332  | 0.271497  | C9JFR7 (KC |
| ko04972 | Pancreati | 2         | 29        | 21        | 1031      | 0.115386 | 0.271497  | A4D2P0 (KC |
| ko04915 | Estrogen  | 2         | 29        | 22        | 1031      | 0.124773 | 0.273327  | P13645 (KC |
| ko05012 | Parkinson | 2         | 29        | 23        | 1031      | 0.134345 | 0.273327  | P05496 (KC |
| ko05170 | Human imm | 2         | 29        | 25        | 1031      | 0.153972 | 0.273327  | C9JFR7 (KC |
| ko05131 | Shigellos | 3         | 29        | 50        | 1031      | 0.162095 | 0.273327  | C9JFR7 (KC |
| ko04670 | Leukocyte | 2         | 29        | 26        | 1031      | 0.163996 | 0.273327  | A4D2P0 (KC |
| ko05418 | Fluid she | 2         | 29        | 26        | 1031      | 0.163996 | 0.273327  | Q9HBA0 (KC |
| ko05152 | Tuberculo | 2         | 29        | 26        | 1031      | 0.163996 | 0.273327  | A0A024R1U  |
| ko04933 | AGE-RAGE  | 2         | 29        | 27        | 1031      | 0.174142 | 0.278627  | A4D2P0 (KC |
| ko05163 | Human cyt | 2         | 29        | 29        | 1031      | 0.19474  | 0.2996    | C9JFR7 (KC |
| ko05100 | Bacterial | 2         | 29        | 31        | 1031      | 0.215662 | 0.319499  | A4D2P0 (KC |
| ko04530 | Tight jun | 2         | 29        | 34        | 1031      | 0.247447 | 0.353495  | A4D2P0 (KC |
| ko05016 | Huntingto | 2         | 29        | 35        | 1031      | 0.258106 | 0.354057  | P05496 (KC |
| ko04014 | Ras signa | 2         | 29        | 36        | 1031      | 0.268781 | 0.354057  | A0A024R1U  |
| ko04810 | Regulatio | 3         | 29        | 65        | 1031      | 0.274394 | 0.354057  | A4D2P0 (KC |
| ko05146 | Amoebiasi | 2         | 29        | 39        | 1031      | 0.300816 | 0.37602   | A0A024R1U  |
| ko04145 | Phagosome | 2         | 29        | 40        | 1031      | 0.31147  | 0.37754   | A0A024R1U  |
| ko04510 | Focal adh | 3         | 29        | 72        | 1031      | 0.330088 | 0.388339  | A4D2P0 (KC |
| ko05010 | Alzheimer | 2         | 29        | 45        | 1031      | 0.364241 | 0.416275  | P05496 (KC |
| ko04512 | ECM-recep | 2         | 29        | 47        | 1031      | 0.385003 | 0.427781  | Q08722 (KC |
| ko04141 | Protein p | 2         | 29        | 56        | 1031      | 0.474743 | 0.509759  | A0A494COE  |
| ko05205 | Proteogly | 2         | 29        | 57        | 1031      | 0.484271 | 0.509759  | A4D2P0 (KC |
| ko04151 | PI3K-Akt  | 2         | 29        | 73        | 1031      | 0.622253 | 0.638208  | A4D2P0 (KC |
| ko01100 | Metabolic | 5         | 29        | 232       | 1031      | 0.817894 | 0.817894  | P05496 (KC |

pathway-web

[http://www.genome.jp/kegg-bin/show\\_pathway?ko05169/K08738%09cyan/K04392%09cyan/K0](http://www.genome.jp/kegg-bin/show_pathway?ko05169/K08738%09cyan/K04392%09cyan/K0)  
[http://www.genome.jp/kegg-bin/show\\_pathway?ko05416/K08738%09cyan/K04392%09cyan](http://www.genome.jp/kegg-bin/show_pathway?ko05416/K08738%09cyan/K04392%09cyan)  
[http://www.genome.jp/kegg-bin/show\\_pathway?ko05210/K08738%09cyan/K04392%09cyan](http://www.genome.jp/kegg-bin/show_pathway?ko05210/K08738%09cyan/K04392%09cyan)  
[http://www.genome.jp/kegg-bin/show\\_pathway?ko04932/K08738%09cyan/K04392%09cyan](http://www.genome.jp/kegg-bin/show_pathway?ko04932/K08738%09cyan/K04392%09cyan)  
[http://www.genome.jp/kegg-bin/show\\_pathway?ko05014/K08738%09cyan/K04392%09cyan](http://www.genome.jp/kegg-bin/show_pathway?ko05014/K08738%09cyan/K04392%09cyan)  
[http://www.genome.jp/kegg-bin/show\\_pathway?ko03050/K03030%09cyan/K03035%09cyan/K0](http://www.genome.jp/kegg-bin/show_pathway?ko03050/K03030%09cyan/K03035%09cyan/K0)  
[http://www.genome.jp/kegg-bin/show\\_pathway?ko00190/K02128%09cyan/K01544%09cyan](http://www.genome.jp/kegg-bin/show_pathway?ko00190/K02128%09cyan/K01544%09cyan)  
[http://www.genome.jp/kegg-bin/show\\_pathway?ko03320/K00029%09cyan/K08771%09cyan](http://www.genome.jp/kegg-bin/show_pathway?ko03320/K00029%09cyan/K08771%09cyan)  
[http://www.genome.jp/kegg-bin/show\\_pathway?ko05132/K07889%09cyan/K08738%09cyan/K0](http://www.genome.jp/kegg-bin/show_pathway?ko05132/K07889%09cyan/K08738%09cyan/K0)  
[http://www.genome.jp/kegg-bin/show\\_pathway?ko05222/K08738%09cyan/K05717%09cyan](http://www.genome.jp/kegg-bin/show_pathway?ko05222/K08738%09cyan/K05717%09cyan)  
[http://www.genome.jp/kegg-bin/show\\_pathway?ko05211/K04392%09cyan/K09097%09cyan](http://www.genome.jp/kegg-bin/show_pathway?ko05211/K04392%09cyan/K09097%09cyan)  
[http://www.genome.jp/kegg-bin/show\\_pathway?ko05150/K04004%09cyan/K07604%09cyan/K0](http://www.genome.jp/kegg-bin/show_pathway?ko05150/K04004%09cyan/K07604%09cyan/K0)  
[http://www.genome.jp/kegg-bin/show\\_pathway?ko05167/K08738%09cyan/K04392%09cyan](http://www.genome.jp/kegg-bin/show_pathway?ko05167/K08738%09cyan/K04392%09cyan)  
[http://www.genome.jp/kegg-bin/show\\_pathway?ko05135/K04392%09cyan/K05717%09cyan](http://www.genome.jp/kegg-bin/show_pathway?ko05135/K04392%09cyan/K05717%09cyan)  
[http://www.genome.jp/kegg-bin/show\\_pathway?ko05130/K08738%09cyan/K04392%09cyan/K1](http://www.genome.jp/kegg-bin/show_pathway?ko05130/K08738%09cyan/K04392%09cyan/K1)  
[http://www.genome.jp/kegg-bin/show\\_pathway?ko05200/K08738%09cyan/K04392%09cyan/K0](http://www.genome.jp/kegg-bin/show_pathway?ko05200/K08738%09cyan/K04392%09cyan/K0)  
[http://www.genome.jp/kegg-bin/show\\_pathway?ko04972/K04392%09cyan/K09632%09cyan](http://www.genome.jp/kegg-bin/show_pathway?ko04972/K04392%09cyan/K09632%09cyan)  
[http://www.genome.jp/kegg-bin/show\\_pathway?ko04915/K07604%09cyan/K07604%09cyan](http://www.genome.jp/kegg-bin/show_pathway?ko04915/K07604%09cyan/K07604%09cyan)  
[http://www.genome.jp/kegg-bin/show\\_pathway?ko05012/K02128%09cyan/K08738%09cyan](http://www.genome.jp/kegg-bin/show_pathway?ko05012/K02128%09cyan/K08738%09cyan)  
[http://www.genome.jp/kegg-bin/show\\_pathway?ko05170/K08738%09cyan/K04392%09cyan](http://www.genome.jp/kegg-bin/show_pathway?ko05170/K08738%09cyan/K04392%09cyan)  
[http://www.genome.jp/kegg-bin/show\\_pathway?ko05131/K08738%09cyan/K04392%09cyan/K1](http://www.genome.jp/kegg-bin/show_pathway?ko05131/K08738%09cyan/K04392%09cyan/K1)  
[http://www.genome.jp/kegg-bin/show\\_pathway?ko04670/K04392%09cyan/K12758%09cyan](http://www.genome.jp/kegg-bin/show_pathway?ko04670/K04392%09cyan/K12758%09cyan)  
[http://www.genome.jp/kegg-bin/show\\_pathway?ko05418/K04973%09cyan/K04392%09cyan](http://www.genome.jp/kegg-bin/show_pathway?ko05418/K04973%09cyan/K04392%09cyan)  
[http://www.genome.jp/kegg-bin/show\\_pathway?ko05152/K07889%09cyan/K08738%09cyan](http://www.genome.jp/kegg-bin/show_pathway?ko05152/K07889%09cyan/K08738%09cyan)  
[http://www.genome.jp/kegg-bin/show\\_pathway?ko04933/K04392%09cyan/K05717%09cyan](http://www.genome.jp/kegg-bin/show_pathway?ko04933/K04392%09cyan/K05717%09cyan)  
[http://www.genome.jp/kegg-bin/show\\_pathway?ko05163/K08738%09cyan/K04392%09cyan](http://www.genome.jp/kegg-bin/show_pathway?ko05163/K08738%09cyan/K04392%09cyan)  
[http://www.genome.jp/kegg-bin/show\\_pathway?ko05100/K04392%09cyan/K05717%09cyan](http://www.genome.jp/kegg-bin/show_pathway?ko05100/K04392%09cyan/K05717%09cyan)  
[http://www.genome.jp/kegg-bin/show\\_pathway?ko04530/K04392%09cyan/K10352%09cyan](http://www.genome.jp/kegg-bin/show_pathway?ko04530/K04392%09cyan/K10352%09cyan)  
[http://www.genome.jp/kegg-bin/show\\_pathway?ko05016/K02128%09cyan/K08738%09cyan](http://www.genome.jp/kegg-bin/show_pathway?ko05016/K02128%09cyan/K08738%09cyan)  
[http://www.genome.jp/kegg-bin/show\\_pathway?ko04014/K07889%09cyan/K04392%09cyan](http://www.genome.jp/kegg-bin/show_pathway?ko04014/K07889%09cyan/K04392%09cyan)  
[http://www.genome.jp/kegg-bin/show\\_pathway?ko04810/K04392%09cyan/K05717%09cyan/K1](http://www.genome.jp/kegg-bin/show_pathway?ko04810/K04392%09cyan/K05717%09cyan/K1)  
[http://www.genome.jp/kegg-bin/show\\_pathway?ko05146/K07889%09cyan/K05717%09cyan](http://www.genome.jp/kegg-bin/show_pathway?ko05146/K07889%09cyan/K05717%09cyan)  
[http://www.genome.jp/kegg-bin/show\\_pathway?ko04145/K07889%09cyan/K04392%09cyan](http://www.genome.jp/kegg-bin/show_pathway?ko04145/K07889%09cyan/K04392%09cyan)  
[http://www.genome.jp/kegg-bin/show\\_pathway?ko04510/K04392%09cyan/K05717%09cyan/K1](http://www.genome.jp/kegg-bin/show_pathway?ko04510/K04392%09cyan/K05717%09cyan/K1)  
[http://www.genome.jp/kegg-bin/show\\_pathway?ko05010/K02128%09cyan/K08738%09cyan](http://www.genome.jp/kegg-bin/show_pathway?ko05010/K02128%09cyan/K08738%09cyan)  
[http://www.genome.jp/kegg-bin/show\\_pathway?ko04512/K06266%09cyan/K05717%09cyan](http://www.genome.jp/kegg-bin/show_pathway?ko04512/K06266%09cyan/K05717%09cyan)  
[http://www.genome.jp/kegg-bin/show\\_pathway?ko04141/K10839%09cyan/K10088%09cyan](http://www.genome.jp/kegg-bin/show_pathway?ko04141/K10839%09cyan/K10088%09cyan)  
[http://www.genome.jp/kegg-bin/show\\_pathway?ko05205/K04392%09cyan/K05717%09cyan](http://www.genome.jp/kegg-bin/show_pathway?ko05205/K04392%09cyan/K05717%09cyan)  
[http://www.genome.jp/kegg-bin/show\\_pathway?ko04151/K04392%09cyan/K05717%09cyan](http://www.genome.jp/kegg-bin/show_pathway?ko04151/K04392%09cyan/K05717%09cyan)  
[http://www.genome.jp/kegg-bin/show\\_pathway?ko01100/K02128%09cyan/K01599%09cyan/K0](http://www.genome.jp/kegg-bin/show_pathway?ko01100/K02128%09cyan/K01599%09cyan/K0)

3030%09cyan/K03035%09cyan

2738%09cyan

4392%09cyan/K10352%09cyan

7604%09cyan

0352%09cyan  
9097%09cyan/K05717%09cyan

2758%09cyan

2758%09cyan

2758%09cyan

1544%09cyan/K00029%09cyan/K01201%09cyan
